# Supplementary material for: Deciphering the regulatory genome of Escherichia coli, one hundred promoters at a time
Source: eLife. 2020 Sep 21;9:e55308. doi: 10.7554/eLife.55308 (PMC7567609; doi:10.7554/eLife.55308)
Supplement: Appendix 2—figure 3—source data 1. [file elife-55308-app2-fig3-data1.xlsx]

## Sheet: Information footprints
#Information footprint values displayed in Appendix 2 Figure 2
#Mutual information is always positive, but here, a negative value is assigned to denote those bases that are repressor like. Displayed information footprints are smoothed by averaging with neighbors.
Position	info_dicC	info_araAB	info_araC	info_rspA	info_dgoR	info_dicA	info_ftsK	info_lac	info_marR	info_rel	info_znuA	info_xylA	info_xylF	info_znuCB
-115	0.000173978	5.10248e-07	-0.000314686	1.43966e-05	NA	0.000157857	-8.19178e-06	NA	6.11606e-05	-1.62449e-06	-5.56698e-05	0.000365338	-6.28124e-05	-4.69031e-06
-114	-2.55672e-05	1.9942e-05	-7.44844e-06	-0.000150553	NA	-9.96728e-05	-7.70944e-05	NA	-1.53524e-07	-4.14048e-06	-1.58497e-05	-0.000100472	0.000792196	-3.2366e-05
-113	1.81336e-09	-1.12906e-07	-0.000140634	2.86101e-06	NA	-4.57425e-07	-5.47554e-05	NA	0.000187776	7.036e-05	-8.39742e-05	-8.71613e-05	-2.14607e-10	9.32452e-05
-112	-1.11179e-06	7.8464e-06	1.16224e-05	3.45569e-07	NA	-1.41945e-05	-2.99329e-07	NA	-5.4856e-05	5.02635e-08	-0.000192762	9.68233e-05	3.67178e-08	-3.1377e-05
-111	8.16151e-06	0.000703274	9.08455e-08	0.000175788	NA	-0.000128798	-1.27559e-07	NA	-0.000334157	-2.70823e-06	0.000402802	-4.62577e-07	1.96272e-06	-6.38906e-05
-110	4.52927e-05	-5.83419e-05	0.000107557	9.88474e-06	NA	-4.1687e-05	-0.000408378	NA	6.91123e-05	-3.44375e-05	-2.1363e-08	-4.13217e-06	-1.14392e-05	1.7837e-05
-109	0.000381741	1.41939e-05	0.000424663	0.00019641	NA	-1.39675e-05	0.000201331	NA	-1.05744e-06	1.25776e-06	-8.75993e-05	4.51408e-05	-8.88867e-05	-3.12967e-05
-108	-9.23322e-06	-0.000425937	2.88697e-06	-1.6383e-06	NA	4.32785e-05	-1.6456e-05	NA	5.63443e-05	-1.60521e-06	-0.000119602	-1.00467e-05	7.34353e-05	0.00015461
-107	-0.000112039	2.35404e-07	-4.08962e-05	-0.00011361	NA	-0.000334471	0.00020073	NA	1.85729e-05	-2.50681e-06	4.6174e-05	3.39815e-05	2.62392e-06	2.69125e-05
-106	0.000373608	-9.4257e-05	1.47326e-05	-2.76523e-05	NA	-2.4027e-05	2.88494e-08	NA	-3.41704e-05	-7.69269e-07	-2.12281e-07	2.70032e-05	-5.75971e-05	2.70549e-05
-105	-8.65818e-05	-1.03568e-06	-0.000117738	6.53934e-06	NA	-3.68094e-06	0.000384468	NA	0.000294936	1.86079e-05	-8.88355e-05	3.97807e-05	0.000223265	9.2457e-05
-104	-7.35495e-05	0.00048573	0.000249027	3.58593e-05	NA	3.19548e-05	0.000292251	NA	2.29966e-05	-1.16731e-05	-2.73208e-05	0.000105414	-1.46065e-05	8.83743e-05
-103	-2.26462e-05	-4.11573e-05	3.43969e-06	-8.56338e-05	NA	9.41986e-05	-0.000621494	NA	2.93915e-05	1.11296e-05	4.06904e-05	4.97816e-07	-1.79306e-05	-0.000152699
-102	0.000296517	0.000437832	8.98516e-05	0.000176748	NA	-0.000465853	-2.62809e-05	NA	3.14713e-05	-3.12233e-06	-1.24908e-06	5.5173e-05	0.000344931	-6.64679e-06
-101	0.000108728	2.07616e-06	7.16555e-05	-0.000220397	NA	4.34803e-05	0.000160274	NA	-3.02231e-05	1.14896e-05	-0.000169148	-0.000100097	0.000340615	-1.5493e-06
-100	0.00018984	1.91993e-05	-8.08221e-05	7.68147e-05	NA	9.14502e-06	-1.31073e-06	NA	0.000566312	-1.18551e-05	8.89751e-05	-0.000403854	-1.58805e-05	-7.13321e-05
-99	-6.74175e-06	5.68698e-05	2.12407e-05	0.000260285	NA	3.24371e-05	-5.57428e-05	NA	0.000193708	-2.34249e-05	6.92387e-05	0.000288216	4.53542e-05	4.95825e-05
-98	7.3647e-05	0.00152812	0.000133591	4.47617e-06	NA	3.85974e-05	1.01227e-06	NA	-8.13993e-06	2.09099e-05	-7.99841e-06	-2.22607e-05	-3.52462e-05	7.39926e-05
-97	4.4856e-05	-0.000272106	0.000136363	1.16498e-05	NA	8.43291e-05	-0.000201814	NA	0.000371118	8.7635e-06	5.88289e-06	5.99801e-05	-2.65468e-05	-5.443e-05
-96	-0.000111555	-4.09732e-06	-6.41145e-06	-5.70144e-05	NA	2.83637e-05	-0.000177854	NA	-9.10901e-06	7.47983e-06	-3.76426e-05	0.000109243	0.000622515	8.77498e-05
-95	7.54735e-05	0.000309363	8.76166e-06	-2.17111e-06	NA	-0.000192882	-3.84787e-07	NA	0.000174586	-2.42677e-06	-0.000426064	2.1011e-05	0.000151511	-1.6626e-07
-94	0.000975075	-3.56663e-06	0.000257133	0.000242356	NA	3.10795e-05	-1.68255e-07	NA	-7.37494e-06	-1.03743e-05	0.000461176	-2.24719e-05	0.000130287	2.99331e-05
-93	-0.000317461	0.000391277	-0.00105398	0.00048137	NA	0.000514467	-0.000408715	NA	0.000318146	-3.56854e-07	-3.29645e-07	7.08702e-05	-9.40939e-06	-0.000365302
-92	-0.000141569	6.15089e-05	-0.000303496	-0.000183756	NA	-2.77695e-05	3.72291e-05	NA	0.000219936	-5.73691e-05	-0.00023164	4.5792e-05	0.000216185	-0.000201346
-91	-4.27949e-07	-8.82771e-06	-1.4002e-05	-0.000268253	NA	7.89628e-07	0.00039715	NA	-3.3269e-05	8.04835e-05	4.97694e-06	-5.70412e-05	-0.000148864	-6.46129e-05
-90	4.43707e-05	9.8302e-05	-1.02695e-06	4.03506e-06	NA	6.5432e-06	1.02468e-05	NA	-3.0953e-05	2.52165e-05	0.000209405	9.67051e-05	2.88299e-05	8.0511e-06
-89	1.19184e-05	0.000776904	6.23845e-07	1.73034e-05	NA	3.31803e-07	9.74064e-05	NA	4.59784e-05	-2.96622e-06	3.06675e-06	0.000186833	1.57908e-05	-0.00188519
-88	-1.32572e-05	0.000743194	-4.03341e-05	-4.16763e-05	NA	-0.000194447	0.000187045	NA	1.93073e-06	1.50715e-05	2.14469e-05	0.000358413	0.000186394	4.22977e-05
-87	-0.000101828	0.00112346	-3.10702e-06	-0.000143021	NA	5.61893e-05	0.000162349	NA	2.62069e-08	5.72481e-05	7.72889e-05	2.71872e-05	0.000360114	0.000277002
-86	1.01328e-05	0.000779293	-0.00107355	-3.78677e-06	NA	-0.000250738	0.000125543	NA	-0.000226977	5.49532e-05	-0.000443024	0.000508344	1.19932e-05	-0.000158605
-85	-2.10439e-05	-6.84783e-10	5.77097e-05	4.28192e-06	NA	7.57428e-05	7.00345e-06	NA	8.22938e-06	-4.12308e-06	0.000128743	0.000530001	-0.000261373	-2.56599e-05
-84	0.000286859	7.22153e-05	3.20312e-05	-5.8368e-05	NA	7.90722e-06	-0.00105729	NA	0.000460851	-4.16975e-05	1.30887e-05	9.83836e-05	7.60841e-05	9.94816e-05
-83	1.26911e-05	2.37074e-05	5.11778e-05	-3.97193e-06	NA	-7.92703e-05	-3.97293e-06	NA	-2.38338e-05	2.34585e-05	4.52826e-05	1.46801e-05	-4.9731e-05	-0.000120755
-82	0.000447574	0.000264398	-6.18245e-05	3.23947e-05	NA	0.000301042	2.74859e-05	NA	8.17146e-06	-3.95217e-06	-3.94394e-05	-7.756e-05	5.47291e-06	2.24966e-08
-81	0.00016688	-9.14394e-06	6.10811e-06	-2.70316e-06	NA	9.67631e-07	-0.000182658	NA	3.59493e-06	1.01437e-05	-5.04675e-07	-7.96856e-05	5.49403e-05	0.000200876
-80	-3.08059e-06	7.89043e-05	2.01642e-07	-1.93342e-05	NA	-1.63698e-05	0.000106613	NA	0.000288272	-8.03683e-06	5.17611e-05	-6.02632e-05	-9.48207e-05	1.76966e-05
-79	-9.57162e-05	5.03932e-05	-8.41395e-06	-3.43381e-06	NA	-3.98034e-05	-7.2301e-06	NA	7.15715e-05	3.02406e-06	6.78319e-06	0.00102175	3.25423e-05	-1.53037e-06
-78	-7.50291e-05	2.69822e-05	0.000226043	-7.95799e-06	NA	-8.66229e-07	2.92835e-05	NA	0.000666645	7.04476e-06	-2.0355e-05	0.000467901	0.00026818	0.000174773
-77	4.40541e-06	-3.84892e-05	0.000147282	0.000128809	NA	-8.06476e-05	-0.000124008	NA	0.000346745	6.83889e-05	3.36273e-08	1.17576e-06	-0.000146211	9.01535e-05
-76	-6.66832e-06	-0.00106482	6.53659e-05	9.7625e-05	NA	-1.68956e-05	-0.000119186	NA	0.000182579	4.22986e-05	9.17989e-06	0.000262645	2.02288e-05	-1.50844e-05
-75	-0.000212954	-2.93991e-06	0.00012382	-4.3501e-06	NA	-1.25458e-06	5.2333e-05	NA	0.000386043	1.14842e-07	-3.38114e-05	0.000310273	0.000158981	3.38563e-05
-74	4.47671e-05	-3.33683e-05	1.31607e-05	-4.41567e-05	NA	-9.34193e-06	0.000351467	NA	1.01919e-05	4.26406e-06	0.00010856	0.000176498	5.0036e-05	7.08764e-05
-73	-7.11834e-05	0.000157327	1.16625e-05	-0.00015802	NA	-8.45156e-05	-4.58494e-05	5.23568e-07	0.000524085	-1.26338e-05	-0.000220849	-0.00010077	7.11154e-09	-0.000128867
-72	2.84359e-05	0.000440954	7.94373e-05	1.19264e-07	NA	4.35219e-05	-1.78533e-05	0.000426307	0.000532886	-1.81949e-05	0.000472814	0.000804315	0.000281102	0.000100953
-71	3.85309e-06	0.00103967	-1.60534e-05	-6.96026e-05	NA	-5.16908e-05	-9.44437e-06	-0.000167824	0.000535137	-2.52567e-05	1.07524e-07	0.000396684	0.00144219	2.16268e-05
-70	5.4682e-05	0.00101205	-0.000443443	0.000376864	NA	0.0001558	-0.000111525	1.3608e-05	2.22634e-05	1.05155e-06	8.97931e-05	0.000184828	0.000585737	7.72289e-05
-69	0.000238542	0.00138356	4.30148e-05	-2.28714e-05	NA	0.000258984	-2.01031e-05	0.00049012	6.57579e-05	-1.14924e-05	-1.68544e-05	0.000382519	2.07391e-06	-0.000199842
-68	-0.000101388	0.000369165	3.03874e-06	-4.89581e-05	NA	0.000596659	-0.000224751	0.000123281	5.67105e-05	-1.23509e-05	1.72535e-06	0.000514014	5.83384e-05	2.52159e-09
-67	-3.5058e-05	-5.23104e-05	-2.62749e-05	-7.44418e-08	NA	1.84235e-05	0.000323405	0.0006185	0.000232836	-5.94989e-06	-4.06003e-06	-0.000273951	0.00169676	0.000320841
-66	1.22801e-05	0.000152708	0.000438594	-1.0258e-06	NA	4.66628e-05	2.41758e-05	0.000647585	0.000197677	7.67037e-08	6.18639e-05	0.000217396	0.000249352	2.87548e-05
-65	0.000700166	0.000226361	0.000140248	2.45359e-07	NA	7.15036e-07	6.41505e-05	0.000569515	0.000662532	-4.09094e-05	-0.000915693	1.72329e-05	0.000637761	2.13981e-05
-64	-0.000206999	0.000293131	0.00049957	6.49024e-06	NA	1.69604e-05	-0.000189538	0.00111336	1.81471e-05	3.26513e-05	0.000111262	7.14226e-05	9.28715e-05	-1.90398e-08
-63	3.45533e-08	0.00017281	3.53465e-05	-0.000223774	NA	0.000320262	-2.68574e-06	0.0013443	5.81396e-05	-4.47848e-08	0.000224324	4.15198e-05	0.000521743	3.20231e-05
-62	-2.60503e-05	0.000285903	0.000293876	-4.68157e-05	NA	7.70909e-05	-8.93362e-05	-9.8563e-05	-7.41149e-05	6.38647e-05	0.000342469	0.000875644	0.00117881	9.0085e-05
-61	1.15938e-05	0.00326062	-0.00030796	-3.89352e-05	NA	-4.6946e-06	7.03608e-05	-3.74638e-05	0.000193281	4.29496e-06	3.66054e-05	0.00088968	0.00193791	5.03269e-05
-60	-0.000278491	0.000518613	5.29769e-09	-6.56422e-05	NA	0.000123073	-0.000115984	8.94165e-05	0.000339966	-1.20183e-06	0.000137682	5.04181e-06	0.000493912	-1.41845e-06
-59	1.62469e-05	0.000983482	-0.000131946	1.91456e-05	NA	0.000363171	9.37933e-06	6.93695e-05	0.000214803	-7.23879e-06	-0.000240025	0.000164152	0.000502004	0.000192037
-58	-0.000137188	0.00442721	1.45844e-07	-4.80666e-05	NA	5.83641e-05	0.000815353	4.06146e-05	-0.00102119	9.18001e-06	-2.13214e-05	0.00026358	9.47702e-06	0.000174785
-57	-0.00010864	0.00209763	1.42503e-06	0.000274847	NA	-6.29616e-05	0.000323918	-0.000182523	-6.21888e-06	-1.25461e-06	-3.51466e-05	0.000314553	0.000359023	0.00026165
-56	0.00024002	0.000126845	0.00311524	0.00120154	NA	0.000684937	-1.50244e-05	0.000574989	8.25082e-06	-5.97352e-05	0.000116269	9.98681e-06	-2.31379e-05	2.41926e-05
-55	-6.6586e-05	0.00124126	-0.0016235	0.000647923	1.07492e-05	1.66478e-05	-7.01587e-06	0.00113616	-4.15466e-05	9.95691e-06	-2.6596e-08	0.000115992	1.1781e-08	-8.81105e-07
-54	3.46657e-05	7.81085e-06	0.00283894	0.00024371	5.8601e-05	0.000108512	-8.65102e-07	0.000671055	-3.22837e-06	-6.13881e-06	0.000464644	0.000285653	1.21475e-05	0.000111505
-53	1.15684e-06	0.000428657	0.00121959	0.00187247	-0.000172322	0.000249037	3.87349e-05	0.000858619	-0.000291455	-1.95877e-05	-8.9144e-07	0.00055225	3.12204e-05	-0.000159286
-52	0.000150531	0.00043751	0.000510564	0.00136528	1.07473e-07	3.30181e-05	-8.97513e-06	-0.00077159	0.000123097	3.74354e-05	-1.28328e-05	8.47162e-05	1.19162e-05	0.000140234
-51	-0.000273841	0.000194073	0.00111019	0.00113197	0.000127564	2.36548e-05	-1.06085e-06	-0.000428675	-5.35331e-06	6.99606e-06	-1.88489e-05	2.70398e-05	8.36173e-06	0.000142114
-50	-3.38214e-05	0.00134651	0.00107534	0.00188732	-3.42549e-05	1.06997e-05	-1.37578e-08	5.96843e-05	-1.38731e-05	-3.30806e-05	6.04823e-07	0.000133083	5.01746e-06	-6.26838e-06
-49	-1.56545e-05	0.00158448	0.000657414	0.00241844	1.75786e-06	1.23462e-05	3.03966e-07	0.000237743	3.09412e-06	-1.71842e-06	-7.08928e-05	0.000483524	0.0011055	2.50935e-05
-48	0.000469791	0.000447186	-1.62436e-05	0.000158584	0.000187271	0.000154832	0.00024069	0.000525932	9.69421e-05	1.20704e-05	0.000132227	0.000197534	-0.000104967	-1.34838e-06
-47	-2.05088e-05	-0.000155404	-0.000460057	0.000317404	0.000684587	-6.36771e-06	6.79938e-05	-0.000424759	0.000192354	1.64254e-05	0.000177941	-0.00100183	-0.000142157	0.000165375
-46	-3.45839e-05	2.15196e-05	8.60695e-05	4.47446e-06	0.000554362	0.000613441	0.000362356	-2.43147e-05	0.00176932	-1.7002e-06	-2.48917e-06	0.000117741	0.00178071	8.1585e-08
-45	-9.70398e-05	1.58168e-05	0.000201264	-0.000128353	0.000547284	0.000159676	-5.19254e-05	-0.00017125	0.000837421	-5.71358e-06	-9.60733e-06	-8.00611e-06	0.00071739	0.000100124
-44	-0.000326007	0.000675362	1.2494e-06	-6.12475e-06	0.000186091	0.00010312	1.02182e-06	5.71444e-06	0.00193094	1.17635e-06	-1.13548e-05	0.00106164	0.000308287	-4.47665e-05
-43	0.000852521	-0.000445073	0.000407178	4.9621e-05	0.000891808	6.45586e-07	2.51777e-05	4.78502e-05	0.00169166	-3.13267e-05	0.000496458	-4.66884e-05	3.71098e-06	-9.64359e-06
-42	-2.08774e-05	-2.11303e-05	5.86194e-05	0.000776682	0.000764522	4.20443e-05	-0.000197627	2.9292e-05	0.00150254	9.38125e-05	1.18239e-07	5.05114e-05	0.000657218	7.46515e-05
-41	0.000116656	0.000252012	0.000137656	-4.67371e-06	0.000528513	0.00021203	0.000404511	6.69697e-05	0.00109647	-9.3272e-08	3.33924e-06	0.000440512	6.30986e-06	-2.14546e-05
-40	-9.1683e-05	-5.11148e-05	-0.00100493	2.18936e-05	0.000374581	0.000165654	-4.74758e-05	7.68678e-05	0.00060568	-9.09744e-06	0.000300208	-7.79124e-06	-2.94436e-05	0.000140979
-39	-4.06047e-05	0.0014204	0.000132538	0.000133757	0.000128189	3.51385e-05	-0.00349689	9.27971e-05	-8.19871e-05	1.37442e-06	-8.31048e-07	2.78806e-05	0.000397709	-1.04654e-08
-38	1.30192e-05	2.9948e-06	0.000655193	-0.000415881	3.84539e-07	0.000138549	0.000878537	1.53674e-05	0.00012227	6.2995e-06	-6.14335e-05	0.000508602	2.96244e-07	-6.39885e-05
-37	-2.84769e-05	0.00217812	-0.00311145	2.36757e-05	3.50014e-06	-0.000169291	0.00160789	8.21412e-05	-1.87436e-07	-1.15649e-05	-6.21321e-05	0.000574268	2.85179e-05	0.00044373
-36	0.000180666	-0.000883402	4.42007e-05	0.000869226	-0.000105126	-6.54957e-06	0.00123934	5.97944e-05	0.000240293	8.65506e-05	-5.6512e-05	0.00031508	0.000264697	-0.000245216
-35	0.00614169	9.87107e-06	-3.7271e-05	0.00120391	-8.32099e-05	-0.000190561	0.00126388	0.000389693	-4.39413e-06	1.67333e-05	1.84261e-05	0.00102382	0.00261199	8.55504e-05
-34	0.00264845	0.000941673	-7.99018e-06	0.00159101	-0.000403298	0.000503507	9.61215e-06	0.00212907	-0.00134785	-2.71346e-05	-0.000198003	0.000519614	0.000321892	-3.63181e-05
-33	0.00260133	1.711e-06	-0.00123806	0.000243578	-0.000143937	0.000467917	-0.000388266	0.00103281	-0.00110169	-0.000308394	6.72381e-05	0.0014425	0.000567432	0.00020225
-32	0.00192836	0.000206287	0.00234125	0.000287214	-7.9978e-05	0.000164258	0.000159626	4.11154e-06	-0.000666349	-8.05633e-05	-0.000161248	0.000425044	-0.000107509	-8.49124e-05
-31	0.00236557	0.000545358	-0.000386501	0.000167191	-0.000585482	4.28845e-05	0.000332744	0.000807929	-0.00019747	-0.000192133	-9.13373e-06	-0.000183912	0.000100325	7.6886e-06
-30	-0.000352457	0.000312391	0.000461928	0.000645218	-1.25965e-05	1.17659e-07	0.000144443	6.10688e-05	0.000114056	3.9503e-06	7.43393e-05	-0.000418123	0.000488564	3.01517e-05
-29	-0.00019455	0.000433634	7.66648e-06	8.55036e-05	-7.3691e-05	-8.42252e-05	5.08472e-06	0.000768618	-0.000555698	4.95726e-05	5.35293e-06	-1.9066e-06	0.000877467	-2.96473e-05
-28	0.000280641	7.09682e-05	0.000363577	-2.13658e-05	-8.9418e-05	-0.000101524	6.04744e-05	-0.000186945	-0.000447367	6.56777e-06	5.78983e-06	7.33013e-05	-3.49167e-05	-0.000101007
-27	3.8108e-06	-3.26679e-05	-0.000618951	0.000563121	-0.000274513	3.68015e-05	-0.00011738	0.000169139	7.45025e-05	-4.111e-05	-1.647e-06	0.000412536	0.000592484	-1.64209e-05
-26	-0.000214584	0.000256349	-4.50773e-05	0.000425819	-0.00155634	-1.18759e-05	-5.55485e-05	9.57957e-05	-0.00063593	4.84518e-08	0.00010823	-2.47437e-05	9.12681e-05	-4.13377e-05
-25	-1.77461e-06	5.04942e-05	1.12291e-06	3.02171e-06	-0.000375769	2.57227e-06	7.31844e-07	0.000204232	-0.000362197	-4.28286e-05	-3.84492e-06	0.000166998	-0.00119154	3.76982e-06
-24	-0.000171318	1.06852e-05	0.000375168	0.00013353	-1.23795e-06	0.000158556	0.000360176	9.39246e-06	-0.000548489	-3.88897e-09	-3.96323e-05	5.89927e-05	-0.000297241	2.73896e-05
-23	-7.14728e-05	1.24962e-06	-6.29956e-06	3.74958e-05	1.01219e-05	7.56707e-06	-0.000411481	0.000209091	0.00157522	-3.31902e-07	9.91709e-05	1.18962e-05	-7.35174e-05	2.20459e-06
-22	-0.000245006	-0.000593039	-8.69944e-06	-0.000134106	8.72251e-06	0.000106686	9.54132e-05	-0.000103855	0.00188515	1.48181e-06	-4.34037e-05	3.5753e-05	5.59193e-06	-0.000122733
-21	-4.79375e-05	-9.93356e-05	0.000135675	4.96746e-05	-2.99787e-05	5.01601e-05	7.69611e-06	2.8653e-05	0.00048735	7.1273e-06	1.92533e-05	0.000258454	-8.79493e-06	-2.42895e-05
-20	0.000232355	2.83109e-05	1.29275e-06	0.00218292	0.000180311	0.000457194	1.12334e-05	2.44823e-05	-0.000173928	3.59896e-07	-5.7332e-05	3.66071e-07	-1.46903e-05	-1.05263e-08
-19	9.99163e-07	-0.000210965	-1.03267e-07	0.000527349	4.17699e-05	-9.23112e-05	3.85994e-05	2.78225e-05	0.00203999	5.98569e-07	2.26936e-05	-8.36387e-06	0.000111316	3.86173e-05
-18	-3.53754e-05	-4.16413e-05	-8.16265e-05	0.000580903	3.13012e-05	-0.000179605	-3.4809e-06	6.27411e-05	0.0023268	-1.23564e-05	8.92223e-05	0.000405031	-2.09642e-08	0.000524435
-17	-4.28352e-05	-2.04192e-06	-0.000182491	-0.00214464	-2.02375e-05	8.11218e-07	3.23641e-05	1.99529e-05	-6.94089e-05	8.94859e-05	-3.47111e-05	-2.12243e-06	1.96183e-05	-2.09119e-06
-16	-0.00011457	-2.90762e-05	-0.00046204	-0.00145195	5.33119e-05	0.000395525	0.000899042	7.54561e-05	6.09951e-07	-6.33363e-08	-2.35512e-07	-0.000104304	-0.000268203	0.00032533
-15	4.53385e-05	-0.000239513	1.32123e-05	-0.00102606	4.825e-06	3.37138e-05	8.96574e-05	2.75736e-05	0.000128095	-4.1992e-07	7.68401e-05	0.00027944	0.000340497	0.000511468
-14	2.48834e-06	0.00220431	0.00013037	-0.00284162	4.6164e-06	-0.000198928	2.62253e-05	-1.19662e-05	-0.000357642	-3.35887e-05	6.82691e-07	8.78168e-06	0.000381459	-0.00115275
-13	-0.000801527	0.00205695	7.72483e-06	-0.00261768	2.23607e-06	-0.000307661	0.000751706	2.28975e-06	0.0002314	-4.51159e-05	0.000159995	4.53495e-05	0.00114381	0.000101703
-12	0.00223014	-3.56459e-09	-0.000122543	-0.000255347	4.99679e-06	0.000178483	0.00028149	-0.0013063	-0.000102703	-8.5688e-05	-0.000506746	9.03225e-05	-0.00031806	0.00153933
-11	0.00367152	0.000464197	-1.21021e-05	-0.000725108	-3.0873e-06	0.000939349	0.000712178	5.22173e-06	-0.000471274	-9.45744e-05	-4.9936e-05	7.81792e-06	1.8906e-06	5.21785e-05
-10	0.000585347	-0.000167251	3.84054e-05	-0.000209951	-4.13784e-06	-4.2222e-05	4.05204e-06	0.000656014	-4.8247e-05	0.000259123	-7.28917e-05	6.65424e-06	-4.4122e-06	-0.00189373
-9	5.8029e-05	0.00452621	2.22732e-05	-0.000572416	-8.20438e-05	-0.000139569	0.00012296	0.00179756	-0.000880735	-0.000131804	7.80267e-05	-0.000320903	0.000136596	-0.000176699
-8	4.92074e-05	0.000230449	-0.000419134	-4.58721e-05	-3.1183e-05	0.000233479	-0.000508168	0.000360624	-4.85072e-05	-8.03224e-05	-5.43059e-05	0.000682158	-0.000189046	-2.3639e-06
-7	0.00416865	-2.3592e-06	3.75215e-05	6.66871e-06	0.0004361	-4.73212e-05	1.37005e-05	-0.000384349	-8.55249e-05	-0.000207372	-6.17142e-07	0.000332577	0.000175883	-0.000419608
-6	-0.000461586	2.60981e-06	1.97158e-05	0.000223225	0.00111565	-3.74171e-05	-0.000649842	-0.00017753	-0.000163569	-6.1241e-05	-1.35787e-05	-2.92597e-07	8.43103e-05	1.55024e-06
-5	-0.000518599	0.000118876	0.000111434	0.00038564	-0.00101224	-3.94891e-05	0.000293298	0.0013797	-0.000326244	-9.30971e-05	-7.46249e-06	0.000260858	5.79177e-07	-0.000512908
-4	1.24002e-05	-1.68281e-05	-0.000148153	-1.73945e-05	0.000193299	6.4226e-06	1.67969e-05	-8.57813e-05	7.11719e-06	0.000532703	0.000330038	0.000276977	7.35026e-06	-1.23912e-06
-3	-0.0016893	-1.2358e-07	-7.43134e-05	-6.3605e-05	-0.000311765	0.000120502	-0.000101204	6.17064e-05	-0.00100333	0.000466048	-0.00100054	-0.000327651	-7.11104e-05	-0.000380858
-2	-0.000130747	-3.75085e-07	0.000531724	1.85244e-09	0.000994913	3.23754e-05	-6.99638e-05	-3.78592e-05	-3.05496e-05	0.000173605	0.000115675	5.55522e-05	0.000157531	-0.000250377
-1	-1.79547e-05	0.000110533	7.45944e-05	0.000313634	0.00011293	-0.00014204	-1.08541e-05	5.17159e-05	-4.40261e-05	0.000446717	-0.000153999	9.19258e-05	4.47698e-05	5.0236e-07
0	-7.36704e-05	-0.000187124	-8.4145e-05	-0.000873388	NA	0.000131158	-0.00171674	NA	-0.000289974	0.000151649	-2.0556e-05	1.87998e-06	6.16004e-05	-0.000165966
1	-0.000584884	1.05735e-05	0.000139061	0.000554973	NA	-2.90767e-05	-0.000318877	NA	-0.000525386	0.000416764	0.000101498	3.78532e-05	0.000164116	-1.09541e-05
2	-0.000905895	-1.14907e-09	-0.000217766	-0.000790246	NA	-0.000100034	-0.000575372	NA	-5.49808e-05	0.000541939	0.000236522	-5.0766e-06	3.69583e-06	7.11674e-07
3	-1.63486e-05	0.000457814	7.82837e-05	0.000537728	NA	-3.55032e-05	-7.04894e-05	NA	-6.18956e-05	0.000499074	-9.04111e-05	4.03875e-05	0.00038729	0.000245433
4	-0.000107403	-1.00251e-06	8.97337e-05	0.000513211	NA	-0.000168524	-0.000300658	NA	-0.000217973	0.000477838	4.69387e-05	-0.00101319	-0.000400129	1.20329e-06
5	-0.00121416	0.000154406	-0.000151219	0.00469955	NA	-0.000219047	-0.000144424	NA	-0.000172411	0.000307663	2.6806e-05	-0.000111291	3.55767e-07	9.29183e-06
6	-0.0010871	0.000142956	0.000174414	-0.00120305	NA	-5.48826e-05	3.18e-05	NA	5.36212e-06	0.000144324	-0.000213866	0.000354561	0.000263294	-8.77231e-06
7	5.04056e-05	0.000146238	-0.000582721	0.000880963	NA	3.19403e-05	3.301e-05	NA	-0.000565468	0.000218591	-2.08402e-05	0.000873567	-5.85043e-06	-0.000165706
8	-9.87895e-05	0.000223331	-0.000349244	-0.000204814	NA	0.00043301	0.000543824	NA	-0.000176481	0.000210428	0.000276578	-0.000442376	-8.86016e-07	-0.000176472
9	-0.00052726	-0.000139331	6.29433e-05	0.000287936	NA	1.21094e-05	2.11921e-05	NA	-0.00123743	0.000576965	1.65825e-05	0.000527839	0.000132422	-2.85066e-07
10	-0.00040798	2.49695e-05	1.96507e-05	7.41946e-05	NA	0.000171809	-0.000128964	NA	-1.431e-07	0.000301684	-5.82116e-06	0.00023658	-1.00253e-06	3.60179e-05
11	4.43232e-05	4.6629e-07	-1.0232e-05	-1.99295e-06	NA	-0.000247005	0.000470598	NA	-2.83405e-05	0.000289199	-7.84883e-05	2.14388e-05	0.00012726	6.42562e-05
12	-2.1156e-06	-0.000292387	-1.20109e-05	6.42456e-05	NA	-0.000183483	1.4336e-05	NA	-0.000116884	0.000539669	-0.000616048	-4.06205e-05	-1.35839e-05	1.44989e-06
13	-1.80181e-06	0.000143357	-4.21367e-05	1.26237e-05	NA	-0.00011108	0.000155798	NA	-3.12061e-05	0.000220201	0.000668435	0.000756264	0.000227217	4.1102e-05
14	-4.79014e-07	5.55807e-05	8.82323e-06	-8.1936e-06	NA	-2.61451e-05	-4.82228e-05	NA	-0.00037791	0.000249032	0.000772075	3.53019e-06	-2.61708e-05	0.000136497
15	3.14627e-05	9.79619e-05	-0.000801295	3.03769e-06	NA	-8.31983e-06	-0.000329725	NA	-8.20915e-05	0.000737188	0.00158759	-5.86067e-05	-7.04163e-05	-0.000118133
16	1.09905e-05	8.48095e-05	0.000149637	-2.4932e-05	NA	-0.0016654	0.000138688	NA	-0.000319838	0.000642746	0.000320345	2.15166e-05	0.000290895	-3.52754e-07
17	0.000344746	0.000328664	-0.000265185	0.000235009	NA	0.000221011	3.12497e-05	NA	-2.30678e-05	0.000129501	0.000402237	-3.49814e-07	2.80793e-05	2.15408e-05
18	0.000130865	3.71445e-06	-5.35114e-05	-5.31203e-05	NA	0.000199651	3.30239e-05	NA	4.9711e-05	9.50845e-05	-0.00137668	-4.75906e-06	-0.000493983	5.9003e-05
19	-3.20363e-06	0.00032501	-2.50796e-06	-2.05013e-07	NA	-1.04963e-05	8.03518e-05	NA	5.99039e-05	6.53752e-05	0.000647685	8.01398e-06	7.07614e-05	2.75374e-06
20	3.4728e-05	0.00017202	-6.4135e-05	-0.000118939	NA	0.000153263	-0.000143504	NA	-0.000277053	1.25668e-05	-9.12318e-06	1.43717e-05	-0.000136443	-9.02357e-05
21	2.76627e-05	1.2537e-07	2.17141e-05	2.76113e-07	NA	1.05615e-05	-0.000122719	NA	-7.23527e-05	7.01488e-06	-2.95229e-05	-0.000375212	8.98268e-05	-4.83183e-05
22	-6.7639e-05	0.000104215	1.03001e-06	-4.39785e-06	NA	1.1818e-05	0.000135874	NA	5.37039e-08	4.19589e-05	2.36567e-05	2.08669e-07	-0.000655967	-7.82576e-05
23	2.3326e-08	1.29168e-05	-1.67833e-06	-0.000201708	NA	1.12137e-06	0.000110675	NA	-8.13791e-06	-9.8143e-06	-1.89304e-05	0.000236847	0.000162385	-2.83701e-05
24	1.69794e-09	7.57701e-05	7.9399e-08	0.000296202	NA	-4.19292e-05	0.00027718	NA	-0.000282721	-3.53426e-05	4.88365e-05	-2.51413e-06	0.000235148	1.51313e-05
25	0.00023351	-3.66709e-05	2.71777e-06	-1.6558e-05	NA	1.93401e-06	-0.000247011	NA	8.1439e-05	-1.72562e-05	-6.45635e-05	5.09472e-05	-7.9943e-07	-2.47707e-10
26	0.000259784	0.000126261	-5.63815e-06	-0.000116111	NA	1.32325e-05	-1.30012e-08	NA	-0.000514106	5.0563e-06	-7.43768e-05	1.60875e-05	-0.000176573	6.62063e-05
27	0.000168595	-0.000448981	7.77584e-06	2.76844e-05	NA	1.44498e-05	0.000131931	NA	-5.2356e-07	1.55774e-05	3.16226e-05	7.7718e-07	0.000241868	3.4916e-05
28	0.000253773	0.000154112	-4.56469e-05	2.80126e-06	NA	-0.000104625	-9.58572e-05	NA	-0.00017157	1.32263e-05	0.000261956	-0.000123402	-6.66556e-05	3.4608e-05
29	-2.77546e-05	0.000157485	-7.8778e-06	-4.02583e-06	NA	-7.26144e-06	-2.65122e-06	NA	4.55893e-06	-1.26857e-05	2.15866e-06	8.84384e-06	-0.000166807	-5.01307e-06
30	0.000101839	7.72395e-06	3.47182e-05	0.000219178	NA	-6.39793e-05	3.64497e-05	NA	-4.71231e-05	4.81108e-06	0.000227128	2.16108e-05	-0.00047124	0.000249869
31	5.55859e-08	-2.80576e-05	2.84257e-05	-2.24877e-05	NA	-8.37114e-05	-0.000168861	NA	-0.000181675	-3.13516e-06	-6.33779e-06	0.000255377	-0.000159472	3.60972e-05
32	0.000500777	6.38159e-05	0.000295804	3.04523e-05	NA	0.000192535	0.00038941	NA	-4.4325e-06	-2.67605e-06	-0.00130105	0.000124641	1.68418e-06	7.26229e-05
33	3.78895e-05	6.13518e-06	0.000111003	0.000358275	NA	0.000338149	0.000242656	NA	-5.40824e-06	1.89842e-05	-0.00146878	0.000101063	0.000318712	1.01984e-06
34	7.56513e-05	-0.000183746	-9.24666e-07	0.000117689	NA	-0.000206126	-1.7183e-05	NA	-4.2698e-05	-7.9427e-07	-0.00258308	-4.5924e-07	-3.63874e-05	-3.93802e-05
35	0.000171325	8.68215e-05	-0.000488396	0.000132454	NA	-0.000390473	-4.49367e-06	NA	9.3497e-06	-1.78833e-06	0.00164917	4.5191e-05	-1.0764e-05	9.18074e-05
36	-0.000201868	-2.09023e-05	0.000401624	2.23123e-06	NA	1.94974e-05	2.94574e-05	NA	2.48948e-09	-4.00225e-06	0.000559148	4.55801e-05	-0.000401468	-1.23638e-05
37	1.30003e-05	-4.49798e-06	-1.70045e-05	7.69673e-07	NA	-0.00012372	-0.000520892	NA	6.53318e-06	-5.13994e-06	-0.000198247	7.9633e-05	0.000339268	-1.02393e-06
38	8.74253e-05	-9.15703e-05	0.000237064	1.41183e-05	NA	-5.58396e-05	0.000216109	NA	8.4413e-05	2.09946e-06	0.000177924	0.000123322	-0.000139915	-7.38189e-06
39	0.000127286	-3.04103e-05	0.000174909	1.10253e-05	NA	0.00115965	1.9046e-06	NA	2.40904e-05	-1.10457e-05	0.000477409	-9.26132e-05	-4.02773e-06	8.745e-05
40	-1.70537e-05	-7.18273e-05	2.27343e-05	0.000133784	NA	0.000127866	0.000223635	NA	0.000137741	-2.67407e-05	0.00176449	0.000548692	7.40829e-05	0.000425891
41	0.000104366	4.54799e-05	-0.000178342	3.10265e-05	NA	-6.52464e-07	0.000232574	NA	1.989e-05	-1.29145e-05	-0.000229952	0.000133535	0.000673505	2.36197e-06
42	4.15483e-06	3.66087e-09	6.77538e-07	-1.18589e-05	NA	-3.15665e-05	0.00039999	NA	-4.16344e-06	-3.5125e-05	-6.03952e-05	-6.9548e-05	0.000547031	-6.12704e-08
43	-3.06719e-05	-0.000117156	2.10823e-05	-0.000160361	NA	0.000229162	0.00066099	NA	9.13364e-06	-2.01066e-05	-0.00055589	0.000216493	-4.88778e-05	5.46257e-06
44	-6.9004e-05	-4.41644e-06	-0.000165468	-7.12891e-05	NA	-0.000325769	-3.45762e-05	NA	2.03031e-05	1.11976e-05	-7.01979e-05	2.45934e-07	0.000325537	6.81215e-06

## Sheet: TF_locations
gene	growth	feat_num	start	end	type
araC	arabinose	0	-47	-27	rep
dgoR	LB	0	-50	-30	rep
dgoR	LB	0	-37	-28	act
ompR	acetate	0	-113	-94	rep
ompR	acetate	1	-56	-25	rep
ompR	acetate	2	-1	13	rep
