# Supplementary material for: Deciphering the regulatory genome of Escherichia coli, one hundred promoters at a time
Source: eLife. 2020 Sep 21;9:e55308. doi: 10.7554/eLife.55308 (PMC7567609; doi:10.7554/eLife.55308)
Supplement: Appendix 2—figure 4—source data 1. [file elife-55308-app2-fig4-data1.csv]

Query_ID	Target_ID	Optimal_offset	p-value	E-value	q-value	Overlap	Query_consensus	Target_consensus	Orientation
marR_right	marR	0	1.10E-05	0.00104055	0.00205719	13	TTGCCATGGCCCC	TTGCCCAGGCAACT	-
marR_right	rpoD15	0	0.00860818	0.817777	0.443345	13	TTGCCATGGCCCC	TTGACATCCCTTTGAATAGGGTATAAT	+
marR_right	RhaS	0	0.0117632	1.11751	0.443345	13	TTGCCATGGCCCC	TTGAAATTTCGCCGGTA	+
marR_right	rpoD17	0	0.0118026	1.12124	0.443345	13	TTGCCATGGCCCC	TTGACAAATTATTTAGTTTCTGTTATAAT	+
marR_right	rpoD16	0	0.0191589	1.82009	0.596031	13	TTGCCATGGCCCC	TTGACATCTTTTATTTTTTCTATATAAT	+
marR_right	rpoD19	0	0.0222142	2.11035	0.596031	13	TTGCCATGGCCCC	TTGACATTTTTTTTGTTTTTTGTGGTATAAT	+
marR_right	marA	-6	0.0436163	4.14355	0.988512	7	TTGCCATGGCCCC	TGGCACTTTTTGCTAAA	-
marR_right	rpoD18	0	0.0648508	6.16083	0.988512	13	TTGCCATGGCCCC	TTGACAAAGTTATTATTTAACAGGTATAAT	+
marR_right	MntR	-2	0.0800409	7.60388	0.988512	11	TTGCCATGGCCCC	AATATAGCAAAAGCTATGTTT	+
marR_right	ArgP	6	0.081098	7.70431	0.988512	12	TTGCCATGGCCCC	CTTATTGTCTCTTATTGC	+
marR_right	CysB	12	0.0905126	8.5987	0.988512	13	TTGCCATGGCCCC	TTATTATTCCATTTTATTTTTCATTATCCCTTTTTGG	+
marR_right	IscR	9	0.0961498	9.13423	0.988512	13	TTGCCATGGCCCC	TTCACTAATTTACTAGGGTATA	-
marR_right	relBE	11	0.114501	10.8776	0.988512	12	TTGCCATGGCCCC	TGTAAAGACACATGTCAAGACAC	+
marR_right	SoxS	-5	0.124144	11.7937	0.988512	8	TTGCCATGGCCCC	ATGGCACAAATTGTTAAA	-
marR_right	CytR	0	0.159721	15.1735	0.988512	13	TTGCCATGGCCCC	AATAGATTGCATAAATAT	-
marR_right	CsgD	-1	0.186314	17.6998	0.988512	11	TTGCCATGGCCCC	TAACTCACTCG	-
marR_right	FNR	0	0.191861	18.2268	0.988512	13	TTGCCATGGCCCC	TTGATATAAATCAA	-
marR_right	IclR	0	0.27373	26.0044	0.988512	7	TTGCCATGGCCCC	TTTTCAT	+
marR_right	NtrC	-7	0.278519	26.4593	0.988512	6	TTGCCATGGCCCC	TGCACCAAAATGGTGCA	+
marR_right	PutA	-3	0.294656	27.9923	0.988512	10	TTGCCATGGCCCC	AGGTTGCACC	+
marR_right	Nac	2	0.29631	28.1494	0.988512	13	TTGCCATGGCCCC	AATTTATTATGTGAT	+
marR_right	UlaR	6	0.315899	30.0104	0.988512	11	TTGCCATGGCCCC	TTTTGATTAAATTTGAA	-
marR_right	NagC	6	0.32085	30.4807	0.988512	13	TTGCCATGGCCCC	ACTTATTTCGCATCGTGAAATA	+
marR_right	FhlA	0	0.340103	32.3098	0.988512	13	TTGCCATGGCCCC	TGTCCGTTTCGACG	-
marR_right	GadW	6	0.348394	33.0975	0.988512	13	TTGCCATGGCCCC	CTGATTTTAATATTATAATG	+
marR_right	Fis	1	0.362949	34.4802	0.988512	13	TTGCCATGGCCCC	GCTTATTTTTTAAGC	+
marR_right	MelR	2	0.369961	35.1463	0.988512	13	TTGCCATGGCCCC	CATTCCCTGAAACTCAGA	+
marR_right	Rob	0	0.370452	35.193	0.988512	13	TTGCCATGGCCCC	TTAACAATTCGTGCCAT	-
marR_right	Fur	11	0.399116	37.916	0.988512	7	TTGCCATGGCCCC	AATGATAATGATTATCAT	+
marR_right	MarA	-5	0.426475	40.5151	0.988512	8	TTGCCATGGCCCC	ACGGCACAAATTGTTAAAT	-
marR_right	AraC	5	0.441974	41.9875	0.988512	13	TTGCCATGGCCCC	TATGGACTATCTTGCTGTT	+
marR_right	FlhDC	2	0.443076	42.0922	0.988512	13	TTGCCATGGCCCC	GCTTTTTCGGGCGATT	+
marR_right	MetJ	-2	0.445911	42.3615	0.988512	7	TTGCCATGGCCCC	GACATCT	-
marR_right	PdhR	2	0.458814	43.5873	0.988512	13	TTGCCATGGCCCC	AATTGGTAAGACCAAT	+
marR_right	OxyR	4	0.461175	43.8116	0.988512	13	TTGCCATGGCCCC	AGATTATACCTATCACT	+
marR_right	RutR	-3	0.474768	45.1029	0.988512	10	TTGCCATGGCCCC	AGTTGACTAATTGGTC	-
marR_right	OmpR	1	0.489801	46.5311	0.988512	13	TTGCCATGGCCCC	TTATATTTGGTTACATATA	-
marR_right	AgaR	11	0.506115	48.0809	0.988512	8	TTGCCATGGCCCC	CTTTCGTTTTCTTTCTTTT	+
marR_right	GadX	12	0.506115	48.0809	0.988512	7	TTGCCATGGCCCC	TAATGTCTGATTTTTATAT	+
marR_right	CRP	6	0.51783	49.1939	0.988512	13	TTGCCATGGCCCC	ATGTGATCTAGATCACATTTTT	+
marR_right	GalR	7	0.523707	49.7521	0.988512	9	TTGCCATGGCCCC	GTAACCGATTCCACTG	+
marR_right	CpxR	5	0.534555	50.7827	0.988512	10	TTGCCATGGCCCC	TTTACATATTTTTAC	-
marR_right	TyrR	7	0.542682	51.5548	0.988512	10	TTGCCATGGCCCC	TGTAAAGAAAAATTTAC	-
marR_right	GlpR	4	0.5506	52.307	0.988512	13	TTGCCATGGCCCC	ATGTTCGTTATTGATCATTT	-
marR_right	MlrA	2	0.553178	52.5519	0.988512	13	TTGCCATGGCCCC	TTGTACATTTACGTTTTTCTGTACAATTTT	-
marR_right	NarP	0	0.5897	56.0215	0.988512	8	TTGCCATGGCCCC	ATACCCCT	+
marR_right	NarL	-1	0.5897	56.0215	0.988512	8	TTGCCATGGCCCC	TACCCATT	-
marR_right	ArcA	2	0.601719	57.1633	0.988512	13	TTGCCATGGCCCC	TGTTAATAATATGTT	-
marR_right	DgsA	1	0.608308	57.7892	0.988512	13	TTGCCATGGCCCC	ATTAATTTCGAGCTGTAAAATAA	-
marR_right	Lrp	1	0.610698	58.0163	0.988512	11	TTGCCATGGCCCC	AATTTTATGCTG	+
marR_right	TrpR	8	0.624052	59.285	0.988512	8	TTGCCATGGCCCC	TGTACTAGTTAACTAG	-
marR_right	Ada	-6	0.663438	63.0267	0.988512	7	TTGCCATGGCCCC	TTGCGCTTTGATT	-
marR_right	PhoP	-2	0.675949	64.2151	0.988512	11	TTGCCATGGCCCC	TGTTTATCATTTGTTTA	+
marR_right	MetR	7	0.685011	65.076	0.988512	8	TTGCCATGGCCCC	TGAAAAATTTTCATT	+
marR_right	ModE	7	0.696796	66.1957	0.988512	13	TTGCCATGGCCCC	CGCTATATAATTTTGTATATATCG	-
marR_right	Dan	2	0.711982	67.6383	0.988512	5	TTGCCATGGCCCC	AATTAAC	-
marR_right	GalS	-6	0.717248	68.1386	0.988512	7	TTGCCATGGCCCC	TGGAAGCGGTTACAT	-
marR_right	PhoB	7	0.722078	68.5974	0.988512	9	TTGCCATGGCCCC	GACAGTTTTATGACAG	-
marR_right	PurR	9	0.722078	68.5974	0.988512	7	TTGCCATGGCCCC	ACGCAAACGTTTTCCT	+
marR_right	HNS	-1	0.72919	69.273	0.988512	12	TTGCCATGGCCCC	TAATAAAATGAAA	+
marR_right	LeuO	1	0.739025	70.2073	0.988512	13	TTGCCATGGCCCC	ATAACAATTACCACGAAT	-
marR_right	IHF	2	0.744994	70.7744	0.988512	11	TTGCCATGGCCCC	TAATTAATTGATT	+
marR_right	MalT	-4	0.748301	71.0886	0.988512	9	TTGCCATGGCCCC	CTCATCCCCC	-
marR_right	FadR	2	0.752971	71.5323	0.988512	13	TTGCCATGGCCCC	AGTGGTCAGACCAGCT	-
marR_right	GntR	5	0.837462	79.5589	0.988512	13	TTGCCATGGCCCC	GATGTTACCCGTAACAGA	+
marR_right	NsrR	-2	0.844863	80.262	0.988512	11	TTGCCATGGCCCC	AAGATGCATTT	+
marR_right	AsnC	1	0.858786	81.5846	0.988512	11	TTGCCATGGCCCC	TTTTTAATGAAT	+
marR_right	GadE	6	0.861507	81.8431	0.988512	12	TTGCCATGGCCCC	AGGTTTTTATTATTTAGA	-
marR_right	ArgR	10	0.861507	81.8431	0.988512	8	TTGCCATGGCCCC	TGCATAAAAATTCATTTA	-
marR_right	TorR	2	0.91597	87.0171	0.988512	7	TTGCCATGGCCCC	TCTGTTCAT	+
marR_right	NanR	-4	0.933127	88.6471	0.988512	5	TTGCCATGGCCCC	CCTGT	-
marR_right	DeoR	-3	0.937921	89.1025	0.988512	10	TTGCCATGGCCCC	TGCTGTGAGAA	-
marR_right	MqsA	6	0.945891	89.8597	0.988512	8	TTGCCATGGCCCC	AATCACCTAAAAGG	-
marR_right	MqsAMqsR	9	0.94813	90.0723	0.988512	10	TTGCCATGGCCCC	AACTAACCTTTTAGGTGGT	+
marR_right	xylR	0	0.952121	90.4515	0.988512	13	TTGCCATGGCCCC	TTACGAAATTTGGT	-
marR_right	ExuR	3	0.95551	90.7734	0.988512	13	TTGCCATGGCCCC	AAAGTGGTATAACAAAT	+
marR_right	AscG	-2	0.960581	91.2552	0.988512	11	TTGCCATGGCCCC	TTTGTGAAACAAG	+
marR_right	GcvA	9	0.962734	91.4598	0.988512	13	TTGCCATGGCCCC	ATTAGATTATCTAATATGAGTAAT	-
marR_right	RcsAB	4	0.964619	91.6388	0.988512	11	TTGCCATGGCCCC	AGAATTATCCTAAAA	+
marR_right	NhaR	9	0.976908	92.8062	0.988512	6	TTGCCATGGCCCC	ATTCGGATTTTACTA	+
marR_right	XylR	4	0.977424	92.8553	0.988512	12	TTGCCATGGCCCC	ACAATTACGAATTTTC	-
marR_right	NrdR	9	0.97752	92.8644	0.988512	8	TTGCCATGGCCCC	CACAATATATAGGATTT	+
marR_right	UxuR	-3	0.980188	93.1178	0.988512	10	TTGCCATGGCCCC	AATTGGTTAACCACA	-
marR_right	DcuR	9	0.980679	93.1646	0.988512	8	TTGCCATGGCCCC	TTAATTTAATTTTTAAA	+
marR_right	BaeR	-8	0.980679	93.1646	0.988512	5	TTGCCATGGCCCC	GAGCCAATTATGGAGAA	-
marR_right	RelBRelE	-8	0.982574	93.3445	0.988512	5	TTGCCATGGCCCC	AAAACTTGTAAT	-
marR_right	LexA	3	0.984495	93.5271	0.988512	13	TTGCCATGGCCCC	TACTGTTTTTTTATACAGTT	-
marR_right	HipB	0	0.985235	93.5973	0.988512	13	TTGCCATGGCCCC	TTATCCGCTCTAGGGGATA	-
marR_right	Cra	3	0.985723	93.6437	0.988512	13	TTGCCATGGCCCC	GAGCTGAATCGTTTCAGT	+
marR_right	RcsB	4	0.991269	94.1706	0.988512	10	TTGCCATGGCCCC	AGATTAGTCCTAAT	-
marR_right	DnaA	-3	0.992014	94.2413	0.988512	10	TTGCCATGGCCCC	ATTTATCCACA	+
marR_right	SlyA	4	0.995718	94.5932	0.988512	7	TTGCCATGGCCCC	TCTTTAAATAT	-
marR_right	RstA	9	0.996841	94.6999	0.988512	5	TTGCCATGGCCCC	TACATTTAGTTACA	+
marR_right	EvgA	-6	0.999876	94.9882	0.988512	7	TTGCCATGGCCCC	TTCCTACAACTGTAAGA	+
marR_right	CaiF	10	0.99988	94.9886	0.988512	5	TTGCCATGGCCCC	ACTTTCAATATTGGT	-
marR_left	marR	1	2.10E-06	0.000199524	0.000396832	13	ACTGCCGGGCCAA	AGTTGCCTGGGCAA	+
marR_left	relBE	10	0.00956406	0.908585	0.602359	13	ACTGCCGGGCCAA	TGTAAAGACACATGTCAAGACAC	+
marR_left	rpoD19	18	0.0300726	2.8569	0.994446	13	ACTGCCGGGCCAA	ATTATACCTCAAAACGGATAAAAAGTGTCAA	-
marR_left	rpoD15	14	0.0374061	3.55358	0.994446	13	ACTGCCGGGCCAA	ATTATACCCTATTCAAAGGGGTGTCAA	-
marR_left	rpoD18	17	0.0488599	4.64169	0.994446	13	ACTGCCGGGCCAA	ATTATAACTGTTAAATAAAAACTTTGTCAA	-
marR_left	rpoD17	16	0.0618729	5.87792	0.994446	13	ACTGCCGGGCCAA	ATTATAACAAAAACTAAATAATTTGTCAA	-
marR_left	BaeR	-6	0.0658312	6.25396	0.994446	7	ACTGCCGGGCCAA	GAGCCAATTATGGAGAA	-
marR_left	NarP	-1	0.0884235	8.40024	0.994446	8	ACTGCCGGGCCAA	ATACCCCT	+
marR_left	rpoD16	15	0.0910852	8.65309	0.994446	13	ACTGCCGGGCCAA	ATTATACAGAAAAAATAAAAAATGTCAA	-
marR_left	CytR	5	0.0949261	9.01798	0.994446	13	ACTGCCGGGCCAA	AATAGATTGCATAAATAT	-
marR_left	UxuR	0	0.0956005	9.08205	0.994446	13	ACTGCCGGGCCAA	AGTGGTTAACCAATT	+
marR_left	IscR	0	0.0972613	9.23983	0.994446	13	ACTGCCGGGCCAA	TATACCCTGCTAATTTAGTCAA	+
marR_left	FlhDC	1	0.103409	9.82387	0.994446	13	ACTGCCGGGCCAA	AAACGCCCGAAAAAGC	-
marR_left	Fis	5	0.11674	11.0903	0.994446	10	ACTGCCGGGCCAA	GCTTATTTTTTAAGC	+
marR_left	SoxS	10	0.127987	12.1588	0.994446	8	ACTGCCGGGCCAA	TTTAGCAATTTGTGCCAT	+
marR_left	marA	10	0.134019	12.7319	0.994446	7	ACTGCCGGGCCAA	TTTAGCAAAAAGTGCCA	+
marR_left	AraC	5	0.161424	15.3353	0.994446	13	ACTGCCGGGCCAA	TATGGACTATCTTGCTGTT	+
marR_left	PdhR	1	0.175319	16.6553	0.994446	13	ACTGCCGGGCCAA	ATTGGTCTTACCAATT	-
marR_left	TyrR	-2	0.177615	16.8735	0.994446	11	ACTGCCGGGCCAA	TGTAAAGAAAAATTTAC	-
marR_left	MlrA	3	0.182359	17.3241	0.994446	13	ACTGCCGGGCCAA	AAAATTGTACAGAAAAAAGTAAATGTACAA	+
marR_left	FadR	1	0.183488	17.4313	0.994446	13	ACTGCCGGGCCAA	AGTGGTCAGACCAGCT	-
marR_left	NtrC	5	0.212458	20.1836	0.994446	12	ACTGCCGGGCCAA	TGCACCATTTTGGTGCA	-
marR_left	CysB	12	0.213407	20.2737	0.994446	13	ACTGCCGGGCCAA	CCATATAGTGATAATGACAAATAAAATGGAATAATAA	-
marR_left	CpxR	2	0.213978	20.3279	0.994446	13	ACTGCCGGGCCAA	GTAAAAATATGTAAA	+
marR_left	Rob	4	0.252252	23.9639	0.994446	13	ACTGCCGGGCCAA	TTAACAATTCGTGCCAT	-
marR_left	MelR	4	0.263827	25.0636	0.994446	13	ACTGCCGGGCCAA	TCTGATTTTCTGGGAATG	-
marR_left	FhlA	7	0.266515	25.3189	0.994446	7	ACTGCCGGGCCAA	CGTCGAAACTGCCA	+
marR_left	DgsA	4	0.276586	26.2757	0.994446	13	ACTGCCGGGCCAA	ATTAATTTCGAGCTGTAAAATAA	-
marR_left	CRP	3	0.307439	29.2067	0.994446	13	ACTGCCGGGCCAA	AAAAATGTGATCTAGATCACAT	-
marR_left	MalT	-4	0.331979	31.538	0.994446	9	ACTGCCGGGCCAA	CGGGGATGAG	+
marR_left	MarA	5	0.333957	31.7259	0.994446	13	ACTGCCGGGCCAA	ACGGCACAAATTGTTAAAT	-
marR_left	Lrp	-5	0.34234	32.5223	0.994446	8	ACTGCCGGGCCAA	CAGCATAAAATT	-
marR_left	ExuR	2	0.360221	34.221	0.994446	13	ACTGCCGGGCCAA	AAAGTGGTATAACAAAT	+
marR_left	OxyR	0	0.360221	34.221	0.994446	13	ACTGCCGGGCCAA	AGTGATAGGTATAATCT	-
marR_left	NarL	-2	0.379535	36.0558	0.994446	8	ACTGCCGGGCCAA	TACCCATT	-
marR_left	DeoR	1	0.384098	36.4893	0.994446	10	ACTGCCGGGCCAA	TGCTGTGAGAA	-
marR_left	NagC	1	0.386471	36.7147	0.994446	13	ACTGCCGGGCCAA	TATTTCACGATGCGAAATAAGT	-
marR_left	ArgP	2	0.417138	39.6282	0.994446	13	ACTGCCGGGCCAA	GTTATAAGTCACAATAAG	-
marR_left	PutA	-6	0.438148	41.6241	0.994446	7	ACTGCCGGGCCAA	GGTGCAACCT	-
marR_left	CsgD	-1	0.4452	42.294	0.994446	11	ACTGCCGGGCCAA	CGAGTGAGTTA	+
marR_left	GntR	0	0.446526	42.4199	0.994446	13	ACTGCCGGGCCAA	TCTGTTACGGGTAACATT	-
marR_left	MntR	3	0.46681	44.3469	0.994446	13	ACTGCCGGGCCAA	AATATAGCAAAAGCTATGTTT	+
marR_left	RutR	-7	0.471159	44.7601	0.994446	6	ACTGCCGGGCCAA	GACCATTTGGTCCACT	+
marR_left	LeuO	6	0.476757	45.2919	0.994446	12	ACTGCCGGGCCAA	ATAACAATTACCACGAAT	-
marR_left	PhoB	10	0.48651	46.2184	0.994446	6	ACTGCCGGGCCAA	CTGTCATAAAACTGTC	+
marR_left	Ada	0	0.497378	47.2509	0.994446	13	ACTGCCGGGCCAA	AAGCAAAGAGCAA	+
marR_left	xylR	-8	0.49818	47.3271	0.994446	5	ACTGCCGGGCCAA	ACCAAATTTCGTAA	+
marR_left	GlpR	1	0.503073	47.792	0.994446	13	ACTGCCGGGCCAA	AAATGATCAATAACGAACAT	+
marR_left	OmpR	0	0.52218	49.6071	0.994446	13	ACTGCCGGGCCAA	AATATGTAACCAAATATTA	+
marR_left	NsrR	2	0.526872	50.0528	0.994446	9	ACTGCCGGGCCAA	AAGATGCATTT	+
marR_left	RhaS	-2	0.585599	55.632	0.994446	11	ACTGCCGGGCCAA	AAACGTCGAAATTTCAA	-
marR_left	PurR	9	0.597359	56.7491	0.994446	7	ACTGCCGGGCCAA	AGGAAAACGTTTGCGT	-
marR_left	RcsAB	-1	0.653901	62.1206	0.994446	12	ACTGCCGGGCCAA	ATTTAGGATAATCCT	-
marR_left	LexA	1	0.708577	67.3148	0.994446	13	ACTGCCGGGCCAA	AACTGTATAAAAAAACAGTA	+
marR_left	NanR	-4	0.709724	67.4238	0.994446	5	ACTGCCGGGCCAA	ACAGG	+
marR_left	Cra	-1	0.71274	67.7103	0.994446	12	ACTGCCGGGCCAA	GAGCTGAATCGTTTCAGT	+
marR_left	MetR	7	0.716279	68.0465	0.994446	8	ACTGCCGGGCCAA	TGAAAAATTTTCATT	+
marR_left	Nac	7	0.716279	68.0465	0.994446	8	ACTGCCGGGCCAA	AATTTATTATGTGAT	+
marR_left	GalS	8	0.788805	74.9365	0.994446	7	ACTGCCGGGCCAA	GTGTAACCGCTTCCA	+
marR_left	UlaR	11	0.797533	75.7656	0.994446	6	ACTGCCGGGCCAA	TTTTGATTAAATTTGAA	-
marR_left	PhoP	1	0.810661	77.0128	0.994446	13	ACTGCCGGGCCAA	TAAACAAATGATAAACA	-
marR_left	MqsA	5	0.820497	77.9472	0.994446	9	ACTGCCGGGCCAA	AATCACCTAAAAGG	-
marR_left	ArgR	8	0.824226	78.3015	0.994446	10	ACTGCCGGGCCAA	TGCATAAAAATTCATTTA	-
marR_left	FNR	2	0.833099	79.1444	0.994446	12	ACTGCCGGGCCAA	TTGATATAAATCAA	-
marR_left	IHF	6	0.835466	79.3692	0.994446	7	ACTGCCGGGCCAA	TAATTAATTGATT	+
marR_left	NrdR	-5	0.847516	80.514	0.994446	8	ACTGCCGGGCCAA	AAATGCTATATATAGTG	-
marR_left	EvgA	8	0.858895	81.595	0.994446	9	ACTGCCGGGCCAA	TTCCTACAACTGTAAGA	+
marR_left	TorR	-1	0.860484	81.7459	0.994446	9	ACTGCCGGGCCAA	ATGAACAGA	-
marR_left	ArcA	0	0.88448	84.0256	0.994446	13	ACTGCCGGGCCAA	AACATATTATTAACA	+
marR_left	MetJ	-8	0.8845	84.0275	0.994446	5	ACTGCCGGGCCAA	GACATCT	-
marR_left	GadW	5	0.906451	86.1129	0.994446	13	ACTGCCGGGCCAA	CTGATTTTAATATTATAATG	+
marR_left	RelBRelE	0	0.919303	87.3338	0.994446	12	ACTGCCGGGCCAA	ATTACAACAAGC	+
marR_left	GalR	-4	0.923264	87.7101	0.994446	9	ACTGCCGGGCCAA	CAGTGGAATCGTTTAC	-
marR_left	GadX	1	0.9244	87.818	0.994446	13	ACTGCCGGGCCAA	TAATGTCTGATTTTTATAT	+
marR_left	AscG	2	0.92669	88.0355	0.994446	11	ACTGCCGGGCCAA	TTTGTGAAACAAG	+
marR_left	CaiF	-8	0.928287	88.1872	0.994446	5	ACTGCCGGGCCAA	AACAATATTGAAAAT	+
marR_left	HNS	3	0.934149	88.7441	0.994446	10	ACTGCCGGGCCAA	TAATAAAATGAAA	+
marR_left	TrpR	4	0.944263	89.7049	0.994446	12	ACTGCCGGGCCAA	CTAGTTAACTAGTACA	+
marR_left	XylR	-9	0.950279	90.2765	0.994446	4	ACTGCCGGGCCAA	ACAATTACGAATTTTC	-
marR_left	AsnC	5	0.954188	90.6479	0.994446	7	ACTGCCGGGCCAA	TTTTTAATGAAT	+
marR_left	ModE	8	0.95666	90.8827	0.994446	13	ACTGCCGGGCCAA	CGCTATATAATTTTGTATATATCG	-
marR_left	RstA	8	0.956971	90.9122	0.994446	6	ACTGCCGGGCCAA	TGTAACTAAATGTA	-
marR_left	Dan	-8	0.957935	91.0039	0.994446	5	ACTGCCGGGCCAA	GTTAATT	+
marR_left	NhaR	5	0.964206	91.5995	0.994446	10	ACTGCCGGGCCAA	CAGTAAAATCCGAAT	-
marR_left	RcsB	-2	0.966629	91.8297	0.994446	11	ACTGCCGGGCCAA	ATTAGGATTAATCT	+
marR_left	HipB	6	0.970067	92.1563	0.994446	13	ACTGCCGGGCCAA	TATCCCCTAGAGCGGATAA	+
marR_left	SlyA	2	0.973019	92.4368	0.994446	9	ACTGCCGGGCCAA	ATATTTAAAGA	+
marR_left	IclR	-6	0.973875	92.5181	0.994446	7	ACTGCCGGGCCAA	ATGAAAA	-
marR_left	GcvA	0	0.974058	92.5355	0.994446	13	ACTGCCGGGCCAA	AATAATCAAATGAAAAAAACTAAT	+
marR_left	Fur	-6	0.985655	93.6373	0.994446	7	ACTGCCGGGCCAA	ATGATAATCATTATCATT	-
marR_left	DnaA	8	0.987797	93.8407	0.994446	3	ACTGCCGGGCCAA	TGTGGATAACT	-
marR_left	MqsAMqsR	-4	0.997665	94.7782	0.994446	9	ACTGCCGGGCCAA	ACAACCTAAAAGGATAGTT	-
marR_left	DcuR	2	0.999974	94.9975	0.994446	13	ACTGCCGGGCCAA	TTAATTTAATTTTTAAA	+
marR_left	AgaR	-11	0.999995	94.9996	0.994446	2	ACTGCCGGGCCAA	AAAAGAAATAAAACGAAAG	-
marR_left	GadE	12	1	95	0.994446	6	ACTGCCGGGCCAA	AGGTTTTTATTATTTAGA	-
araAB_crp	CRP	1	3.92E-06	0.000372163	0.000696926	18	CTTGAGCTGAATCACAAA	ATGTGATCTAGATCACATTTTT	+
araAB_crp	FNR	-1	0.00870999	0.827449	0.469377	14	CTTGAGCTGAATCACAAA	TTGATTTATATCAA	+
araAB_crp	ArgP	-3	0.0124845	1.18602	0.469377	15	CTTGAGCTGAATCACAAA	GTTATAAGTCACAATAAG	-
araAB_crp	AscG	-5	0.01805	1.71475	0.469377	13	CTTGAGCTGAATCACAAA	CATGTTTCACAGA	-
araAB_crp	rpoD15	10	0.0185029	1.75777	0.469377	17	CTTGAGCTGAATCACAAA	ATTATACCCTATTCAAAGGGGTGTCAA	-
araAB_crp	rpoD17	12	0.0211074	2.0052	0.469377	17	CTTGAGCTGAATCACAAA	ATTATAACAAAAACTAAATAATTTGTCAA	-
araAB_crp	GlpR	1	0.0339388	3.22419	0.581934	18	CTTGAGCTGAATCACAAA	AAATGATCAATAACGAACAT	+
araAB_crp	rpoD18	13	0.0342877	3.25733	0.581934	17	CTTGAGCTGAATCACAAA	ATTATAACTGTTAAATAAAAACTTTGTCAA	-
araAB_crp	rpoD16	11	0.0373943	3.55246	0.581934	17	CTTGAGCTGAATCACAAA	ATTATACAGAAAAAATAAAAAATGTCAA	-
araAB_crp	OmpR	-3	0.0401907	3.81812	0.581934	15	CTTGAGCTGAATCACAAA	AATATGTAACCAAATATTA	+
araAB_crp	Lrp	-6	0.0495805	4.71015	0.581934	12	CTTGAGCTGAATCACAAA	CAGCATAAAATT	-
araAB_crp	rpoD19	13	0.0602068	5.71965	0.581934	18	CTTGAGCTGAATCACAAA	TTGACATTTTTTTTGTTTTTTGTGGTATAAT	+
araAB_crp	Ada	-4	0.0706317	6.71001	0.581934	13	CTTGAGCTGAATCACAAA	AAGCAAAGAGCAA	+
araAB_crp	Cra	0	0.0723313	6.87148	0.581934	18	CTTGAGCTGAATCACAAA	ATTGAAACGATTCAGCTA	-
araAB_crp	ExuR	-2	0.0780138	7.41131	0.581934	16	CTTGAGCTGAATCACAAA	AAAGTGGTATAACAAAT	+
araAB_crp	Fis	-8	0.0806641	7.66309	0.581934	10	CTTGAGCTGAATCACAAA	GCTTAAAAAATAAGC	-
araAB_crp	GntR	0	0.0873352	8.29685	0.581934	18	CTTGAGCTGAATCACAAA	GATGTTACCCGTAACAGA	+
araAB_crp	TorR	-1	0.0884796	8.40557	0.581934	9	CTTGAGCTGAATCACAAA	ATGAACAGA	-
araAB_crp	DnaA	-5	0.0914652	8.6892	0.581934	11	CTTGAGCTGAATCACAAA	ATTTATCCACA	+
araAB_crp	GalS	0	0.0933699	8.87014	0.581934	15	CTTGAGCTGAATCACAAA	TGGAAGCGGTTACAT	-
araAB_crp	PdhR	-4	0.0948625	9.01194	0.581934	14	CTTGAGCTGAATCACAAA	ATTGGTCTTACCAATT	-
araAB_crp	SoxS	0	0.104997	9.97467	0.622631	18	CTTGAGCTGAATCACAAA	ATGGCACAAATTGTTAAA	-
araAB_crp	DgsA	6	0.155963	14.8165	0.833569	17	CTTGAGCTGAATCACAAA	ATTAATTTCGAGCTGTAAAATAA	-
araAB_crp	RcsB	-4	0.15931	15.1345	0.833569	14	CTTGAGCTGAATCACAAA	AGATTAGTCCTAAT	-
araAB_crp	UlaR	0	0.168344	15.9926	0.855669	17	CTTGAGCTGAATCACAAA	GTCAAAATTAATCAAAA	+
araAB_crp	TyrR	1	0.175644	16.6862	0.867243	16	CTTGAGCTGAATCACAAA	GTAAATTTATCTTTACA	+
araAB_crp	RelBRelE	-10	0.18037	17.1352	0.867243	8	CTTGAGCTGAATCACAAA	ATTACAACAAGC	+
araAB_crp	NtrC	-7	0.20743	19.7058	0.936319	11	CTTGAGCTGAATCACAAA	TGCACCAAAATGGTGCA	+
araAB_crp	NrdR	-12	0.216042	20.524	0.936319	6	CTTGAGCTGAATCACAAA	CACAATATATAGGATTT	+
araAB_crp	ArcA	-1	0.220677	20.9643	0.936319	15	CTTGAGCTGAATCACAAA	AACATATTATTAACA	+
araAB_crp	Rob	0	0.234088	22.2384	0.936319	17	CTTGAGCTGAATCACAAA	ATGGCACGTATTGTTAA	+
araAB_crp	OxyR	0	0.234088	22.2384	0.936319	17	CTTGAGCTGAATCACAAA	AGTGATAGGTATAATCT	-
araAB_crp	Nac	-5	0.239738	22.7751	0.936319	13	CTTGAGCTGAATCACAAA	ATCACATAATAAAAT	-
araAB_crp	GadW	0	0.258228	24.5317	0.936319	18	CTTGAGCTGAATCACAAA	CATTATAATATTAAAATCAG	-
araAB_crp	CpxR	0	0.260005	24.7004	0.936319	15	CTTGAGCTGAATCACAAA	TTTACATATTTTTAC	-
araAB_crp	AraC	-1	0.272704	25.9069	0.936319	17	CTTGAGCTGAATCACAAA	AACAGCAAGATAGTCCATA	-
araAB_crp	CytR	0	0.274683	26.0949	0.936319	18	CTTGAGCTGAATCACAAA	AATAGATTGCATAAATAT	-
araAB_crp	PhoB	-1	0.279273	26.5309	0.936319	16	CTTGAGCTGAATCACAAA	GACAGTTTTATGACAG	-
araAB_crp	HNS	-3	0.296849	28.2007	0.936319	13	CTTGAGCTGAATCACAAA	TAATAAAATGAAA	+
araAB_crp	CsgD	-3	0.298171	28.3263	0.936319	11	CTTGAGCTGAATCACAAA	CGAGTGAGTTA	+
araAB_crp	marA	-7	0.317474	30.16	0.936319	11	CTTGAGCTGAATCACAAA	TTTAGCAAAAAGTGCCA	+
araAB_crp	LeuO	-10	0.318233	30.2321	0.936319	8	CTTGAGCTGAATCACAAA	ATAACAATTACCACGAAT	-
araAB_crp	NagC	1	0.3383	32.1385	0.936319	18	CTTGAGCTGAATCACAAA	ACTTATTTCGCATCGTGAAATA	+
araAB_crp	MarA	-8	0.338807	32.1867	0.936319	10	CTTGAGCTGAATCACAAA	ACGGCACAAATTGTTAAAT	-
araAB_crp	PhoP	-2	0.353328	33.5662	0.936319	16	CTTGAGCTGAATCACAAA	TAAACAAATGATAAACA	-
araAB_crp	DeoR	-8	0.354568	33.684	0.936319	10	CTTGAGCTGAATCACAAA	TTCTCACAGCA	+
araAB_crp	IHF	-9	0.362045	34.3943	0.936319	9	CTTGAGCTGAATCACAAA	AATCAATTAATTA	-
araAB_crp	ArgR	-7	0.391495	37.192	0.936319	11	CTTGAGCTGAATCACAAA	TGCATAAAAATTCATTTA	-
araAB_crp	XylR	-5	0.400928	38.0881	0.936319	13	CTTGAGCTGAATCACAAA	GAAAAATCATAATTGA	+
araAB_crp	MelR	0	0.417862	39.6968	0.936319	18	CTTGAGCTGAATCACAAA	CATTCCCTGAAACTCAGA	+
araAB_crp	LexA	-4	0.420534	39.9507	0.936319	14	CTTGAGCTGAATCACAAA	AACTGTATAAAAAAACAGTA	+
araAB_crp	ModE	5	0.436448	41.4626	0.936319	18	CTTGAGCTGAATCACAAA	CGCTATATAATTTTGTATATATCG	-
araAB_crp	CysB	1	0.440207	41.8197	0.936319	18	CTTGAGCTGAATCACAAA	CCATATAGTGATAATGACAAATAAAATGGAATAATAA	-
araAB_crp	TrpR	-2	0.442466	42.0343	0.936319	16	CTTGAGCTGAATCACAAA	TGTACTAGTTAACTAG	-
araAB_crp	GadX	-2	0.454687	43.1952	0.936319	16	CTTGAGCTGAATCACAAA	ATATAAAAATCAGACATTT	-
araAB_crp	relBE	-5	0.466002	44.2702	0.936319	13	CTTGAGCTGAATCACAAA	GTGTCTTGACATGTGTCTTTACA	-
araAB_crp	PurR	-11	0.471211	44.7651	0.936319	7	CTTGAGCTGAATCACAAA	ACGCAAACGTTTTCCT	+
araAB_crp	AsnC	-9	0.47603	45.2228	0.936319	9	CTTGAGCTGAATCACAAA	AATCAACAAAAA	-
araAB_crp	MalT	4	0.488243	46.383	0.936319	6	CTTGAGCTGAATCACAAA	CGGGGATGAG	+
araAB_crp	MlrA	3	0.504256	47.9043	0.936319	18	CTTGAGCTGAATCACAAA	AAAATTGTACAGAAAAAAGTAAATGTACAA	+
araAB_crp	NsrR	-3	0.518453	49.2531	0.936319	11	CTTGAGCTGAATCACAAA	AAGATGCATTT	+
araAB_crp	IclR	-10	0.522757	49.6619	0.936319	7	CTTGAGCTGAATCACAAA	ATGAAAA	-
araAB_crp	RcsAB	-4	0.540044	51.3041	0.936319	14	CTTGAGCTGAATCACAAA	AGAATTATCCTAAAA	+
araAB_crp	MqsA	2	0.593812	56.4122	0.936319	12	CTTGAGCTGAATCACAAA	CCTTTTAGGTGGTT	+
araAB_crp	xylR	-3	0.609912	57.9416	0.936319	14	CTTGAGCTGAATCACAAA	ACCAAATTTCGTAA	+
araAB_crp	IscR	7	0.624588	59.3359	0.936319	15	CTTGAGCTGAATCACAAA	TATACCCTGCTAATTTAGTCAA	+
araAB_crp	PutA	-6	0.635309	60.3543	0.936319	10	CTTGAGCTGAATCACAAA	AGGTTGCACC	+
araAB_crp	UxuR	-4	0.64953	61.7053	0.936319	14	CTTGAGCTGAATCACAAA	AATTGGTTAACCACA	-
araAB_crp	FlhDC	1	0.653099	62.0444	0.936319	15	CTTGAGCTGAATCACAAA	AAACGCCCGAAAAAGC	-
araAB_crp	marR	-4	0.657958	62.506	0.936319	14	CTTGAGCTGAATCACAAA	AGTTGCCTGGGCAA	+
araAB_crp	GalR	-1	0.698205	66.3295	0.936319	16	CTTGAGCTGAATCACAAA	GTAACCGATTCCACTG	+
araAB_crp	MetJ	-4	0.706189	67.088	0.936319	7	CTTGAGCTGAATCACAAA	AGATGTC	+
araAB_crp	NhaR	-3	0.710711	67.5175	0.936319	15	CTTGAGCTGAATCACAAA	CAGTAAAATCCGAAT	-
araAB_crp	FadR	5	0.727454	69.1082	0.936319	11	CTTGAGCTGAATCACAAA	AGTGGTCAGACCAGCT	-
araAB_crp	AgaR	1	0.769991	73.1491	0.936319	18	CTTGAGCTGAATCACAAA	AAAAGAAATAAAACGAAAG	-
araAB_crp	RutR	-3	0.796129	75.6322	0.936319	15	CTTGAGCTGAATCACAAA	GACCATTTGGTCCACT	+
araAB_crp	Fur	0	0.802171	76.2062	0.936319	18	CTTGAGCTGAATCACAAA	AATGATAATGATTATCAT	+
araAB_crp	CaiF	-12	0.845425	80.3154	0.936319	6	CTTGAGCTGAATCACAAA	AACAATATTGAAAAT	+
araAB_crp	GcvA	-1	0.884025	83.9824	0.936319	17	CTTGAGCTGAATCACAAA	AATAATCAAATGAAAAAAACTAAT	+
araAB_crp	Dan	-8	0.93073	88.4193	0.936319	7	CTTGAGCTGAATCACAAA	AATTAAC	-
araAB_crp	MqsAMqsR	-10	0.938185	89.1276	0.936319	8	CTTGAGCTGAATCACAAA	ACAACCTAAAAGGATAGTT	-
araAB_crp	NanR	-13	0.939094	89.214	0.936319	5	CTTGAGCTGAATCACAAA	ACAGG	+
araAB_crp	NarL	-4	0.94204	89.4938	0.936319	8	CTTGAGCTGAATCACAAA	TACCCATT	-
araAB_crp	NarP	-4	0.962238	91.4126	0.936319	8	CTTGAGCTGAATCACAAA	AGGGGTAG	-
araAB_crp	HipB	6	0.97215	92.3543	0.936319	13	CTTGAGCTGAATCACAAA	TATCCCCTAGAGCGGATAA	+
araAB_crp	MntR	8	0.976031	92.7229	0.936319	13	CTTGAGCTGAATCACAAA	AAACATAGCCTTTGCTATATT	-
araAB_crp	RhaS	0	0.976774	92.7936	0.936319	17	CTTGAGCTGAATCACAAA	AAACGTCGAAATTTCAA	-
araAB_crp	FhlA	-9	0.977195	92.8335	0.936319	9	CTTGAGCTGAATCACAAA	CGTCGAAACTGCCA	+
araAB_crp	RstA	-12	0.985522	93.6246	0.936319	6	CTTGAGCTGAATCACAAA	TACATTTAGTTACA	+
araAB_crp	GadE	-5	0.985579	93.63	0.936319	13	CTTGAGCTGAATCACAAA	TGTAAATAATAAAAACCT	+
araAB_crp	DcuR	3	0.988891	93.9447	0.936319	14	CTTGAGCTGAATCACAAA	TTAAAAAATTAAAATAA	-
araAB_crp	SlyA	-7	0.991569	94.1991	0.936319	11	CTTGAGCTGAATCACAAA	ATATTTAAAGA	+
araAB_crp	EvgA	3	0.995322	94.5556	0.936319	14	CTTGAGCTGAATCACAAA	TTCCTACAACTGTAAGA	+
araAB_crp	MetR	-10	0.998749	94.8812	0.936319	8	CTTGAGCTGAATCACAAA	TGAAAAATTTTCATT	+
araAB_crp	BaeR	-3	0.999475	94.9502	0.936319	15	CTTGAGCTGAATCACAAA	GAGCCAATTATGGAGAA	-
dgoR_crp	CRP	2	0.000211556	0.0200978	0.0375597	20	TTTTGTGATCCTTGACACTTA	AAAAATGTGATCTAGATCACAT	-
dgoR_crp	SoxS	0	0.00434858	0.413115	0.224503	18	TTTTGTGATCCTTGACACTTA	TTTAGCAATTTGTGCCAT	+
dgoR_crp	rpoD16	-2	0.00505808	0.480517	0.224503	19	TTTTGTGATCCTTGACACTTA	TTGACATCTTTTATTTTTTCTATATAAT	+
dgoR_crp	FNR	-4	0.00940927	0.893881	0.334105	14	TTTTGTGATCCTTGACACTTA	TTGATATAAATCAA	-
dgoR_crp	Rob	-1	0.0120926	1.1488	0.357821	17	TTTTGTGATCCTTGACACTTA	TTAACAATTCGTGCCAT	-
dgoR_crp	AsnC	2	0.0186674	1.7734	0.3799	10	TTTTGTGATCCTTGACACTTA	TTTTTAATGAAT	+
dgoR_crp	xylR	-2	0.01979	1.88005	0.3799	14	TTTTGTGATCCTTGACACTTA	TTACGAAATTTGGT	-
dgoR_crp	GalS	-3	0.0205895	1.956	0.3799	15	TTTTGTGATCCTTGACACTTA	TGGAAGCGGTTACAT	-
dgoR_crp	IclR	-2	0.021398	2.03281	0.3799	7	TTTTGTGATCCTTGACACTTA	TTTTCAT	+
dgoR_crp	marA	0	0.0265217	2.51956	0.42806	17	TTTTGTGATCCTTGACACTTA	TTTAGCAAAAAGTGCCA	+
dgoR_crp	rpoD17	-2	0.0295305	2.8054	0.436904	19	TTTTGTGATCCTTGACACTTA	TTGACAAATTATTTAGTTTCTGTTATAAT	+
dgoR_crp	CpxR	-1	0.0472624	4.48993	0.470476	15	TTTTGTGATCCTTGACACTTA	TTTACATATTTTTAC	-
dgoR_crp	GntR	-1	0.0478944	4.54997	0.470476	18	TTTTGTGATCCTTGACACTTA	TCTGTTACGGGTAACATT	-
dgoR_crp	GalR	-4	0.0493181	4.68522	0.470476	16	TTTTGTGATCCTTGACACTTA	GTAACCGATTCCACTG	+
dgoR_crp	OxyR	-3	0.0502724	4.77588	0.470476	17	TTTTGTGATCCTTGACACTTA	AGTGATAGGTATAATCT	-
dgoR_crp	rpoD19	-2	0.0508018	4.82617	0.470476	19	TTTTGTGATCCTTGACACTTA	TTGACATTTTTTTTGTTTTTTGTGGTATAAT	+
dgoR_crp	MarA	1	0.0514569	4.88841	0.470476	18	TTTTGTGATCCTTGACACTTA	ATTTAACAATTTGTGCCGT	+
dgoR_crp	UlaR	1	0.0552721	5.25085	0.470476	16	TTTTGTGATCCTTGACACTTA	TTTTGATTAAATTTGAA	-
dgoR_crp	CysB	12	0.0592066	5.62463	0.470476	21	TTTTGTGATCCTTGACACTTA	TTATTATTCCATTTTATTTTTCATTATCCCTTTTTGG	+
dgoR_crp	rpoD18	-2	0.0628648	5.97215	0.470476	19	TTTTGTGATCCTTGACACTTA	TTGACAAAGTTATTATTTAACAGGTATAAT	+
dgoR_crp	rpoD15	-2	0.0647643	6.15261	0.470476	19	TTTTGTGATCCTTGACACTTA	TTGACATCCCTTTGAATAGGGTATAAT	+
dgoR_crp	AscG	-1	0.0861318	8.18252	0.568183	13	TTTTGTGATCCTTGACACTTA	TTTGTGAAACAAG	+
dgoR_crp	Lrp	2	0.0864084	8.20879	0.568183	10	TTTTGTGATCCTTGACACTTA	AATTTTATGCTG	+
dgoR_crp	LeuO	9	0.098759	9.3821	0.607533	9	TTTTGTGATCCTTGACACTTA	ATTCGCGGTAATTATGAT	+
dgoR_crp	Fur	-1	0.10761	10.2229	0.636836	18	TTTTGTGATCCTTGACACTTA	ATGATAATCATTATCATT	-
dgoR_crp	CytR	4	0.117125	11.1269	0.670785	14	TTTTGTGATCCTTGACACTTA	TTATTTATGCAATTTGTT	+
dgoR_crp	RelBRelE	3	0.127404	12.1034	0.706855	9	TTTTGTGATCCTTGACACTTA	AAAACTTGTAAT	-
dgoR_crp	OmpR	5	0.13423	12.7518	0.717237	14	TTTTGTGATCCTTGACACTTA	TTATATTTGGTTACATATA	-
dgoR_crp	ArgP	2	0.144035	13.6833	0.717237	16	TTTTGTGATCCTTGACACTTA	CTTATTGTCTCTTATTGC	+
dgoR_crp	DgsA	1	0.152725	14.5088	0.717237	21	TTTTGTGATCCTTGACACTTA	TTATTTTACAGTTCGAAATTAAT	+
dgoR_crp	Fis	5	0.163437	15.5265	0.717237	10	TTTTGTGATCCTTGACACTTA	GCTTATTTTTTAAGC	+
dgoR_crp	Nac	6	0.163437	15.5265	0.717237	9	TTTTGTGATCCTTGACACTTA	AATTTATTATGTGAT	+
dgoR_crp	AgaR	6	0.163916	15.572	0.717237	13	TTTTGTGATCCTTGACACTTA	CTTTCGTTTTCTTTCTTTT	+
dgoR_crp	PhoB	5	0.165634	15.7353	0.717237	11	TTTTGTGATCCTTGACACTTA	GACAGTTTTATGACAG	-
dgoR_crp	GcvA	6	0.178396	16.9476	0.754106	18	TTTTGTGATCCTTGACACTTA	ATTAGATTATCTAATATGAGTAAT	-
dgoR_crp	AraC	-1	0.184122	17.4916	0.760211	19	TTTTGTGATCCTTGACACTTA	TATGGACTATCTTGCTGTT	+
dgoR_crp	RcsAB	0	0.20038	19.0361	0.773382	15	TTTTGTGATCCTTGACACTTA	ATTTAGGATAATCCT	-
dgoR_crp	GlpR	0	0.212891	20.2247	0.804185	20	TTTTGTGATCCTTGACACTTA	ATGTTCGTTATTGATCATTT	-
dgoR_crp	TorR	-3	0.233278	22.1614	0.836546	9	TTTTGTGATCCTTGACACTTA	TCTGTTCAT	+
dgoR_crp	ArcA	-2	0.252711	24.0076	0.836546	15	TTTTGTGATCCTTGACACTTA	AACATATTATTAACA	+
dgoR_crp	GadW	1	0.254725	24.1989	0.836546	19	TTTTGTGATCCTTGACACTTA	CTGATTTTAATATTATAATG	+
dgoR_crp	GadE	4	0.255508	24.2732	0.836546	14	TTTTGTGATCCTTGACACTTA	AGGTTTTTATTATTTAGA	-
dgoR_crp	IHF	3	0.259046	24.6094	0.836546	10	TTTTGTGATCCTTGACACTTA	TAATTAATTGATT	+
dgoR_crp	MqsA	4	0.277788	26.3899	0.864695	10	TTTTGTGATCCTTGACACTTA	CCTTTTAGGTGGTT	+
dgoR_crp	FadR	3	0.293042	27.839	0.881809	13	TTTTGTGATCCTTGACACTTA	AGCTGGTCTGACCTGT	+
dgoR_crp	FhlA	-3	0.332627	31.5995	0.934422	14	TTTTGTGATCCTTGACACTTA	TGTCCGTTTCGACG	-
dgoR_crp	GadX	-1	0.335782	31.8993	0.934422	19	TTTTGTGATCCTTGACACTTA	ATATAAAAATCAGACATTT	-
dgoR_crp	FlhDC	2	0.35898	34.1031	0.934422	14	TTTTGTGATCCTTGACACTTA	GCTTTTTCGGGCGATT	+
dgoR_crp	relBE	0	0.400276	38.0262	0.934422	21	TTTTGTGATCCTTGACACTTA	TGTAAAGACACATGTCAAGACAC	+
dgoR_crp	SlyA	3	0.410035	38.9533	0.934422	8	TTTTGTGATCCTTGACACTTA	ATATTTAAAGA	+
dgoR_crp	DeoR	0	0.424221	40.301	0.934422	11	TTTTGTGATCCTTGACACTTA	TGCTGTGAGAA	-
dgoR_crp	DcuR	9	0.451949	42.9351	0.934422	8	TTTTGTGATCCTTGACACTTA	TTAATTTAATTTTTAAA	+
dgoR_crp	Ada	-4	0.453235	43.0573	0.934422	13	TTTTGTGATCCTTGACACTTA	TTGCGCTTTGATT	-
dgoR_crp	CsgD	-1	0.468042	44.464	0.934422	11	TTTTGTGATCCTTGACACTTA	TAACTCACTCG	-
dgoR_crp	LexA	0	0.474642	45.091	0.934422	20	TTTTGTGATCCTTGACACTTA	TACTGTTTTTTTATACAGTT	-
dgoR_crp	XylR	2	0.498619	47.3688	0.934422	14	TTTTGTGATCCTTGACACTTA	ACAATTACGAATTTTC	-
dgoR_crp	PhoP	1	0.504508	47.9283	0.934422	16	TTTTGTGATCCTTGACACTTA	TGTTTATCATTTGTTTA	+
dgoR_crp	NrdR	10	0.531425	50.4854	0.934422	7	TTTTGTGATCCTTGACACTTA	AAATGCTATATATAGTG	-
dgoR_crp	NagC	2	0.535777	50.8988	0.934422	20	TTTTGTGATCCTTGACACTTA	TATTTCACGATGCGAAATAAGT	-
dgoR_crp	BaeR	-1	0.544994	51.7745	0.934422	17	TTTTGTGATCCTTGACACTTA	TTCTCCATAATTGGCGC	+
dgoR_crp	MetJ	-4	0.573923	54.5227	0.934422	7	TTTTGTGATCCTTGACACTTA	GACATCT	-
dgoR_crp	RstA	4	0.587172	55.7813	0.934422	10	TTTTGTGATCCTTGACACTTA	TACATTTAGTTACA	+
dgoR_crp	marR	-5	0.616005	58.5205	0.934422	14	TTTTGTGATCCTTGACACTTA	TTGCCCAGGCAACT	-
dgoR_crp	TyrR	-5	0.62697	59.5621	0.934422	16	TTTTGTGATCCTTGACACTTA	TGTAAAGAAAAATTTAC	-
dgoR_crp	NtrC	8	0.6541	62.1395	0.934422	9	TTTTGTGATCCTTGACACTTA	TGCACCATTTTGGTGCA	-
dgoR_crp	ArgR	-1	0.654338	62.1621	0.934422	18	TTTTGTGATCCTTGACACTTA	TGCATAAAAATTCATTTA	-
dgoR_crp	MqsAMqsR	10	0.66457	63.1341	0.934422	9	TTTTGTGATCCTTGACACTTA	AACTAACCTTTTAGGTGGT	+
dgoR_crp	NarL	-5	0.675027	64.1276	0.934422	8	TTTTGTGATCCTTGACACTTA	TACCCATT	-
dgoR_crp	MelR	-1	0.693877	65.9183	0.934422	18	TTTTGTGATCCTTGACACTTA	TCTGATTTTCTGGGAATG	-
dgoR_crp	MetR	7	0.697804	66.2913	0.934422	8	TTTTGTGATCCTTGACACTTA	CATGCAATTTTTTCA	-
dgoR_crp	HNS	-2	0.699935	66.4939	0.934422	13	TTTTGTGATCCTTGACACTTA	TTTCATTTTATTA	-
dgoR_crp	MlrA	14	0.716983	68.1134	0.934422	16	TTTTGTGATCCTTGACACTTA	TTGTACATTTACGTTTTTCTGTACAATTTT	-
dgoR_crp	Cra	-1	0.719583	68.3604	0.934422	18	TTTTGTGATCCTTGACACTTA	GAGCTGAATCGTTTCAGT	+
dgoR_crp	UxuR	1	0.763081	72.4927	0.934422	14	TTTTGTGATCCTTGACACTTA	AATTGGTTAACCACA	-
dgoR_crp	RhaS	-4	0.76983	73.1338	0.934422	17	TTTTGTGATCCTTGACACTTA	TTGAAATTTCGCCGGTA	+
dgoR_crp	IscR	-4	0.788587	74.9158	0.934422	17	TTTTGTGATCCTTGACACTTA	TATACCCTGCTAATTTAGTCAA	+
dgoR_crp	MalT	-4	0.799053	75.91	0.934422	10	TTTTGTGATCCTTGACACTTA	CTCATCCCCC	-
dgoR_crp	PdhR	3	0.80339	76.322	0.934422	13	TTTTGTGATCCTTGACACTTA	AATTGGTAAGACCAAT	+
dgoR_crp	DnaA	-2	0.82181	78.072	0.934422	11	TTTTGTGATCCTTGACACTTA	TGTGGATAACT	-
dgoR_crp	NarP	-11	0.856011	81.3211	0.934422	8	TTTTGTGATCCTTGACACTTA	ATACCCCT	+
dgoR_crp	NhaR	7	0.863294	82.0129	0.934422	8	TTTTGTGATCCTTGACACTTA	ATTCGGATTTTACTA	+
dgoR_crp	RcsB	-1	0.8681	82.4695	0.934422	14	TTTTGTGATCCTTGACACTTA	ATTAGGATTAATCT	+
dgoR_crp	RutR	5	0.874839	83.1097	0.934422	11	TTTTGTGATCCTTGACACTTA	GACCATTTGGTCCACT	+
dgoR_crp	NsrR	7	0.896337	85.152	0.934422	4	TTTTGTGATCCTTGACACTTA	AAATGCATCTT	-
dgoR_crp	NanR	-1	0.919838	87.3847	0.934422	5	TTTTGTGATCCTTGACACTTA	CCTGT	-
dgoR_crp	PurR	9	0.921893	87.5798	0.934422	7	TTTTGTGATCCTTGACACTTA	ACGCAAACGTTTTCCT	+
dgoR_crp	MntR	9	0.944019	89.6818	0.934422	12	TTTTGTGATCCTTGACACTTA	AAACATAGCCTTTGCTATATT	-
dgoR_crp	ModE	2	0.953791	90.6102	0.934422	21	TTTTGTGATCCTTGACACTTA	CGCTATATAATTTTGTATATATCG	-
dgoR_crp	CaiF	2	0.955368	90.76	0.934422	13	TTTTGTGATCCTTGACACTTA	ACTTTCAATATTGGT	-
dgoR_crp	TrpR	-1	0.955534	90.7757	0.934422	16	TTTTGTGATCCTTGACACTTA	CTAGTTAACTAGTACA	+
dgoR_crp	Dan	0	0.959327	91.1361	0.934422	7	TTTTGTGATCCTTGACACTTA	GTTAATT	+
dgoR_crp	EvgA	9	0.973685	92.5001	0.934422	8	TTTTGTGATCCTTGACACTTA	TTCCTACAACTGTAAGA	+
dgoR_crp	HipB	9	0.976692	92.7858	0.934422	10	TTTTGTGATCCTTGACACTTA	TTATCCGCTCTAGGGGATA	-
dgoR_crp	PutA	-10	0.97769	92.8806	0.934422	10	TTTTGTGATCCTTGACACTTA	GGTGCAACCT	-
dgoR_crp	ExuR	-2	0.989264	93.9801	0.934422	17	TTTTGTGATCCTTGACACTTA	ATTTGTTTAACCACTTT	-
relBE	relBE	0	7.20E-09	6.84E-07	1.35E-06	23	TGTAATGACATTTGTAATTACAA	TGTAAAGACACATGTCAAGACAC	+
relBE	Fur	-3	0.00242619	0.230488	0.15118	18	TGTAATGACATTTGTAATTACAA	AATGATAATGATTATCAT	+
relBE	RelBRelE	-6	0.00497336	0.472469	0.232423	12	TGTAATGACATTTGTAATTACAA	AAAACTTGTAAT	-
relBE	TyrR	0	0.00677467	0.643593	0.253284	17	TGTAATGACATTTGTAATTACAA	TGTAAAGAAAAATTTAC	-
relBE	marA	-5	0.0292058	2.77455	0.682446	17	TGTAATGACATTTGTAATTACAA	TGGCACTTTTTGCTAAA	-
relBE	ArcA	-8	0.0421274	4.0021	0.822982	15	TGTAATGACATTTGTAATTACAA	AACATATTATTAACA	+
relBE	CysB	14	0.0450292	4.27778	0.822982	23	TGTAATGACATTTGTAATTACAA	CCATATAGTGATAATGACAAATAAAATGGAATAATAA	-
relBE	UlaR	-6	0.0518658	4.92725	0.822982	17	TGTAATGACATTTGTAATTACAA	GTCAAAATTAATCAAAA	+
relBE	OmpR	4	0.0528598	5.02168	0.822982	15	TGTAATGACATTTGTAATTACAA	AATATGTAACCAAATATTA	+
relBE	CRP	7	0.0572327	5.4371	0.822982	15	TGTAATGACATTTGTAATTACAA	ATGTGATCTAGATCACATTTTT	+
relBE	MlrA	3	0.0687985	6.53585	0.857388	23	TGTAATGACATTTGTAATTACAA	TTGTACATTTACGTTTTTCTGTACAATTTT	-
relBE	SoxS	-4	0.0857062	8.14209	0.976922	18	TGTAATGACATTTGTAATTACAA	ATGGCACAAATTGTTAAA	-
relBE	PdhR	-8	0.0911517	8.65941	0.976922	15	TGTAATGACATTTGTAATTACAA	AATTGGTAAGACCAAT	+
relBE	Rob	-4	0.0971238	9.22677	0.976922	17	TGTAATGACATTTGTAATTACAA	ATGGCACGTATTGTTAA	+
relBE	DgsA	1	0.127388	12.1019	0.976922	22	TGTAATGACATTTGTAATTACAA	TTATTTTACAGTTCGAAATTAAT	+
relBE	rpoD17	5	0.128272	12.1858	0.976922	23	TGTAATGACATTTGTAATTACAA	TTGACAAATTATTTAGTTTCTGTTATAAT	+
relBE	rpoD19	7	0.130571	12.4043	0.976922	23	TGTAATGACATTTGTAATTACAA	TTGACATTTTTTTTGTTTTTTGTGGTATAAT	+
relBE	rpoD16	-4	0.133413	12.6742	0.976922	19	TGTAATGACATTTGTAATTACAA	TTGACATCTTTTATTTTTTCTATATAAT	+
relBE	DcuR	0	0.135876	12.9082	0.976922	17	TGTAATGACATTTGTAATTACAA	TTAATTTAATTTTTAAA	+
relBE	EvgA	-3	0.135876	12.9082	0.976922	17	TGTAATGACATTTGTAATTACAA	TCTTACAGTTGTAGGAA	-
relBE	xylR	-2	0.150595	14.3065	0.983867	14	TGTAATGACATTTGTAATTACAA	TTACGAAATTTGGT	-
relBE	rpoD18	6	0.163791	15.5601	0.983867	23	TGTAATGACATTTGTAATTACAA	TTGACAAAGTTATTATTTAACAGGTATAAT	+
relBE	CpxR	-1	0.169771	16.1282	0.983867	15	TGTAATGACATTTGTAATTACAA	GTAAAAATATGTAAA	+
relBE	SlyA	-10	0.174851	16.6108	0.983867	11	TGTAATGACATTTGTAATTACAA	TCTTTAAATAT	-
relBE	GadX	-2	0.186377	17.7059	0.983867	19	TGTAATGACATTTGTAATTACAA	TAATGTCTGATTTTTATAT	+
relBE	OxyR	-3	0.193889	18.4195	0.983867	17	TGTAATGACATTTGTAATTACAA	AGTGATAGGTATAATCT	-
relBE	GntR	-3	0.205783	19.5494	0.983867	18	TGTAATGACATTTGTAATTACAA	TCTGTTACGGGTAACATT	-
relBE	RstA	-12	0.220795	20.9755	0.983867	11	TGTAATGACATTTGTAATTACAA	TGTAACTAAATGTA	-
relBE	rpoD15	-4	0.223927	21.2731	0.983867	19	TGTAATGACATTTGTAATTACAA	TTGACATCCCTTTGAATAGGGTATAAT	+
relBE	FNR	-4	0.229909	21.8413	0.983867	14	TGTAATGACATTTGTAATTACAA	TTGATATAAATCAA	-
relBE	GadW	-4	0.238929	22.6983	0.983867	19	TGTAATGACATTTGTAATTACAA	CTGATTTTAATATTATAATG	+
relBE	MetJ	-6	0.240235	22.8223	0.983867	7	TGTAATGACATTTGTAATTACAA	GACATCT	-
relBE	Nac	-4	0.252746	24.0109	0.983867	15	TGTAATGACATTTGTAATTACAA	ATCACATAATAAAAT	-
relBE	MarA	-4	0.302304	28.7189	0.983867	19	TGTAATGACATTTGTAATTACAA	ACGGCACAAATTGTTAAAT	-
relBE	CytR	2	0.322238	30.6126	0.983867	16	TGTAATGACATTTGTAATTACAA	TTATTTATGCAATTTGTT	+
relBE	FadR	3	0.335357	31.8589	0.983867	13	TGTAATGACATTTGTAATTACAA	AGCTGGTCTGACCTGT	+
relBE	GlpR	-7	0.340391	32.3372	0.983867	16	TGTAATGACATTTGTAATTACAA	AAATGATCAATAACGAACAT	+
relBE	IHF	-3	0.382534	36.3408	0.983867	13	TGTAATGACATTTGTAATTACAA	AATCAATTAATTA	-
relBE	ArgR	4	0.423626	40.2445	0.983867	14	TGTAATGACATTTGTAATTACAA	TGCATAAAAATTCATTTA	-
relBE	IclR	-11	0.436168	41.436	0.983867	7	TGTAATGACATTTGTAATTACAA	TTTTCAT	+
relBE	marR	-3	0.439051	41.7098	0.983867	14	TGTAATGACATTTGTAATTACAA	AGTTGCCTGGGCAA	+
relBE	AscG	-1	0.451936	42.9339	0.983867	13	TGTAATGACATTTGTAATTACAA	TTTGTGAAACAAG	+
relBE	LeuO	0	0.485904	46.1609	0.983867	18	TGTAATGACATTTGTAATTACAA	ATTCGCGGTAATTATGAT	+
relBE	DeoR	-9	0.487467	46.3093	0.983867	11	TGTAATGACATTTGTAATTACAA	TGCTGTGAGAA	-
relBE	XylR	-5	0.497507	47.2632	0.983867	16	TGTAATGACATTTGTAATTACAA	GAAAAATCATAATTGA	+
relBE	TorR	1	0.508326	48.291	0.983867	8	TGTAATGACATTTGTAATTACAA	ATGAACAGA	-
relBE	RhaS	-11	0.512992	48.7343	0.983867	12	TGTAATGACATTTGTAATTACAA	TTGAAATTTCGCCGGTA	+
relBE	HNS	3	0.586499	55.7174	0.983867	10	TGTAATGACATTTGTAATTACAA	TAATAAAATGAAA	+
relBE	Lrp	-7	0.587538	55.8161	0.983867	12	TGTAATGACATTTGTAATTACAA	AATTTTATGCTG	+
relBE	NsrR	-3	0.601292	57.1228	0.983867	11	TGTAATGACATTTGTAATTACAA	AAATGCATCTT	-
relBE	LexA	7	0.60278	57.2641	0.983867	13	TGTAATGACATTTGTAATTACAA	AACTGTATAAAAAAACAGTA	+
relBE	ArgP	-6	0.630432	59.891	0.983867	17	TGTAATGACATTTGTAATTACAA	GTTATAAGTCACAATAAG	-
relBE	PhoB	5	0.662925	62.9779	0.983867	11	TGTAATGACATTTGTAATTACAA	GACAGTTTTATGACAG	-
relBE	NarL	-12	0.684037	64.9835	0.983867	8	TGTAATGACATTTGTAATTACAA	AATGGGTA	+
relBE	Dan	-15	0.731316	69.475	0.983867	7	TGTAATGACATTTGTAATTACAA	AATTAAC	-
relBE	ExuR	3	0.738841	70.1899	0.983867	14	TGTAATGACATTTGTAATTACAA	ATTTGTTTAACCACTTT	-
relBE	NagC	-1	0.749052	71.16	0.983867	22	TGTAATGACATTTGTAATTACAA	TATTTCACGATGCGAAATAAGT	-
relBE	FlhDC	3	0.754826	71.7085	0.983867	13	TGTAATGACATTTGTAATTACAA	GCTTTTTCGGGCGATT	+
relBE	AsnC	2	0.7688	73.036	0.983867	10	TGTAATGACATTTGTAATTACAA	TTTTTAATGAAT	+
relBE	GcvA	0	0.772275	73.3661	0.983867	23	TGTAATGACATTTGTAATTACAA	AATAATCAAATGAAAAAAACTAAT	+
relBE	Cra	-1	0.7919	75.2305	0.983867	18	TGTAATGACATTTGTAATTACAA	GAGCTGAATCGTTTCAGT	+
relBE	AraC	-2	0.805543	76.5266	0.983867	19	TGTAATGACATTTGTAATTACAA	TATGGACTATCTTGCTGTT	+
relBE	NanR	2	0.809559	76.9081	0.983867	3	TGTAATGACATTTGTAATTACAA	CCTGT	-
relBE	Fis	-6	0.816123	77.5317	0.983867	15	TGTAATGACATTTGTAATTACAA	GCTTATTTTTTAAGC	+
relBE	RcsB	-1	0.827509	78.6133	0.983867	14	TGTAATGACATTTGTAATTACAA	ATTAGGATTAATCT	+
relBE	GadE	-12	0.84427	80.2056	0.983867	11	TGTAATGACATTTGTAATTACAA	TGTAAATAATAAAAACCT	+
relBE	DnaA	1	0.850167	80.7659	0.983867	10	TGTAATGACATTTGTAATTACAA	ATTTATCCACA	+
relBE	RcsAB	0	0.868268	82.4855	0.983867	15	TGTAATGACATTTGTAATTACAA	ATTTAGGATAATCCT	-
relBE	GalS	-11	0.868268	82.4855	0.983867	12	TGTAATGACATTTGTAATTACAA	GTGTAACCGCTTCCA	+
relBE	Ada	1	0.868916	82.547	0.983867	12	TGTAATGACATTTGTAATTACAA	TTGCGCTTTGATT	-
relBE	PhoP	1	0.869465	82.5991	0.983867	16	TGTAATGACATTTGTAATTACAA	TGTTTATCATTTGTTTA	+
relBE	NarP	-9	0.871374	82.7805	0.983867	8	TGTAATGACATTTGTAATTACAA	AGGGGTAG	-
relBE	CsgD	-1	0.872307	82.8691	0.983867	11	TGTAATGACATTTGTAATTACAA	CGAGTGAGTTA	+
relBE	MetR	-3	0.877571	83.3692	0.983867	15	TGTAATGACATTTGTAATTACAA	CATGCAATTTTTTCA	-
relBE	FhlA	4	0.888138	84.3731	0.983867	10	TGTAATGACATTTGTAATTACAA	CGTCGAAACTGCCA	+
relBE	ModE	5	0.912389	86.677	0.983867	19	TGTAATGACATTTGTAATTACAA	CGCTATATAATTTTGTATATATCG	-
relBE	AgaR	6	0.936434	88.9613	0.983867	13	TGTAATGACATTTGTAATTACAA	CTTTCGTTTTCTTTCTTTT	+
relBE	UxuR	-7	0.943372	89.6203	0.983867	15	TGTAATGACATTTGTAATTACAA	AATTGGTTAACCACA	-
relBE	CaiF	3	0.962628	91.4497	0.983867	12	TGTAATGACATTTGTAATTACAA	AACAATATTGAAAAT	+
relBE	GalR	-2	0.967701	91.9316	0.983867	16	TGTAATGACATTTGTAATTACAA	CAGTGGAATCGTTTAC	-
relBE	MelR	11	0.968098	91.9693	0.983867	7	TGTAATGACATTTGTAATTACAA	TCTGATTTTCTGGGAATG	-
relBE	NhaR	-8	0.97658	92.7751	0.983867	15	TGTAATGACATTTGTAATTACAA	ATTCGGATTTTACTA	+
relBE	MqsAMqsR	6	0.979281	93.0317	0.983867	13	TGTAATGACATTTGTAATTACAA	ACAACCTAAAAGGATAGTT	-
relBE	RutR	-6	0.979889	93.0894	0.983867	16	TGTAATGACATTTGTAATTACAA	GACCATTTGGTCCACT	+
relBE	NrdR	10	0.980007	93.1006	0.983867	7	TGTAATGACATTTGTAATTACAA	AAATGCTATATATAGTG	-
relBE	IscR	-4	0.983005	93.3855	0.983867	19	TGTAATGACATTTGTAATTACAA	TATACCCTGCTAATTTAGTCAA	+
relBE	MalT	1	0.99413	94.4424	0.983867	9	TGTAATGACATTTGTAATTACAA	CGGGGATGAG	+
relBE	NtrC	-5	0.997064	94.7211	0.983867	17	TGTAATGACATTTGTAATTACAA	TGCACCATTTTGGTGCA	-
relBE	TrpR	-5	0.998041	94.8139	0.983867	16	TGTAATGACATTTGTAATTACAA	TGTACTAGTTAACTAG	-
relBE	MqsA	2	0.998079	94.8175	0.983867	12	TGTAATGACATTTGTAATTACAA	CCTTTTAGGTGGTT	+
relBE	PutA	4	0.998674	94.874	0.983867	6	TGTAATGACATTTGTAATTACAA	AGGTTGCACC	+
relBE	MntR	0	0.99997	94.9972	0.983867	21	TGTAATGACATTTGTAATTACAA	AAACATAGCCTTTGCTATATT	-
relBE	PurR	-1	0.999997	94.9998	0.983867	16	TGTAATGACATTTGTAATTACAA	AGGAAAACGTTTGCGT	-
relBE	BaeR	6	1	95	0.983867	11	TGTAATGACATTTGTAATTACAA	TTCTCCATAATTGGCGC	+
relBE	HipB	8	1	95	0.983867	11	TGTAATGACATTTGTAATTACAA	TATCCCCTAGAGCGGATAA	+
lac_crp	CRP	0	2.37E-12	2.25E-10	4.28E-10	22	ATGTGATCTAGATCACAATTTTT	ATGTGATCTAGATCACATTTTT	+
lac_crp	FNR	-2	2.76E-05	0.0026187	0.00166217	14	ATGTGATCTAGATCACAATTTTT	TTGATATAAATCAA	-
lac_crp	GntR	1	0.00252279	0.239665	0.091274	17	ATGTGATCTAGATCACAATTTTT	GATGTTACCCGTAACAGA	+
lac_crp	GlpR	0	0.0141869	1.34775	0.366627	20	ATGTGATCTAGATCACAATTTTT	AAATGATCAATAACGAACAT	+
lac_crp	GalS	0	0.0389073	3.6962	0.588385	15	ATGTGATCTAGATCACAATTTTT	GTGTAACCGCTTCCA	+
lac_crp	MlrA	8	0.0392265	3.72652	0.588385	22	ATGTGATCTAGATCACAATTTTT	TTGTACATTTACGTTTTTCTGTACAATTTT	-
lac_crp	rpoD16	0	0.0456109	4.33304	0.588385	23	ATGTGATCTAGATCACAATTTTT	TTGACATCTTTTATTTTTTCTATATAAT	+
lac_crp	OmpR	-4	0.0515155	4.89398	0.588385	19	ATGTGATCTAGATCACAATTTTT	AATATGTAACCAAATATTA	+
lac_crp	GadX	-3	0.0515155	4.89398	0.588385	19	ATGTGATCTAGATCACAATTTTT	ATATAAAAATCAGACATTT	-
lac_crp	rpoD17	3	0.0585741	5.56454	0.588385	23	ATGTGATCTAGATCACAATTTTT	ATTATAACAAAAACTAAATAATTTGTCAA	-
lac_crp	AraC	-1	0.0590557	5.61029	0.588385	19	ATGTGATCTAGATCACAATTTTT	TATGGACTATCTTGCTGTT	+
lac_crp	IHF	-10	0.0611289	5.80724	0.588385	13	ATGTGATCTAGATCACAATTTTT	AATCAATTAATTA	-
lac_crp	ArgP	-4	0.0617987	5.87088	0.588385	18	ATGTGATCTAGATCACAATTTTT	GTTATAAGTCACAATAAG	-
lac_crp	rpoD19	1	0.0897276	8.52412	0.68513	23	ATGTGATCTAGATCACAATTTTT	ATTATACCTCAAAACGGATAAAAAGTGTCAA	-
lac_crp	PhoB	-2	0.0912276	8.66662	0.68513	16	ATGTGATCTAGATCACAATTTTT	GACAGTTTTATGACAG	-
lac_crp	RelBRelE	-11	0.0942289	8.95174	0.68513	12	ATGTGATCTAGATCACAATTTTT	ATTACAACAAGC	+
lac_crp	OxyR	-1	0.0968524	9.20098	0.68513	17	ATGTGATCTAGATCACAATTTTT	AGTGATAGGTATAATCT	-
lac_crp	rpoD18	-2	0.106781	10.1442	0.68513	21	ATGTGATCTAGATCACAATTTTT	TTGACAAAGTTATTATTTAACAGGTATAAT	+
lac_crp	CpxR	-2	0.107358	10.199	0.68513	15	ATGTGATCTAGATCACAATTTTT	GTAAAAATATGTAAA	+
lac_crp	GalR	-2	0.109834	10.4342	0.68513	16	ATGTGATCTAGATCACAATTTTT	GTAACCGATTCCACTG	+
lac_crp	rpoD15	1	0.121795	11.5705	0.734419	23	ATGTGATCTAGATCACAATTTTT	ATTATACCCTATTCAAAGGGGTGTCAA	-
lac_crp	ArcA	-2	0.148622	14.1191	0.781199	15	ATGTGATCTAGATCACAATTTTT	AACATATTATTAACA	+
lac_crp	MarA	-9	0.151036	14.3484	0.781199	14	ATGTGATCTAGATCACAATTTTT	ATTTAACAATTTGTGCCGT	+
lac_crp	Fur	-1	0.167493	15.9119	0.781199	18	ATGTGATCTAGATCACAATTTTT	AATGATAATGATTATCAT	+
lac_crp	HNS	-10	0.171707	16.3122	0.781199	13	ATGTGATCTAGATCACAATTTTT	TTTCATTTTATTA	-
lac_crp	NtrC	-11	0.177056	16.8203	0.781199	12	ATGTGATCTAGATCACAATTTTT	TGCACCATTTTGGTGCA	-
lac_crp	SoxS	-1	0.196209	18.6399	0.845096	18	ATGTGATCTAGATCACAATTTTT	TTTAGCAATTTGTGCCAT	+
lac_crp	ModE	2	0.218276	20.7362	0.904108	22	ATGTGATCTAGATCACAATTTTT	CGATATGTACAAGATTATATAGCG	+
lac_crp	ExuR	-5	0.224904	21.3659	0.904108	17	ATGTGATCTAGATCACAATTTTT	ATTTGTTTAACCACTTT	-
lac_crp	marA	-10	0.233757	22.2069	0.917981	13	ATGTGATCTAGATCACAATTTTT	TGGCACTTTTTGCTAAA	-
lac_crp	ArgR	-3	0.246316	23.4	0.917981	18	ATGTGATCTAGATCACAATTTTT	TGCATAAAAATTCATTTA	-
lac_crp	RcsB	-5	0.248653	23.622	0.917981	14	ATGTGATCTAGATCACAATTTTT	AGATTAGTCCTAAT	-
lac_crp	DeoR	-9	0.262296	24.9181	0.936825	11	ATGTGATCTAGATCACAATTTTT	TTCTCACAGCA	+
lac_crp	LexA	0	0.264115	25.0909	0.936825	20	ATGTGATCTAGATCACAATTTTT	TACTGTTTTTTTATACAGTT	-
lac_crp	Ada	-5	0.280444	26.6422	0.952099	13	ATGTGATCTAGATCACAATTTTT	AAGCAAAGAGCAA	+
lac_crp	UlaR	10	0.325045	30.8793	0.952099	7	ATGTGATCTAGATCACAATTTTT	TTTTGATTAAATTTGAA	-
lac_crp	Nac	8	0.325689	30.9404	0.952099	7	ATGTGATCTAGATCACAATTTTT	AATTTATTATGTGAT	+
lac_crp	CytR	-4	0.326805	31.0464	0.952099	18	ATGTGATCTAGATCACAATTTTT	AATAGATTGCATAAATAT	-
lac_crp	NsrR	-10	0.340759	32.3721	0.952099	11	ATGTGATCTAGATCACAATTTTT	AAATGCATCTT	-
lac_crp	Lrp	-7	0.342834	32.5692	0.952099	12	ATGTGATCTAGATCACAATTTTT	CAGCATAAAATT	-
lac_crp	GadW	3	0.37785	35.8957	0.952099	17	ATGTGATCTAGATCACAATTTTT	CTGATTTTAATATTATAATG	+
lac_crp	XylR	-8	0.381728	36.2642	0.952099	15	ATGTGATCTAGATCACAATTTTT	ACAATTACGAATTTTC	-
lac_crp	MelR	-12	0.384839	36.5597	0.952099	11	ATGTGATCTAGATCACAATTTTT	TCTGATTTTCTGGGAATG	-
lac_crp	AscG	-6	0.398383	37.8464	0.952099	13	ATGTGATCTAGATCACAATTTTT	CATGTTTCACAGA	-
lac_crp	LeuO	11	0.40957	38.9091	0.952099	7	ATGTGATCTAGATCACAATTTTT	ATTCGCGGTAATTATGAT	+
lac_crp	IclR	-18	0.414959	39.4211	0.952099	5	ATGTGATCTAGATCACAATTTTT	TTTTCAT	+
lac_crp	Cra	1	0.448104	42.5699	0.952099	17	ATGTGATCTAGATCACAATTTTT	GAGCTGAATCGTTTCAGT	+
lac_crp	CysB	14	0.449305	42.684	0.952099	23	ATGTGATCTAGATCACAATTTTT	TTATTATTCCATTTTATTTTTCATTATCCCTTTTTGG	+
lac_crp	Fis	-12	0.487744	46.3357	0.952099	11	ATGTGATCTAGATCACAATTTTT	GCTTATTTTTTAAGC	+
lac_crp	TyrR	1	0.504607	47.9377	0.952099	16	ATGTGATCTAGATCACAATTTTT	TGTAAAGAAAAATTTAC	-
lac_crp	MetJ	2	0.528376	50.1957	0.952099	5	ATGTGATCTAGATCACAATTTTT	AGATGTC	+
lac_crp	FadR	5	0.534103	50.7398	0.952099	11	ATGTGATCTAGATCACAATTTTT	AGCTGGTCTGACCTGT	+
lac_crp	IscR	-11	0.554391	52.6671	0.952099	12	ATGTGATCTAGATCACAATTTTT	TTCACTAATTTACTAGGGTATA	-
lac_crp	GcvA	8	0.556861	52.9018	0.952099	16	ATGTGATCTAGATCACAATTTTT	ATTAGATTATCTAATATGAGTAAT	-
lac_crp	CsgD	-8	0.565965	53.7667	0.952099	11	ATGTGATCTAGATCACAATTTTT	TAACTCACTCG	-
lac_crp	DgsA	0	0.576173	54.7364	0.952099	23	ATGTGATCTAGATCACAATTTTT	TTATTTTACAGTTCGAAATTAAT	+
lac_crp	NhaR	-10	0.593198	56.3538	0.952099	13	ATGTGATCTAGATCACAATTTTT	ATTCGGATTTTACTA	+
lac_crp	PdhR	-5	0.607893	57.7498	0.952099	16	ATGTGATCTAGATCACAATTTTT	ATTGGTCTTACCAATT	-
lac_crp	DnaA	-6	0.617827	58.6936	0.952099	11	ATGTGATCTAGATCACAATTTTT	ATTTATCCACA	+
lac_crp	Rob	-9	0.647804	61.5413	0.952099	14	ATGTGATCTAGATCACAATTTTT	ATGGCACGTATTGTTAA	+
lac_crp	NrdR	-13	0.704016	66.8815	0.952099	10	ATGTGATCTAGATCACAATTTTT	CACAATATATAGGATTT	+
lac_crp	MetR	-10	0.727172	69.0814	0.952099	13	ATGTGATCTAGATCACAATTTTT	CATGCAATTTTTTCA	-
lac_crp	xylR	-12	0.728741	69.2304	0.952099	11	ATGTGATCTAGATCACAATTTTT	TTACGAAATTTGGT	-
lac_crp	NanR	1	0.750318	71.2803	0.952099	4	ATGTGATCTAGATCACAATTTTT	CCTGT	-
lac_crp	TrpR	1	0.764029	72.5828	0.952099	15	ATGTGATCTAGATCACAATTTTT	CTAGTTAACTAGTACA	+
lac_crp	NagC	2	0.78184	74.2748	0.952099	20	ATGTGATCTAGATCACAATTTTT	ACTTATTTCGCATCGTGAAATA	+
lac_crp	UxuR	-6	0.794686	75.4951	0.952099	15	ATGTGATCTAGATCACAATTTTT	AGTGGTTAACCAATT	+
lac_crp	MalT	5	0.804944	76.4697	0.952099	5	ATGTGATCTAGATCACAATTTTT	CGGGGATGAG	+
lac_crp	PhoP	-3	0.829888	78.8394	0.952099	17	ATGTGATCTAGATCACAATTTTT	TAAACAAATGATAAACA	-
lac_crp	MqsA	6	0.835094	79.3339	0.952099	8	ATGTGATCTAGATCACAATTTTT	CCTTTTAGGTGGTT	+
lac_crp	DcuR	-8	0.840786	79.8747	0.952099	15	ATGTGATCTAGATCACAATTTTT	TTAATTTAATTTTTAAA	+
lac_crp	RhaS	-12	0.840786	79.8747	0.952099	11	ATGTGATCTAGATCACAATTTTT	TTGAAATTTCGCCGGTA	+
lac_crp	FhlA	-12	0.846652	80.4319	0.952099	11	ATGTGATCTAGATCACAATTTTT	TGTCCGTTTCGACG	-
lac_crp	FlhDC	-4	0.847931	80.5534	0.952099	16	ATGTGATCTAGATCACAATTTTT	GCTTTTTCGGGCGATT	+
lac_crp	NarL	-12	0.91444	86.8718	0.952099	8	ATGTGATCTAGATCACAATTTTT	TACCCATT	-
lac_crp	CaiF	-13	0.917997	87.2098	0.952099	10	ATGTGATCTAGATCACAATTTTT	AACAATATTGAAAAT	+
lac_crp	PutA	1	0.929374	88.2905	0.952099	9	ATGTGATCTAGATCACAATTTTT	GGTGCAACCT	-
lac_crp	MqsAMqsR	12	0.939121	89.2165	0.952099	7	ATGTGATCTAGATCACAATTTTT	AACTAACCTTTTAGGTGGT	+
lac_crp	GadE	-6	0.945769	89.8481	0.952099	17	ATGTGATCTAGATCACAATTTTT	AGGTTTTTATTATTTAGA	-
lac_crp	RstA	-1	0.948686	90.1251	0.952099	14	ATGTGATCTAGATCACAATTTTT	TGTAACTAAATGTA	-
lac_crp	RutR	-13	0.951317	90.3751	0.952099	10	ATGTGATCTAGATCACAATTTTT	GACCATTTGGTCCACT	+
lac_crp	SlyA	-14	0.955653	90.787	0.952099	9	ATGTGATCTAGATCACAATTTTT	ATATTTAAAGA	+
lac_crp	TorR	-1	0.956304	90.8489	0.952099	9	ATGTGATCTAGATCACAATTTTT	TCTGTTCAT	+
lac_crp	EvgA	-10	0.960903	91.2858	0.952099	13	ATGTGATCTAGATCACAATTTTT	TCTTACAGTTGTAGGAA	-
lac_crp	HipB	2	0.979649	93.0666	0.952099	17	ATGTGATCTAGATCACAATTTTT	TTATCCGCTCTAGGGGATA	-
lac_crp	MntR	15	0.987802	93.8412	0.952099	6	ATGTGATCTAGATCACAATTTTT	AATATAGCAAAAGCTATGTTT	+
lac_crp	RcsAB	0	0.988147	93.874	0.952099	15	ATGTGATCTAGATCACAATTTTT	ATTTAGGATAATCCT	-
lac_crp	PurR	-10	0.993639	94.3957	0.952099	13	ATGTGATCTAGATCACAATTTTT	ACGCAAACGTTTTCCT	+
lac_crp	AsnC	-17	0.994673	94.4939	0.952099	6	ATGTGATCTAGATCACAATTTTT	TTTTTAATGAAT	+
lac_crp	AgaR	5	0.995285	94.552	0.952099	14	ATGTGATCTAGATCACAATTTTT	CTTTCGTTTTCTTTCTTTT	+
lac_crp	NarP	-11	0.996434	94.6613	0.952099	8	ATGTGATCTAGATCACAATTTTT	ATACCCCT	+
lac_crp	marR	-6	0.997122	94.7266	0.952099	14	ATGTGATCTAGATCACAATTTTT	TTGCCCAGGCAACT	-
lac_crp	Dan	-9	0.999625	94.9644	0.952099	7	ATGTGATCTAGATCACAATTTTT	AATTAAC	-
lac_crp	BaeR	-11	0.999812	94.9822	0.952099	12	ATGTGATCTAGATCACAATTTTT	TTCTCCATAATTGGCGC	+
lac_crp	relBE	2	0.999879	94.9885	0.952099	21	ATGTGATCTAGATCACAATTTTT	TGTAAAGACACATGTCAAGACAC	+
marR_marA	marA	0	1.15E-06	0.000109422	0.000206313	17	TTTAGCCAAACGTGGCCT	TTTAGCAAAAAGTGCCA	+
marR_marA	SoxS	0	0.000892667	0.0848034	0.0799477	18	TTTAGCCAAACGTGGCCT	TTTAGCAATTTGTGCCAT	+
marR_marA	DnaA	1	0.00334469	0.317746	0.155369	10	TTTAGCCAAACGTGGCCT	ATTTATCCACA	+
marR_marA	Rob	-1	0.00346958	0.32961	0.155369	17	TTTAGCCAAACGTGGCCT	TTAACAATTCGTGCCAT	-
marR_marA	MarA	1	0.00445953	0.423656	0.159759	18	TTTAGCCAAACGTGGCCT	ATTTAACAATTTGTGCCGT	+
marR_marA	RstA	0	0.00605254	0.574992	0.180689	14	TTTAGCCAAACGTGGCCT	TGTAACTAAATGTA	-
marR_marA	rpoD17	2	0.00926568	0.88024	0.237097	18	TTTAGCCAAACGTGGCCT	ATTATAACAAAAACTAAATAATTTGTCAA	-
marR_marA	rpoD15	2	0.0174499	1.65774	0.344712	18	TTTAGCCAAACGTGGCCT	ATTATACCCTATTCAAAGGGGTGTCAA	-
marR_marA	rpoD19	2	0.0181006	1.71956	0.344712	18	TTTAGCCAAACGTGGCCT	ATTATACCTCAAAACGGATAAAAAGTGTCAA	-
marR_marA	IclR	-3	0.0192446	1.82824	0.344712	7	TTTAGCCAAACGTGGCCT	ATGAAAA	-
marR_marA	OmpR	4	0.0232545	2.20918	0.37867	15	TTTAGCCAAACGTGGCCT	AATATGTAACCAAATATTA	+
marR_marA	relBE	0	0.0289269	2.74806	0.431785	18	TTTAGCCAAACGTGGCCT	TGTAAAGACACATGTCAAGACAC	+
marR_marA	rpoD16	2	0.0331155	3.14597	0.456282	18	TTTAGCCAAACGTGGCCT	ATTATACAGAAAAAATAAAAAATGTCAA	-
marR_marA	xylR	-2	0.041481	3.9407	0.503289	14	TTTAGCCAAACGTGGCCT	TTACGAAATTTGGT	-
marR_marA	GadX	-1	0.042642	4.05099	0.503289	17	TTTAGCCAAACGTGGCCT	ATATAAAAATCAGACATTT	-
marR_marA	FhlA	-3	0.046148	4.38406	0.503289	14	TTTAGCCAAACGTGGCCT	CGTCGAAACTGCCA	+
marR_marA	RutR	0	0.0504706	4.7947	0.503289	16	TTTAGCCAAACGTGGCCT	AGTTGACTAATTGGTC	-
marR_marA	ArcA	1	0.0599269	5.69306	0.523862	14	TTTAGCCAAACGTGGCCT	TGTTAATAATATGTT	-
marR_marA	rpoD18	2	0.0610915	5.80369	0.523862	18	TTTAGCCAAACGTGGCCT	ATTATAACTGTTAAATAAAAACTTTGTCAA	-
marR_marA	AscG	-1	0.0614172	5.83464	0.523862	13	TTTAGCCAAACGTGGCCT	TTTGTGAAACAAG	+
marR_marA	Fis	-2	0.0730601	6.94071	0.545274	15	TTTAGCCAAACGTGGCCT	GCTTAAAAAATAAGC	-
marR_marA	AraC	0	0.0791463	7.5189	0.56707	18	TTTAGCCAAACGTGGCCT	AACAGCAAGATAGTCCATA	-
marR_marA	CytR	3	0.0868552	8.25124	0.579644	15	TTTAGCCAAACGTGGCCT	TTATTTATGCAATTTGTT	+
marR_marA	BaeR	-2	0.0980306	9.31291	0.627119	16	TTTAGCCAAACGTGGCCT	GAGCCAATTATGGAGAA	-
marR_marA	PhoB	0	0.113308	10.7642	0.662199	16	TTTAGCCAAACGTGGCCT	CTGTCATAAAACTGTC	+
marR_marA	NtrC	0	0.117249	11.1386	0.662199	17	TTTAGCCAAACGTGGCCT	TGCACCAAAATGGTGCA	+
marR_marA	NarL	-2	0.121999	11.5899	0.662199	8	TTTAGCCAAACGTGGCCT	TACCCATT	-
marR_marA	GadE	4	0.135156	12.8398	0.712035	14	TTTAGCCAAACGTGGCCT	TGTAAATAATAAAAACCT	+
marR_marA	CpxR	-4	0.146852	13.9509	0.748093	14	TTTAGCCAAACGTGGCCT	GTAAAAATATGTAAA	+
marR_marA	MlrA	7	0.150353	14.2835	0.748093	18	TTTAGCCAAACGTGGCCT	AAAATTGTACAGAAAAAAGTAAATGTACAA	+
marR_marA	FlhDC	0	0.16773	15.9343	0.811997	16	TTTAGCCAAACGTGGCCT	AAACGCCCGAAAAAGC	-
marR_marA	Lrp	-2	0.178429	16.9507	0.835109	12	TTTAGCCAAACGTGGCCT	CAGCATAAAATT	-
marR_marA	PurR	-3	0.206019	19.5718	0.835109	15	TTTAGCCAAACGTGGCCT	ACGCAAACGTTTTCCT	+
marR_marA	CysB	22	0.218514	20.7589	0.835109	15	TTTAGCCAAACGTGGCCT	TTATTATTCCATTTTATTTTTCATTATCCCTTTTTGG	+
marR_marA	TyrR	0	0.219126	20.817	0.835109	17	TTTAGCCAAACGTGGCCT	TGTAAAGAAAAATTTAC	-
marR_marA	PhoP	5	0.219126	20.817	0.835109	12	TTTAGCCAAACGTGGCCT	TAAACAAATGATAAACA	-
marR_marA	LexA	3	0.241325	22.9259	0.882172	17	TTTAGCCAAACGTGGCCT	AACTGTATAAAAAAACAGTA	+
marR_marA	ArgR	10	0.275919	26.2123	0.94274	8	TTTAGCCAAACGTGGCCT	TAAATGAATTTTTATGCA	+
marR_marA	UlaR	6	0.285211	27.095	0.94274	11	TTTAGCCAAACGTGGCCT	GTCAAAATTAATCAAAA	+
marR_marA	NhaR	-2	0.304082	28.8878	0.94274	15	TTTAGCCAAACGTGGCCT	CAGTAAAATCCGAAT	-
marR_marA	MntR	-7	0.313953	29.8256	0.94274	11	TTTAGCCAAACGTGGCCT	AAACATAGCCTTTGCTATATT	-
marR_marA	Cra	-2	0.340408	32.3388	0.94274	16	TTTAGCCAAACGTGGCCT	GAGCTGAATCGTTTCAGT	+
marR_marA	ArgP	2	0.351995	33.4395	0.94274	16	TTTAGCCAAACGTGGCCT	CTTATTGTCTCTTATTGC	+
marR_marA	UxuR	4	0.3881	36.8695	0.94274	11	TTTAGCCAAACGTGGCCT	AGTGGTTAACCAATT	+
marR_marA	NsrR	-8	0.400615	38.0585	0.94274	10	TTTAGCCAAACGTGGCCT	AAGATGCATTT	+
marR_marA	EvgA	9	0.400638	38.0606	0.94274	8	TTTAGCCAAACGTGGCCT	TCTTACAGTTGTAGGAA	-
marR_marA	CRP	-5	0.421736	40.0649	0.94274	13	TTTAGCCAAACGTGGCCT	AAAAATGTGATCTAGATCACAT	-
marR_marA	RcsAB	4	0.427582	40.6203	0.94274	11	TTTAGCCAAACGTGGCCT	AGAATTATCCTAAAA	+
marR_marA	GlpR	1	0.428898	40.7453	0.94274	18	TTTAGCCAAACGTGGCCT	AAATGATCAATAACGAACAT	+
marR_marA	OxyR	3	0.466337	44.302	0.94274	14	TTTAGCCAAACGTGGCCT	AGATTATACCTATCACT	+
marR_marA	marR	3	0.470418	44.6897	0.94274	11	TTTAGCCAAACGTGGCCT	TTGCCCAGGCAACT	-
marR_marA	HNS	3	0.496378	47.1559	0.94274	10	TTTAGCCAAACGTGGCCT	TAATAAAATGAAA	+
marR_marA	AsnC	1	0.504365	47.9146	0.94274	11	TTTAGCCAAACGTGGCCT	AATCAACAAAAA	-
marR_marA	PdhR	5	0.504466	47.9243	0.94274	11	TTTAGCCAAACGTGGCCT	ATTGGTCTTACCAATT	-
marR_marA	IHF	-3	0.556702	52.8866	0.94274	13	TTTAGCCAAACGTGGCCT	AATCAATTAATTA	-
marR_marA	ExuR	-8	0.564046	53.5844	0.94274	10	TTTAGCCAAACGTGGCCT	AAAGTGGTATAACAAAT	+
marR_marA	CsgD	-2	0.570885	54.234	0.94274	11	TTTAGCCAAACGTGGCCT	TAACTCACTCG	-
marR_marA	AgaR	-2	0.571776	54.3188	0.94274	16	TTTAGCCAAACGTGGCCT	AAAAGAAATAAAACGAAAG	-
marR_marA	FNR	4	0.573166	54.4507	0.94274	10	TTTAGCCAAACGTGGCCT	TTGATATAAATCAA	-
marR_marA	NarP	-1	0.579647	55.0665	0.94274	8	TTTAGCCAAACGTGGCCT	ATACCCCT	+
marR_marA	NagC	7	0.58374	55.4553	0.94274	15	TTTAGCCAAACGTGGCCT	TATTTCACGATGCGAAATAAGT	-
marR_marA	GalR	-5	0.64786	61.5467	0.94274	13	TTTAGCCAAACGTGGCCT	GTAACCGATTCCACTG	+
marR_marA	SlyA	2	0.651436	61.8864	0.94274	9	TTTAGCCAAACGTGGCCT	TCTTTAAATAT	-
marR_marA	FadR	-9	0.662077	62.8973	0.94274	9	TTTAGCCAAACGTGGCCT	AGCTGGTCTGACCTGT	+
marR_marA	RhaS	0	0.663386	63.0217	0.94274	17	TTTAGCCAAACGTGGCCT	AAACGTCGAAATTTCAA	-
marR_marA	GalS	-3	0.671404	63.7833	0.94274	15	TTTAGCCAAACGTGGCCT	GTGTAACCGCTTCCA	+
marR_marA	GntR	-1	0.715579	67.98	0.94274	17	TTTAGCCAAACGTGGCCT	TCTGTTACGGGTAACATT	-
marR_marA	ModE	5	0.718225	68.2313	0.94274	18	TTTAGCCAAACGTGGCCT	CGATATGTACAAGATTATATAGCG	+
marR_marA	IscR	13	0.746155	70.8847	0.94274	9	TTTAGCCAAACGTGGCCT	TATACCCTGCTAATTTAGTCAA	+
marR_marA	Nac	-3	0.754198	71.6488	0.94274	15	TTTAGCCAAACGTGGCCT	ATCACATAATAAAAT	-
marR_marA	RcsB	-3	0.760749	72.2712	0.94274	14	TTTAGCCAAACGTGGCCT	ATTAGGATTAATCT	+
marR_marA	NanR	2	0.761923	72.3827	0.94274	3	TTTAGCCAAACGTGGCCT	CCTGT	-
marR_marA	DeoR	0	0.772758	73.412	0.94274	11	TTTAGCCAAACGTGGCCT	TTCTCACAGCA	+
marR_marA	RelBRelE	-4	0.828314	78.6899	0.94274	12	TTTAGCCAAACGTGGCCT	ATTACAACAAGC	+
marR_marA	GcvA	6	0.836996	79.5146	0.94274	18	TTTAGCCAAACGTGGCCT	ATTAGATTATCTAATATGAGTAAT	-
marR_marA	MetR	-2	0.838896	79.6951	0.94274	15	TTTAGCCAAACGTGGCCT	CATGCAATTTTTTCA	-
marR_marA	MqsAMqsR	-1	0.862116	81.901	0.94274	17	TTTAGCCAAACGTGGCCT	ACAACCTAAAAGGATAGTT	-
marR_marA	MelR	6	0.866738	82.3401	0.94274	12	TTTAGCCAAACGTGGCCT	TCTGATTTTCTGGGAATG	-
marR_marA	NrdR	7	0.878984	83.5034	0.94274	10	TTTAGCCAAACGTGGCCT	CACAATATATAGGATTT	+
marR_marA	MqsA	3	0.911372	86.5803	0.94274	11	TTTAGCCAAACGTGGCCT	CCTTTTAGGTGGTT	+
marR_marA	Ada	3	0.915514	86.9738	0.94274	10	TTTAGCCAAACGTGGCCT	AAGCAAAGAGCAA	+
marR_marA	XylR	-5	0.920627	87.4596	0.94274	13	TTTAGCCAAACGTGGCCT	ACAATTACGAATTTTC	-
marR_marA	GadW	2	0.935024	88.8273	0.94274	18	TTTAGCCAAACGTGGCCT	CATTATAATATTAAAATCAG	-
marR_marA	MetJ	-7	0.954394	90.6675	0.94274	7	TTTAGCCAAACGTGGCCT	AGATGTC	+
marR_marA	HipB	0	0.977072	92.8219	0.94274	18	TTTAGCCAAACGTGGCCT	TATCCCCTAGAGCGGATAA	+
marR_marA	DcuR	8	0.980052	93.105	0.94274	9	TTTAGCCAAACGTGGCCT	TTAAAAAATTAAAATAA	-
marR_marA	Dan	-3	0.982391	93.3272	0.94274	7	TTTAGCCAAACGTGGCCT	AATTAAC	-
marR_marA	Fur	-1	0.983644	93.4462	0.94274	17	TTTAGCCAAACGTGGCCT	ATGATAATCATTATCATT	-
marR_marA	LeuO	-7	0.989258	93.9795	0.94274	11	TTTAGCCAAACGTGGCCT	ATTCGCGGTAATTATGAT	+
marR_marA	MalT	-13	0.992136	94.2529	0.94274	5	TTTAGCCAAACGTGGCCT	CTCATCCCCC	-
marR_marA	PutA	2	0.994605	94.4874	0.94274	8	TTTAGCCAAACGTGGCCT	GGTGCAACCT	-
marR_marA	CaiF	3	0.996143	94.6336	0.94274	12	TTTAGCCAAACGTGGCCT	AACAATATTGAAAAT	+
marR_marA	TorR	-1	0.996636	94.6804	0.94274	9	TTTAGCCAAACGTGGCCT	ATGAACAGA	-
marR_marA	DgsA	13	0.999172	94.9213	0.94274	10	TTTAGCCAAACGTGGCCT	ATTAATTTCGAGCTGTAAAATAA	-
marR_marA	TrpR	-1	0.999887	94.9893	0.94274	16	TTTAGCCAAACGTGGCCT	CTAGTTAACTAGTACA	+
rspA_crp	CRP	1	0.000262628	0.0249497	0.0469079	21	TTTTTGTGATGTTACCACGAG	AAAAATGTGATCTAGATCACAT	-
rspA_crp	rpoD16	-3	0.00258402	0.245482	0.230766	18	TTTTTGTGATGTTACCACGAG	TTGACATCTTTTATTTTTTCTATATAAT	+
rspA_crp	rpoD15	-3	0.0122439	1.16317	0.478702	18	TTTTTGTGATGTTACCACGAG	TTGACATCCCTTTGAATAGGGTATAAT	+
rspA_crp	rpoD17	-3	0.0219869	2.08876	0.478702	18	TTTTTGTGATGTTACCACGAG	TTGACAAATTATTTAGTTTCTGTTATAAT	+
rspA_crp	GcvA	5	0.02221	2.10995	0.478702	19	TTTTTGTGATGTTACCACGAG	ATTAGATTATCTAATATGAGTAAT	-
rspA_crp	FNR	-5	0.0329544	3.13066	0.478702	14	TTTTTGTGATGTTACCACGAG	TTGATATAAATCAA	-
rspA_crp	RelBRelE	2	0.034676	3.29422	0.478702	10	TTTTTGTGATGTTACCACGAG	AAAACTTGTAAT	-
rspA_crp	rpoD19	-3	0.0359778	3.41789	0.478702	18	TTTTTGTGATGTTACCACGAG	TTGACATTTTTTTTGTTTTTTGTGGTATAAT	+
rspA_crp	ArgP	1	0.0405262	3.84999	0.478702	17	TTTTTGTGATGTTACCACGAG	CTTATTGTCTCTTATTGC	+
rspA_crp	rpoD18	-2	0.0458839	4.35897	0.478702	19	TTTTTGTGATGTTACCACGAG	ATTATAACTGTTAAATAAAAACTTTGTCAA	-
rspA_crp	MetJ	-6	0.0471258	4.47695	0.478702	7	TTTTTGTGATGTTACCACGAG	AGATGTC	+
rspA_crp	MarA	7	0.0478432	4.5451	0.478702	12	TTTTTGTGATGTTACCACGAG	ATTTAACAATTTGTGCCGT	+
rspA_crp	DeoR	-1	0.0518046	4.92144	0.478702	11	TTTTTGTGATGTTACCACGAG	TGCTGTGAGAA	-
rspA_crp	CpxR	-5	0.0584739	5.55502	0.478702	15	TTTTTGTGATGTTACCACGAG	GTAAAAATATGTAAA	+
rspA_crp	TyrR	-4	0.0602293	5.72179	0.478702	17	TTTTTGTGATGTTACCACGAG	TGTAAAGAAAAATTTAC	-
rspA_crp	Lrp	1	0.0611584	5.81004	0.478702	11	TTTTTGTGATGTTACCACGAG	AATTTTATGCTG	+
rspA_crp	Nac	5	0.0616436	5.85614	0.478702	10	TTTTTGTGATGTTACCACGAG	AATTTATTATGTGAT	+
rspA_crp	LeuO	8	0.0785138	7.45881	0.584305	10	TTTTTGTGATGTTACCACGAG	ATTCGCGGTAATTATGAT	+
rspA_crp	CytR	3	0.086531	8.22044	0.618211	15	TTTTTGTGATGTTACCACGAG	TTATTTATGCAATTTGTT	+
rspA_crp	AscG	0	0.0911014	8.65463	0.62583	13	TTTTTGTGATGTTACCACGAG	TTTGTGAAACAAG	+
rspA_crp	PhoB	6	0.111823	10.6232	0.675031	10	TTTTTGTGATGTTACCACGAG	GACAGTTTTATGACAG	-
rspA_crp	Fis	-1	0.113059	10.7406	0.675031	15	TTTTTGTGATGTTACCACGAG	GCTTAAAAAATAAGC	-
rspA_crp	GadW	1	0.113381	10.7712	0.675031	19	TTTTTGTGATGTTACCACGAG	CTGATTTTAATATTATAATG	+
rspA_crp	CysB	12	0.136888	13.0044	0.788695	21	TTTTTGTGATGTTACCACGAG	TTATTATTCCATTTTATTTTTCATTATCCCTTTTTGG	+
rspA_crp	SoxS	6	0.144267	13.7054	0.805235	12	TTTTTGTGATGTTACCACGAG	TTTAGCAATTTGTGCCAT	+
rspA_crp	GadX	1	0.163726	15.554	0.86009	18	TTTTTGTGATGTTACCACGAG	TAATGTCTGATTTTTATAT	+
rspA_crp	MqsAMqsR	9	0.178305	16.939	0.909915	10	TTTTTGTGATGTTACCACGAG	AACTAACCTTTTAGGTGGT	+
rspA_crp	OmpR	4	0.193887	18.4193	0.940051	15	TTTTTGTGATGTTACCACGAG	TTATATTTGGTTACATATA	-
rspA_crp	AsnC	1	0.195287	18.5523	0.940051	11	TTTTTGTGATGTTACCACGAG	TTTTTAATGAAT	+
rspA_crp	marA	6	0.230206	21.8696	0.940051	11	TTTTTGTGATGTTACCACGAG	TGGCACTTTTTGCTAAA	-
rspA_crp	UlaR	7	0.239701	22.7716	0.940051	10	TTTTTGTGATGTTACCACGAG	TTTTGATTAAATTTGAA	-
rspA_crp	IclR	-3	0.257117	24.4261	0.940051	7	TTTTTGTGATGTTACCACGAG	TTTTCAT	+
rspA_crp	NrdR	9	0.259531	24.6554	0.940051	8	TTTTTGTGATGTTACCACGAG	AAATGCTATATATAGTG	-
rspA_crp	xylR	-1	0.265698	25.2413	0.940051	14	TTTTTGTGATGTTACCACGAG	TTACGAAATTTGGT	-
rspA_crp	NtrC	7	0.280483	26.6459	0.940051	10	TTTTTGTGATGTTACCACGAG	TGCACCATTTTGGTGCA	-
rspA_crp	MelR	-4	0.312864	29.7221	0.940051	17	TTTTTGTGATGTTACCACGAG	TCTGATTTTCTGGGAATG	-
rspA_crp	GntR	-7	0.312864	29.7221	0.940051	14	TTTTTGTGATGTTACCACGAG	GATGTTACCCGTAACAGA	+
rspA_crp	Rob	5	0.313997	29.8297	0.940051	12	TTTTTGTGATGTTACCACGAG	TTAACAATTCGTGCCAT	-
rspA_crp	AraC	-4	0.320972	30.4924	0.940051	17	TTTTTGTGATGTTACCACGAG	TATGGACTATCTTGCTGTT	+
rspA_crp	FlhDC	2	0.336612	31.9781	0.940051	14	TTTTTGTGATGTTACCACGAG	GCTTTTTCGGGCGATT	+
rspA_crp	FadR	-3	0.361617	34.3536	0.940051	16	TTTTTGTGATGTTACCACGAG	AGCTGGTCTGACCTGT	+
rspA_crp	RstA	3	0.361917	34.3821	0.940051	11	TTTTTGTGATGTTACCACGAG	TACATTTAGTTACA	+
rspA_crp	MqsA	3	0.375232	35.647	0.940051	11	TTTTTGTGATGTTACCACGAG	CCTTTTAGGTGGTT	+
rspA_crp	AgaR	7	0.394494	37.4769	0.940051	12	TTTTTGTGATGTTACCACGAG	CTTTCGTTTTCTTTCTTTT	+
rspA_crp	OxyR	-4	0.414841	39.4099	0.940051	17	TTTTTGTGATGTTACCACGAG	AGTGATAGGTATAATCT	-
rspA_crp	ArcA	-3	0.467669	44.4286	0.940051	15	TTTTTGTGATGTTACCACGAG	TGTTAATAATATGTT	-
rspA_crp	IHF	2	0.495948	47.1151	0.940051	11	TTTTTGTGATGTTACCACGAG	TAATTAATTGATT	+
rspA_crp	GadE	3	0.51037	48.4852	0.940051	15	TTTTTGTGATGTTACCACGAG	AGGTTTTTATTATTTAGA	-
rspA_crp	Ada	-3	0.527141	50.0784	0.940051	13	TTTTTGTGATGTTACCACGAG	TTGCGCTTTGATT	-
rspA_crp	PutA	-2	0.538308	51.1392	0.940051	10	TTTTTGTGATGTTACCACGAG	GGTGCAACCT	-
rspA_crp	IscR	-2	0.557493	52.9619	0.940051	19	TTTTTGTGATGTTACCACGAG	TTCACTAATTTACTAGGGTATA	-
rspA_crp	ModE	-4	0.597343	56.7476	0.940051	17	TTTTTGTGATGTTACCACGAG	CGCTATATAATTTTGTATATATCG	-
rspA_crp	DnaA	-4	0.627639	59.6258	0.940051	11	TTTTTGTGATGTTACCACGAG	TGTGGATAACT	-
rspA_crp	CsgD	-7	0.644152	61.1945	0.940051	11	TTTTTGTGATGTTACCACGAG	TAACTCACTCG	-
rspA_crp	RcsB	-2	0.645421	61.315	0.940051	14	TTTTTGTGATGTTACCACGAG	ATTAGGATTAATCT	+
rspA_crp	NanR	-2	0.655102	62.2347	0.940051	5	TTTTTGTGATGTTACCACGAG	CCTGT	-
rspA_crp	relBE	-4	0.656995	62.4145	0.940051	17	TTTTTGTGATGTTACCACGAG	TGTAAAGACACATGTCAAGACAC	+
rspA_crp	DcuR	8	0.662807	62.9667	0.940051	9	TTTTTGTGATGTTACCACGAG	TTAATTTAATTTTTAAA	+
rspA_crp	SlyA	2	0.692986	65.8336	0.940051	9	TTTTTGTGATGTTACCACGAG	ATATTTAAAGA	+
rspA_crp	RhaS	-5	0.706246	67.0934	0.940051	16	TTTTTGTGATGTTACCACGAG	TTGAAATTTCGCCGGTA	+
rspA_crp	HNS	-6	0.715694	67.991	0.940051	13	TTTTTGTGATGTTACCACGAG	TAATAAAATGAAA	+
rspA_crp	LexA	7	0.72487	68.8627	0.940051	13	TTTTTGTGATGTTACCACGAG	TACTGTTTTTTTATACAGTT	-
rspA_crp	NagC	-7	0.727271	69.0908	0.940051	14	TTTTTGTGATGTTACCACGAG	TATTTCACGATGCGAAATAAGT	-
rspA_crp	GlpR	8	0.751613	71.4032	0.940051	12	TTTTTGTGATGTTACCACGAG	ATGTTCGTTATTGATCATTT	-
rspA_crp	PhoP	-6	0.787423	74.8052	0.940051	15	TTTTTGTGATGTTACCACGAG	TAAACAAATGATAAACA	-
rspA_crp	NhaR	7	0.80528	76.5016	0.940051	8	TTTTTGTGATGTTACCACGAG	ATTCGGATTTTACTA	+
rspA_crp	Fur	7	0.806436	76.6114	0.940051	11	TTTTTGTGATGTTACCACGAG	ATGATAATCATTATCATT	-
rspA_crp	PdhR	-4	0.827892	78.6498	0.940051	16	TTTTTGTGATGTTACCACGAG	ATTGGTCTTACCAATT	-
rspA_crp	GalS	-3	0.829624	78.8143	0.940051	15	TTTTTGTGATGTTACCACGAG	GTGTAACCGCTTCCA	+
rspA_crp	NarL	-15	0.832178	79.057	0.940051	6	TTTTTGTGATGTTACCACGAG	AATGGGTA	+
rspA_crp	MlrA	-3	0.834024	79.2323	0.940051	18	TTTTTGTGATGTTACCACGAG	TTGTACATTTACGTTTTTCTGTACAATTTT	-
rspA_crp	MntR	8	0.837387	79.5517	0.940051	13	TTTTTGTGATGTTACCACGAG	AAACATAGCCTTTGCTATATT	-
rspA_crp	FhlA	5	0.852094	80.9489	0.940051	9	TTTTTGTGATGTTACCACGAG	TGTCCGTTTCGACG	-
rspA_crp	XylR	10	0.861045	81.7992	0.940051	6	TTTTTGTGATGTTACCACGAG	ACAATTACGAATTTTC	-
rspA_crp	ArgR	-2	0.862055	81.8952	0.940051	18	TTTTTGTGATGTTACCACGAG	TAAATGAATTTTTATGCA	+
rspA_crp	TorR	-5	0.864002	82.0802	0.940051	9	TTTTTGTGATGTTACCACGAG	ATGAACAGA	-
rspA_crp	MetR	7	0.873356	82.9688	0.940051	8	TTTTTGTGATGTTACCACGAG	TGAAAAATTTTCATT	+
rspA_crp	marR	-1	0.873492	82.9818	0.940051	14	TTTTTGTGATGTTACCACGAG	AGTTGCCTGGGCAA	+
rspA_crp	PurR	9	0.899222	85.4261	0.940051	7	TTTTTGTGATGTTACCACGAG	ACGCAAACGTTTTCCT	+
rspA_crp	Cra	0	0.907486	86.2112	0.940051	18	TTTTTGTGATGTTACCACGAG	GAGCTGAATCGTTTCAGT	+
rspA_crp	MalT	-14	0.932753	88.6116	0.940051	7	TTTTTGTGATGTTACCACGAG	CGGGGATGAG	+
rspA_crp	CaiF	7	0.960879	91.2835	0.940051	8	TTTTTGTGATGTTACCACGAG	ACTTTCAATATTGGT	-
rspA_crp	RcsAB	-1	0.965331	91.7064	0.940051	15	TTTTTGTGATGTTACCACGAG	ATTTAGGATAATCCT	-
rspA_crp	Dan	-5	0.967589	91.9209	0.940051	7	TTTTTGTGATGTTACCACGAG	GTTAATT	+
rspA_crp	BaeR	7	0.96932	92.0854	0.940051	10	TTTTTGTGATGTTACCACGAG	GAGCCAATTATGGAGAA	-
rspA_crp	DgsA	0	0.984269	93.5056	0.940051	21	TTTTTGTGATGTTACCACGAG	TTATTTTACAGTTCGAAATTAAT	+
rspA_crp	EvgA	8	0.986383	93.7064	0.940051	9	TTTTTGTGATGTTACCACGAG	TTCCTACAACTGTAAGA	+
rspA_crp	HipB	-4	0.994146	94.4439	0.940051	17	TTTTTGTGATGTTACCACGAG	TATCCCCTAGAGCGGATAA	+
rspA_crp	RutR	4	0.995554	94.5777	0.940051	12	TTTTTGTGATGTTACCACGAG	GACCATTTGGTCCACT	+
rspA_crp	GalR	-5	0.996321	94.6505	0.940051	16	TTTTTGTGATGTTACCACGAG	GTAACCGATTCCACTG	+
rspA_crp	NarP	-16	0.997863	94.797	0.940051	5	TTTTTGTGATGTTACCACGAG	AGGGGTAG	-
rspA_crp	NsrR	8	0.998981	94.9032	0.940051	3	TTTTTGTGATGTTACCACGAG	AAATGCATCTT	-
rspA_crp	ExuR	-1	0.999833	94.9841	0.940051	17	TTTTTGTGATGTTACCACGAG	ATTTGTTTAACCACTTT	-
rspA_crp	UxuR	13	0.999908	94.9913	0.940051	2	TTTTTGTGATGTTACCACGAG	AGTGGTTAACCAATT	+
rspA_crp	TrpR	8	0.999983	94.9984	0.940051	8	TTTTTGTGATGTTACCACGAG	TGTACTAGTTAACTAG	-
xylA_left_xylR	xylR	0	0.000446571	0.0424242	0.084826	14	TTGTGTAATTTCGC	TTACGAAATTTGGT	-
xylA_left_xylR	XylR	4	0.00927426	0.881055	0.747763	12	TTGTGTAATTTCGC	ACAATTACGAATTTTC	-
xylA_left_xylR	GlpR	2	0.0131508	1.24933	0.747763	14	TTGTGTAATTTCGC	AAATGATCAATAACGAACAT	+
xylA_left_xylR	FNR	0	0.0157465	1.49592	0.747763	14	TTGTGTAATTTCGC	TTGATTTATATCAA	+
xylA_left_xylR	CpxR	1	0.0440376	4.18357	0.97707	14	TTGTGTAATTTCGC	TTTACATATTTTTAC	-
xylA_left_xylR	AgaR	3	0.0501191	4.76132	0.97707	14	TTGTGTAATTTCGC	CTTTCGTTTTCTTTCTTTT	+
xylA_left_xylR	RhaS	-2	0.0502914	4.77768	0.97707	12	TTGTGTAATTTCGC	TTGAAATTTCGCCGGTA	+
xylA_left_xylR	HNS	1	0.0511373	4.85804	0.97707	12	TTGTGTAATTTCGC	TTTCATTTTATTA	-
xylA_left_xylR	Dan	-4	0.0523324	4.97158	0.97707	7	TTGTGTAATTTCGC	GTTAATT	+
xylA_left_xylR	NagC	-3	0.0546007	5.18706	0.97707	11	TTGTGTAATTTCGC	ACTTATTTCGCATCGTGAAATA	+
xylA_left_xylR	CRP	2	0.0605812	5.75521	0.97707	14	TTGTGTAATTTCGC	ATGTGATCTAGATCACATTTTT	+
xylA_left_xylR	ArgP	4	0.0638034	6.06132	0.97707	14	TTGTGTAATTTCGC	CTTATTGTCTCTTATTGC	+
xylA_left_xylR	RcsAB	2	0.0668698	6.35263	0.97707	13	TTGTGTAATTTCGC	ATTTAGGATAATCCT	-
xylA_left_xylR	relBE	-3	0.0933205	8.86545	0.999736	11	TTGTGTAATTTCGC	TGTAAAGACACATGTCAAGACAC	+
xylA_left_xylR	GadX	2	0.101146	9.60889	0.999736	14	TTGTGTAATTTCGC	TAATGTCTGATTTTTATAT	+
xylA_left_xylR	MarA	0	0.101146	9.60889	0.999736	14	TTGTGTAATTTCGC	ATTTAACAATTTGTGCCGT	+
xylA_left_xylR	FlhDC	-4	0.101582	9.65025	0.999736	10	TTGTGTAATTTCGC	GCTTTTTCGGGCGATT	+
xylA_left_xylR	rpoD16	0	0.105297	10.0032	0.999736	14	TTGTGTAATTTCGC	TTGACATCTTTTATTTTTTCTATATAAT	+
xylA_left_xylR	AraC	1	0.111243	10.5681	0.999736	14	TTGTGTAATTTCGC	TATGGACTATCTTGCTGTT	+
xylA_left_xylR	IscR	0	0.115326	10.9559	0.999736	14	TTGTGTAATTTCGC	TTCACTAATTTACTAGGGTATA	-
xylA_left_xylR	DgsA	-3	0.118703	11.2768	0.999736	11	TTGTGTAATTTCGC	ATTAATTTCGAGCTGTAAAATAA	-
xylA_left_xylR	SoxS	1	0.131958	12.536	0.999736	14	TTGTGTAATTTCGC	TTTAGCAATTTGTGCCAT	+
xylA_left_xylR	ArgR	-1	0.131958	12.536	0.999736	13	TTGTGTAATTTCGC	TGCATAAAAATTCATTTA	-
xylA_left_xylR	rpoD17	0	0.1344	12.768	0.999736	14	TTGTGTAATTTCGC	TTGACAAATTATTTAGTTTCTGTTATAAT	+
xylA_left_xylR	LeuO	2	0.165274	15.701	0.999736	14	TTGTGTAATTTCGC	ATTCGCGGTAATTATGAT	+
xylA_left_xylR	DcuR	0	0.183568	17.439	0.999736	14	TTGTGTAATTTCGC	TTAATTTAATTTTTAAA	+
xylA_left_xylR	OxyR	4	0.208631	19.82	0.999736	13	TTGTGTAATTTCGC	AGTGATAGGTATAATCT	-
xylA_left_xylR	CytR	6	0.222869	21.1725	0.999736	12	TTGTGTAATTTCGC	AATAGATTGCATAAATAT	-
xylA_left_xylR	Fis	-2	0.225677	21.4393	0.999736	12	TTGTGTAATTTCGC	GCTTATTTTTTAAGC	+
xylA_left_xylR	GadE	4	0.232212	22.0601	0.999736	14	TTGTGTAATTTCGC	AGGTTTTTATTATTTAGA	-
xylA_left_xylR	ModE	2	0.245656	23.3374	0.999736	14	TTGTGTAATTTCGC	CGCTATATAATTTTGTATATATCG	-
xylA_left_xylR	TyrR	-3	0.256088	24.3283	0.999736	11	TTGTGTAATTTCGC	TGTAAAGAAAAATTTAC	-
xylA_left_xylR	IclR	1	0.283392	26.9223	0.999736	6	TTGTGTAATTTCGC	TTTTCAT	+
xylA_left_xylR	DnaA	-7	0.289084	27.463	0.999736	7	TTGTGTAATTTCGC	ATTTATCCACA	+
xylA_left_xylR	rpoD18	0	0.305455	29.0182	0.999736	14	TTGTGTAATTTCGC	TTGACAAAGTTATTATTTAACAGGTATAAT	+
xylA_left_xylR	Rob	0	0.310821	29.528	0.999736	14	TTGTGTAATTTCGC	TTAACAATTCGTGCCAT	-
xylA_left_xylR	Nac	1	0.311004	29.5454	0.999736	14	TTGTGTAATTTCGC	AATTTATTATGTGAT	+
xylA_left_xylR	CysB	10	0.32186	30.5767	0.999736	14	TTGTGTAATTTCGC	TTATTATTCCATTTTATTTTTCATTATCCCTTTTTGG	+
xylA_left_xylR	SlyA	-1	0.357047	33.9195	0.999736	11	TTGTGTAATTTCGC	TCTTTAAATAT	-
xylA_left_xylR	UlaR	2	0.359743	34.1755	0.999736	14	TTGTGTAATTTCGC	TTTTGATTAAATTTGAA	-
xylA_left_xylR	LexA	2	0.372328	35.3712	0.999736	14	TTGTGTAATTTCGC	TACTGTTTTTTTATACAGTT	-
xylA_left_xylR	PurR	10	0.375313	35.6547	0.999736	6	TTGTGTAATTTCGC	AGGAAAACGTTTGCGT	-
xylA_left_xylR	Lrp	-2	0.380131	36.1124	0.999736	12	TTGTGTAATTTCGC	AATTTTATGCTG	+
xylA_left_xylR	MlrA	0	0.381216	36.2155	0.999736	14	TTGTGTAATTTCGC	TTGTACATTTACGTTTTTCTGTACAATTTT	-
xylA_left_xylR	marA	-1	0.385816	36.6525	0.999736	13	TTGTGTAATTTCGC	TGGCACTTTTTGCTAAA	-
xylA_left_xylR	OmpR	5	0.410619	39.0088	0.999736	14	TTGTGTAATTTCGC	TTATATTTGGTTACATATA	-
xylA_left_xylR	NarL	1	0.416689	39.5854	0.999736	7	TTGTGTAATTTCGC	AATGGGTA	+
xylA_left_xylR	RelBRelE	3	0.424729	40.3492	0.999736	9	TTGTGTAATTTCGC	AAAACTTGTAAT	-
xylA_left_xylR	NhaR	1	0.472992	44.9342	0.999736	14	TTGTGTAATTTCGC	ATTCGGATTTTACTA	+
xylA_left_xylR	PhoB	7	0.488132	46.3726	0.999736	9	TTGTGTAATTTCGC	GACAGTTTTATGACAG	-
xylA_left_xylR	IHF	3	0.503645	47.8463	0.999736	10	TTGTGTAATTTCGC	TAATTAATTGATT	+
xylA_left_xylR	FhlA	-2	0.513827	48.8136	0.999736	12	TTGTGTAATTTCGC	TGTCCGTTTCGACG	-
xylA_left_xylR	PhoP	-1	0.514038	48.8337	0.999736	13	TTGTGTAATTTCGC	TGTTTATCATTTGTTTA	+
xylA_left_xylR	PdhR	1	0.518183	49.2274	0.999736	14	TTGTGTAATTTCGC	AATTGGTAAGACCAAT	+
xylA_left_xylR	ArcA	-3	0.533742	50.7055	0.999736	11	TTGTGTAATTTCGC	TGTTAATAATATGTT	-
xylA_left_xylR	MqsAMqsR	10	0.540809	51.3769	0.999736	9	TTGTGTAATTTCGC	AACTAACCTTTTAGGTGGT	+
xylA_left_xylR	NtrC	10	0.544262	51.7049	0.999736	7	TTGTGTAATTTCGC	TGCACCATTTTGGTGCA	-
xylA_left_xylR	CsgD	-6	0.585187	55.5928	0.999736	8	TTGTGTAATTTCGC	TAACTCACTCG	-
xylA_left_xylR	MntR	9	0.587263	55.79	0.999736	12	TTGTGTAATTTCGC	AAACATAGCCTTTGCTATATT	-
xylA_left_xylR	rpoD19	10	0.589032	55.9581	0.999736	14	TTGTGTAATTTCGC	TTGACATTTTTTTTGTTTTTTGTGGTATAAT	+
xylA_left_xylR	BaeR	-9	0.590113	56.0607	0.999736	5	TTGTGTAATTTCGC	TTCTCCATAATTGGCGC	+
xylA_left_xylR	RcsB	1	0.592721	56.3085	0.999736	13	TTGTGTAATTTCGC	ATTAGGATTAATCT	+
xylA_left_xylR	MqsA	4	0.592721	56.3085	0.999736	10	TTGTGTAATTTCGC	CCTTTTAGGTGGTT	+
xylA_left_xylR	rpoD15	0	0.593305	56.364	0.999736	14	TTGTGTAATTTCGC	TTGACATCCCTTTGAATAGGGTATAAT	+
xylA_left_xylR	MetJ	-6	0.602183	57.2073	0.999736	7	TTGTGTAATTTCGC	GACATCT	-
xylA_left_xylR	DeoR	0	0.602546	57.2418	0.999736	11	TTGTGTAATTTCGC	TGCTGTGAGAA	-
xylA_left_xylR	GadW	4	0.603081	57.2927	0.999736	14	TTGTGTAATTTCGC	CTGATTTTAATATTATAATG	+
xylA_left_xylR	TorR	-1	0.605173	57.4915	0.999736	9	TTGTGTAATTTCGC	TCTGTTCAT	+
xylA_left_xylR	GcvA	6	0.619659	58.8676	0.999736	14	TTGTGTAATTTCGC	ATTAGATTATCTAATATGAGTAAT	-
xylA_left_xylR	GalR	-2	0.641207	60.9146	0.999736	12	TTGTGTAATTTCGC	CAGTGGAATCGTTTAC	-
xylA_left_xylR	Ada	7	0.681086	64.7032	0.999736	6	TTGTGTAATTTCGC	TTGCGCTTTGATT	-
xylA_left_xylR	NsrR	-6	0.70488	66.9636	0.999736	8	TTGTGTAATTTCGC	AAATGCATCTT	-
xylA_left_xylR	Cra	8	0.716971	68.1122	0.999736	10	TTGTGTAATTTCGC	GAGCTGAATCGTTTCAGT	+
xylA_left_xylR	ExuR	2	0.72531	68.9044	0.999736	14	TTGTGTAATTTCGC	ATTTGTTTAACCACTTT	-
xylA_left_xylR	GntR	6	0.745313	70.8047	0.999736	12	TTGTGTAATTTCGC	TCTGTTACGGGTAACATT	-
xylA_left_xylR	MelR	7	0.772612	73.3982	0.999736	11	TTGTGTAATTTCGC	TCTGATTTTCTGGGAATG	-
xylA_left_xylR	GalS	-2	0.789305	74.984	0.999736	12	TTGTGTAATTTCGC	GTGTAACCGCTTCCA	+
xylA_left_xylR	CaiF	10	0.789305	74.984	0.999736	5	TTGTGTAATTTCGC	ACTTTCAATATTGGT	-
xylA_left_xylR	marR	-9	0.789427	74.9955	0.999736	5	TTGTGTAATTTCGC	TTGCCCAGGCAACT	-
xylA_left_xylR	NrdR	12	0.806473	76.6149	0.999736	5	TTGTGTAATTTCGC	AAATGCTATATATAGTG	-
xylA_left_xylR	RutR	2	0.812034	77.1432	0.999736	14	TTGTGTAATTTCGC	AGTTGACTAATTGGTC	-
xylA_left_xylR	AsnC	2	0.846352	80.4035	0.999736	10	TTGTGTAATTTCGC	TTTTTAATGAAT	+
xylA_left_xylR	Fur	1	0.85737	81.4501	0.999736	14	TTGTGTAATTTCGC	ATGATAATCATTATCATT	-
xylA_left_xylR	MetR	-1	0.862086	81.8982	0.999736	13	TTGTGTAATTTCGC	CATGCAATTTTTTCA	-
xylA_left_xylR	NarP	0	0.865293	82.2028	0.999736	8	TTGTGTAATTTCGC	AGGGGTAG	-
xylA_left_xylR	RstA	4	0.934848	88.8106	0.999736	10	TTGTGTAATTTCGC	TACATTTAGTTACA	+
xylA_left_xylR	PutA	-7	0.943123	89.5967	0.999736	7	TTGTGTAATTTCGC	AGGTTGCACC	+
xylA_left_xylR	TrpR	-1	0.959905	91.191	0.999736	13	TTGTGTAATTTCGC	TGTACTAGTTAACTAG	-
xylA_left_xylR	NanR	-1	0.983423	93.4252	0.999736	5	TTGTGTAATTTCGC	CCTGT	-
xylA_left_xylR	MalT	-9	0.985041	93.5789	0.999736	5	TTGTGTAATTTCGC	CTCATCCCCC	-
xylA_left_xylR	UxuR	2	0.985629	93.6348	0.999736	13	TTGTGTAATTTCGC	AATTGGTTAACCACA	-
xylA_left_xylR	FadR	5	0.990272	94.0759	0.999736	11	TTGTGTAATTTCGC	AGCTGGTCTGACCTGT	+
xylA_left_xylR	AscG	1	0.990963	94.1415	0.999736	12	TTGTGTAATTTCGC	CATGTTTCACAGA	-
xylA_left_xylR	EvgA	-10	0.997468	94.7595	0.999736	4	TTGTGTAATTTCGC	TCTTACAGTTGTAGGAA	-
xylA_left_xylR	HipB	0	0.998698	94.8763	0.999736	14	TTGTGTAATTTCGC	TTATCCGCTCTAGGGGATA	-
xylA_right_xylR	XylR	-3	0.000412629	0.0391997	0.0771074	15	TGTAACAATATGTAATTG	GAAAAATCATAATTGA	+
xylA_right_xylR	OmpR	4	0.00375963	0.357165	0.33067	15	TGTAACAATATGTAATTG	AATATGTAACCAAATATTA	+
xylA_right_xylR	CpxR	-1	0.00641553	0.609476	0.33067	15	TGTAACAATATGTAATTG	GTAAAAATATGTAAA	+
xylA_right_xylR	IHF	-2	0.00707812	0.672422	0.33067	13	TGTAACAATATGTAATTG	AATCAATTAATTA	-
xylA_right_xylR	MlrA	7	0.00938829	0.891888	0.350876	18	TGTAACAATATGTAATTG	AAAATTGTACAGAAAAAAGTAAATGTACAA	+
xylA_right_xylR	ArgR	0	0.0156127	1.48321	0.486254	18	TGTAACAATATGTAATTG	TGCATAAAAATTCATTTA	-
xylA_right_xylR	ArcA	-6	0.0186194	1.76884	0.497055	12	TGTAACAATATGTAATTG	AACATATTATTAACA	+
xylA_right_xylR	Lrp	1	0.0603699	5.73514	0.983519	11	TGTAACAATATGTAATTG	CAGCATAAAATT	-
xylA_right_xylR	RstA	0	0.0679002	6.45051	0.983519	14	TGTAACAATATGTAATTG	TGTAACTAAATGTA	-
xylA_right_xylR	PhoP	-1	0.0723312	6.87147	0.983519	17	TGTAACAATATGTAATTG	TAAACAAATGATAAACA	-
xylA_right_xylR	marR	-13	0.0990146	9.40639	0.983519	5	TGTAACAATATGTAATTG	AGTTGCCTGGGCAA	+
xylA_right_xylR	ArgP	-1	0.100082	9.5078	0.983519	17	TGTAACAATATGTAATTG	GTTATAAGTCACAATAAG	-
xylA_right_xylR	UxuR	-13	0.103566	9.8388	0.983519	5	TGTAACAATATGTAATTG	AATTGGTTAACCACA	-
xylA_right_xylR	rpoD16	6	0.116822	11.0981	0.983519	18	TGTAACAATATGTAATTG	ATTATACAGAAAAAATAAAAAATGTCAA	-
xylA_right_xylR	rpoD17	1	0.13551	12.8734	0.983519	18	TGTAACAATATGTAATTG	TTGACAAATTATTTAGTTTCTGTTATAAT	+
xylA_right_xylR	GadX	1	0.144936	13.7689	0.983519	18	TGTAACAATATGTAATTG	ATATAAAAATCAGACATTT	-
xylA_right_xylR	Fis	1	0.145852	13.8559	0.983519	14	TGTAACAATATGTAATTG	GCTTAAAAAATAAGC	-
xylA_right_xylR	SoxS	2	0.164265	15.6051	0.983519	16	TGTAACAATATGTAATTG	ATGGCACAAATTGTTAAA	-
xylA_right_xylR	Nac	-1	0.167904	15.9509	0.983519	15	TGTAACAATATGTAATTG	ATCACATAATAAAAT	-
xylA_right_xylR	LexA	3	0.170541	16.2014	0.983519	17	TGTAACAATATGTAATTG	AACTGTATAAAAAAACAGTA	+
xylA_right_xylR	HNS	-2	0.175284	16.652	0.983519	13	TGTAACAATATGTAATTG	TAATAAAATGAAA	+
xylA_right_xylR	Dan	-10	0.189687	18.0203	0.983519	7	TGTAACAATATGTAATTG	GTTAATT	+
xylA_right_xylR	GcvA	8	0.191673	18.209	0.983519	16	TGTAACAATATGTAATTG	AATAATCAAATGAAAAAAACTAAT	+
xylA_right_xylR	rpoD18	8	0.192556	18.2928	0.983519	18	TGTAACAATATGTAATTG	ATTATAACTGTTAAATAAAAACTTTGTCAA	-
xylA_right_xylR	rpoD15	2	0.199637	18.9655	0.983519	18	TGTAACAATATGTAATTG	ATTATACCCTATTCAAAGGGGTGTCAA	-
xylA_right_xylR	MarA	2	0.229418	21.7947	0.983519	17	TGTAACAATATGTAATTG	ACGGCACAAATTGTTAAAT	-
xylA_right_xylR	NsrR	-6	0.236998	22.5148	0.983519	11	TGTAACAATATGTAATTG	AAGATGCATTT	+
xylA_right_xylR	IscR	-2	0.262047	24.8944	0.983519	16	TGTAACAATATGTAATTG	TATACCCTGCTAATTTAGTCAA	+
xylA_right_xylR	rpoD19	9	0.266214	25.2904	0.983519	18	TGTAACAATATGTAATTG	ATTATACCTCAAAACGGATAAAAAGTGTCAA	-
xylA_right_xylR	Rob	2	0.27645	26.2627	0.983519	15	TGTAACAATATGTAATTG	ATGGCACGTATTGTTAA	+
xylA_right_xylR	CysB	16	0.312077	29.6473	0.983519	18	TGTAACAATATGTAATTG	CCATATAGTGATAATGACAAATAAAATGGAATAATAA	-
xylA_right_xylR	Fur	1	0.312209	29.6598	0.983519	17	TGTAACAATATGTAATTG	ATGATAATCATTATCATT	-
xylA_right_xylR	CsgD	4	0.315336	29.9569	0.983519	7	TGTAACAATATGTAATTG	CGAGTGAGTTA	+
xylA_right_xylR	GadW	1	0.318434	30.2512	0.983519	18	TGTAACAATATGTAATTG	CATTATAATATTAAAATCAG	-
xylA_right_xylR	NarL	-6	0.320842	30.48	0.983519	8	TGTAACAATATGTAATTG	AATGGGTA	+
xylA_right_xylR	PdhR	-13	0.340624	32.3593	0.983519	5	TGTAACAATATGTAATTG	AATTGGTAAGACCAAT	+
xylA_right_xylR	CytR	-9	0.360295	34.228	0.983519	9	TGTAACAATATGTAATTG	AATAGATTGCATAAATAT	-
xylA_right_xylR	AgaR	-2	0.370907	35.2362	0.983519	16	TGTAACAATATGTAATTG	AAAAGAAATAAAACGAAAG	-
xylA_right_xylR	NagC	-9	0.386185	36.6876	0.983519	9	TGTAACAATATGTAATTG	ACTTATTTCGCATCGTGAAATA	+
xylA_right_xylR	ModE	-5	0.398432	37.851	0.983519	13	TGTAACAATATGTAATTG	CGCTATATAATTTTGTATATATCG	-
xylA_right_xylR	CRP	-5	0.39893	37.8984	0.983519	13	TGTAACAATATGTAATTG	AAAAATGTGATCTAGATCACAT	-
xylA_right_xylR	AsnC	1	0.431375	40.9806	0.983519	11	TGTAACAATATGTAATTG	AATCAACAAAAA	-
xylA_right_xylR	RelBRelE	-10	0.431375	40.9806	0.983519	8	TGTAACAATATGTAATTG	AAAACTTGTAAT	-
xylA_right_xylR	AraC	-3	0.450627	42.8095	0.983519	15	TGTAACAATATGTAATTG	AACAGCAAGATAGTCCATA	-
xylA_right_xylR	GalS	1	0.473418	44.9747	0.983519	14	TGTAACAATATGTAATTG	GTGTAACCGCTTCCA	+
xylA_right_xylR	PutA	-12	0.502873	47.7729	0.983519	6	TGTAACAATATGTAATTG	AGGTTGCACC	+
xylA_right_xylR	FNR	6	0.510825	48.5284	0.983519	8	TGTAACAATATGTAATTG	TTGATATAAATCAA	-
xylA_right_xylR	DcuR	-7	0.527887	50.1493	0.983519	11	TGTAACAATATGTAATTG	TTAAAAAATTAAAATAA	-
xylA_right_xylR	SlyA	-11	0.529443	50.2971	0.983519	7	TGTAACAATATGTAATTG	ATATTTAAAGA	+
xylA_right_xylR	TyrR	0	0.543044	51.5892	0.983519	17	TGTAACAATATGTAATTG	TGTAAAGAAAAATTTAC	-
xylA_right_xylR	GalR	-1	0.572278	54.3664	0.983519	16	TGTAACAATATGTAATTG	GTAACCGATTCCACTG	+
xylA_right_xylR	IclR	-3	0.582175	55.3066	0.983519	7	TGTAACAATATGTAATTG	ATGAAAA	-
xylA_right_xylR	Ada	-15	0.582787	55.3647	0.983519	3	TGTAACAATATGTAATTG	TTGCGCTTTGATT	-
xylA_right_xylR	PhoB	1	0.619271	58.8307	0.983519	15	TGTAACAATATGTAATTG	CTGTCATAAAACTGTC	+
xylA_right_xylR	OxyR	0	0.634981	60.3232	0.983519	17	TGTAACAATATGTAATTG	AGATTATACCTATCACT	+
xylA_right_xylR	TorR	-3	0.701457	66.6384	0.983519	9	TGTAACAATATGTAATTG	ATGAACAGA	-
xylA_right_xylR	EvgA	9	0.724479	68.8255	0.983519	8	TGTAACAATATGTAATTG	TCTTACAGTTGTAGGAA	-
xylA_right_xylR	ExuR	-13	0.724479	68.8255	0.983519	5	TGTAACAATATGTAATTG	ATTTGTTTAACCACTTT	-
xylA_right_xylR	DgsA	-10	0.762483	72.4359	0.983519	8	TGTAACAATATGTAATTG	ATTAATTTCGAGCTGTAAAATAA	-
xylA_right_xylR	MetJ	3	0.76818	72.9771	0.983519	4	TGTAACAATATGTAATTG	AGATGTC	+
xylA_right_xylR	GadE	4	0.788197	74.8787	0.983519	14	TGTAACAATATGTAATTG	TGTAAATAATAAAAACCT	+
xylA_right_xylR	FlhDC	3	0.795861	75.6068	0.983519	13	TGTAACAATATGTAATTG	AAACGCCCGAAAAAGC	-
xylA_right_xylR	marA	0	0.805888	76.5594	0.983519	17	TGTAACAATATGTAATTG	TTTAGCAAAAAGTGCCA	+
xylA_right_xylR	RutR	-13	0.821331	78.0264	0.983519	5	TGTAACAATATGTAATTG	AGTTGACTAATTGGTC	-
xylA_right_xylR	AscG	-12	0.832487	79.0863	0.983519	6	TGTAACAATATGTAATTG	TTTGTGAAACAAG	+
xylA_right_xylR	DeoR	3	0.84638	80.4061	0.983519	8	TGTAACAATATGTAATTG	TGCTGTGAGAA	-
xylA_right_xylR	xylR	-9	0.846784	80.4445	0.983519	9	TGTAACAATATGTAATTG	ACCAAATTTCGTAA	+
xylA_right_xylR	DnaA	2	0.859157	81.6199	0.983519	9	TGTAACAATATGTAATTG	TGTGGATAACT	-
xylA_right_xylR	TrpR	-10	0.877542	83.3665	0.983519	8	TGTAACAATATGTAATTG	TGTACTAGTTAACTAG	-
xylA_right_xylR	LeuO	-4	0.888618	84.4187	0.983519	14	TGTAACAATATGTAATTG	ATTCGCGGTAATTATGAT	+
xylA_right_xylR	MqsA	-5	0.89043	84.5909	0.983519	13	TGTAACAATATGTAATTG	AATCACCTAAAAGG	-
xylA_right_xylR	GntR	9	0.90619	86.088	0.983519	9	TGTAACAATATGTAATTG	GATGTTACCCGTAACAGA	+
xylA_right_xylR	NarP	-7	0.910281	86.4767	0.983519	8	TGTAACAATATGTAATTG	AGGGGTAG	-
xylA_right_xylR	PurR	-9	0.91401	86.831	0.983519	9	TGTAACAATATGTAATTG	AGGAAAACGTTTGCGT	-
xylA_right_xylR	Cra	-9	0.921929	87.5832	0.983519	9	TGTAACAATATGTAATTG	ATTGAAACGATTCAGCTA	-
xylA_right_xylR	MetR	0	0.92427	87.8056	0.983519	15	TGTAACAATATGTAATTG	TGAAAAATTTTCATT	+
xylA_right_xylR	NhaR	-2	0.92427	87.8056	0.983519	15	TGTAACAATATGTAATTG	CAGTAAAATCCGAAT	-
xylA_right_xylR	UlaR	7	0.933138	88.6481	0.983519	10	TGTAACAATATGTAATTG	GTCAAAATTAATCAAAA	+
xylA_right_xylR	RcsB	-3	0.939966	89.2968	0.983519	14	TGTAACAATATGTAATTG	ATTAGGATTAATCT	+
xylA_right_xylR	GlpR	-13	0.944643	89.7411	0.983519	5	TGTAACAATATGTAATTG	AAATGATCAATAACGAACAT	+
xylA_right_xylR	FadR	-13	0.959273	91.1309	0.983519	5	TGTAACAATATGTAATTG	AGCTGGTCTGACCTGT	+
xylA_right_xylR	MqsAMqsR	2	0.963983	91.5784	0.983519	17	TGTAACAATATGTAATTG	ACAACCTAAAAGGATAGTT	-
xylA_right_xylR	relBE	3	0.967589	91.9209	0.983519	18	TGTAACAATATGTAATTG	GTGTCTTGACATGTGTCTTTACA	-
xylA_right_xylR	NrdR	-5	0.976901	92.8056	0.983519	13	TGTAACAATATGTAATTG	CACAATATATAGGATTT	+
xylA_right_xylR	RhaS	-15	0.976901	92.8056	0.983519	3	TGTAACAATATGTAATTG	TTGAAATTTCGCCGGTA	+
xylA_right_xylR	MntR	2	0.981203	93.2143	0.983519	18	TGTAACAATATGTAATTG	AATATAGCAAAAGCTATGTTT	+
xylA_right_xylR	FhlA	-10	0.993245	94.3583	0.983519	8	TGTAACAATATGTAATTG	TGTCCGTTTCGACG	-
xylA_right_xylR	RcsAB	-14	0.993798	94.4108	0.983519	4	TGTAACAATATGTAATTG	ATTTAGGATAATCCT	-
xylA_right_xylR	CaiF	-13	0.995754	94.5967	0.983519	5	TGTAACAATATGTAATTG	ACTTTCAATATTGGT	-
xylA_right_xylR	NtrC	-16	0.99686	94.7017	0.983519	2	TGTAACAATATGTAATTG	TGCACCATTTTGGTGCA	-
xylA_right_xylR	BaeR	10	0.998652	94.8719	0.983519	7	TGTAACAATATGTAATTG	GAGCCAATTATGGAGAA	-
xylA_right_xylR	NanR	-14	0.999495	94.952	0.983519	4	TGTAACAATATGTAATTG	ACAGG	+
xylA_right_xylR	MelR	-13	0.99982	94.9829	0.983519	5	TGTAACAATATGTAATTG	CATTCCCTGAAACTCAGA	+
xylA_right_xylR	HipB	-15	0.999958	94.996	0.983519	3	TGTAACAATATGTAATTG	TTATCCGCTCTAGGGGATA	-
xylA_right_xylR	MalT	-13	1	95	0.983519	5	TGTAACAATATGTAATTG	CGGGGATGAG	+
xylF_left_xylR	xylR	-1	0.000103007	0.00978569	0.0195662	14	AAAGAAATATCGTGACTCG	ACCAAATTTCGTAA	+
xylF_left_xylR	XylR	-3	0.0133506	1.26831	0.866197	16	AAAGAAATATCGTGACTCG	GAAAAATCATAATTGA	+
xylF_left_xylR	NagC	-2	0.0182406	1.73285	0.866197	17	AAAGAAATATCGTGACTCG	ACTTATTTCGCATCGTGAAATA	+
xylF_left_xylR	CRP	-5	0.0324658	3.08425	0.999736	14	AAAGAAATATCGTGACTCG	AAAAATGTGATCTAGATCACAT	-
xylF_left_xylR	CytR	-1	0.0395655	3.75873	0.999736	18	AAAGAAATATCGTGACTCG	AATAGATTGCATAAATAT	-
xylF_left_xylR	MetR	1	0.0418288	3.97374	0.999736	14	AAAGAAATATCGTGACTCG	TGAAAAATTTTCATT	+
xylF_left_xylR	OmpR	-2	0.051608	4.90276	0.999736	17	AAAGAAATATCGTGACTCG	TTATATTTGGTTACATATA	-
xylF_left_xylR	ArcA	-3	0.0572974	5.44325	0.999736	15	AAAGAAATATCGTGACTCG	AACATATTATTAACA	+
xylF_left_xylR	RstA	3	0.0677356	6.43488	0.999736	11	AAAGAAATATCGTGACTCG	TGTAACTAAATGTA	-
xylF_left_xylR	rpoD18	5	0.077548	7.36706	0.999736	19	AAAGAAATATCGTGACTCG	TTGACAAAGTTATTATTTAACAGGTATAAT	+
xylF_left_xylR	ArgP	-5	0.0909376	8.63907	0.999736	14	AAAGAAATATCGTGACTCG	CTTATTGTCTCTTATTGC	+
xylF_left_xylR	GadX	0	0.0957858	9.09965	0.999736	19	AAAGAAATATCGTGACTCG	ATATAAAAATCAGACATTT	-
xylF_left_xylR	rpoD19	5	0.0985029	9.35778	0.999736	19	AAAGAAATATCGTGACTCG	ATTATACCTCAAAACGGATAAAAAGTGTCAA	-
xylF_left_xylR	RcsAB	-2	0.143778	13.6589	0.999736	15	AAAGAAATATCGTGACTCG	AGAATTATCCTAAAA	+
xylF_left_xylR	OxyR	-2	0.153288	14.5624	0.999736	17	AAAGAAATATCGTGACTCG	AGTGATAGGTATAATCT	-
xylF_left_xylR	GntR	-8	0.155334	14.7567	0.999736	11	AAAGAAATATCGTGACTCG	GATGTTACCCGTAACAGA	+
xylF_left_xylR	HNS	-4	0.164549	15.6322	0.999736	13	AAAGAAATATCGTGACTCG	TAATAAAATGAAA	+
xylF_left_xylR	relBE	3	0.165301	15.7036	0.999736	19	AAAGAAATATCGTGACTCG	TGTAAAGACACATGTCAAGACAC	+
xylF_left_xylR	rpoD15	4	0.171125	16.2569	0.999736	19	AAAGAAATATCGTGACTCG	ATTATACCCTATTCAAAGGGGTGTCAA	-
xylF_left_xylR	Ada	0	0.172254	16.3642	0.999736	13	AAAGAAATATCGTGACTCG	AAGCAAAGAGCAA	+
xylF_left_xylR	RcsB	-2	0.185156	17.5898	0.999736	14	AAAGAAATATCGTGACTCG	AGATTAGTCCTAAT	-
xylF_left_xylR	PdhR	-6	0.19364	18.3958	0.999736	13	AAAGAAATATCGTGACTCG	AATTGGTAAGACCAAT	+
xylF_left_xylR	rpoD16	5	0.196668	18.6834	0.999736	19	AAAGAAATATCGTGACTCG	ATTATACAGAAAAAATAAAAAATGTCAA	-
xylF_left_xylR	NrdR	0	0.197393	18.7523	0.999736	17	AAAGAAATATCGTGACTCG	CACAATATATAGGATTT	+
xylF_left_xylR	MarA	1	0.20706	19.6707	0.999736	18	AAAGAAATATCGTGACTCG	ACGGCACAAATTGTTAAAT	-
xylF_left_xylR	rpoD17	5	0.207575	19.7196	0.999736	19	AAAGAAATATCGTGACTCG	ATTATAACAAAAACTAAATAATTTGTCAA	-
xylF_left_xylR	LexA	6	0.221062	21.0009	0.999736	14	AAAGAAATATCGTGACTCG	AACTGTATAAAAAAACAGTA	+
xylF_left_xylR	ModE	12	0.235085	22.3331	0.999736	12	AAAGAAATATCGTGACTCG	CGCTATATAATTTTGTATATATCG	-
xylF_left_xylR	Fur	4	0.242763	23.0625	0.999736	14	AAAGAAATATCGTGACTCG	ATGATAATCATTATCATT	-
xylF_left_xylR	LeuO	1	0.271936	25.8339	0.999736	17	AAAGAAATATCGTGACTCG	ATAACAATTACCACGAAT	-
xylF_left_xylR	DgsA	-2	0.273712	26.0026	0.999736	17	AAAGAAATATCGTGACTCG	ATTAATTTCGAGCTGTAAAATAA	-
xylF_left_xylR	ExuR	9	0.291404	27.6833	0.999736	8	AAAGAAATATCGTGACTCG	AAAGTGGTATAACAAAT	+
xylF_left_xylR	SoxS	-6	0.325715	30.9429	0.999736	13	AAAGAAATATCGTGACTCG	ATGGCACAAATTGTTAAA	-
xylF_left_xylR	MetJ	-5	0.328885	31.2441	0.999736	7	AAAGAAATATCGTGACTCG	GACATCT	-
xylF_left_xylR	IscR	6	0.337252	32.0389	0.999736	16	AAAGAAATATCGTGACTCG	TATACCCTGCTAATTTAGTCAA	+
xylF_left_xylR	GlpR	3	0.365655	34.7372	0.999736	17	AAAGAAATATCGTGACTCG	AAATGATCAATAACGAACAT	+
xylF_left_xylR	IHF	-2	0.388436	36.9014	0.999736	13	AAAGAAATATCGTGACTCG	AATCAATTAATTA	-
xylF_left_xylR	Fis	-2	0.388574	36.9145	0.999736	15	AAAGAAATATCGTGACTCG	GCTTATTTTTTAAGC	+
xylF_left_xylR	Nac	-6	0.388574	36.9145	0.999736	13	AAAGAAATATCGTGACTCG	AATTTATTATGTGAT	+
xylF_left_xylR	ArgR	2	0.411178	39.0619	0.999736	16	AAAGAAATATCGTGACTCG	TAAATGAATTTTTATGCA	+
xylF_left_xylR	PhoP	-1	0.424306	40.3091	0.999736	17	AAAGAAATATCGTGACTCG	TAAACAAATGATAAACA	-
xylF_left_xylR	FhlA	-7	0.431818	41.0227	0.999736	12	AAAGAAATATCGTGACTCG	CGTCGAAACTGCCA	+
xylF_left_xylR	Rob	-6	0.437716	41.583	0.999736	13	AAAGAAATATCGTGACTCG	ATGGCACGTATTGTTAA	+
xylF_left_xylR	NsrR	0	0.440751	41.8714	0.999736	11	AAAGAAATATCGTGACTCG	AAATGCATCTT	-
xylF_left_xylR	GadW	7	0.495525	47.0748	0.999736	13	AAAGAAATATCGTGACTCG	CATTATAATATTAAAATCAG	-
xylF_left_xylR	CpxR	2	0.499923	47.4927	0.999736	13	AAAGAAATATCGTGACTCG	GTAAAAATATGTAAA	+
xylF_left_xylR	RelBRelE	-4	0.500036	47.5034	0.999736	12	AAAGAAATATCGTGACTCG	AAAACTTGTAAT	-
xylF_left_xylR	CysB	11	0.515866	49.0073	0.999736	19	AAAGAAATATCGTGACTCG	TTATTATTCCATTTTATTTTTCATTATCCCTTTTTGG	+
xylF_left_xylR	AraC	1	0.558661	53.0728	0.999736	18	AAAGAAATATCGTGACTCG	AACAGCAAGATAGTCCATA	-
xylF_left_xylR	Lrp	3	0.56342	53.5249	0.999736	9	AAAGAAATATCGTGACTCG	CAGCATAAAATT	-
xylF_left_xylR	PhoB	3	0.563776	53.5587	0.999736	13	AAAGAAATATCGTGACTCG	CTGTCATAAAACTGTC	+
xylF_left_xylR	SlyA	6	0.586413	55.7092	0.999736	5	AAAGAAATATCGTGACTCG	ATATTTAAAGA	+
xylF_left_xylR	MalT	-8	0.588334	55.8918	0.999736	10	AAAGAAATATCGTGACTCG	CTCATCCCCC	-
xylF_left_xylR	UlaR	2	0.593932	56.4235	0.999736	15	AAAGAAATATCGTGACTCG	GTCAAAATTAATCAAAA	+
xylF_left_xylR	CsgD	-12	0.602971	57.2822	0.999736	7	AAAGAAATATCGTGACTCG	TAACTCACTCG	-
xylF_left_xylR	IclR	0	0.610954	58.0406	0.999736	7	AAAGAAATATCGTGACTCG	ATGAAAA	-
xylF_left_xylR	AgaR	1	0.61573	58.4943	0.999736	18	AAAGAAATATCGTGACTCG	AAAAGAAATAAAACGAAAG	-
xylF_left_xylR	UxuR	8	0.618819	58.7878	0.999736	7	AAAGAAATATCGTGACTCG	AATTGGTTAACCACA	-
xylF_left_xylR	CaiF	-2	0.633713	60.2027	0.999736	15	AAAGAAATATCGTGACTCG	AACAATATTGAAAAT	+
xylF_left_xylR	FNR	1	0.64093	60.8884	0.999736	13	AAAGAAATATCGTGACTCG	TTGATTTATATCAA	+
xylF_left_xylR	AsnC	7	0.659127	62.6171	0.999736	5	AAAGAAATATCGTGACTCG	AATCAACAAAAA	-
xylF_left_xylR	marA	2	0.666208	63.2898	0.999736	15	AAAGAAATATCGTGACTCG	TTTAGCAAAAAGTGCCA	+
xylF_left_xylR	RhaS	-4	0.666208	63.2898	0.999736	15	AAAGAAATATCGTGACTCG	AAACGTCGAAATTTCAA	-
xylF_left_xylR	DnaA	-4	0.668587	63.5157	0.999736	11	AAAGAAATATCGTGACTCG	ATTTATCCACA	+
xylF_left_xylR	FlhDC	5	0.736608	69.9778	0.999736	11	AAAGAAATATCGTGACTCG	AAACGCCCGAAAAAGC	-
xylF_left_xylR	NhaR	0	0.748349	71.0931	0.999736	15	AAAGAAATATCGTGACTCG	CAGTAAAATCCGAAT	-
xylF_left_xylR	NarL	-7	0.755147	71.7389	0.999736	8	AAAGAAATATCGTGACTCG	AATGGGTA	+
xylF_left_xylR	Dan	-4	0.764769	72.653	0.999736	7	AAAGAAATATCGTGACTCG	AATTAAC	-
xylF_left_xylR	Cra	-1	0.771266	73.2703	0.999736	18	AAAGAAATATCGTGACTCG	GAGCTGAATCGTTTCAGT	+
xylF_left_xylR	MqsAMqsR	-4	0.778147	73.924	0.999736	15	AAAGAAATATCGTGACTCG	AACTAACCTTTTAGGTGGT	+
xylF_left_xylR	GadE	10	0.79585	75.6057	0.999736	8	AAAGAAATATCGTGACTCG	TGTAAATAATAAAAACCT	+
xylF_left_xylR	MqsA	0	0.796394	75.6574	0.999736	14	AAAGAAATATCGTGACTCG	AATCACCTAAAAGG	-
xylF_left_xylR	TyrR	2	0.811238	77.0676	0.999736	15	AAAGAAATATCGTGACTCG	GTAAATTTATCTTTACA	+
xylF_left_xylR	NtrC	-2	0.855138	81.2381	0.999736	17	AAAGAAATATCGTGACTCG	TGCACCATTTTGGTGCA	-
xylF_left_xylR	FadR	-4	0.857135	81.4278	0.999736	15	AAAGAAATATCGTGACTCG	AGTGGTCAGACCAGCT	-
xylF_left_xylR	GalR	2	0.857135	81.4278	0.999736	14	AAAGAAATATCGTGACTCG	GTAACCGATTCCACTG	+
xylF_left_xylR	MntR	-2	0.861946	81.8848	0.999736	17	AAAGAAATATCGTGACTCG	AAACATAGCCTTTGCTATATT	-
xylF_left_xylR	DcuR	10	0.865164	82.1906	0.999736	7	AAAGAAATATCGTGACTCG	TTAAAAAATTAAAATAA	-
xylF_left_xylR	HipB	-6	0.866388	82.3069	0.999736	13	AAAGAAATATCGTGACTCG	TTATCCGCTCTAGGGGATA	-
xylF_left_xylR	MlrA	-5	0.90716	86.1802	0.999736	14	AAAGAAATATCGTGACTCG	AAAATTGTACAGAAAAAAGTAAATGTACAA	+
xylF_left_xylR	marR	-11	0.911191	86.5631	0.999736	8	AAAGAAATATCGTGACTCG	TTGCCCAGGCAACT	-
xylF_left_xylR	GcvA	13	0.932131	88.5524	0.999736	11	AAAGAAATATCGTGACTCG	AATAATCAAATGAAAAAAACTAAT	+
xylF_left_xylR	DeoR	-7	0.937763	89.0875	0.999736	11	AAAGAAATATCGTGACTCG	TGCTGTGAGAA	-
xylF_left_xylR	TorR	2	0.93777	89.0882	0.999736	7	AAAGAAATATCGTGACTCG	ATGAACAGA	-
xylF_left_xylR	AscG	-8	0.938286	89.1372	0.999736	11	AAAGAAATATCGTGACTCG	TTTGTGAAACAAG	+
xylF_left_xylR	NanR	-10	0.97674	92.7903	0.999736	5	AAAGAAATATCGTGACTCG	CCTGT	-
xylF_left_xylR	PurR	3	0.978144	92.9237	0.999736	13	AAAGAAATATCGTGACTCG	AGGAAAACGTTTGCGT	-
xylF_left_xylR	NarP	-2	0.980002	93.1002	0.999736	8	AAAGAAATATCGTGACTCG	AGGGGTAG	-
xylF_left_xylR	MelR	9	0.980829	93.1788	0.999736	9	AAAGAAATATCGTGACTCG	CATTCCCTGAAACTCAGA	+
xylF_left_xylR	TrpR	-8	0.996043	94.6241	0.999736	11	AAAGAAATATCGTGACTCG	CTAGTTAACTAGTACA	+
xylF_left_xylR	GalS	-10	0.997535	94.7659	0.999736	9	AAAGAAATATCGTGACTCG	TGGAAGCGGTTACAT	-
xylF_left_xylR	BaeR	1	0.998886	94.8941	0.999736	16	AAAGAAATATCGTGACTCG	GAGCCAATTATGGAGAA	-
xylF_left_xylR	EvgA	2	0.999558	94.958	0.999736	15	AAAGAAATATCGTGACTCG	TCTTACAGTTGTAGGAA	-
xylF_left_xylR	PutA	5	0.999749	94.9761	0.999736	5	AAAGAAATATCGTGACTCG	GGTGCAACCT	-
xylF_left_xylR	RutR	-10	0.999972	94.9974	0.999736	9	AAAGAAATATCGTGACTCG	AGTTGACTAATTGGTC	-
xylF_right_xylR	XylR	0	0.000335108	0.0318353	0.0636537	16	GAAACTTCGCTATTGA	GAAAAATCATAATTGA	+
xylF_right_xylR	TyrR	1	0.0222647	2.11515	0.999736	16	GAAACTTCGCTATTGA	GTAAATTTATCTTTACA	+
xylF_right_xylR	GadX	0	0.0247836	2.35444	0.999736	16	GAAACTTCGCTATTGA	TAATGTCTGATTTTTATAT	+
xylF_right_xylR	CysB	1	0.04175	3.96625	0.999736	16	GAAACTTCGCTATTGA	CCATATAGTGATAATGACAAATAAAATGGAATAATAA	-
xylF_right_xylR	GlpR	-2	0.056007	5.32067	0.999736	14	GAAACTTCGCTATTGA	ATGTTCGTTATTGATCATTT	-
xylF_right_xylR	RhaS	-1	0.0817109	7.76253	0.999736	15	GAAACTTCGCTATTGA	AAACGTCGAAATTTCAA	-
xylF_right_xylR	xylR	4	0.0903386	8.58217	0.999736	10	GAAACTTCGCTATTGA	TTACGAAATTTGGT	-
xylF_right_xylR	CpxR	1	0.0930464	8.83941	0.999736	14	GAAACTTCGCTATTGA	GTAAAAATATGTAAA	+
xylF_right_xylR	CRP	0	0.103894	9.86993	0.999736	16	GAAACTTCGCTATTGA	AAAAATGTGATCTAGATCACAT	-
xylF_right_xylR	ArgR	5	0.109392	10.3923	0.999736	13	GAAACTTCGCTATTGA	TGCATAAAAATTCATTTA	-
xylF_right_xylR	IHF	-5	0.116014	11.0213	0.999736	11	GAAACTTCGCTATTGA	TAATTAATTGATT	+
xylF_right_xylR	NhaR	3	0.13963	13.2648	0.999736	12	GAAACTTCGCTATTGA	CAGTAAAATCCGAAT	-
xylF_right_xylR	rpoD19	2	0.140723	13.3687	0.999736	16	GAAACTTCGCTATTGA	TTGACATTTTTTTTGTTTTTTGTGGTATAAT	+
xylF_right_xylR	Fis	5	0.165917	15.7621	0.999736	10	GAAACTTCGCTATTGA	GCTTAAAAAATAAGC	-
xylF_right_xylR	Dan	-11	0.197435	18.7563	0.999736	5	GAAACTTCGCTATTGA	GTTAATT	+
xylF_right_xylR	rpoD16	9	0.211202	20.0642	0.999736	16	GAAACTTCGCTATTGA	ATTATACAGAAAAAATAAAAAATGTCAA	-
xylF_right_xylR	OxyR	0	0.222671	21.1538	0.999736	16	GAAACTTCGCTATTGA	AGATTATACCTATCACT	+
xylF_right_xylR	FNR	-12	0.223377	21.2209	0.999736	4	GAAACTTCGCTATTGA	TTGATATAAATCAA	-
xylF_right_xylR	rpoD15	2	0.223773	21.2584	0.999736	16	GAAACTTCGCTATTGA	TTGACATCCCTTTGAATAGGGTATAAT	+
xylF_right_xylR	FhlA	4	0.242502	23.0377	0.999736	10	GAAACTTCGCTATTGA	CGTCGAAACTGCCA	+
xylF_right_xylR	rpoD17	2	0.248816	23.6375	0.999736	16	GAAACTTCGCTATTGA	TTGACAAATTATTTAGTTTCTGTTATAAT	+
xylF_right_xylR	rpoD18	4	0.251708	23.9123	0.999736	16	GAAACTTCGCTATTGA	TTGACAAAGTTATTATTTAACAGGTATAAT	+
xylF_right_xylR	MqsAMqsR	-2	0.252986	24.0337	0.999736	14	GAAACTTCGCTATTGA	AACTAACCTTTTAGGTGGT	+
xylF_right_xylR	PhoP	1	0.258623	24.5692	0.999736	16	GAAACTTCGCTATTGA	TGTTTATCATTTGTTTA	+
xylF_right_xylR	IscR	9	0.267241	25.3879	0.999736	13	GAAACTTCGCTATTGA	TATACCCTGCTAATTTAGTCAA	+
xylF_right_xylR	Rob	4	0.278116	26.421	0.999736	13	GAAACTTCGCTATTGA	TTAACAATTCGTGCCAT	-
xylF_right_xylR	IclR	2	0.278686	26.4752	0.999736	5	GAAACTTCGCTATTGA	ATGAAAA	-
xylF_right_xylR	FlhDC	-1	0.281073	26.7019	0.999736	15	GAAACTTCGCTATTGA	AAACGCCCGAAAAAGC	-
xylF_right_xylR	HNS	0	0.286142	27.1835	0.999736	13	GAAACTTCGCTATTGA	TAATAAAATGAAA	+
xylF_right_xylR	NsrR	-1	0.296794	28.1955	0.999736	11	GAAACTTCGCTATTGA	AAGATGCATTT	+
xylF_right_xylR	DgsA	1	0.329266	31.2803	0.999736	16	GAAACTTCGCTATTGA	ATTAATTTCGAGCTGTAAAATAA	-
xylF_right_xylR	marA	5	0.331265	31.4702	0.999736	12	GAAACTTCGCTATTGA	TTTAGCAAAAAGTGCCA	+
xylF_right_xylR	CaiF	9	0.335616	31.8835	0.999736	6	GAAACTTCGCTATTGA	AACAATATTGAAAAT	+
xylF_right_xylR	MetR	4	0.35989	34.1895	0.999736	11	GAAACTTCGCTATTGA	TGAAAAATTTTCATT	+
xylF_right_xylR	NagC	2	0.373157	35.4499	0.999736	16	GAAACTTCGCTATTGA	ACTTATTTCGCATCGTGAAATA	+
xylF_right_xylR	Lrp	5	0.393155	37.3497	0.999736	7	GAAACTTCGCTATTGA	CAGCATAAAATT	-
xylF_right_xylR	MelR	8	0.405356	38.5088	0.999736	10	GAAACTTCGCTATTGA	CATTCCCTGAAACTCAGA	+
xylF_right_xylR	GalR	1	0.409365	38.8897	0.999736	15	GAAACTTCGCTATTGA	GTAACCGATTCCACTG	+
xylF_right_xylR	OmpR	1	0.416726	39.589	0.999736	16	GAAACTTCGCTATTGA	TTATATTTGGTTACATATA	-
xylF_right_xylR	ArgP	-1	0.417944	39.7047	0.999736	15	GAAACTTCGCTATTGA	CTTATTGTCTCTTATTGC	+
xylF_right_xylR	GcvA	-3	0.447539	42.5162	0.999736	13	GAAACTTCGCTATTGA	AATAATCAAATGAAAAAAACTAAT	+
xylF_right_xylR	ArcA	-3	0.452396	42.9776	0.999736	13	GAAACTTCGCTATTGA	AACATATTATTAACA	+
xylF_right_xylR	AraC	5	0.455178	43.2419	0.999736	14	GAAACTTCGCTATTGA	TATGGACTATCTTGCTGTT	+
xylF_right_xylR	CytR	2	0.470114	44.6608	0.999736	16	GAAACTTCGCTATTGA	AATAGATTGCATAAATAT	-
xylF_right_xylR	AscG	5	0.476417	45.2596	0.999736	8	GAAACTTCGCTATTGA	TTTGTGAAACAAG	+
xylF_right_xylR	MarA	-3	0.48162	45.7539	0.999736	13	GAAACTTCGCTATTGA	ATTTAACAATTTGTGCCGT	+
xylF_right_xylR	Ada	-6	0.491792	46.7202	0.999736	10	GAAACTTCGCTATTGA	TTGCGCTTTGATT	-
xylF_right_xylR	ModE	-7	0.499816	47.4825	0.999736	9	GAAACTTCGCTATTGA	CGCTATATAATTTTGTATATATCG	-
xylF_right_xylR	TorR	-8	0.517102	49.1247	0.999736	8	GAAACTTCGCTATTGA	TCTGTTCAT	+
xylF_right_xylR	PhoB	6	0.533242	50.658	0.999736	10	GAAACTTCGCTATTGA	CTGTCATAAAACTGTC	+
xylF_right_xylR	Cra	5	0.538555	51.1628	0.999736	13	GAAACTTCGCTATTGA	GAGCTGAATCGTTTCAGT	+
xylF_right_xylR	GadE	9	0.566576	53.8247	0.999736	9	GAAACTTCGCTATTGA	TGTAAATAATAAAAACCT	+
xylF_right_xylR	GadW	11	0.641069	60.9015	0.999736	9	GAAACTTCGCTATTGA	CATTATAATATTAAAATCAG	-
xylF_right_xylR	NrdR	-2	0.651896	61.9301	0.999736	14	GAAACTTCGCTATTGA	AAATGCTATATATAGTG	-
xylF_right_xylR	NtrC	-5	0.666028	63.2726	0.999736	11	GAAACTTCGCTATTGA	TGCACCATTTTGGTGCA	-
xylF_right_xylR	MntR	-1	0.673367	63.9698	0.999736	15	GAAACTTCGCTATTGA	AAACATAGCCTTTGCTATATT	-
xylF_right_xylR	marR	-3	0.708155	67.2747	0.999736	13	GAAACTTCGCTATTGA	AGTTGCCTGGGCAA	+
xylF_right_xylR	SoxS	5	0.732821	69.618	0.999736	13	GAAACTTCGCTATTGA	TTTAGCAATTTGTGCCAT	+
xylF_right_xylR	MlrA	11	0.761629	72.3547	0.999736	16	GAAACTTCGCTATTGA	AAAATTGTACAGAAAAAAGTAAATGTACAA	+
xylF_right_xylR	relBE	-7	0.766907	72.8561	0.999736	9	GAAACTTCGCTATTGA	GTGTCTTGACATGTGTCTTTACA	-
xylF_right_xylR	MalT	-7	0.774069	73.5365	0.999736	9	GAAACTTCGCTATTGA	CGGGGATGAG	+
xylF_right_xylR	CsgD	-1	0.775542	73.6765	0.999736	11	GAAACTTCGCTATTGA	CGAGTGAGTTA	+
xylF_right_xylR	Fur	4	0.783601	74.4421	0.999736	14	GAAACTTCGCTATTGA	ATGATAATCATTATCATT	-
xylF_right_xylR	TrpR	-9	0.798629	75.8697	0.999736	7	GAAACTTCGCTATTGA	CTAGTTAACTAGTACA	+
xylF_right_xylR	SlyA	-9	0.818019	77.7118	0.999736	7	GAAACTTCGCTATTGA	ATATTTAAAGA	+
xylF_right_xylR	UlaR	-10	0.821606	78.0526	0.999736	6	GAAACTTCGCTATTGA	TTTTGATTAAATTTGAA	-
xylF_right_xylR	AsnC	-6	0.828395	78.6975	0.999736	10	GAAACTTCGCTATTGA	TTTTTAATGAAT	+
xylF_right_xylR	RcsB	1	0.841039	79.8987	0.999736	13	GAAACTTCGCTATTGA	AGATTAGTCCTAAT	-
xylF_right_xylR	Nac	-3	0.854847	81.2104	0.999736	13	GAAACTTCGCTATTGA	AATTTATTATGTGAT	+
xylF_right_xylR	RcsAB	-11	0.865308	82.2042	0.999736	5	GAAACTTCGCTATTGA	ATTTAGGATAATCCT	-
xylF_right_xylR	PutA	4	0.880381	83.6362	0.999736	6	GAAACTTCGCTATTGA	GGTGCAACCT	-
xylF_right_xylR	LeuO	4	0.888996	84.4547	0.999736	14	GAAACTTCGCTATTGA	ATAACAATTACCACGAAT	-
xylF_right_xylR	AgaR	14	0.893296	84.8631	0.999736	5	GAAACTTCGCTATTGA	AAAAGAAATAAAACGAAAG	-
xylF_right_xylR	LexA	9	0.896292	85.1478	0.999736	11	GAAACTTCGCTATTGA	AACTGTATAAAAAAACAGTA	+
xylF_right_xylR	DcuR	4	0.900501	85.5476	0.999736	13	GAAACTTCGCTATTGA	TTAAAAAATTAAAATAA	-
xylF_right_xylR	BaeR	-2	0.908552	86.3124	0.999736	14	GAAACTTCGCTATTGA	TTCTCCATAATTGGCGC	+
xylF_right_xylR	MetJ	-13	0.911097	86.5542	0.999736	3	GAAACTTCGCTATTGA	AGATGTC	+
xylF_right_xylR	RelBRelE	-7	0.92152	87.5444	0.999736	9	GAAACTTCGCTATTGA	AAAACTTGTAAT	-
xylF_right_xylR	GalS	3	0.932916	88.6271	0.999736	12	GAAACTTCGCTATTGA	GTGTAACCGCTTCCA	+
xylF_right_xylR	DnaA	-10	0.94679	89.945	0.999736	6	GAAACTTCGCTATTGA	TGTGGATAACT	-
xylF_right_xylR	NarL	-2	0.949852	90.236	0.999736	8	GAAACTTCGCTATTGA	TACCCATT	-
xylF_right_xylR	NarP	-1	0.956218	90.8407	0.999736	8	GAAACTTCGCTATTGA	ATACCCCT	+
xylF_right_xylR	RutR	-10	0.959785	91.1796	0.999736	6	GAAACTTCGCTATTGA	AGTTGACTAATTGGTC	-
xylF_right_xylR	UxuR	-7	0.960814	91.2773	0.999736	9	GAAACTTCGCTATTGA	AGTGGTTAACCAATT	+
xylF_right_xylR	ExuR	-1	0.976949	92.8101	0.999736	15	GAAACTTCGCTATTGA	AAAGTGGTATAACAAAT	+
xylF_right_xylR	PdhR	-2	0.978217	92.9306	0.999736	14	GAAACTTCGCTATTGA	AATTGGTAAGACCAAT	+
xylF_right_xylR	DeoR	8	0.982138	93.3031	0.999736	3	GAAACTTCGCTATTGA	TGCTGTGAGAA	-
xylF_right_xylR	GntR	10	0.989122	93.9666	0.999736	8	GAAACTTCGCTATTGA	TCTGTTACGGGTAACATT	-
xylF_right_xylR	RstA	6	0.995273	94.5509	0.999736	8	GAAACTTCGCTATTGA	TGTAACTAAATGTA	-
xylF_right_xylR	HipB	-3	0.995309	94.5544	0.999736	13	GAAACTTCGCTATTGA	TATCCCCTAGAGCGGATAA	+
xylF_right_xylR	PurR	3	0.99784	94.7948	0.999736	13	GAAACTTCGCTATTGA	ACGCAAACGTTTTCCT	+
xylF_right_xylR	NanR	-15	0.998769	94.883	0.999736	1	GAAACTTCGCTATTGA	ACAGG	+
xylF_right_xylR	EvgA	14	0.999314	94.9348	0.999736	3	GAAACTTCGCTATTGA	TCTTACAGTTGTAGGAA	-
xylF_right_xylR	FadR	-2	0.999421	94.945	0.999736	14	GAAACTTCGCTATTGA	AGCTGGTCTGACCTGT	+
xylF_right_xylR	MqsA	-1	0.99967	94.9686	0.999736	14	GAAACTTCGCTATTGA	AATCACCTAAAAGG	-
