# Supplementary material for: Deciphering the regulatory genome of Escherichia coli, one hundred promoters at a time
Source: eLife. 2020 Sep 21;9:e55308. doi: 10.7554/eLife.55308 (PMC7567609; doi:10.7554/eLife.55308)
Supplement: Appendix 4—figure 2—source data 1. — The source data file contains the percentage composition of each regulatory architecture displayed in the Figure. This includes architectures more complicated than those displayed in the histogram. [file elife-55308-app4-fig2-data1.csv]

The overall percentages that each architecture comprises of the Reg-Seq dataset or RegulonDB
RegSeq
architecture (num activator num repressor)	percentage of total RegSeq promoters (excluding promoters with no RNAP found)
(0 0)	0.414634146
(0 1)	0.256098
(1 0)	0.121951
(1 1)	0.036585
(0 2)	0.04878
(2 0)	0.02439
(1 2)	0.036585
(2 1)	0.02439
(2 2)	0.012195
(3 0)	0.012195
(0 3)	0.012195
(0 4)	0
RegulonDB
(0 0)	3.85E-03
(0 1)	2.60E-01
(1 0)	2.54E-01
(1 1)	1.02E-01
(0 2)	6.94E-02
(2 0)	4.05E-02
(1 2)	5.59E-02
(2 1)	5.39E-02
(2 2)	1.16E-02
(3 0)	5.78E-03
(0 3)	2.70E-02
(0 4)	0.00E+00
Percentages do not sum to zero as more complicated architectures are not included in figure.
