# Supplementary material for: Deciphering the regulatory genome of Escherichia coli, one hundred promoters at a time
Source: eLife. 2020 Sep 21;9:e55308. doi: 10.7554/eLife.55308 (PMC7567609; doi:10.7554/eLife.55308)
Supplement: Figure 1—source data 1. — In Figure 1 the locations of all promoters studied in Reg-Seq are displayed along the E. coli genome. The source data contains the exact position of the '0' position of each mutagenized promoter region. [file elife-55308-fig1-data1.csv]

#Genome locations of the presumed TSS in the Reg-Seq experiment
name	start_site
fdoH	4085867
sdaB	2928035
thiM	2185451
yedJ	2033449
ykgE	321511
sdiA	1996867
yqhC	3155262
yicI	3836664
ybjT	909320
mtgA	3350504
aphA	4269355
bdcR	4474096
yncD	1523276
rumB	897947
yagH	285350
eco	2303851
yfhG	2690181
htrB	1116709
iap	2876547
ygjP	3235915
yedK	2009866
holC	4484273
aegA	2585570
rapA	63358
dusC	2230395
fdhE	4081359
dnaE	197026
ycgB	1237285
yehS	2212241
yeiQ	2266214
ydhO	1734357
hslU	4122354
ymgG	1223097
rlmA	1907086
modE	794644
ycbZ	1018330
yajL	443748
yecE	1950778
ybiP	904523
ybjL	889945
ygdH	2926272
pcm	2870686
rcsF	220022
sbcB	2082728
ygeR	2999918
mscK	486492
mscS	3069871
ynaI	1395973
ybdG	604684
hicB	1509221
arcB	3353049
minC	1226139
ybeZ	693469
ydjA	1848700
yggW	3096620
acuI	3403446
yehU	2214673
yehT	2212969
ybiO	845736
mscL	3438001
zapB	4118427
WaaA-coaD	3808516
coaA	4175107
yjjJ	4621716
groSL	4370616
pyrLBI	4472553
rplKAJL-rpoBC	4178354
yodB	2042294
atpIBEFHAGDC	3922525
msyB	1114213
ndk	2644913
thrLABC	148
tig	455077
tff-rpsB-tsf	189712
maoP	3948058
poxB	911076
rspA	1655186
mscM	4390638
arcA	4640508
tar	1972716
dpiBA	652172
araAB	70075
araC	70241
xylF	3731069
xylA	3730807
dicA	1647979
dicC	1647876
dicB	1649597
ompR	3536707
xapAB	2524910
ilvC	3957912
asnA	3927129
idnK	4494597
dinJ	246533
yjiY	4591397
motAB-cheAW	1977302
ftsK	933138
cra	87969
uvrD	3997907
adiY	4338042
znuCB	1942634
znuA	1942661
zupT	3182433
pitA	3637612
ecnB	4376509
leuABCD	83735
