# Supplementary material for: Deciphering the regulatory genome of Escherichia coli, one hundred promoters at a time
Source: eLife. 2020 Sep 21;9:e55308. doi: 10.7554/eLife.55308 (PMC7567609; doi:10.7554/eLife.55308)
Supplement: Figure 2—source data 1. [file elife-55308-fig2-data1.xlsx]

## Sheet: Sheet1
#Energy matrix displayed in Figure 2.
pos	val_A	val_C	val_G	val_T
80	0.021619	-0.048642	0.022599	0.004425
81	0.037733	-0.03936	-0.063054	0.06468
82	-0.016837	-0.016928	-0.059376	0.093142
83	-0.042512	0.011187	-0.039261	0.070587
84	0.008487	-0.035853	0.048144	-0.020778
85	-0.102469	-0.005318	-0.015999	0.123786
86	-0.014368	0.067522	-0.016299	-0.036855
87	0.029126	0.015873	-0.025139	-0.01986
88	-0.076313	0.03455	-0.01032	0.052082
89	0.135809	-0.016582	-0.069668	-0.049558
90	-0.061136	0.086246	-0.020538	-0.004572
91	0.06043	-0.020608	-0.018669	-0.021154
92	0.084647	-0.083916	0.001152	-0.001884
93	0.049111	-0.051813	-0.0028	0.005502
94	0.018523	-0.044459	0.002611	0.023325
#Information footprint displayed in figure 2.
pos	info
0	-9.64351e-06
1	-1.91967e-06
2	-7.01154e-05
3	-2.28377e-05
4	-1.86923e-05
5	-1.13352e-06
6	-3.37445e-05
7	-9.24409e-05
8	-0.000628692
9	-1.79655e-05
10	3.21031e-05
11	-1.01795e-05
12	4.25837e-05
13	-0.000214874
14	-0.000108425
15	-0.000121666
16	-9.95061e-06
17	-0.000149705
18	-0.00016903
19	-0.00011143
20	-7.79946e-05
21	-0.000730181
22	0.000205736
23	-0.000345393
24	-3.05609e-05
25	-0.000269917
26	-0.000129433
27	-5.50316e-07
28	-5.55737e-05
29	-0.000270927
30	-1.17983e-08
31	-3.06113e-05
32	-8.28143e-05
33	-3.69296e-05
34	-4.6571e-05
35	-9.21937e-05
36	-0.000143497
37	7.4079e-07
38	-3.63311e-06
39	-6.33772e-05
40	-0.000116882
41	-0.00022579
42	-1.06641e-07
43	-0.000716508
44	-4.34885e-05
45	4.82529e-06
46	3.53038e-06
47	-3.48826e-05
48	-1.40004e-05
49	-0.000885476
50	-0.00102232
51	-0.00250272
52	-0.00144887
53	-0.00206626
54	-0.000160329
55	-0.000555264
56	-9.75384e-05
57	-5.09214e-05
58	-7.4628e-05
59	1.85517e-06
60	-0.00036033
61	2.21686e-06
62	1.78387e-05
63	1.00412e-05
64	5.59798e-07
65	-4.10901e-07
66	-9.91114e-05
67	-0.00175301
68	2.58919e-07
69	3.36375e-06
70	0.000282465
71	0.000145986
72	-0.00011472
73	-0.000292669
74	-0.00515834
75	-0.000365649
76	-7.5587e-05
77	-0.00098399
78	-0.00179759
79	8.43708e-05
80	0.000109646
81	0.00101685
82	0.00214752
83	0.00120927
84	0.000575759
85	0.00377011
86	0.00113721
87	0.000201522
88	0.000628948
89	0.00463586
90	0.00186253
91	0.000891906
92	0.00175302
93	0.000584778
94	0.000130121
95	-3.78992e-05
96	8.01579e-05
97	3.96387e-05
98	3.59074e-05
99	-0.000300613
100	-3.00232e-06
101	-0.000142515
102	-8.3058e-06
103	-1.29805e-06
104	-0.000302789
105	-4.77765e-05
106	-5.88815e-05
107	-2.03206e-05
108	-7.25662e-05
109	-0.000382215
110	-3.16471e-05
111	-6.98103e-05
112	-0.000645345
113	1.14672e-06
114	-4.86812e-07
115	-2.7747e-05
116	-2.00913e-06
117	9.80236e-05
118	0.000225983
119	0.000412248
120	8.38093e-05
121	3.91039e-06
122	-7.03163e-05
123	-9.55727e-05
124	2.46724e-05
125	0.000338841
126	2.12755e-06
127	1.34482e-05
128	-0.000135936
129	-1.31308e-06
130	9.20714e-05
131	1.9328e-05
132	9.46339e-05
133	0.000449483
134	4.85024e-05
135	-1.57207e-05
136	-0.000206713
137	-9.25962e-05
138	4.95266e-07
139	-3.77708e-06
140	-0.000131786
141	-0.000140874
142	-0.000249482
143	5.57378e-05
144	8.78734e-05
145	-0.000436862
146	-1.54675e-06
147	-0.000226271
148	-0.000208788
149	-0.000132062
150	-8.18083e-05
151	-9.00023e-05
152	-2.28745e-06
153	5.52703e-06
154	2.6587e-05
155	-0.000117282
156	-8.8353e-06
157	-9.63873e-07
158	-7.31935e-08
159	-0.000279097
