# Supplementary material for: Deciphering the regulatory genome of Escherichia coli, one hundred promoters at a time
Source: eLife. 2020 Sep 21;9:e55308. doi: 10.7554/eLife.55308 (PMC7567609; doi:10.7554/eLife.55308)
Supplement: Figure 3—source data 1. [file elife-55308-fig3-data1.xlsx]

## Sheet: PWMs
#PWM for Figure 3
Lac CRP Reg-Seq
A	C	G	T
0.504806	0.078947	0.1319	0.284347
0.801113	0.019064	0.017067	0.162757
0.540205	0.061909	0.082222	0.315664
0.023608	0.035641	0.029295	0.911456
0.029042	0.018993	0.916341	0.035624
0.058038	0.028944	0.021243	0.891776
0.014892	0.005641	0.968495	0.010973
0.980757	0.008566	0.006079	0.004599
0.092941	0.269973	0.062355	0.574731
0.19886	0.612963	0.094421	0.093756
0.116639	0.249775	0.101927	0.53166
0.490696	0.101718	0.272019	0.135567
0.165941	0.141799	0.444636	0.247624
0.593846	0.040688	0.139769	0.225697
0.020526	0.05556	0.029204	0.89471
0.014166	0.970735	0.007015	0.008084
0.915628	0.01802	0.019861	0.046491
0.037105	0.940544	0.00868	0.013671
0.932371	0.017666	0.048236	0.001727
0.476724	0.017242	0.288361	0.217673
0.174368	0.028249	0.009621	0.787762
0.146479	0.083767	0.050718	0.719036
lac CRP Sort-Seq
A	C	G	T
0.542501	0.060927	0.08113	0.315443
0.022891	0.034679	0.028453	0.913978
0.028216	0.018376	0.918733	0.034675
0.056771	0.028124	0.020582	0.894523
0.014353	0.005386	0.969715	0.010546
0.981609	0.008205	0.005804	0.004381
0.091834	0.269309	0.061368	0.577488
0.197894	0.616155	0.093294	0.092657
0.115598	0.249215	0.100863	0.534324
0.492983	0.100693	0.271727	0.134597
0.165183	0.140906	0.446507	0.247403
0.596766	0.03988	0.138558	0.224796
0.019885	0.054306	0.028377	0.897432
0.013645	0.971895	0.006712	0.007747
0.918011	0.01742	0.019217	0.045351
0.036099	0.942392	0.00833	0.013179
0.934283	0.017063	0.047021	0.001633
0.4784	0.016777	0.287954	0.216869
0.172595	0.027489	0.00927	0.790646
0.14508	0.082517	0.049731	0.722672
0.02359	0.068167	0.027845	0.880399
0.0122	0.114172	0.176664	0.696964
0.273577	0.156609	0.134655	0.435159
MarR Reg-Seq
A	C	G	T
0.722302	0.058491	0.200623	0.018585
0.575903	0.110917	0.0388	0.27438
0.314315	0.560911	0.009424	0.11535
0.507004	0.077265	0.125812	0.289918
0.339515	0.022973	0.148817	0.488695
0.0019	0.010848	0.004117	0.983136
0.016936	0.017802	0.953825	0.011437
0.000259	0.997118	0.002551	7.2e-05
0.031003	0.788375	0.002863	0.177758
0.267319	0.126612	0.308187	0.297881
0.150349	0.183788	0.643815	0.022048
0.037381	0.292958	0.639284	0.030377
0.12403	0.247291	0.50847	0.120209
0.025858	0.937844	0.002949	0.03335
0.983237	0.002482	0.001354	0.012927
0.939687	0.023177	0.008278	0.028858
MarR Sort-Seq
A	C	G	T
0.948025	0.011597	0.02799	0.012388
0.328099	0.120865	0.353073	0.197964
0.005038	0.001688	0.001119	0.992156
0.001304	0.00012	0.000349	0.998226
0.05393	0.012942	0.893227	0.0399
0.009505	0.977791	0.004384	0.008321
0.037796	0.936497	0.018973	0.006733
0.235006	0.211746	0.177511	0.375737
0.266042	0.203271	0.348113	0.182574
0.175804	0.113901	0.64776	0.062535
0.171092	0.196895	0.357307	0.274706
0.238617	0.534686	0.12505	0.101647
0.847964	0.071799	0.035978	0.044259
0.91475	0.030916	0.020523	0.033811
relBE Reg-Seq
A	C	G	T
0.058071	0.057826	0.00664	0.877463
0.063975	0.021249	0.868381	0.046395
0.08521	0.138662	0.120107	0.656021
0.883112	0.040698	0.063576	0.012614
0.567739	0.294768	0.07192	0.065573
0.067122	0.025389	0.058284	0.849205
0.007349	0.101491	0.844178	0.046982
0.860804	0.076263	0.026006	0.036926
0.044526	0.890602	0.025752	0.039119
0.779543	0.057197	0.137455	0.025804
0.087882	0.200346	0.076344	0.635428
0.099478	0.096095	0.053103	0.751323
0.096538	0.114613	0.091577	0.697272
0.025386	0.023204	0.914037	0.037373
0.049084	0.088233	0.069514	0.79317
0.794593	0.052362	0.102127	0.050918
0.904786	0.022357	0.038796	0.034061
0.09701	0.076618	0.080297	0.746075
0.044025	0.149757	0.075309	0.730909
0.920291	0.045226	0.004168	0.030315
0.036282	0.913798	0.009951	0.03997
0.610989	0.123103	0.075724	0.190184
0.501197	0.287328	0.069515	0.141959
relBE Sort-Seq
A	C	G	T
0.083653	0.330037	0.083738	0.502573
0.003946	0.002279	0.989371	0.004404
0.006473	0.041782	0.007901	0.943844
0.925673	0.013826	0.05417	0.006331
0.805227	0.143785	0.009502	0.041486
0.470871	0.141314	0.017022	0.370792
0.018911	0.048527	0.76568	0.166882
0.918712	0.029699	0.013563	0.038026
0.006545	0.974791	0.014965	0.003699
0.527783	0.051375	0.40314	0.017702
0.173772	0.383291	0.135794	0.307142
0.372265	0.168374	0.110918	0.348443
0.040045	0.183271	0.030658	0.746026
0.002448	0.000956	0.99333	0.003266
0.008087	0.207226	0.002844	0.781844
0.027301	0.96153	0.009962	0.001207
0.379298	0.224035	0.179677	0.21699
0.431525	0.057886	0.33682	0.17377
0.000258	0.058322	0.512767	0.428653
0.989372	0.004218	0.001956	0.004453
0.00593	0.973071	0.00077	0.020229
0.453505	0.130072	0.279051	0.137372
0.258499	0.336495	0.14892	0.256085

## Sheet: Information_Footprint
pos	info_marR_Reg-Seq	info_marR_SortSeq	info_relBE_RegSeq	info_relBE_SortSeq	info_lac_SortSeq	info_dgoR_SortSeq	info_dgoR_RegSeq	info_dgoR_500cAMP
0	6.11606e-05	6.11606e-05	-1.62449e-06	2e-06	1.28749e-05	0.00114	1.07492e-05	-1.67778e-07
1	-1.53524e-07	-1.53524e-07	-4.14048e-06	4e-06	-0.000209808	0.001125	5.8601e-05	-8.94641e-07
2	0.000187776	0.000187776	7.036e-05	-7e-05	-6.16584e-05	0.001125	-0.000172322	1.4833e-06
3	-5.4856e-05	-5.4856e-05	5.02635e-08	0	-0.000301927	0.000256	1.07473e-07	3.1626e-07
4	-0.000334157	-0.000334157	-2.70823e-06	3e-06	-0.000429077	0.000229	0.000127564	1.04035e-08
5	6.91123e-05	6.91123e-05	-3.44375e-05	3.4e-05	-2.86094e-05	0.000249	-3.42549e-05	-4.15051e-06
6	-1.05744e-06	-1.05744e-06	1.25776e-06	-1e-06	-0.00181132	0.000149	1.75786e-06	-5.21625e-07
7	5.63443e-05	5.63443e-05	-1.60521e-06	2e-06	0.00334814	0.000186	0.000187271	-6.737e-06
8	1.85729e-05	1.85729e-05	-2.50681e-06	3e-06	0.00151859	5.1e-05	0.000684587	-1.70132e-05
9	-3.41704e-05	-3.41704e-05	-7.69269e-07	1e-06	0.00415638	-0.000116	0.000554362	-9.16407e-06
10	0.000294936	0.000294936	1.86079e-05	-1.9e-05	0.00182634	-0.000463	0.000547284	-4.5386e-05
11	2.29966e-05	2.29966e-05	-1.16731e-05	1.2e-05	-4.54658e-05	-0.000518	0.000186091	-7.04198e-05
12	2.93915e-05	2.93915e-05	1.11296e-05	-1.1e-05	-0.000146253	-0.0006	0.000891808	-4.3415e-05
13	3.14713e-05	3.14713e-05	-3.12233e-06	3e-06	-0.000164898	-0.000545	0.000764522	-0.000106226
14	-3.02231e-05	-3.02231e-05	1.14896e-05	-1.1e-05	0.000137032	-0.000235	0.000528513	-8.5939e-05
15	0.000566312	0.000566312	-1.18551e-05	1.2e-05	-0.00022198	-0.000738	0.000374581	-2.74316e-05
16	0.000193708	0.000193708	-2.34249e-05	2.3e-05	-5.91571e-05	-0.000915	0.000128189	-5.19786e-06
17	-8.13993e-06	-8.13993e-06	2.09099e-05	-2.1e-05	-0.00234436	-0.000879	3.84539e-07	-1.84183e-06
18	0.000371118	0.000371118	8.7635e-06	-9e-06	-0.00375645	-0.000298	3.50014e-06	2.89701e-07
19	-9.10901e-06	-9.10901e-06	7.47983e-06	-7e-06	-0.00179981	0.003163	-0.000105126	4.42313e-06
20	0.000174586	0.000174586	-2.42677e-06	2e-06	0.00211709	0.002998	-8.32099e-05	9.4813e-10
21	-7.37494e-06	-7.37494e-06	-1.03743e-05	1e-05	0.00116062	0.007517	-0.000403298	-2.34907e-07
22	0.000318146	0.000318146	-3.56854e-07	0	0.000342172	0.004552	-0.000143937	-3.44049e-06
23	0.000219936	0.000219936	-5.73691e-05	5.7e-05	-3.46048e-05	0.005996	-7.9978e-05	-1.47484e-06
24	-3.3269e-05	-3.3269e-05	8.04835e-05	-8e-05	-0.000309839	0.001859	-0.000585482	-8.11182e-07
25	-3.0953e-05	-3.0953e-05	2.52165e-05	-2.5e-05	-0.000714261	0.003199	-1.25965e-05	-8.75618e-11
26	4.59784e-05	4.59784e-05	-2.96622e-06	3e-06	-0.000149539	0.002075	-7.3691e-05	-1.73392e-05
27	1.93073e-06	1.93073e-06	1.50715e-05	-1.5e-05	-4.61288e-06	0.008601	-8.9418e-05	-3.65357e-09
28	2.62069e-08	2.62069e-08	5.72481e-05	-5.7e-05	-8.02476e-08	0.007844	-0.000274513	7.80709e-07
29	-0.000226977	-0.000226977	5.49532e-05	-5.5e-05	1.19969e-05	0.007718	-0.00155634	2.67402e-07
30	8.22938e-06	8.22938e-06	-4.12308e-06	4e-06	0.00010804	0.000803	-0.000375769	9.54326e-09
31	0.000460851	0.000460851	-4.16975e-05	4.2e-05	1.0001e-05	0.000199	-1.23795e-06	5.12427e-10
32	-2.38338e-05	-2.38338e-05	2.34585e-05	-2.3e-05	6.90813e-05	7e-06	1.01219e-05	1.60775e-10
33	8.17146e-06	8.17146e-06	-3.95217e-06	4e-06	-1.93625e-05	-4.2e-05	8.72251e-06	2.78025e-07
34	3.59493e-06	3.59493e-06	1.01437e-05	-1e-05	-1.99387e-05	-0.0001	-2.99787e-05	-5.29909e-07
35	0.000288272	0.000288272	-8.03683e-06	8e-06	-0.000193216	-0.000124	0.000180311	-7.79756e-08
36	7.15715e-05	7.15715e-05	3.02406e-06	-3e-06	-4.55748e-06	-7.2e-05	4.17699e-05	-1.12415e-07
37	0.000666645	0.000666645	7.04476e-06	-7e-06	-2.60186e-05	-1.1e-05	3.13012e-05	-1.61766e-09
38	0.000346745	0.000346745	6.83889e-05	-6.8e-05	-0.00122978	1e-06	-2.02375e-05	-5.05649e-08
39	0.000182579	0.000182579	4.22986e-05	-4.2e-05	-0.0105194	-2.2e-05	5.33119e-05	-2.16181e-08
40	0.000386043	0.000386043	1.14842e-07	0	-0.00483469	3e-05	4.825e-06	-4.27306e-07
41	1.01919e-05	1.01919e-05	4.26406e-06	-4e-06	-0.00101001	-2e-05	4.6164e-06	-2.05833e-06
42	0.000524085	0.000524085	-1.26338e-05	1.3e-05	-0.00359238	0.000732	2.23607e-06	-3.12228e-06
43	0.000532886	0.000532886	-1.81949e-05	1.8e-05	-0.00656266	0.000828	4.99679e-06	-1.82659e-05
44	0.000535137	0.000535137	-2.52567e-05	2.5e-05	-0.00109809	0.001901	-3.0873e-06	-1.01966e-05
45	2.22634e-05	2.22634e-05	1.05155e-06	-1e-06	-0.000156569	0.00153	-4.13784e-06	7.43104e-06
46	6.57579e-05	6.57579e-05	-1.14924e-05	1.1e-05	-2.05816e-06	0.001107	-8.20438e-05	-9.32447e-07
47	5.67105e-05	5.67105e-05	-1.23509e-05	1.2e-05	-8.119e-06	-0.000315	-3.1183e-05	-5.30242e-06
48	0.000232836	0.000232836	-5.94989e-06	6e-06	-8.45912e-06	0.001552	0.0004361	-0.000148322
49	0.000197677	0.000197677	7.67037e-08	0	-0.000149957	0.001811	0.00111565	-0.000387762
50	0.000662532	0.000662532	-4.09094e-05	4.1e-05	4.72553e-05	0.002437	-0.00101224	-2.28318e-07
51	1.81471e-05	1.81471e-05	3.26513e-05	-3.3e-05	-2.46121e-05	-0.000636	0.000193299	-2.38178e-05
52	5.81396e-05	5.81396e-05	-4.47848e-08	0	-3.14219e-05	-0.000921	-0.000311765	-9.68919e-06
53	-7.41149e-05	-7.41149e-05	6.38647e-05	-6.4e-05	-1.64808e-05	-0.001005	0.000994913	-0.000204068
54	0.000193281	0.000193281	4.29496e-06	-4e-06	3.41834e-05	-0.000245	0.00011293	-5.91588e-06
55	0.000339966	0.000339966	-1.20183e-06	1e-06	1.40334e-07			-2.28321e-07
56	0.000214803	0.000214803	-7.23879e-06	7e-06	1.44879e-05			-7.78875e-09
57	-0.00102119	-0.00102119	9.18001e-06	-9e-06	7.34074e-05
58	-6.21888e-06	-6.21888e-06	-1.25461e-06	1e-06	-5.70794e-05
59	8.25082e-06	8.25082e-06	-5.97352e-05	6e-05	0.000222578
60	-4.15466e-05	-4.15466e-05	9.95691e-06	-1e-05	8.76728e-05
61	-3.22837e-06	-3.22837e-06	-6.13881e-06	6e-06	-0.00312124
62	-0.000291455	-0.000291455	-1.95877e-05	2e-05	-0.000264294
63	0.000123097	0.000123097	3.74354e-05	-3.7e-05	-0.00698989
64	-5.35331e-06	-5.35331e-06	6.99606e-06	-7e-06	-0.0206993
65	-1.38731e-05	-1.38731e-05	-3.30806e-05	3.3e-05	0.00101416
66	3.09412e-06	3.09412e-06	-1.71842e-06	2e-06	-0.00040935
67	9.69421e-05	9.69421e-05	1.20704e-05	-1.2e-05	-0.000992171
68	0.000192354	0.000192354	1.64254e-05	-1.6e-05	-0.0104414
69	0.00176932	0.00176932	-1.7002e-06	2e-06	1.84898e-05
70	0.000837421	0.000837421	-5.71358e-06	6e-06	0.000187621
71	0.00193094	0.00193094	1.17635e-06	-1e-06	2.59892e-05
72	0.00169166	0.00169166	-3.13267e-05	3.1e-05	-1.77156e-05
73	0.00150254	0.00150254	9.38125e-05	-9.4e-05	-8.57776e-05
74	0.00109647	0.00109647	-9.3272e-08	0	-3.03065e-05
75	0.00060568	0.00060568	-9.09744e-06	9e-06
76	-8.19871e-05	-8.19871e-05	1.37442e-06	-1e-06
77	0.00012227	0.00012227	6.2995e-06	-6e-06
78	-1.87436e-07	-1.87436e-07	-1.15649e-05	1.2e-05
79	0.000240293	0.000240293	8.65506e-05	-8.7e-05
80	-4.39413e-06	-4.39413e-06	1.67333e-05	-1.7e-05
81	-0.00134785	-0.00134785	-2.71346e-05	2.7e-05
82	-0.00110169	-0.00110169	-0.000308394	0.000308
83	-0.000666349	-0.000666349	-8.05633e-05	8.1e-05
84	-0.00019747	-0.00019747	-0.000192133	0.000192
85	0.000114056	0.000114056	3.9503e-06	-4e-06
86	-0.000555698	-0.000555698	4.95726e-05	-5e-05
87	-0.000447367	-0.000447367	6.56777e-06	-7e-06
88	7.45025e-05	7.45025e-05	-4.111e-05	4.1e-05
89	-0.00063593	-0.00063593	4.84518e-08	0
90	-0.000362197	-0.000362197	-4.28286e-05	4.3e-05
91	-0.000548489	-0.000548489	-3.88897e-09	0
92	0.00157522	0.00157522	-3.31902e-07	0
93	0.00188515	0.00188515	1.48181e-06	-1e-06
94	0.00048735	0.00048735	7.1273e-06	-7e-06
95	-0.000173928	-0.000173928	3.59896e-07	0
96	0.00203999	0.00203999	5.98569e-07	-1e-06
97	0.0023268	0.0023268	-1.23564e-05	1.2e-05
98	-6.94089e-05	-6.94089e-05	8.94859e-05	-8.9e-05
99	6.09951e-07	6.09951e-07	-6.33363e-08	0
100	0.000128095	0.000128095	-4.1992e-07	0
101	-0.000357642	-0.000357642	-3.35887e-05	3.4e-05
102	0.0002314	0.0002314	-4.51159e-05	4.5e-05
103	-0.000102703	-0.000102703	-8.5688e-05	8.6e-05
104	-0.000471274	-0.000471274	-9.45744e-05	9.5e-05
105	-4.8247e-05	-4.8247e-05	0.000259123	-0.000259
106	-0.000880735	-0.000880735	-0.000131804	0.000132
107	-4.85072e-05	-4.85072e-05	-8.03224e-05	8e-05
108	-8.55249e-05	-8.55249e-05	-0.000207372	0.000207
109	-0.000163569	-0.000163569	-6.1241e-05	6.1e-05
110	-0.000326244	-0.000326244	-9.30971e-05	9.3e-05
111	7.11719e-06	7.11719e-06	0.000532703	-0.000533
112	-0.00100333	-0.00100333	0.000466048	-0.000466
113	-3.05496e-05	-3.05496e-05	0.000173605	-0.000174
114	-4.40261e-05	-4.40261e-05	0.000446717	-0.000447
115	-0.000289974	-0.000289974	0.000151649	-0.000152
116	-0.000525386	-0.000525386	0.000416764	-0.000417
117	-5.49808e-05	-5.49808e-05	0.000541939	-0.000542
118	-6.18956e-05	-6.18956e-05	0.000499074	-0.000499
119	-0.000217973	-0.000217973	0.000477838	-0.000478
120	-0.000172411	-0.000172411	0.000307663	-0.000308
121	5.36212e-06	5.36212e-06	0.000144324	-0.000144
122	-0.000565468	-0.000565468	0.000218591	-0.000219
123	-0.000176481	-0.000176481	0.000210428	-0.00021
124	-0.00123743	-0.00123743	0.000576965	-0.000577
125	-1.431e-07	-1.431e-07	0.000301684	-0.000302
126	-2.83405e-05	-2.83405e-05	0.000289199	-0.000289
127	-0.000116884	-0.000116884	0.000539669	-0.00054
128	-3.12061e-05	-3.12061e-05	0.000220201	-0.00022
129	-0.00037791	-0.00037791	0.000249032	-0.000249
130	-8.20915e-05	-8.20915e-05	0.000737188	-0.000737
131	-0.000319838	-0.000319838	0.000642746	-0.000643
132	-2.30678e-05	-2.30678e-05	0.000129501	-0.00013
133	4.9711e-05	4.9711e-05	9.50845e-05	-9.5e-05
134	5.99039e-05	5.99039e-05	6.53752e-05	-6.5e-05
135	-0.000277053	-0.000277053	1.25668e-05	-1.3e-05
136	-7.23527e-05	-7.23527e-05	7.01488e-06	-7e-06
137	5.37039e-08	5.37039e-08	4.19589e-05	-4.2e-05
138	-8.13791e-06	-8.13791e-06	-9.8143e-06	1e-05
139	-0.000282721	-0.000282721	-3.53426e-05	3.5e-05
140	8.1439e-05	8.1439e-05	-1.72562e-05	1.7e-05
141	-0.000514106	-0.000514106	5.0563e-06	-5e-06
142	-5.2356e-07	-5.2356e-07	1.55774e-05	-1.6e-05
143	-0.00017157	-0.00017157	1.32263e-05	-1.3e-05
144	4.55893e-06	4.55893e-06	-1.26857e-05	1.3e-05
145	-4.71231e-05	-4.71231e-05	4.81108e-06	-5e-06
146	-0.000181675	-0.000181675	-3.13516e-06	3e-06
147	-4.4325e-06	-4.4325e-06	-2.67605e-06	3e-06
148	-5.40824e-06	-5.40824e-06	1.89842e-05	-1.9e-05
149	-4.2698e-05	-4.2698e-05	-7.9427e-07	1e-06
150	9.3497e-06	9.3497e-06	-1.78833e-06	2e-06
151	2.48948e-09	2.48948e-09	-4.00225e-06	4e-06
152	6.53318e-06	6.53318e-06	-5.13994e-06	5e-06
153	8.4413e-05	8.4413e-05	2.09946e-06	-2e-06
154	2.40904e-05	2.40904e-05	-1.10457e-05	1.1e-05
155	0.000137741	0.000137741	-2.67407e-05	2.7e-05
156	1.989e-05	1.989e-05	-1.29145e-05	1.3e-05
157	-4.16344e-06	-4.16344e-06	-3.5125e-05	3.5e-05
158	9.13364e-06	9.13364e-06	-2.01066e-05	2e-05
159	2.03031e-05	2.03031e-05	1.11976e-05	-1.1e-05

## Sheet: Energy_matrix
relBE SortSeq
pos	val_A	val_C	val_G	val_T
110	0.002161	0.00864	0.009033	-0.019834
111	-0.000972	-0.000127	-0.046451	0.04755
112	-0.00471	-0.027029	0.044095	-0.012356
113	-0.014469	-0.006926	-0.005826	0.027221
114	0.043846	-0.011816	-0.001398	-0.030632
115	0.025415	0.006395	-0.015708	-0.016103
116	-0.007294	-0.022256	-0.012647	0.042197
117	-0.043712	0.002506	0.047727	-0.006522
118	0.046284	-0.007098	-0.023003	-0.016184
119	-0.011275	0.044707	-0.023319	-0.010113
120	0.036319	-0.013814	0.00676	-0.029265
121	-0.010959	0.002741	-0.016551	0.024768
122	-0.007452	-0.01064	-0.012412	0.030503
123	-0.009983	-0.009835	-0.010129	0.029947
124	-0.015075	-0.020365	0.04923	-0.01379
125	-0.02095	-0.006969	-0.008044	0.035963
126	0.035154	-0.0179	-0.00313	-0.014124
127	0.048137	-0.021737	-0.01262	-0.01378
128	-0.00821	-0.010793	-0.011619	0.030623
129	-0.019953	-0.001918	-0.01078	0.03265
130	0.056145	-0.002364	-0.047255	-0.006525
131	-0.00703	0.051821	-0.035434	-0.009357
132	0.023385	-0.006438	-0.01634	-0.000607
133	0.020042	0.007112	-0.020034	-0.00712
134	-0.020347	-0.003906	0.016425	0.007828
135	0.007294	-0.005764	0.003406	-0.004936
relBE RegSeq
pos	val_A	val_C	val_G	val_T
110	0.002161	0.00864	0.009033	-0.019834
111	-0.000972	-0.000127	-0.046451	0.04755
112	-0.00471	-0.027029	0.044095	-0.012356
113	-0.014469	-0.006926	-0.005826	0.027221
114	0.043846	-0.011816	-0.001398	-0.030632
115	0.025415	0.006395	-0.015708	-0.016103
116	-0.007294	-0.022256	-0.012647	0.042197
117	-0.043712	0.002506	0.047727	-0.006522
118	0.046284	-0.007098	-0.023003	-0.016184
119	-0.011275	0.044707	-0.023319	-0.010113
120	0.036319	-0.013814	0.00676	-0.029265
121	-0.010959	0.002741	-0.016551	0.024768
122	-0.007452	-0.01064	-0.012412	0.030503
123	-0.009983	-0.009835	-0.010129	0.029947
124	-0.015075	-0.020365	0.04923	-0.01379
125	-0.02095	-0.006969	-0.008044	0.035963
126	0.035154	-0.0179	-0.00313	-0.014124
127	0.048137	-0.021737	-0.01262	-0.01378
128	-0.00821	-0.010793	-0.011619	0.030623
129	-0.019953	-0.001918	-0.01078	0.03265
130	0.056145	-0.002364	-0.047255	-0.006525
131	-0.00703	0.051821	-0.035434	-0.009357
132	0.023385	-0.006438	-0.01634	-0.000607
133	0.020042	0.007112	-0.020034	-0.00712
134	-0.020347	-0.003906	0.016425	0.007828
135	0.007294	-0.005764	0.003406	-0.004936
CRP SortSeq
pos	val_A	val_C	val_G	val_T
0	-0.002123	0.019406	0.003126	-0.020409
1	-0.062872	0.054415	0.011063	-0.002606
2	-0.050577	-0.013408	0.023832	0.040153
3	-0.027922	0.027038	0.012092	-0.011208
4	-0.067301	0.042486	0.045708	-0.020892
5	-0.033852	0.030161	0.021898	-0.018207
6	0.030701	0.019638	0.025348	-0.075686
7	0.023057	0.036355	-0.076521	0.017109
8	0.007042	0.028233	0.037241	-0.072516
9	0.020636	0.049838	-0.100004	0.029529
10	-0.111022	0.027953	0.037939	0.04513
11	0.017655	-0.012465	0.030209	-0.035399
12	-0.003167	-0.035015	0.019454	0.018728
13	0.015139	-0.006103	0.019997	-0.029033
14	-0.025581	0.021174	-0.00747	0.011877
15	0.008479	0.013989	-0.01929	-0.003177
16	-0.037555	0.041437	0.005502	-0.009384
17	0.036831	0.008766	0.027494	-0.07309
18	0.021109	-0.101054	0.042504	0.037442
19	-0.078647	0.03667	0.033838	0.008139
20	0.005224	-0.087979	0.048457	0.034299
21	-0.0967	0.019722	-0.009527	0.086505
22	-0.033999	0.063598	-0.018428	-0.011171
23	-0.023829	0.030104	0.061467	-0.067742
24	-0.000673	0.016532	0.031143	-0.047003
25	0.034499	0.004804	0.030637	-0.06994
26	0.06413	0.000529	-0.012067	-0.052592
27	-0.006251	0.010768	0.015126	-0.019643
28	-0.040415	-0.010485	0.039969	0.01093
29	-0.018451	-0.007269	0.009119	0.016601
30	-0.021251	0.00397	0.005107	0.012175
31	-0.002694	-0.016319	0.025697	-0.006683
32	0.02223	-0.024854	0.006762	-0.004139
33	0.03274	-0.026649	0.016585	-0.022677
34	0.012743	-0.029332	-0.004444	0.021034
35	-0.012404	0.002566	-0.023643	0.03348
36	0.002434	0.016449	-0.027419	0.008535
37	0.00031	0.015955	-0.023395	0.00713
38	0.040484	-0.059857	-0.005669	0.025041
39	0.04558	0.040513	0.052975	-0.139067
40	0.032132	0.047283	0.018052	-0.097467
41	0.058613	0.056542	-0.10695	-0.008204
42	-0.086201	0.04604	0.034984	0.005176
43	0.022487	-0.02373	0.040785	-0.039542
44	-0.08409	0.038523	0.04691	-0.001343
45	-0.023359	0.041984	0.011743	-0.030369
46	0.006569	0.01106	0.022091	-0.03972
47	-0.011955	0.021563	0.020245	-0.029853
48	0.017016	0.019211	0.007467	-0.043694
49	-0.009316	0.009841	0.012735	-0.013261
50	0.011615	0.029762	0.002811	-0.044188
51	-0.043367	0.014733	0.031206	-0.002572
52	5.4e-05	-0.016206	0.011582	0.00457
53	0.013381	-0.017156	0.019088	-0.015313
54	0.014826	-0.015384	0.016871	-0.016313
55	0.043142	-0.024216	0.011966	-0.030892
56	0.005136	-0.013541	0.007866	0.000539
57	-0.014648	0.013729	-0.026368	0.027287
58	-0.000177	0.012602	-0.01589	0.003466
59	-0.033832	0.01003	-0.024976	0.048778
60	0.019592	0.008054	-0.022773	-0.004874
61	-0.015901	0.111285	-0.078512	-0.016872
62	0.002679	0.027796	-0.006852	-0.023623
63	-0.019835	0.057477	0.040139	-0.077781
64	-0.127969	0.044343	0.042689	0.040936
65	-0.009559	0.047123	0.020246	-0.057809
66	-0.06193	0.00233	0.06015	-0.00055
67	-0.039871	-0.023114	0.021709	0.041276
68	0.019979	0.045972	0.046321	-0.112272
69	-0.041527	0.008156	0.028313	0.005058
70	-0.013656	0.031311	0.006329	-0.023985
71	-0.010244	0.001072	0.018827	-0.009655
72	-0.000704	0.029474	-0.006727	-0.022044
73	-0.058722	0.01422	0.039983	0.00452
74	-0.01797	0.008034	-0.018225	0.028161
marR RegSeq
pos	val_A	val_C	val_G	val_T
89	-0.003421	0.010787	-0.02173	0.014364
90	0.054977	-0.02311	-0.027053	-0.004814
91	0.045188	-0.028828	-0.014165	-0.002194
92	-0.011914	0.020117	-0.000775	-0.007427
93	-0.027722	-0.008059	0.021547	0.014233
94	0.004477	-0.005753	0.011402	-0.010127
95	-0.015478	-0.020756	-0.008735	0.044969
96	-0.02299	-0.013489	0.015357	0.021123
97	0.011495	0.011853	0.01221	-0.035558
98	-0.017989	0.030982	-0.022406	0.009413
99	-0.023943	0.024951	-0.00737	0.006362
100	-0.006624	0.01304	0.011149	-0.017566
101	0.002489	0.044786	-0.020891	-0.026384
102	0.010677	-0.004064	0.015615	-0.022228
103	-0.000464	-0.002169	0.037966	-0.035334
104	-0.013781	0.064508	-0.028344	-0.022383
105	0.027922	-0.004068	-0.009085	-0.01477
106	0.064934	0.001607	-0.047319	-0.019222
107	-0.008258	0.025252	-0.014909	-0.002085
108	-0.00734	-0.022515	0.001126	0.028729
109	0.040541	-0.032883	-0.022014	0.014357
110	0.04775	-0.010681	-0.026494	-0.010575
111	-0.006425	0.000878	-0.028065	0.033611
112	0.00102	-0.012455	-0.018681	0.030116
113	-0.003951	0.014561	-0.007074	-0.003536
114	-0.003779	0.001519	0.001168	0.001092
115	0.001167	-0.008039	-0.014694	0.021567
