# Supplementary material for: Deciphering the regulatory genome of Escherichia coli, one hundred promoters at a time
Source: eLife. 2020 Sep 21;9:e55308. doi: 10.7554/eLife.55308 (PMC7567609; doi:10.7554/eLife.55308)
Supplement: Figure 5—source data 1. [file elife-55308-fig5-data1.xlsx]

## Sheet: Information_Footprint
position	info_phnA	info_ykgE_arabinose	info_ykgE_deltaYieP
0	0.000254269	-9.64351e-06	-1.5e-05
1	3.08291e-05	-1.91967e-06	-1.6e-05
2	8.26722e-06	-7.01154e-05	7e-05
3	0.00021168	-2.28377e-05	5.6e-05
4	6.43023e-07	-1.86923e-05	9.4e-05
5	2.35497e-06	-1.13352e-06	4.8e-05
6	9.97061e-05	-3.37445e-05	7.2e-05
7	6.35888e-06	-9.24409e-05	8.2e-05
8	1.80069e-06	-0.000628692	5.6e-05
9	4.25293e-07	-1.79655e-05	8.3e-05
10	2.33896e-05	3.21031e-05	1.7e-05
11	0.000179319	-1.01795e-05	0.000114
12	6.88998e-05	4.25837e-05	6.4e-05
13	0.000111289	-0.000214874	0.000131
14	7.9682e-06	-0.000108425	5e-05
15	8.33467e-05	-0.000121666	7.3e-05
16	2.53032e-06	-9.95061e-06	8.5e-05
17	4.96274e-05	-0.000149705	3.3e-05
18	7.07055e-05	-0.00016903	5e-06
19	4.11524e-05	-0.00011143	-4.1e-05
20	8.83481e-05	-7.79946e-05	-2e-05
21	1.94395e-08	-0.000730181	2.8e-05
22	2.85591e-05	0.000205736	3.4e-05
23	2.04236e-05	-0.000345393	0.00012
24	2.07431e-05	-3.05609e-05	0.00016
25	9.18367e-05	-0.000269917	0.000141
26	1.89441e-05	-0.000129433	-0.000126
27	0.000111482	-5.50316e-07	-0.000104
28	6.22571e-06	-5.55737e-05	-9.4e-05
29	5.94248e-05	-0.000270927	0.000103
30	0.000251696	-1.17983e-08	1e-06
31	0.000264816	-3.06113e-05	-2e-05
32	5.21529e-06	-8.28143e-05	-9.8e-05
33	0.000136348	-3.69296e-05	-9e-05
34	1.83103e-05	-4.6571e-05	-0.000127
35	4.48069e-08	-9.21937e-05	-1.8e-05
36	3.60841e-05	-0.000143497	-2.6e-05
37	0.000145046	7.4079e-07	3.1e-05
38	3.29565e-05	-3.63311e-06	4.7e-05
39	2.25038e-06	-6.33772e-05	8.9e-05
40	7.42835e-06	-0.000116882	9.3e-05
41	1.92097e-07	-0.00022579	0.000105
42	5.26776e-05	-1.06641e-07	0.000213
43	0.000140256	-0.000716508	0.000237
44	0.000200106	-4.34885e-05	0.000185
45	0.000228548	4.82529e-06	4.6e-05
46	4.57819e-05	3.53038e-06	2e-05
47	6.12493e-05	-3.48826e-05	0.000143
48	0.000370733	-1.40004e-05	0.001119
49	3.78472e-05	-0.000885476	0.002754
50	1.12424e-06	-0.00102232	0.004083
51	0.00020291	-0.00250272	0.003797
52	7.93181e-05	-0.00144887	0.002212
53	3.94462e-05	-0.00206626	0.00102
54	0.000111665	-0.000160329	0.000607
55	0.00011572	-0.000555264	0.000644
56	2.98184e-05	-9.75384e-05	0.000359
57	0.000213174	-5.09214e-05	6.8e-05
58	0.000385898	-7.4628e-05	2e-06
59	6.51974e-05	1.85517e-06	0.000156
60	4.87072e-06	-0.00036033	0.000156
61	2.09826e-05	2.21686e-06	0.000129
62	4.23983e-05	1.78387e-05	-8e-06
63	2.26868e-05	1.00412e-05	-8e-06
64	8.44231e-05	5.59798e-07	2e-06
65	0.000168026	-4.10901e-07	0.000391
66	1.36265e-05	-9.91114e-05	0.000487
67	6.86732e-05	-0.00175301	0.000549
68	1.84069e-06	2.58919e-07	0.000159
69	1.0127e-05	3.36375e-06	-0.00022
70	1.29183e-05	0.000282465	-0.00034
71	0.000193228	0.000145986	-0.000551
72	0.000186738	-0.00011472	0.002567
73	2.99244e-06	-0.000292669	0.002812
74	2.6101e-05	-0.00515834	0.002904
75	2.11988e-05	-0.000365649	0.001188
76	8.14931e-06	-7.5587e-05	0.002746
77	8.74813e-05	-0.00098399	0.00274
78	0.000106772	-0.00179759	0.001624
79	1.11757e-05	8.43708e-05	-0.000137
80	8.87624e-05	0.000109646	-4.1e-05
81	0.000109621	0.00101685	-4e-05
82	0.000552818	0.00214752	-2.4e-05
83	0.000458705	0.00120927	-7.5e-05
84	8.30841e-07	0.000575759	-9.2e-05
85	1.0943e-07	0.00377011	-8.1e-05
86	1.00562e-05	0.00113721	4e-06
87	0.0003107	0.000201522	5e-06
88	6.37412e-06	0.000628948	-1.5e-05
89	0.000110963	0.00463586	-5.1e-05
90	0.0011962	0.00186253	-7e-06
91	0.000575357	0.000891906	-3e-06
92	2.69862e-05	0.00175302	3.1e-05
93	1.39679e-06	0.000584778	2e-05
94	0.000128487	0.000130121	0.000225
95	4.00392e-05	-3.78992e-05	0.000241
96	1.25768e-06	8.01579e-05	0.000218
97	4.3374e-05	3.96387e-05	-7e-05
98	0.000150947	3.59074e-05	-8.7e-05
99	2.91943e-05	-0.000300613	-2.9e-05
100	6.19555e-05	-3.00232e-06	0.000166
101	9.13231e-06	-0.000142515	0.000168
102	1.58374e-05	-8.3058e-06	0.000199
103	0.000102355	-1.29805e-06	0.000102
104	0.000399374	-0.000302789	0.0001
105	0.000378474	-4.77765e-05	9e-06
106	4.37385e-05	-5.88815e-05	-9.1e-05
107	0.000201047	-2.03206e-05	-4.2e-05
108	6.3491e-05	-7.25662e-05	-1.9e-05
109	0.000323421	-0.000382215	-3e-06
110	1.31544e-06	-3.16471e-05	-4.7e-05
111	2.76201e-05	-6.98103e-05	-5.4e-05
112	3.66119e-07	-0.000645345	4.6e-05
113	5.77084e-10	1.14672e-06	4.1e-05
114	3.50372e-05	-4.86812e-07	2e-05
115	2.91638e-07	-2.7747e-05	6.2e-05
116	4.37388e-06	-2.00913e-06	-5.3e-05
117	0.000105108	9.80236e-05	-8.9e-05
118	2.17726e-06	0.000225983	-0.000228
119	3.20088e-05	0.000412248	-0.000154
120	0.000101229	8.38093e-05	-0.00014
121	0.000327326	3.91039e-06	-7.7e-05
122	0.000468762	-7.03163e-05	-3.4e-05
123	1.01466e-07	-9.55727e-05	-5.1e-05
124	4.03455e-06	2.46724e-05	-5.7e-05
125	4.68607e-05	0.000338841	-2.6e-05
126	4.6356e-05	2.12755e-06	3.5e-05
127	5.44316e-05	1.34482e-05	4.8e-05
128	5.72075e-06	-0.000135936	-5e-06
129	2.23859e-05	-1.31308e-06	-2.5e-05
130	6.83681e-05	9.20714e-05	-3e-05
131	4.19282e-06	1.9328e-05	-0.000127
132	0.000146304	9.46339e-05	-0.000126
133	0.000104685	0.000449483	-0.000153
134	1.40081e-05	4.85024e-05	-2.7e-05
135	2.40818e-05	-1.57207e-05	-0.000127
136	3.89313e-05	-0.000206713	-0.000149
137	3.5791e-06	-9.25962e-05	-0.000157
138	0.000131703	4.95266e-07	-9e-05
139	7.53898e-07	-3.77708e-06	1.2e-05
140	2.16031e-05	-0.000131786	-1.5e-05
141	4.18018e-06	-0.000140874	5.2e-05
142	3.58053e-08	-0.000249482	1.9e-05
143	0.000105126	5.57378e-05	2.1e-05
144	0.000141776	8.78734e-05	-1.9e-05
145	0.000464088	-0.000436862	-3.2e-05
146	0.00024464	-1.54675e-06	1.6e-05
147	9.55471e-05	-0.000226271	-9e-06
148	0.000133024	-0.000208788	-1.1e-05
149	0.000736906	-0.000132062	-1.9e-05
150	2.92565e-06	-8.18083e-05	2.7e-05
151	3.88416e-05	-9.00023e-05	3.3e-05
152	6.38488e-07	-2.28745e-06	6.6e-05
153	7.25756e-06	5.52703e-06	-1.5e-05
154	4.56013e-05	2.6587e-05	-2.1e-05
155	6.75657e-06	-0.000117282	-9.3e-05
156	5.86412e-05	-8.8353e-06	-1.8e-05
157	1.85599e-05	-9.63873e-07	0
158	2.96308e-07	-7.31935e-08	0
159	6.58679e-05	-0.000279097	0

## Sheet: Energy_Matrices
#This file contains the energy matrices displayed in figure 4. The expected
#transcription start site (from prexisting data)
# for all designed sequences was at position 115, although
#the true transcription start site was not necessarily there.
#YciT regulating phnA
pos val_A val_C val_G val_T
80 0.024275 0.011875 0.008594 -0.044744
81 -0.022382 -0.000316 -0.000279 0.022977
82 0.001640 -0.038142 0.085487 -0.048985
83 -0.005558 -0.058459 0.042239 0.021778
84 -0.001344 0.009086 -0.019429 0.011687
85 -0.004102 0.003415 -0.007306 0.007994
86 -0.000384 -0.002240 0.005137 -0.002513
87 0.034692 0.011549 -0.003806 -0.042434
88 -0.000348 -0.007948 -0.006620 0.014917
89 -0.030403 0.008303 0.002298 0.019803
90 -0.069282 0.016264 0.019443 0.033575
91 -0.051258 -0.011142 0.050190 0.012210
92 -0.018229 -0.009085 0.030346 -0.003033
93 0.005787 -0.003492 0.003971 -0.006266
94 -0.005764 -0.020068 0.036296 -0.010463
#YieP regulating ykgE
pos val_A val_C val_G val_T
80 0.021619 -0.048642 0.022599 0.004425
81 0.037733 -0.039360 -0.063054 0.064680
82 -0.016837 -0.016928 -0.059376 0.093142
83 -0.042512 0.011187 -0.039261 0.070587
84 0.008487 -0.035853 0.048144 -0.020778
85 -0.102469 -0.005318 -0.015999 0.123786
86 -0.014368 0.067522 -0.016299 -0.036855
87 0.029126 0.015873 -0.025139 -0.019860
88 -0.076313 0.034550 -0.010320 0.052082
89 0.135809 -0.016582 -0.069668 -0.049558
90 -0.061136 0.086246 -0.020538 -0.004572
91 0.060430 -0.020608 -0.018669 -0.021154
92 0.084647 -0.083916 0.001152 -0.001884
93 0.049111 -0.051813 -0.002800 0.005502
94 0.018523 -0.044459 0.002611 0.023325

## Sheet: PWM
#This is the data for sequence logos. Each row represents a base pair position in the logo
#and each entry represents the probability of being the base displayed on the
#top of that column.
#YieP regulating ykgE.
A C G T
0.361981 0.041375 0.385405 0.211239
0.288840 0.026654 0.012689 0.671818
0.029719 0.030598 0.008095 0.931587
0.023663 0.131374 0.027052 0.817911
0.191083 0.049193 0.683324 0.076400
0.000810 0.017535 0.012549 0.969107
0.062923 0.844813 0.061155 0.031109
0.479402 0.326814 0.090440 0.103343
0.010179 0.338686 0.083056 0.568079
0.986791 0.008609 0.001632 0.002968
0.008694 0.908147 0.032021 0.051138
0.802662 0.065459 0.069558 0.062322
0.871638 0.004582 0.065818 0.057962
0.665804 0.029124 0.135218 0.169855
0.340933 0.048949 0.213843 0.396275
#YciT regulating phnA
A C G T
0.002815 0.008315 0.010981 0.977888
0.746810 0.118794 0.118422 0.015974
0.009602 0.288905 0.000008 0.701485
0.010799 0.987942 0.000194 0.001064
0.152895 0.065213 0.731230 0.050662
0.306807 0.167510 0.415636 0.110047
0.246741 0.298170 0.159550 0.295540
0.001378 0.010115 0.037173 0.951335
0.200093 0.393467 0.351577 0.054863
0.894793 0.034733 0.057783 0.012691
0.998547 0.000731 0.000559 0.000163
0.962239 0.033143 0.000183 0.004434
0.565529 0.268990 0.009510 0.155972
0.137943 0.312742 0.166131 0.383183
0.166955 0.579521 0.004877 0.248647
