# Supplementary material for: Deciphering the regulatory genome of Escherichia coli, one hundred promoters at a time
Source: eLife. 2020 Sep 21;9:e55308. doi: 10.7554/eLife.55308 (PMC7567609; doi:10.7554/eLife.55308)
Supplement: Figure 6—source data 1. [file elife-55308-fig6-data1.xlsx]

## Sheet: Sheet1
gene	start	end	type	identity	RNAP
thiM	-12	4	repressor		104
idnK	-48	-27	repressor	YgbI	103
ybeZ	15	29	repressor		144
WaaA-coaD	-53	-39	activator		102
dinJ	5	14	repressor		104
mscM	20	36	repressor		150
mscS	-23	-14	activator		104
ycbZ	-39	-18	activator		107
ybiO	1	21	repressor		134
tig	-15	1	repressor	GlpR	104
iap	3	29	activator		148
iap	-28	-13	repressor		103
iap	22	39	repressor		148
dcm	-15	-5	repressor		149
yehU	-50	-25	activator	FNR	107
ygjP	-61	-46	activator		92
ybjL	-87	-78	repressor		104
ybjL	-20	-2	repressor		104
ybjL	3	13	repressor		104
phnA	-36	-22	repressor		104
ymgG	-56	-31	activator		103
ymgG	-111	-97	repressor		103
maoP	-100	-55	activator	HdfR	94
maoP	-55	-35	activator	PhoP	94
maoP	-25	-11	repressor	GlpR	94
rapA	-34	11	repressor	GlpR	105
ykgE	-102	-80	activator	FNR	74
ykgE	-45	-16	repressor	YieP	74
pcm	-60	-44	repressor		104
pcm	-15	-4	repressor		104
yedJ	-40	-12	repressor		85
ydjA	-10	5	repressor		102
ilvC	-69	-38	activator		107
ilvC	-35	-23	repressor	IlvY	107
ilvC	-15	0	repressor		107
rhlE	-21	-5	repressor	GlpR	104
thrLABC	-57	-41	activator		101
mutM	-23	-9	repressor		104
arcA	-99	-63	activator	FNR	103
arcA	-64	-56	repressor	CpxR	103
coaA	-37	1	repressor		103
aphA	-71	-30	activator	FNR	103
aphA	-73	-62	repressor	DeoR	103
aphA	-21	1	repressor		103
fdhE	-71	-48	activator	FNR	103
fdhE	-48	-33	activator	ArcA	103
sdiA	-66	-41	repressor		60
ybjX	-90	-72	activator	PhoP	103
ybjX	-41	-25	activator	PhoP	103
ybjX	-95	-70	repressor	HNS/StpA	103
ybjX	-95	-70	repressor	HNS/StpA	103
yeiQ	-77	-51	activator	FNR	103
yehS	-4	5	activator		123
yedK	-14	27	repressor		128
dusC	-35	-20	repressor		92
yecE	-15	5	repressor		114
uvrD	6	14	repressor	LexA	103
leuABCD	-18	1	repressor	YgbI	104
tff-rpsB-tsf	-8	7	repressor	GlpR	103
groSL	5	18	activator		133
yicI	-112	-95	activator		121
yicI	-65	-40	activator		121
yicI	-35	-16	activator		121
rcsF	-71	-53	activator		104
bdcR	-27	-4	repressor	NsrR	105
yjjJ	-24	18	repressor	MarA	126
yjjJ	30	45	repressor		126
