# Supplementary material for: Deciphering the regulatory genome of Escherichia coli, one hundred promoters at a time
Source: eLife. 2020 Sep 21;9:e55308. doi: 10.7554/eLife.55308 (PMC7567609; doi:10.7554/eLife.55308)
Supplement: Figure 7—source data 1. [file elife-55308-fig7-data1.xlsx]

## Sheet: Information_Footprints
	#Information footprints are already smoothed
	Position	rapA_heat_info	arcA_Anaero_info	aphA_Anaero_info	tig_glpR_info	rhle_LB_info	yehU_Anaero_info	tff-rpsB-tsf_arabinose_info	ykgE_arabinose_info	yeiQ_Anaero_info	tff-rpsB-tsf_heat_info	maoP_glpR_info	ykgE_Anaero_info	rapA_arabinose_info	fdhE_LB_info	yehU_arabinose_info	rhle_M9_info	tig_arabinose_info	maoP_heat_info	yeiQ_arabinose_info	tig_M9_info	tff-rpsB-tsf_glpR_info	maoP_arabinose_info	aphA_arabinose_info	arcA_arabinose_info	fdhE_Anaero_info
	-114	3.9e-05	0.000126342	3.57065e-06	1.50367e-05	-0.000178414	7.18978e-05	4.21916e-05	-2.72262e-05	0.000183349	-1.62216e-05	-0.000272401	-4.7e-05	-2.7637e-05	-6.96986e-05	2.78364e-05	1.24129e-06	-1.4042e-05	-0.000116	-0.000313973	-7.88706e-06	-2.27955e-05	5.91153e-05	-4.29835e-05	-6.55428e-05	-6.79696e-07
	-113	9.4e-05	0.000100293	1.1187e-05	1.83623e-05	-0.000149319	-9.92485e-05	4.20927e-05	-3.16243e-05	0.000172699	-2.77342e-05	-0.000252242	-2.6e-05	5.51222e-06	-6.44083e-05	0.000180387	3.78717e-06	-6.72817e-06	-0.000109	-0.000269092	-8.17372e-06	-5.18258e-05	0.000143483	-3.22805e-05	-7.34315e-05	-2.58188e-05
	-112	0.000113	1.87545e-06	-2.09468e-06	5.27241e-05	-9.6255e-05	-0.000126761	4.91453e-05	-3.72152e-05	0.000130985	-4.17512e-05	-7.60066e-05	3.1e-05	2.32899e-05	-5.71291e-05	0.000190657	6.32449e-06	-7.35158e-06	-2.4e-05	-9.49931e-05	-1.44236e-05	-6.17165e-05	1.75117e-05	-8.26062e-05	-9.21243e-05	-2.68511e-05
	-111	0.000112	-2.90449e-05	-1.42117e-05	1.64775e-05	0.000122592	-0.000125197	6.42639e-06	-1.42212e-05	-0.000163005	-4.30927e-05	2.74127e-05	5.9e-05	4.43194e-05	-4.04505e-06	0.000155646	2.55926e-06	-1.04319e-05	-6.8e-05	-6.20332e-05	4.1171e-06	-2.33717e-05	-2.74755e-05	-7.95721e-05	-0.000116937	-7.27906e-07
	-110	0.000147	4.40261e-05	-0.000162626	9.33766e-06	0.000146743	-1.0652e-06	9.74045e-06	-1.78568e-05	-0.000146295	-1.50079e-05	1.05307e-05	6.7e-05	-9.20243e-06	-6.62775e-06	1.94738e-05	2.34707e-06	-2.7365e-05	-7.3e-05	-6.89404e-05	6.58596e-06	-2.56201e-05	-2.01802e-05	-8.31806e-05	-0.000118865	-3.97389e-05
	-109	4.8e-05	3.78792e-06	-0.000134744	-2.33092e-05	9.53977e-05	2.21363e-05	1.06468e-05	-4.24396e-05	-0.00016627	4.01023e-05	-7.98796e-07	4e-05	-2.74038e-05	-4.17888e-06	-3.27459e-05	1.78371e-06	-3.14544e-05	-9.9e-05	-0.000230394	-3.72926e-06	-1.6438e-06	-1.1515e-05	-2.4918e-05	-7.40748e-06	4.58131e-05
	-108	0.000206	1.39355e-06	-5.5747e-05	-2.00239e-06	2.39612e-05	7.41221e-05	1.35451e-05	-0.000251626	-2.65008e-06	6.56159e-05	3.72884e-06	6.5e-05	-9.77682e-05	3.5772e-05	-4.18828e-05	6.658e-06	-5.4915e-05	1.1e-05	-0.000160451	-1.86391e-05	1.09535e-05	-8.1945e-06	-0.000252474	-2.736e-05	6.093e-05
	-107	0.000351	-2.61303e-05	8.57859e-05	1.40246e-05	-2.27242e-06	0.000177742	-1.60227e-05	-0.000246366	-2.20396e-05	3.07905e-05	7.34988e-06	7.9e-05	-7.25766e-05	4.82801e-06	-6.73976e-05	9.13729e-06	-6.13164e-05	9e-06	-0.000207392	-1.94264e-05	1.42134e-05	-6.56513e-06	-0.00026395	-9.70927e-05	6.77829e-05
	-106	0.000925	2.09713e-05	5.81712e-05	8.20622e-06	2.18229e-06	0.000163757	-6.60616e-05	-0.000204851	-2.26009e-05	9.74922e-05	-1.65324e-05	6.4e-05	-0.000253395	-1.98491e-05	-1.73899e-05	6.34832e-06	-5.51389e-05	-4.9e-05	-8.02612e-05	-1.89471e-06	7.90371e-05	6.67624e-06	-0.000277929	-0.000114136	-0.000147766
	-105	0.001347	2.89061e-05	-3.72012e-06	5.68293e-05	3.30372e-05	0.000115259	-6.52794e-05	1.31936e-06	-2.21228e-05	9.35714e-05	-5.9365e-05	2.4e-05	-0.000173682	-2.65548e-05	-3.05724e-05	1.38077e-06	-3.09665e-05	-8.4e-05	-0.00014716	-3.79686e-06	0.000102692	4.14877e-05	-4.15154e-05	-0.000237506	-0.000138981
	-104	0.001695	2.7585e-05	-4.54769e-06	3.94506e-05	3.38633e-05	1.14272e-05	-4.83315e-05	2.15024e-05	6.1307e-05	9.75466e-05	-7.08479e-05	-4.3e-05	-0.000133703	1.85668e-05	-5.26952e-06	2.35131e-06	-8.25071e-06	-8.3e-05	-6.78674e-05	-2.51823e-06	0.000110179	4.0925e-05	-5.04483e-05	-0.000872598	-0.000133944
	-103	0.001142	1.60453e-05	3.61639e-06	3.68424e-05	7.94016e-05	7.49143e-06	-5.30658e-06	-6.08234e-05	0.000263725	4.03245e-05	-0.000143437	0.000144	0.000138498	0.000136672	-3.85518e-05	1.72975e-06	-8.23535e-06	-0.000116	-2.81673e-05	-3.8778e-06	3.80415e-05	-6.32492e-05	-3.40051e-05	-0.00126395	7.68463e-05
	-102	0.000669	-1.15314e-05	2.32652e-05	4.83715e-06	5.18387e-05	3.70729e-05	-2.55318e-06	-9.35719e-05	0.000207868	3.14894e-05	-7.55598e-05	0.000361	0.000125103	5.17186e-05	-0.000153667	1.74405e-06	-5.26192e-06	-8.4e-05	6.72209e-05	1.06333e-06	8.696e-06	-0.000138173	-5.06386e-05	-0.00128224	5.51649e-05
	-101	0.000108	1.1249e-05	1.73959e-05	5.86015e-06	4.97248e-05	4.20183e-05	4.0161e-06	-0.000148322	0.000105649	2.86768e-05	-2.70594e-05	0.000813	0.000112375	3.80032e-05	-0.000163551	-1.22256e-06	1.27911e-05	-4.9e-05	-4.85017e-05	-1.41028e-06	-1.1061e-05	-0.000149737	-2.80729e-05	-0.00122038	7.28883e-05
	-100	0.000609	0.000315478	1.0553e-05	1.73409e-05	5.57401e-05	4.96941e-05	6.05456e-06	-8.0014e-05	-8.58369e-05	-5.65077e-06	7.70231e-05	0.000661	3.31827e-05	-9.33715e-05	-0.000122285	-1.06486e-06	2.22748e-05	7.1e-05	-9.68829e-05	-1.12457e-05	-1.19272e-05	-7.09158e-05	-2.27085e-05	-0.00159899	-1.37748e-05
	-99	0.000498	0.000336314	4.81274e-05	6.52624e-06	5.82309e-05	-1.97914e-05	-3.29509e-06	-9.3774e-05	5.98369e-05	-8.23624e-05	5.77475e-05	0.000751	0.000108581	-8.56281e-05	-2.28822e-05	9.02829e-07	1.91431e-05	5.5e-05	-0.000113639	-5.14319e-05	-3.93047e-05	-3.06569e-05	5.12983e-05	-0.00145177	-2.10468e-05
	-98	0.000471	0.000305266	5.40259e-05	5.52276e-06	5.82736e-05	-3.26053e-05	-1.80695e-05	-0.000109562	9.24165e-05	-1.17622e-05	1.12008e-05	0.001172	0.000101319	-8.28981e-05	-1.31706e-05	-1.12906e-07	1.47772e-06	3.9e-05	-5.32079e-05	-4.26194e-05	2.43702e-05	-4.15712e-05	6.76068e-05	-0.00122839	-2.20281e-05
	-97	1.7e-05	3.42501e-07	1.41305e-05	-2.73638e-06	-1.22506e-05	-4.69137e-05	-5.47339e-05	-0.000143388	0.000306271	-7.44484e-05	-5.88504e-05	0.001466	3.19513e-05	-4.72128e-05	-3.96748e-05	1.34994e-06	-1.39627e-05	-7.8e-05	-0.000137901	-3.85312e-05	-1.29185e-06	-1.096e-05	7.63119e-05	-0.000529622	-1.988e-07
	-96	-4e-05	5.84995e-05	-2.61752e-05	1.89476e-05	-3.01876e-05	-6.51415e-05	-7.00908e-05	-0.000119485	0.000226533	7.52055e-06	-4.63045e-05	0.002091	-5.909e-05	8.56369e-05	-1.29351e-05	6.78861e-06	-7.91695e-05	-1.7e-05	-0.000192942	2.84e-06	8.21363e-05	-1.03074e-05	-2.52033e-05	-0.000863868	2.52209e-05
	-95	-3.4e-05	5.07443e-05	-2.79308e-05	1.84915e-05	-1.77226e-05	-0.000118371	-6.66368e-05	-0.000306535	4.11952e-05	-2.59198e-05	-2.12587e-05	0.001998	-8.12367e-05	8.44563e-05	-1.80852e-05	1.19746e-05	-8.05356e-05	-4e-06	-9.37824e-05	8.32656e-06	3.35437e-05	2.46694e-05	-4.52133e-05	-0.000429819	8.75731e-06
	-94	-0.000142	4.44979e-05	2.39744e-05	3.15007e-05	1.28353e-05	-9.88813e-05	-4.36617e-05	-0.000200813	-0.000167334	0.000112041	5.53968e-05	0.001583	-2.36388e-05	8.33811e-05	-0.0001354	7.26476e-06	-6.54767e-05	9.5e-05	2.94005e-05	1.11434e-05	5.88103e-05	1.73404e-05	-5.24778e-05	-0.000354188	1.63069e-06
	-93	-0.000107	3.75194e-05	6.34512e-06	1.7928e-05	-4.52907e-05	-5.22492e-05	-4.41003e-05	-0.000289946	-0.000302873	0.00011648	3.97932e-05	0.00095	-2.22725e-05	-1.9157e-05	-0.000142769	1.53041e-06	9.98106e-06	3.7e-05	0.000111089	8.12601e-06	1.7354e-05	1.7787e-05	-7.85163e-06	-3.33691e-06	-2.91847e-05
	-92	-9.8e-05	0.0002894	-1.64204e-05	7.58348e-07	3.39857e-05	1.0806e-05	-3.36018e-05	-5.67392e-05	-0.000175317	8.29044e-05	1.19602e-05	0.000203	-3.43824e-07	6.3208e-05	-0.000146139	-6.92278e-06	3.20048e-05	4e-06	7.85405e-05	6.57105e-05	1.62126e-05	-1.44684e-06	-2.73558e-06	-9.74693e-05	2.64286e-05
	-91	6.2e-05	0.000304892	-2.29942e-05	-9.87585e-06	2.37332e-05	-2.35884e-05	-6.56873e-05	-0.00021529	-0.000181942	0.000176432	-1.17595e-05	0.000438	-4.98955e-05	8.80437e-05	-2.50228e-05	-4.01079e-06	3.1882e-05	-4e-06	4.8611e-05	7.18092e-05	6.02541e-05	-1.08781e-05	-4.93325e-05	-0.000109616	8.47838e-05
	-90	0.000127	0.000553175	9.76278e-06	-3.94581e-05	9.64249e-05	-2.67751e-05	-1.83943e-05	-0.000143304	-5.41904e-05	4.25873e-06	0.000112054	0.000183	-8.24236e-05	0.000107151	-8.71928e-06	-1.36465e-05	2.37016e-05	8.6e-05	2.10271e-05	7.37286e-05	9.75536e-06	-0.000177731	-5.41699e-05	-0.000110875	0.000100873
	-89	0.000112	0.000746692	9.11462e-05	-2.57679e-05	-2.72437e-05	-2.11798e-05	-1.75025e-05	-0.0001333	7.26757e-08	-2.40525e-06	0.000192307	0.000243	-8.39602e-05	4.31809e-05	-5.55491e-06	-9.3064e-06	-4.79985e-06	0.000184	-2.22132e-05	6.33944e-06	3.3799e-05	-0.00020175	-0.000126989	-0.000104085	0.000138474
	-88	3.9e-05	0.00177479	0.000131611	-4.06912e-05	1.30951e-05	-1.20879e-06	-1.5873e-05	-6.18523e-05	6.69089e-05	-0.000275883	0.000203648	7.7e-05	-5.09868e-05	4.91435e-05	-2.84174e-05	-7.3761e-06	-1.67967e-05	0.00021	-0.000154615	-3.1919e-06	-1.25329e-05	-0.000196151	-0.000155194	-0.000297452	8.0243e-05
	-87	6e-06	0.00190898	9.71363e-05	-1.94564e-05	2.28689e-05	0.0002459	-4.17753e-05	-0.000109017	7.29301e-05	-7.71167e-05	7.99166e-05	0.000203	-0.000113011	3.5873e-05	-2.88682e-05	-4.94123e-06	-4.43904e-05	0.000121	-0.000203177	-3.24505e-06	1.3468e-05	-8.28002e-05	-0.000158513	-0.00028559	7.35616e-05
	-86	-2.9e-05	0.0014777	4.01105e-05	-1.55571e-05	3.76766e-05	0.000229139	-4.65121e-05	-0.000108837	8.55226e-05	0.000136535	-1.27985e-05	0.000157	-0.000111381	3.07805e-07	-0.000106649	-2.12293e-06	-4.11711e-05	1.7e-05	-0.0002081	-1.34279e-05	-9.40378e-06	-6.03633e-05	-8.51211e-05	5.60978e-05	-8.52162e-05
	-85	-1.6e-05	0.000262325	9.87813e-05	1.48582e-06	-5.4317e-05	0.000176539	-9.82887e-05	-0.000100517	8.09947e-05	0.000672936	1.62888e-06	0.000171	-0.00011024	0.000114435	-9.79989e-05	1.31028e-06	-4.46678e-05	-2e-06	-0.00013234	1.81057e-05	3.27185e-05	-3.04971e-05	-0.00011694	0.000255604	-4.64544e-05
	-84	3.9e-05	6.61999e-05	0.000108175	4.07657e-05	-2.46478e-05	3.44522e-05	-0.000102606	-3.78124e-05	0.000149307	0.000773597	-4.13689e-05	0.00023	-2.28406e-05	0.000127798	-0.000131333	-1.6754e-07	-2.62134e-05	-3.9e-05	-0.00016618	1.79558e-05	5.59295e-05	4.42014e-05	-0.000124589	0.000240015	-2.8608e-05
	-83	0.000106	0.000300324	0.000143392	4.60315e-06	8.61277e-06	4.41359e-05	-0.00012261	-5.01184e-05	0.00016075	0.000615971	-3.37726e-05	0.000549	-3.34973e-05	0.000177973	-0.000136776	-1.17093e-05	-8.37654e-06	-3.8e-05	-0.000195174	2.4787e-05	4.41026e-05	1.46885e-05	-0.000158949	-9.754e-05	6.57933e-05
	-82	0.000115	0.000487866	8.10367e-05	1.94105e-05	4.45822e-05	9.54637e-05	-3.0064e-05	-5.54383e-05	9.06295e-05	0.000202984	-5.46942e-05	0.000548	-8.33825e-05	6.54211e-05	-0.000135509	-1.80156e-05	-2.27376e-06	-3.8e-05	-0.000143194	8.93178e-05	-2.4586e-05	-1.53433e-05	-0.000362197	-0.000154008	1.16882e-05
	-81	0.000156	0.000369394	5.8481e-05	-1.00441e-05	-6.87485e-05	-1.57337e-07	-3.85683e-06	-5.85648e-05	5.8342e-06	0.000332697	4.20695e-05	0.000455	-7.94012e-05	-3.79258e-05	-0.000229068	-1.29844e-05	7.31528e-06	4.2e-05	-4.96554e-05	9.4467e-05	-2.67998e-05	-0.000160172	-0.000391458	-0.000137243	2.57126e-06
	-80	0.000124	0.000593971	1.83344e-05	2.36905e-05	-0.000155968	5.22254e-06	4.31285e-05	-9.40872e-05	-1.44049e-05	0.000285305	0.00019176	0.000151	-6.90848e-05	-5.90429e-06	-0.000140377	-5.33767e-06	-6.03214e-06	0.000282	-3.52317e-05	9.55687e-05	-2.67929e-05	-0.00028938	-0.000358612	-5.33088e-05	0.000298027
	-79	0.000109	0.000916168	-1.91451e-05	7.43965e-06	-5.64503e-05	2.10429e-05	5.28031e-05	-7.83165e-05	-3.07592e-06	0.000261952	0.000255626	0.000166	-1.9504e-05	-3.97447e-05	-0.000133878	-3.60695e-06	-9.53361e-06	0.000342	-7.04922e-05	1.35858e-05	2.40105e-06	-0.000347999	-0.000389355	-8.88138e-06	0.00028291
	-78	3.5e-05	0.00165002	-1.11287e-05	-2.31014e-06	9.54962e-05	-1.44579e-05	3.40097e-05	-4.87963e-05	9.18878e-05	2.07528e-06	0.000225681	1.6e-05	-3.36868e-05	0.000122839	-5.10117e-05	-1.04686e-05	-1.54638e-05	0.000353	-0.000212056	-2.23773e-07	-1.00797e-05	-0.000246397	-0.000358334	-0.000183022	0.000310225
	-77	3.5e-05	0.00124596	2.21431e-06	-9.29615e-06	0.000239819	4.01629e-07	1.29266e-05	-2.20898e-05	0.000283109	-3.80947e-05	0.00011927	7e-06	-3.7428e-05	5.3801e-05	-0.000184819	-1.01631e-05	-1.00016e-05	0.00017	-0.000347756	-1.83068e-06	-7.20923e-06	-0.000123317	-0.000377712	-0.000223561	-4.31067e-06
	-76	3e-05	0.000712896	1.07709e-05	1.03452e-05	0.000206817	3.83373e-05	3.33197e-06	-6.12976e-05	0.000539562	-5.24902e-05	0.000127854	8.9e-05	-6.02873e-05	5.29246e-05	-0.000196419	-1.24592e-05	-1.67664e-05	0.000173	-0.000398811	-1.52606e-05	-7.03166e-06	-0.000157728	-2.76132e-05	-0.000204625	3.61826e-05
	-75	-8e-06	-6.79655e-05	4.92434e-05	3.16278e-05	0.0001308	6.34359e-05	2.35541e-05	-0.00013535	0.000438106	-5.62983e-05	0.000113377	0.00016	-5.30479e-05	1.48905e-05	-0.000223335	-3.73623e-06	-3.55005e-05	0.000124	-0.000259799	-4.18217e-05	-1.57378e-05	-0.000148261	1.27784e-05	-4.47479e-05	1.62316e-05
	-74	0.000164	9.53655e-06	4.20997e-05	3.90407e-05	0.000122224	0.000233996	2.59039e-05	-0.00011426	0.000470547	-1.73519e-05	9.46545e-05	0.00018	-7.93933e-05	1.97089e-06	-0.000232759	-2.40974e-05	-4.0854e-05	7.2e-05	-0.000275199	-6.21234e-05	-1.32009e-05	-0.000112832	6.90509e-05	-7.55664e-05	-5.41475e-05
	-73	0.000179	0.0002319	-3.65424e-05	1.75923e-05	9.11132e-05	0.000347329	3.68859e-05	-0.000314135	0.000210977	-4.55193e-05	0.000482738	0.000122	-3.96897e-05	-2.68591e-06	-0.000232649	-2.12974e-05	-2.85494e-05	0.000372	-0.000170814	-6.3743e-05	-1.68089e-05	-0.000498537	8.02912e-05	-0.000137048	-7.50056e-05
	-72	0.000189	-2.26236e-05	4.16365e-05	-5.63231e-06	0.000111346	0.000481746	2.67851e-05	-0.000253368	0.000233654	-6.51786e-05	0.00111624	0.000123	-2.11521e-05	-3.03081e-05	-0.000198614	-2.38197e-05	-4.57744e-06	0.000725	-0.000161817	-2.62375e-05	-9.92974e-06	-0.00127778	0.000174037	-0.000124384	-7.27902e-05
	-71	5.5e-05	-0.000173647	2.58331e-05	-6.33632e-06	5.1592e-05	0.000303948	3.21794e-05	-0.000251724	-0.000194442	-6.39824e-05	0.00122237	9.5e-05	9.54848e-06	-1.72285e-05	-8.75733e-05	-2.65076e-06	-5.58377e-05	0.000773	6.66145e-05	-3.76154e-07	-1.25033e-05	-0.00129459	0.000381082	-5.69098e-05	-0.000466677
	-70	3.4e-05	-0.000102883	0.000101702	7.98316e-07	1.17407e-05	0.000194957	2.68912e-05	-1.17109e-05	-0.000205454	-2.43816e-05	0.000755215	5.7e-05	1.07377e-05	-3.49193e-06	-0.000266324	-3.66792e-06	-6.18353e-05	0.000408	4.64872e-05	5.22571e-06	-4.70745e-05	-0.000848562	0.000364607	4.51838e-06	-0.000407428
	-69	1.3e-05	7.66256e-05	-0.00018734	2.87175e-05	1.3002e-05	7.13941e-05	3.73153e-05	-8.8423e-06	-0.000176839	-8.38943e-05	0.000203901	-6e-06	3.19104e-05	-3.90842e-05	-0.000202774	-2.23971e-06	-9.46987e-05	5.4e-05	4.08322e-05	-3.61972e-05	-0.000127407	-0.000212286	0.000762341	-4.82476e-06	-0.000313839
	-68	2e-06	-6.15688e-05	-0.000172396	-3.37451e-05	-2.35095e-05	8.17274e-06	3.20599e-05	-1.51175e-05	0.000248495	-8.38636e-05	0.000174015	-7e-06	9.77413e-05	1.65565e-05	0.000124766	-4.07265e-06	-4.59989e-05	0.000105	-0.000229975	-3.96081e-05	-0.000136817	-0.000130946	0.00050455	-6.3803e-05	0.000241968
	-67	-1.1e-05	-0.000174036	0.000367949	-4.56601e-05	0.000140834	-0.000106795	2.63116e-05	-0.000311453	0.000449093	-8.34717e-05	0.000137013	9e-05	0.000116163	2.01867e-05	0.000292209	-3.45865e-06	-4.29259e-05	5.2e-05	-0.000229043	-3.69561e-05	-0.000102581	6.24726e-05	0.000497776	-4.12303e-05	0.000281287
	-66	-7e-06	-8.6907e-05	0.00055012	-7.88994e-05	6.26389e-05	-0.000107995	2.54515e-06	-0.000640599	0.000594841	-4.86673e-05	2.44713e-05	0.001141	2.36466e-05	-4.04399e-05	0.000266022	-3.10775e-07	-1.01014e-05	3.7e-05	-0.000235075	-1.52428e-06	-2.10726e-05	0.000258153	-5.74182e-05	-7.95415e-06	0.000185442
	-65	8e-06	-0.000517753	0.000551417	-1.15215e-05	0.000136902	-2.09095e-05	-6.1089e-06	-0.00147017	0.00115334	-5.46792e-05	-8.15211e-05	0.001934	-9.65677e-05	-9.10382e-05	-0.000103031	-3.78742e-06	1.22793e-05	-6.3e-05	-0.000361802	-4.18204e-06	-2.66362e-06	0.000317367	-4.34747e-05	0.000923299	0.000135717
	-64	3.3e-05	-0.000373843	4.40602e-06	1.681e-05	6.98579e-06	3.26422e-05	-5.10763e-06	-0.00165797	0.000875085	-5.4907e-05	3.61126e-05	0.003514	-0.000133883	-7.10009e-05	-0.000198011	4.59888e-06	1.78836e-05	2.5e-05	-0.000352355	-1.00972e-05	1.66728e-06	0.000138517	-4.76405e-05	0.00091269	5.48332e-05
	-63	5.6e-05	-0.000483127	-3.09955e-06	-1.78277e-05	9.21307e-05	0.000154071	-2.64805e-06	-0.00200595	0.000766643	-1.15607e-05	4.33279e-05	0.003298	-0.000122495	5.8894e-05	-0.000169749	-1.39995e-06	3.46983e-05	7e-06	-0.000396056	7.60828e-06	-1.63486e-06	8.77214e-05	-4.12914e-05	0.000723382	6.85733e-05
	-62	8.2e-05	5.43938e-05	-4.81424e-06	-2.08113e-05	4.89232e-05	0.000120819	7.39892e-06	-0.00122515	0.000133789	-5.54405e-06	0.000202938	0.002639	-6.86149e-05	2.48952e-05	-8.23681e-05	1.18426e-05	1.79609e-05	1.4e-05	-1.26306e-05	9.45741e-06	-1.96256e-06	-0.000138036	-5.35918e-05	-0.00023616	-3.31343e-05
	-61	9.3e-05	1.18247e-06	-2.32173e-05	-4.22384e-05	3.21452e-05	0.000124692	-4.81061e-06	-0.000927285	0.000201217	7.71627e-06	0.000486316	0.001169	-6.60885e-05	-4.35617e-07	3.93386e-05	2.00002e-06	7.58998e-06	0.000181	6.33109e-05	1.42323e-05	1.58268e-06	-0.000224721	-9.11788e-05	-0.000288504	-4.94943e-05
	-60	7.9e-05	2.53997e-05	-2.17642e-05	5.2348e-05	6.10735e-06	-1.08694e-05	-1.85487e-05	-0.000271044	9.84389e-05	7.51201e-06	0.000647028	0.000478	-9.10218e-05	0.00018199	0.000153151	6.19083e-06	-6.22079e-05	0.000254	3.89178e-05	-6.33289e-06	4.48698e-06	-0.000282172	-0.000100667	-0.000141437	7.09223e-05
	-59	1.7e-05	5.55626e-05	0.000852585	6.0712e-05	7.12158e-06	-2.53595e-06	-3.12723e-05	-0.000234575	-3.81732e-05	1.1845e-06	0.000506945	0.000368	-9.63392e-05	0.000215582	7.88875e-05	1.86606e-05	-6.11157e-05	0.000249	-1.14942e-05	-7.03377e-06	4.81101e-06	-0.000174052	-0.000156917	-4.91538e-05	0.000445185
	-58	4e-06	-1.28236e-05	0.00201698	6.23387e-05	2.29547e-05	7.69592e-05	-2.46148e-05	-7.43626e-05	-3.24591e-05	4.13399e-06	0.000136548	0.000163	-7.95473e-05	0.000225905	0.00010939	1.45247e-05	-5.7774e-05	4.1e-05	-8.30239e-05	-6.02865e-06	4.56899e-06	-0.000154382	-0.000237573	-8.9959e-06	0.000404724
	-57	-9e-05	-0.000130161	0.00259234	1.26822e-05	4.94776e-05	0.00061453	-3.69654e-05	-4.12314e-05	-5.5884e-05	0.000138755	0.000115124	1.9e-05	-7.64951e-06	3.84473e-05	0.000183257	1.85688e-05	-4.66641e-06	9.5e-05	-1.12194e-05	-4.5103e-06	4.2621e-05	-0.00020377	-0.000198908	0.000258781	0.0004453
	-56	-9.6e-05	-8.12141e-05	0.00216778	2.69402e-06	8.6959e-05	0.000602019	-8.60293e-05	-0.000144368	-8.07142e-05	0.000196232	0.000135739	0.000155	-9.36903e-06	0.000151089	0.000710046	-1.37576e-06	-1.67176e-05	9.5e-05	-3.46874e-06	2.3834e-06	0.000126185	-0.000250572	-0.000131513	0.000315407	0.000175611
	-55	-8.6e-05	-9.63347e-05	0.0016187	3.49993e-05	7.20328e-05	0.000353871	-9.72347e-05	-0.000118753	-6.41944e-05	0.000173356	0.00035796	0.000163	-1.26447e-05	0.000161347	0.0007354	5.48823e-06	-7.04387e-05	0.000251	1.18581e-05	1.37978e-06	0.000120623	-5.415e-05	-6.93899e-05	0.000328695	0.000227083
	-54	3.8e-05	1.77201e-05	0.00125351	3.06038e-05	3.83579e-05	-0.000175405	-7.04397e-05	-0.000113425	0.00010551	4.17593e-05	0.000233678	0.000186	-8.5973e-06	0.000180657	0.000589822	2.37207e-06	-8.10627e-05	0.000151	1.21909e-05	-3.44599e-05	7.60646e-05	4.75993e-05	-0.000115286	7.30352e-05	6.13681e-05
	-53	3.9e-05	-6.78716e-05	0.00147095	2.9071e-05	-1.37946e-05	-0.00016761	3.32142e-06	1.00323e-05	0.000117807	1.68463e-05	0.000121539	1.6e-05	-3.1823e-06	6.48068e-05	0.00010037	4.50503e-06	-8.60172e-05	0.000116	-6.44103e-07	-1.08389e-05	1.52942e-06	-6.25056e-05	-0.000177875	6.20093e-05	2.94324e-05
	-52	4.3e-05	-9.38916e-05	0.00112018	-2.95213e-06	-1.49865e-05	5.74841e-05	7.98227e-05	9.47992e-06	0.000203475	-5.28982e-06	0.000457291	1.2e-05	2.40845e-05	7.87052e-05	4.65589e-05	4.8801e-06	-3.55759e-05	0.000481	-5.68059e-05	-9.69431e-06	-3.62865e-06	-0.000587871	-0.000110489	3.52725e-05	1.94059e-05
	-51	-3.8e-05	-8.76442e-05	0.000909528	3.33603e-05	-1.20053e-05	6.4075e-05	8.15816e-05	3.3967e-06	0.000106674	2.60021e-06	0.000878153	4e-06	-0.000136136	5.53042e-05	-3.82899e-05	3.01938e-05	-6.53042e-05	0.000739	-5.07366e-05	3.04266e-05	1.96318e-06	-0.00098351	-9.71084e-06	3.19417e-05	0.000133667
	-50	-3.8e-05	-4.69285e-05	0.000248043	3.87609e-05	-1.60265e-05	0.000588702	6.55271e-05	-3.29875e-05	0.000107023	-2.18972e-05	0.00121715	-2.7e-05	-0.000142131	5.59964e-05	-0.00033862	3.5703e-05	-4.77282e-05	0.001071	-3.13763e-05	-5.66378e-06	-6.31633e-07	-0.00103096	0.000213653	-1.61511e-05	0.000241858
	-49	-6.1e-05	4.80861e-05	-1.57084e-05	8.93903e-05	1.54008e-05	0.00116497	5.91506e-06	-0.000617512	-4.10132e-05	-1.29575e-05	0.000904453	0.000287	-0.000170952	-2.3862e-05	-0.000519752	3.40773e-05	-8.20045e-05	0.000743	7.66643e-05	-6.56342e-06	-4.77025e-06	-0.000894415	0.000217766	2.55832e-05	0.000198815
	-48	-5e-05	4.59684e-05	3.11966e-06	5.96306e-05	3.47394e-05	0.00122331	-1.74197e-05	-0.000617288	-5.61319e-05	-4.2559e-05	0.00055403	0.000307	-7.21339e-05	-4.29984e-05	-0.000519303	6.18352e-06	-3.97097e-05	0.00053	6.89997e-05	1.36159e-05	-2.79262e-05	-0.000484901	0.000218089	0.000126924	7.7202e-05
	-47	-1.8e-05	8.95465e-07	-8.24393e-06	5.61432e-05	7.35274e-05	0.00111297	-1.8992e-05	-0.00058313	-5.82306e-05	-9.19218e-05	0.00029792	0.000349	-7.00665e-05	-0.000182008	-0.000338147	-2.39842e-06	-3.66842e-05	0.00023	7.73866e-05	1.85219e-05	-5.5706e-05	-0.000306288	0.000160768	0.000193349	-0.000143293
	-46	-2e-05	-0.000150974	0.00018103	-3.06177e-06	0.000122133	0.000466114	-0.000105629	9.53624e-05	-8.37829e-06	-6.97032e-05	0.000347506	3.6e-05	-9.83072e-05	-0.000385096	-0.000157984	-1.8671e-06	-1.08824e-07	0.000199	1.08711e-05	1.80907e-05	9.20088e-05	-2.84385e-05	0.000152598	0.000442639	-0.000213028
	-45	8.1e-05	-9.10982e-05	0.000161277	-1.18267e-05	7.29834e-05	0.000681364	-0.000466525	0.000143938	-8.616e-06	0.000129191	0.000303987	-8.8e-05	-9.5771e-05	-0.000130901	-0.000381669	1.727e-05	-7.02244e-06	0.000154	0.000290067	-1.50846e-06	0.000286787	-2.86655e-05	7.68062e-05	0.000312273	2.84476e-05
	-44	0.000106	-4.95291e-05	0.000311764	1.0666e-05	-2.17182e-05	0.000286701	-0.000537469	0.000104577	-9.02409e-06	0.00010819	0.000453422	-0.000111	-0.000166	3.137e-05	-0.000239032	3.73169e-05	4.45913e-05	0.000452	0.000279135	-3.23644e-06	0.000220744	-7.75623e-05	-2.40798e-05	0.00023286	0.000329174
	-43	0.000158	1.07007e-05	0.000139046	1.87432e-05	-7.12308e-05	0.000308447	-0.000518934	-8.71342e-05	2.40697e-05	0.000201223	0.00146449	-0.00012	-0.000170562	0.000292276	-4.01603e-05	4.21983e-05	6.98392e-05	0.001329	0.000275147	-3.66269e-07	0.000143139	-0.00115668	-1.62258e-05	-5.47559e-05	0.000480356
	-42	9e-05	-4.79864e-05	0.000141544	-0.000150887	-3.58289e-05	-0.000430726	-0.000247406	-0.00185524	1.51741e-05	0.000214137	0.00213181	0.002841	-0.000116366	-6.75183e-05	0.00164131	2.46856e-05	0.000344582	0.001722	-5.64224e-05	6.32824e-05	0.000114237	-0.00166846	-7.07116e-06	-2.60581e-05	0.000182307
	-41	3.4e-05	-2.56594e-05	7.30462e-06	-0.00028473	5.42139e-05	-0.000616679	-0.00021058	-0.00193889	1.97381e-05	0.000256305	0.00274481	0.002953	-0.000141847	-7.48692e-05	0.00178896	4.29244e-06	0.000174614	0.002044	-5.21498e-05	9.40942e-05	0.000189292	-0.00222081	1.31176e-06	-4.59506e-05	0.000132977
	-40	5.7e-05	5.98106e-05	5.39321e-05	-0.000284185	3.18656e-05	-0.000649549	-0.000157265	-0.00186653	-1.01793e-05	0.000189677	0.00129468	0.002947	-0.000114179	-9.10673e-05	0.00158186	4.4401e-07	0.000145141	0.000703	-2.33522e-05	9.08676e-05	0.000134283	-0.0013219	-8.05624e-05	-3.40683e-05	9.65911e-05
	-39	0.000134	3.56357e-05	1.87493e-06	-0.000116401	8.97484e-05	-5.04082e-05	-0.000112718	-0.000475076	-9.14404e-05	0.00012098	0.000782504	0.000685	-0.000121739	0.000154512	0.000136997	-1.18795e-05	-0.000124394	0.000449	5.12659e-05	1.88253e-05	6.84514e-05	-0.00106158	-6.71832e-05	-1.99911e-05	0.000422451
	-38	8e-05	5.45306e-05	0.000460212	-3.2362e-06	7.41665e-05	0.000108424	-8.04369e-05	-0.000952389	-0.00012893	0.000147432	-3.74659e-05	0.002501	-2.18569e-05	0.000425127	-4.89053e-05	-1.26818e-05	-1.513e-05	-0.000213	-8.6464e-05	-8.64061e-06	7.1638e-05	-0.000464369	-0.000107465	-6.21766e-05	0.000585579
	-37	1.8e-05	0.00048337	0.00232031	0.000336244	7.49959e-05	0.000130004	-0.00163471	-0.00089907	7.56461e-06	0.00130957	0.000129123	0.002525	-0.000166214	0.000426295	-7.49267e-05	-1.48506e-05	-0.000513534	0.000122	-0.000137166	-3.12246e-05	0.00144424	-0.00031097	-0.000754041	-0.000173466	0.000736778
	-36	-5.7e-05	0.000647834	0.00337314	0.00197825	1.86006e-05	0.000225001	-0.00158707	-0.000534525	0.000389902	0.00118631	-5.4465e-05	0.001849	-0.000281252	-0.000182516	8.03847e-06	-5.33406e-06	-0.00236162	-3.8e-05	-0.000458033	-0.000177583	0.00143267	-8.05838e-05	-0.00180825	-0.00019214	5.57994e-05
	-35	-0.000834	0.000636855	0.0027028	-0.000131139	5.01636e-05	0.000575449	-0.00160456	0.000403623	0.000336894	0.00118158	3.06139e-05	-0.000238	-0.00123561	-0.000366297	7.00014e-05	-5.37005e-06	-0.00465223	3e-05	4.25268e-05	0.000588679	0.00138174	-0.00022738	-0.00231935	-0.000121355	-0.000137424
	-34	-0.000806	0.000338824	0.00104578	0.000582969	1.75812e-05	0.00100694	-3.68656e-05	0.00109134	0.000203481	-8.82418e-06	3.5301e-05	-0.000546	-0.00170954	-0.000544511	0.000161719	3.63031e-06	-0.00515397	4e-06	3.69277e-05	0.000549952	5.18068e-06	-0.000196705	-0.0018172	-9.91784e-05	-0.000357598
	-33	-0.000541	0.000198592	6.96021e-05	0.000308071	9.07365e-06	0.000648534	-2.76461e-05	0.00145788	-8.79158e-05	-3.17819e-05	3.53691e-05	-0.00075	-0.00248145	-7.47688e-05	-8.10627e-05	4.86559e-06	-0.0051717	5e-05	0.000325201	0.000559625	-6.24928e-05	-0.000184439	-0.000891637	-7.61225e-05	5.25148e-05
	-32	0.000766	0.000177226	0.000388388	0.00352801	-2.38278e-05	0.00036166	-0.000132856	0.00131085	2.43884e-05	5.19518e-06	0.000171526	-0.000703	-0.00258585	-7.30652e-05	-0.000104896	5.88966e-06	-0.00382982	0.000146	-9.66246e-05	-0.00025356	9.80476e-05	-0.000100575	-0.000443468	-5.41311e-05	-2.56255e-05
	-31	0.000798	-0.000127159	0.000266913	0.00249161	0.000145656	0.000173317	-0.00013244	0.00185171	0.000184585	1.17029e-05	0.000125931	-0.000981	-0.0026351	0.000103912	-0.00019038	-9.7225e-06	-0.00274288	0.000127	-0.000275555	-0.000220351	9.81062e-05	-0.00011941	-0.000498303	8.04508e-05	3.91748e-05
	-30	0.000403	-2.74025e-05	0.000254218	0.00103145	0.000199953	0.000993634	-0.000113881	0.00182769	0.000223881	-2.79047e-05	0.000126713	-0.000887	-0.00215017	0.000103453	-0.000141734	-1.37249e-05	-0.000632167	0.000103	-0.00019473	-4.08876e-05	6.49402e-05	-0.000111969	-0.00042138	4.21016e-05	4.27711e-05
	-29	-6.6e-05	6.59107e-05	0.000120451	-0.000119451	0.00021238	0.00119469	3.80166e-06	0.00170295	0.00019655	-7.73176e-05	-1.93007e-05	-0.000779	-0.00121879	3.16052e-05	-0.000220698	-1.32043e-05	0.000299688	-1.7e-05	-3.70115e-05	2.10156e-05	-7.98537e-05	-7.43612e-05	-0.000290557	2.71206e-05	7.35364e-06
	-28	-0.000134	0.000244268	-5.05206e-06	-0.000115466	0.000104759	0.00115354	3.56341e-06	0.000655892	7.33699e-05	-7.59696e-05	0.000297881	-0.00023	-0.000570386	3.55556e-05	-0.000190949	-1.25842e-05	0.000208146	0.000254	0.000173441	4.91429e-05	-7.98543e-05	-0.000321967	-1.35823e-05	-1.85564e-05	0.000108347
	-27	1e-05	0.000147164	-4.1885e-05	-1.93844e-05	8.79517e-05	0.000462889	-5.20614e-05	0.00182211	1.55222e-05	1.51031e-05	0.000349181	-0.000484	-0.000221128	0.000133765	-7.94293e-05	-8.0808e-06	-4.08281e-05	0.000335	0.000110509	1.71442e-05	-2.66436e-05	-0.000318689	0.00013071	-4.28677e-05	0.000170587
	-26	9.4e-05	5.03769e-05	-4.34793e-05	1.34647e-05	9.67952e-05	0.000266298	-8.2242e-05	0.00237578	0.000141803	5.46193e-05	0.000310679	-0.000901	-0.00014502	-5.58869e-05	9.12434e-06	-1.21365e-05	-5.06691e-05	0.000294	2.16055e-05	6.0406e-06	5.25057e-05	-0.000176695	7.05061e-05	-4.33816e-05	5.24638e-05
	-25	2.5e-05	-3.46457e-06	-4.35936e-05	2.8043e-06	0.000168368	7.18501e-05	-8.27245e-05	0.00246343	6.18902e-05	4.90043e-05	-4.16168e-05	-0.001017	-9.90492e-05	-6.07595e-05	0.000148625	-1.56125e-05	-3.94519e-05	-0.000199	5.49547e-05	-2.39908e-05	5.10682e-05	0.000139471	5.82729e-05	-0.000168923	-4.46221e-05
	-24	6.1e-05	-7.03177e-06	1.37375e-06	1.17849e-05	0.000199157	7.26217e-05	-1.63249e-06	0.00150249	4.71896e-05	2.22586e-05	-3.82296e-05	-0.000758	-1.43416e-05	-0.000163528	0.000152162	-2.22704e-05	-6.01654e-05	-0.000229	0.000150301	-3.53723e-05	4.30761e-05	9.70882e-05	-1.36876e-05	-0.000129675	-0.000110498
	-23	-0.000107	-9.77468e-06	5.50292e-06	1.2677e-05	0.000152278	-5.43264e-05	6.30246e-05	0.00107657	-7.29165e-05	-5.05151e-06	-0.000325695	-0.000434	0.000144701	-8.47623e-06	0.000362153	-1.80281e-05	-2.42683e-05	-0.000568	5.99787e-05	-4.43653e-05	-2.93855e-05	-0.000368093	2.23955e-05	-0.000134767	2.74764e-05
	-22	-3.8e-05	0.000182752	-0.00025897	-5.94914e-06	3.79896e-05	-6.42628e-05	5.78637e-05	0.000822641	3.97675e-05	-1.99437e-05	0.00127511	-0.000338	8.85285e-05	-6.79158e-06	0.000208787	-1.24849e-05	-3.85981e-06	0.000335	1.70415e-05	-7.79019e-06	-2.58002e-05	-0.0013294	0.000157515	-8.88692e-05	9.09296e-05
	-21	-3.4e-05	0.000226626	-0.000366829	-3.73586e-05	4.98234e-05	-4.04876e-05	1.40768e-05	0.000225666	8.95077e-05	1.38831e-06	0.00203098	-0.000141	9.85139e-05	4.81437e-06	0.000169368	-1.489e-05	-7.38979e-05	0.000875	-9.69362e-05	3.02597e-05	-3.31943e-05	-0.00171968	0.000191988	-0.000208888	8.49903e-05
	-20	-0.000191	0.000419298	-0.000301219	-1.54333e-05	7.34081e-05	9.07104e-05	-0.000173783	5.74599e-05	9.67428e-05	1.49516e-05	0.00352101	-1e-05	0.000161224	0.000106437	-5.30267e-05	-6.14277e-06	-9.62011e-05	0.0021	-6.89533e-05	2.74296e-05	4.55146e-05	-0.00211169	8.73934e-05	-0.00020302	0.000339911
	-19	-0.000498	0.000164414	-0.000115758	9.10125e-05	0.000137071	0.000228506	-0.000413579	2.72992e-05	2.42707e-05	0.00025489	0.00203718	6.2e-05	0.000487262	0.000106299	-7.14331e-05	-1.02831e-06	-1.39039e-05	0.001525	1.86209e-06	2.22624e-05	0.000300015	-0.00125552	0.000187896	-9.80738e-05	0.000311711
	-18	-0.000499	8.09224e-05	0.000133914	3.58307e-05	4.78299e-05	0.000246504	-0.000767498	5.19014e-05	5.63227e-06	0.000623678	0.00195102	2.9e-05	0.000454006	-2.19494e-05	-3.00248e-05	1.48135e-05	0.000190672	0.001801	1.80061e-05	1.23127e-05	0.000699184	-0.000295507	0.000166327	0.000169135	0.000311039
	-17	-0.000169	-0.000119309	-0.000179182	6.79006e-06	5.01769e-05	0.000172534	-0.00214549	-7.50223e-05	-0.000136218	0.00158848	0.000509888	9e-06	7.24417e-06	-0.000127102	-7.06942e-05	1.16509e-06	0.000250162	0.000616	0.000116602	4.27967e-05	0.00163665	0.000665246	0.00105782	0.000158886	3.10346e-05
	-16	7.7e-05	0.000212882	7.01382e-06	-0.000261676	6.81768e-06	4.05323e-05	-0.00364327	-8.9236e-05	-0.000209086	0.00230083	0.000104088	-2.1e-05	-0.000280179	-0.000113244	-3.13236e-05	2.38069e-05	0.000345121	-0.000264	-0.000188361	0.000122707	0.0027016	0.00100544	0.000742199	5.74954e-05	8.64217e-05
	-15	2.2e-05	0.000234236	-7.02766e-05	-3.21051e-05	1.34875e-05	6.62145e-06	-0.0033303	-0.00014871	-0.000208483	0.00198625	-0.000749784	1.8e-05	-6.39635e-05	8.96579e-05	-5.2241e-05	3.65958e-05	4.61434e-05	-0.001521	-0.000309651	6.74343e-06	0.00230367	0.0005059	0.000631189	-8.86245e-05	0.000229266
	-14	-0.000207	0.000570701	0.00164081	-5.58335e-05	1.7757e-05	4.59321e-05	-0.00431578	-5.12744e-05	0.000558438	0.00214265	-0.000787511	0.000109	-1.27131e-05	0.000128281	4.60731e-06	4.81834e-05	-1.90665e-05	-0.001844	-0.000693938	4.12153e-05	0.00367694	0.000601759	-0.000684569	-0.000104572	0.000295466
	-13	-9.7e-05	0.00113006	0.00290009	0.00121947	1.87954e-05	-5.77746e-06	-0.00587899	-5.07063e-05	0.00109528	0.00310308	-0.000486523	0.000114	-0.000130655	0.000623802	1.42082e-05	3.9285e-05	-0.00188607	-0.001129	-0.000968141	-0.000131455	0.00550015	0.000281277	-0.00157236	-0.000109411	0.00097161
	-12	9e-06	0.00103475	0.00304737	0.00257525	2.96502e-05	1.37112e-05	-0.00665701	-0.000104131	0.00108583	0.00359917	-0.000424879	0.000136	-0.00114499	0.000809361	1.8475e-05	1.80184e-05	-0.00340156	-0.000869	-0.000847775	-0.000175985	0.00621143	0.00024932	-0.00127027	8.05101e-06	0.00126407
	-11	0.000327	0.000695172	0.00148707	0.00296415	0.000129296	-1.57877e-05	-0.00646051	-0.000117288	0.00102809	0.00361595	-7.06906e-05	0.000101	-0.0019601	0.000329886	-2.96683e-05	1.11475e-05	-0.00378327	-0.0002	-0.000570995	-0.000274683	0.00565033	-7.00142e-05	-0.000995687	3.14762e-05	0.000856518
	-10	0.00017	5.10947e-05	-0.000440206	0.0025909	0.00011261	0.00164772	-0.00508195	-0.000136482	0.000563077	0.00225113	6.75883e-05	4e-05	-0.00195876	0.000131492	-0.000361613	9.46276e-05	-0.00315236	-7.1e-05	-6.6634e-05	-0.000371256	0.00351898	-5.21848e-05	0.000347198	0.000109759	0.000380968
	-9	3.1e-05	0.000348759	0.00162235	0.00160177	-0.000123009	0.00365551	-0.00417408	-4.23262e-05	0.00198907	0.0015346	0.000335435	-1.3e-05	-0.00137911	0.000281602	-0.000512967	0.000213085	-0.00210135	0.000285	-0.000646767	-0.000272559	0.00274998	-0.000169704	0.00113365	-3.56585e-05	0.000591645
	-8	2e-05	0.000409342	0.000756273	0.00276349	-0.000220989	0.00393562	-0.00184676	-5.05894e-05	0.00145146	0.000367736	0.000279335	-9.9e-05	-0.000691721	0.000728187	-0.00057976	0.000218623	-0.00364972	0.000334	-0.00057523	-0.000266833	0.000955708	-0.000137674	0.0027781	-5.29753e-05	0.000949346
	-7	0.000296	0.000291345	0.00131132	0.00205551	-0.000229034	0.00231946	0.000299166	-0.000158367	0.0015008	-0.000861313	0.000217271	-1.8e-05	-0.00149232	0.000397291	-0.000291639	0.000124329	-0.00259274	0.000336	-0.000504797	-8.59198e-05	-0.000237268	-0.000172872	0.00241191	-8.04959e-05	0.000641333
	-6	0.000484	0.000181476	-0.00103401	0.00135663	9.658e-06	2.76899e-05	0.000284137	-0.000162143	0.000110162	-0.000812325	9.23843e-05	-2.1e-05	-0.00110137	-1.94555e-05	-0.000426737	8.77434e-06	-0.00182308	0.000243	6.25531e-05	0.00011479	-0.000183081	-0.000113301	0.0014007	-8.70542e-05	1.80465e-06
	-5	0.000307	0.000153273	-5.11547e-05	-0.00018985	2.40829e-05	0.000709715	0.000359155	-0.000161224	3.7061e-05	-0.00122809	9.24014e-05	-9e-06	-0.000741212	-2.81804e-05	-0.000427349	9.26775e-06	0.000103317	0.000117	4.05351e-05	0.000251585	-0.000317428	-0.000119552	-1.05642e-05	-6.22286e-05	-3.26804e-05
	-4	-0.00037	1.97508e-05	3.65072e-05	-0.000213706	3.16316e-05	0.00102578	0.000156973	-0.000248934	-1.42204e-05	-0.00053178	7.64189e-05	-3e-06	0.000511908	-8.25208e-06	-0.000590823	4.68356e-06	8.44269e-05	6e-05	-1.64322e-05	0.000260502	-0.000137961	-7.6559e-05	-3.61523e-05	-2.03733e-05	-3.7957e-05
	-3	-0.000686	-8.42598e-05	0.000118176	-3.219e-05	1.9877e-05	0.00128203	0.000114796	-0.000238003	-4.96609e-05	-0.00061294	1.14827e-05	3e-05	0.000506625	1.9316e-05	-0.000236339	8.61822e-06	-2.71316e-05	-6e-05	-3.15604e-05	0.000119831	-0.000192483	1.93247e-05	-8.93538e-05	0.000165948	-4.54927e-05
	-2	-0.000794	-9.10166e-05	0.000338935	-4.12766e-05	1.33651e-05	0.000281534	-0.000100513	-0.000214895	-0.000294183	-0.000482429	1.40584e-05	6.1e-05	0.00050143	9.49026e-05	-0.000102627	-5.45947e-07	4.82583e-05	1.9e-05	1.27867e-05	9.05759e-05	-0.000169332	3.07626e-05	-0.000150555	0.000158398	5.86919e-06
	-1	-0.000304	1.44189e-05	0.000261896	-6.45844e-05	1.63627e-05	-5.90919e-05	-0.000196538	-9.02902e-06	-0.000291126	-0.000414196	1.33498e-05	3.8e-05	0.000151402	0.000118993	9.88048e-05	-5.69372e-06	6.56465e-05	1.5e-05	3.52659e-05	9.2024e-05	-5.36543e-05	3.96895e-05	-0.000123772	0.000145165	1.59126e-05
	0	-0.000332	4.38969e-05	0.000227114	-0.000124207	0.000129279	-5.28776e-05	-0.00022988	-1.0081e-05	-0.000308929	-0.000201914	0.000109976	3.1e-05	-3.45174e-05	9.34395e-05	5.05052e-05	-1.89033e-05	7.8855e-05	5.4e-05	6.42273e-05	0.000220471	1.44245e-06	5.83158e-06	-0.000133372	1.47884e-05	3.24366e-05
	1	-0.000314	5.84959e-05	-8.51348e-06	-0.000163491	0.000128682	-5.63702e-06	-9.12481e-05	2.27559e-05	-3.97196e-05	0.000103433	0.000212334	2.7e-05	-4.032e-05	-3.08193e-06	2.25147e-05	-1.51468e-05	4.39315e-05	0.000179	-2.30919e-05	0.00015378	0.000117998	4.70647e-05	-0.000103241	1.91585e-05	-3.86701e-05
	2	-0.000445	1.21723e-06	-1.19631e-05	-0.00018235	0.000197561	2.05735e-05	-1.43629e-05	0.000107333	-5.043e-05	2.9879e-05	0.000211639	2.6e-05	-7.02495e-05	-4.38551e-05	1.67988e-05	-1.18592e-05	5.78424e-05	0.000188	-5.41111e-05	0.000220377	1.93974e-06	4.47769e-05	-9.31754e-05	2.76261e-05	-0.000160471
	3	-0.000357	-1.51483e-05	-4.35334e-05	-0.000147689	9.86373e-05	-0.000205502	-1.99723e-05	0.000245418	-2.61718e-05	-5.49448e-06	0.00012398	-4.2e-05	-3.45812e-05	1.191e-06	7.26236e-05	-4.42982e-06	1.0546e-05	0.000155	-1.31238e-05	6.98061e-05	2.65084e-06	4.22544e-05	-7.28537e-07	9.38431e-06	4.04141e-05
	4	-0.000311	-4.55983e-05	-3.49382e-05	-0.000162539	0.000118863	-0.000223236	1.4646e-05	0.00024068	-3.57524e-06	9.3345e-06	2.37468e-05	-0.000121	3.6872e-05	2.96179e-05	0.000187052	-7.94391e-06	7.27215e-05	2.1e-05	3.39799e-05	9.50038e-05	1.12149e-05	-4.12505e-06	3.14572e-05	-8.98818e-06	7.25836e-05
	5	-0.00017	6.35547e-05	-3.63392e-05	-0.000140359	4.85345e-05	-0.000229722	3.34752e-05	0.000166656	-8.32661e-05	-8.76812e-05	-1.07496e-06	-0.000128	9.52672e-05	4.86534e-05	0.000181634	-2.84495e-06	4.31665e-05	-1.2e-05	6.60395e-05	2.59347e-05	-8.12601e-06	-6.89879e-06	-1.3207e-05	-4.60181e-05	0.000207638
	6	2.7e-05	0.000146986	0.00010946	-0.000110436	6.45687e-05	6.15772e-05	0.00012185	5.80112e-06	-6.12988e-05	-0.000210235	-2.23965e-05	-0.000116	8.59545e-05	1.93266e-06	0.000106888	-6.44981e-06	7.07884e-05	-4.5e-05	7.29641e-05	3.39941e-05	-0.000197923	-1.99847e-05	-8.79392e-05	1.3633e-05	-4.56718e-05
	7	-0.000123	0.000168537	0.000107767	1.77996e-05	5.40907e-05	6.24711e-05	8.49227e-05	-5.39929e-05	-9.6068e-05	-0.000197819	-0.000124537	-6.7e-05	0.000202135	-8.04597e-05	-1.11682e-05	-1.37458e-05	-2.82732e-06	-0.000139	7.16524e-05	4.34672e-06	-0.000202918	-3.66381e-05	-0.000112263	3.03592e-05	-8.99028e-05
	8	-0.000191	8.24769e-05	0.000107928	6.32446e-05	2.56209e-05	9.16699e-05	4.08042e-05	-4.70722e-05	-0.000409143	-5.19373e-05	-9.90071e-05	-6.1e-05	0.000191446	-0.000130523	-4.81881e-05	-1.55481e-05	-0.000101484	-0.000109	-0.000151349	-5.64627e-05	-0.00014926	-3.47561e-05	-7.88495e-05	9.8474e-05	-9.08453e-05
	9	-0.000427	-1.21052e-06	-2.14943e-06	3.10849e-05	-2.09075e-06	9.45128e-06	-2.78832e-05	8.93136e-05	-0.000424311	9.62348e-05	-0.00018011	-0.000288	0.000256777	-0.000116977	-2.71929e-05	-2.41472e-05	-0.00012039	-0.000109	-0.00019956	-1.29278e-05	4.21943e-05	0.000131045	-6.99273e-05	4.25571e-05	-4.76487e-05
	10	-0.000349	-7.71113e-05	-5.61745e-07	-1.03121e-06	9.91114e-06	1.79941e-05	-3.34243e-05	0.00012188	-0.000438328	2.38845e-05	-8.25555e-05	-0.00025	3.58169e-05	-6.94734e-06	-2.54692e-05	-1.51198e-05	-0.000122006	-6e-06	-0.00022029	-5.35491e-05	-2.11562e-06	0.000150403	-2.75869e-05	3.83128e-05	1.95186e-05
	11	-0.000252	-6.25591e-05	-3.45752e-06	-1.77666e-05	2.05918e-05	-8.28558e-05	-4.34736e-05	0.000118139	-3.07325e-05	-0.000130841	-0.000144208	-0.000133	-1.55928e-06	0.000117391	0.000104471	-1.37563e-05	-2.57467e-05	-9.3e-05	0.000354796	2.18751e-06	-5.51935e-05	0.000222937	-1.72874e-06	-2.05166e-06	1.88966e-05
	12	-4.9e-05	6.71385e-05	-3.59435e-06	1.59716e-05	6.22595e-05	-0.000141406	-0.000120752	-4.01201e-05	-0.000387951	-0.000118148	-6.378e-05	0.000196	-0.000125026	9.96187e-05	8.74119e-05	-1.74641e-06	-9.7487e-06	-7.7e-05	0.000833948	-4.87946e-05	2.013e-05	7.21167e-05	4.20127e-05	-6.15545e-05	5.88725e-07
	13	7.3e-05	0.000128289	-7.93375e-05	5.45062e-05	-0.000347955	-0.00022031	-0.00011365	-4.1267e-05	-0.000318627	-9.73382e-05	-6.48549e-05	0.000196	-9.71006e-05	7.37304e-05	7.5784e-05	2.53002e-05	-9.84782e-05	-9.2e-05	0.000875217	-1.96464e-05	4.48753e-05	3.80635e-05	0.000207229	-5.78845e-05	-2.98144e-05
	14	5.2e-05	0.000163347	-7.90613e-05	3.4726e-05	-0.000391377	-0.000167521	-7.50124e-05	-1.50593e-05	-0.000338181	1.57616e-05	4.97155e-06	-4.8e-05	-9.4032e-05	-7.96927e-06	-2.17935e-05	2.41491e-05	-6.58318e-05	-2.4e-05	0.000493043	-1.188e-05	6.64277e-05	-3.38617e-05	0.000180956	-4.53486e-05	-8.13626e-05
	15	-9.9e-05	5.26308e-05	-8.64824e-05	3.72828e-05	-0.000347676	-0.000108095	-2.21395e-06	3.66955e-05	-4.17328e-05	-8.15412e-06	2.58671e-05	-0.000122	-7.13219e-05	-4.17084e-06	-9.36886e-05	2.34241e-05	-8.18485e-05	-8e-06	-4.80667e-05	-8.91639e-06	-9.32244e-06	-3.18251e-05	0.000162729	3.96671e-05	-6.26616e-05
	16	-0.000115	5.21353e-05	-4.12754e-06	-8.65583e-07	3.10404e-05	-3.80342e-05	1.85701e-06	6.86778e-05	-7.32776e-05	2.42976e-06	0.000101621	-0.000167	-6.06426e-05	-9.71993e-05	-0.000128676	-2.46604e-06	9.88395e-06	8e-06	-9.64367e-05	1.49169e-06	2.12595e-06	-4.93857e-05	-1.72278e-05	0.000149782	-5.33942e-05
	17	-0.000277	1.7533e-06	3.3707e-05	-6.1114e-06	0.000132935	-9.25688e-06	1.41636e-06	0.000187815	-4.01155e-05	6.51285e-07	8.84145e-05	-6.3e-05	-6.17624e-05	-7.18599e-05	-0.000159579	-3.17755e-06	-1.89334e-05	2e-05	-0.000244363	3.27008e-05	2.67016e-06	1.65365e-05	-5.00448e-05	0.000138247	1.5893e-06
	18	-0.000114	-8.43744e-05	8.00322e-05	-2.68336e-05	4.64181e-05	1.24339e-05	-5.20231e-05	0.00019754	1.20232e-05	5.35051e-05	6.85202e-05	-5.9e-05	-0.00019336	-9.17524e-05	-8.18388e-05	-6.50704e-07	1.38233e-05	3e-06	-0.000105048	3.39643e-05	3.33175e-05	1.30956e-05	-3.98962e-05	0.000249944	9.20282e-06
	19	-0.000125	1.47638e-05	7.83536e-05	2.41104e-05	6.3273e-05	7.10477e-05	-5.80951e-05	0.000160755	6.13099e-05	6.97765e-05	-4.36109e-06	-3.7e-05	-0.000180124	-1.53222e-05	-5.8696e-05	-4.84969e-07	-4.069e-05	-3e-06	-6.68023e-05	3.02012e-05	4.14934e-05	6.19367e-05	-8.1624e-05	0.000140001	1.05476e-05
	20	4e-06	2.42622e-05	4.92035e-05	-1.84896e-05	4.27522e-05	4.38939e-05	-5.84365e-05	-5.79771e-05	4.69187e-05	6.93706e-05	4.67142e-07	7e-06	-9.01359e-05	-5.43379e-05	-5.62356e-05	1.84693e-06	-3.95505e-05	1.4e-05	6.69971e-05	3.63976e-05	3.07271e-05	-3.97207e-06	-4.89831e-05	7.60315e-05	7.98065e-06
	21	-6.2e-05	0.000244593	-4.81311e-06	-1.43596e-05	7.33027e-05	-1.46701e-05	-5.51192e-06	-0.00010501	-1.38005e-05	1.16812e-05	4.19929e-05	2.9e-05	6.06014e-05	-5.11289e-05	-7.96933e-05	1.84527e-06	-5.08322e-05	4.3e-05	-1.86796e-05	4.43954e-05	-2.04038e-06	-4.74241e-05	8.84202e-05	-9.28097e-05	-8.23643e-05
	22	-3.7e-05	0.000228916	-6.38881e-05	-0.00012947	4.6538e-05	-8.48012e-05	-1.47234e-05	-9.96046e-05	-5.23802e-06	3.78194e-05	4.20954e-05	4.3e-05	4.8322e-05	-4.01889e-05	-6.04534e-05	1.62977e-06	-0.000105349	3.8e-05	-3.47012e-05	0.000103852	1.13789e-05	-4.5092e-05	0.000137981	-0.000155292	-0.00012769
	23	8e-06	0.00024751	-7.10025e-05	-0.000136846	2.64625e-05	-6.1163e-05	-8.71454e-06	-3.19593e-05	-1.71942e-05	3.38701e-05	6.41256e-05	3.7e-05	-5.66968e-05	-2.52531e-05	-2.35692e-05	-2.33383e-06	-0.000142604	7.1e-05	-2.1796e-05	9.16869e-05	-8.19207e-07	-9.9276e-05	0.000142176	-9.20405e-05	-0.000146101
	24	-0.00032	0.000244745	-0.00014168	-0.000137312	-0.00103378	-1.35854e-05	2.796e-05	-4.50225e-05	-6.39408e-05	2.47529e-05	7.97775e-05	6e-06	0.000226375	-1.18831e-05	1.7618e-06	7.1774e-05	-0.000145288	5.3e-05	8.62722e-05	7.99969e-05	-3.53186e-06	-6.57052e-05	-6.49368e-05	-8.61322e-05	-0.000101276
	25	-0.000317	0.000172507	-7.02325e-05	-0.000199436	-0.00107582	-2.39251e-06	3.09698e-05	-9.21455e-05	-8.32516e-05	-7.55395e-06	7.77416e-05	5.2e-05	0.000109381	-7.37013e-06	2.60925e-06	9.22057e-05	-7.06672e-05	4.9e-05	0.000156874	4.08854e-05	-2.90608e-05	-6.64613e-05	-0.00011578	-7.12999e-05	3.14139e-05
	26	-0.0004	0.000144128	6.47553e-05	-0.000122223	-0.00103855	4.19981e-05	1.14275e-05	-0.000174047	-9.29094e-05	4.25854e-05	4.41588e-05	-5e-06	2.29053e-05	1.67223e-05	-1.32083e-05	9.54396e-05	-3.79194e-05	-1e-06	0.000238567	1.26974e-05	6.62842e-06	-3.39798e-05	-0.000136936	-0.000104543	0.000118288
	27	-0.000115	7.05045e-05	8.72193e-05	-6.64605e-05	-1.23961e-05	8.10928e-05	-0.000144689	-0.000111539	5.055e-05	0.000131009	-1.17927e-05	5e-06	-0.000282543	0.000105674	-0.000225117	2.91589e-05	-8.24845e-05	-1.1e-05	0.000137315	1.50165e-05	9.30066e-05	-3.22146e-05	-7.48844e-05	-8.67879e-05	0.000225043
	28	2.9e-05	0.00011794	0.00013439	6.40493e-05	8.53978e-05	7.98417e-05	-0.000127878	-3.52902e-05	1.06632e-05	0.00013882	0.000114246	-3.7e-05	-0.000178935	0.000150252	-0.000223706	1.87931e-05	-5.40003e-05	0.000218	7.18953e-05	-3.37723e-06	9.53077e-05	-0.000104086	-5.10751e-05	-5.27308e-05	0.000259475
	29	6.5e-05	0.000166429	-0.000134283	5.18026e-05	4.50479e-05	-1.32953e-05	-0.000115432	-9.77503e-05	4.53893e-05	0.000105535	0.000176262	-0.000191	2.49548e-05	0.000208878	-0.000230361	1.41852e-05	-5.21503e-05	0.000305	-0.000213484	1.98269e-05	7.97585e-05	-0.000127873	-3.36279e-05	-5.19389e-05	0.000304208
	30	9.4e-05	0.000104936	-6.89598e-05	1.90625e-05	4.77387e-05	2.37116e-05	1.05351e-05	-0.000116845	4.05514e-05	4.46873e-06	0.000160649	-0.000192	4.8335e-05	0.000123093	-1.97658e-05	6.29378e-06	-8.56027e-05	0.000324	-0.000213496	-1.15607e-05	-2.52196e-06	-0.000110579	-2.68336e-05	-4.67132e-05	0.000275238
	31	8.4e-05	0.000136914	-4.76905e-05	1.04168e-05	-2.67442e-07	-2.50229e-05	-7.80841e-06	-0.00022156	5.32171e-05	4.35065e-06	3.91009e-05	-0.000135	-5.06317e-05	0.000131865	-3.75536e-05	-2.20358e-06	-8.08658e-05	9.6e-05	-0.000269602	-1.03224e-05	3.80654e-05	-3.88241e-05	-0.000176238	-7.17481e-05	0.000262155
	32	0.000121	7.50712e-05	8.32616e-05	1.15431e-05	-2.33337e-06	0.000100194	-5.87831e-06	-0.000145535	3.66513e-05	-8.99112e-06	-1.75593e-05	0.000162	-0.00016663	3.03702e-05	-4.3533e-05	4.21285e-07	-7.18546e-05	1.6e-05	-9.16809e-05	-4.66243e-05	3.80181e-05	-4.37538e-05	-0.000179144	-3.27266e-05	0.000139692
	33	0.000151	4.72413e-05	0.00015028	-4.78249e-05	2.20685e-05	2.41043e-05	-1.57461e-05	-0.00018904	4.52437e-05	-0.000153428	6.65735e-05	0.000135	-0.000155446	2.8686e-05	-4.31464e-05	1.46308e-06	8.40498e-05	4.6e-05	-0.000122712	3.81969e-06	-7.00637e-05	-9.14213e-05	-0.000215363	-5.06991e-06	9.02863e-05
	34	7.2e-05	-4.63289e-05	6.48901e-05	-0.000125746	1.82327e-05	4.61476e-05	-3.5699e-05	-0.000140886	4.79716e-05	-0.000129856	7.68311e-05	3.4e-05	-7.93522e-05	9.18355e-05	-9.53399e-05	-1.58347e-06	0.000114211	0.000151	-0.000212319	4.54722e-05	-0.000106115	-5.51258e-05	-4.56717e-05	2.60707e-05	0.000153854
	35	6.7e-05	2.89877e-05	7.26566e-05	-0.000147328	-0.000226751	-2.74106e-05	-2.08266e-05	-0.000101291	0.000118426	-0.000119453	7.72322e-05	-6.8e-05	-3.76907e-05	0.000207118	-6.72377e-05	1.4956e-05	0.000120581	0.000117	-0.000179686	7.0382e-05	-0.000105339	4.73514e-05	-4.1709e-05	2.61789e-05	0.000207593
	36	0.00012	5.93738e-05	5.76648e-05	-0.000102983	-0.000270085	7.38073e-06	1.36885e-05	-5.80327e-05	0.000149603	5.14673e-05	5.23643e-07	-4.1e-05	-2.0094e-05	0.000208235	-6.39318e-05	1.2501e-05	2.26509e-05	5.6e-05	-0.000247363	5.59317e-05	1.54672e-05	0.000105553	-7.48745e-05	-1.38212e-06	0.000211596
	37	5.2e-05	5.56903e-05	1.54752e-05	-1.94513e-05	-0.000264647	-6.72201e-06	5.10347e-05	-2.89209e-05	0.000195034	-9.14647e-05	-2.21221e-05	-1e-06	-5.65073e-06	9.16172e-05	0.000406557	6.20778e-06	-7.71024e-06	-4.7e-05	-0.000165934	1.51262e-05	-2.24804e-05	9.65922e-05	-0.000145835	5.3967e-05	3.76083e-05
	38	3.1e-05	-1.365e-05	1.03627e-05	-7.43487e-06	-0.00035743	-0.000152826	3.63193e-05	9.94219e-06	0.000204878	-0.000105922	-9.20621e-05	5.1e-05	-0.000104158	-8.47306e-07	0.000264691	-7.88702e-06	-4.87187e-05	-6.7e-05	-0.000168392	4.35683e-06	-2.2592e-05	0.000154318	-0.000153557	4.90318e-05	-4.55817e-06
	39	-2.3e-05	-9.34435e-06	-3.129e-05	-7.85087e-06	-0.000337291	-0.000146231	9.40746e-05	-2.83892e-05	0.000147038	-0.000124005	-8.80663e-05	-0.000105	-0.00024154	0.000100841	0.000149019	-1.371e-05	-2.59961e-05	-9.3e-05	-7.73607e-05	-2.11637e-06	-8.90822e-05	0.000185291	-8.59625e-05	6.64525e-05	1.32079e-05
	40	-2e-06	-5.53578e-05	1.44158e-05	-2.84797e-06	-0.000337552	-0.000101506	0.000184263	-3.31767e-05	0.000158909	-4.6933e-05	-0.000130155	-0.000103	-0.000202824	0.000124714	-0.000270944	-5.09753e-06	-3.8677e-05	-0.000119	-2.85098e-05	-9.21322e-05	-0.000157832	0.000174815	-3.78354e-05	-1.89918e-05	9.28691e-05
	41	-7.7e-05	-8.51986e-05	7.57472e-06	1.90859e-07	0.000143255	4.5373e-05	0.000160694	-4.23603e-05	0.000138749	2.74283e-05	0.00017918	-0.000154	-0.000226219	0.000117944	-0.000134538	-1.33996e-05	-2.11788e-05	0.000268	-2.52239e-05	-9.20338e-05	-0.000115137	-0.000226571	-3.14313e-05	-2.05792e-05	9.03156e-05
	42	-0.000126	-9.44733e-05	-5.17958e-06	0.000115812	0.00013844	-3.55701e-05	-3.90249e-06	-3.29079e-06	0.000116477	9.09759e-07	0.000141162	-8e-06	-0.00011235	3.89105e-06	-2.59095e-05	-2.05679e-06	-0.00015044	0.000304	-3.06032e-05	-0.000130395	-8.83287e-05	-0.000322657	-3.92604e-05	-0.000106603	7.32406e-05

## Sheet: PWM
#This is the data for sequence logos. Each row represents a base pair position in the logo
#and each entry represents the probability of being the base displayed on the
#top of that column.
#FNR regulating ykgE
A C G T
0.071242 0.078637 0.824973 0.025148
0.323701 0.285126 0.258288 0.132885
0.721703 0.096143 0.125104 0.057050
0.769937 0.031038 0.149733 0.049292
0.803305 0.020235 0.132401 0.044059
0.903712 0.013146 0.008547 0.074595
0.389189 0.253268 0.036224 0.321319
0.030464 0.125058 0.007342 0.837136
0.003380 0.004372 0.987430 0.004817
0.032224 0.048752 0.017512 0.901513
0.001886 0.002620 0.990471 0.005024
0.982950 0.005937 0.006828 0.004284
0.015809 0.724634 0.024505 0.235052
0.050049 0.890451 0.042629 0.016871
0.015572 0.629795 0.075418 0.279215
0.701809 0.091864 0.025290 0.181037
0.069215 0.255692 0.159399 0.515693
0.209662 0.240309 0.502173 0.047855
0.016497 0.026619 0.016502 0.940382
0.020331 0.741016 0.067503 0.171151
0.560374 0.048142 0.215184 0.176300
0.065611 0.859768 0.038951 0.035671
0.820821 0.097033 0.067184 0.014962
0.843299 0.005296 0.105308 0.046097
0.643287 0.021576 0.089877 0.245260
0.732226 0.104789 0.125498 0.037487
#FNR regulating yeiQ
A C G T
0.562632 0.155230 0.103517 0.178622
0.405437 0.106249 0.075583 0.412730
0.259309 0.095612 0.295553 0.349526
0.268656 0.011720 0.399586 0.320039
0.151661 0.053471 0.009697 0.785171
0.003550 0.007831 0.946295 0.042324
0.978604 0.004742 0.015141 0.001513
0.075615 0.473724 0.398027 0.052635
0.008178 0.975783 0.011304 0.004735
0.173873 0.090921 0.432039 0.303166
0.072163 0.221544 0.644840 0.061453
0.216655 0.001364 0.764069 0.017912
0.015179 0.061774 0.089203 0.833844
0.185214 0.050068 0.132148 0.632569
0.004325 0.971974 0.006414 0.017287
0.966377 0.005508 0.017656 0.010459
0.029140 0.925288 0.001547 0.044025
0.999580 0.000064 0.000138 0.000218
0.309593 0.016571 0.474307 0.199528
0.026735 0.008530 0.337556 0.627179
0.109116 0.003683 0.012505 0.874696
0.080573 0.023789 0.006160 0.889478
0.036235 0.282207 0.569071 0.112487
#FNR regulating yehU
A C G T
0.341470 0.091624 0.370092 0.196815
0.011991 0.001811 0.022397 0.963801
0.002780 0.011167 0.004058 0.981995
0.212522 0.067146 0.134528 0.585805
0.001823 0.045882 0.024999 0.927297
0.015092 0.037161 0.912927 0.034820
0.061441 0.011588 0.034972 0.891998
0.025219 0.075421 0.303032 0.596327
0.409958 0.282432 0.037186 0.270423
0.002419 0.106991 0.096257 0.794334
0.019762 0.276337 0.592772 0.111129
0.472154 0.151645 0.099259 0.276941
0.761156 0.044148 0.136825 0.057871
0.074556 0.354579 0.228380 0.342485
0.640810 0.082521 0.146878 0.129792
0.017096 0.034607 0.088457 0.859840
0.006325 0.874617 0.111095 0.007963
0.941028 0.038151 0.017957 0.002865
0.003481 0.886526 0.000713 0.109279
0.618104 0.078859 0.132154 0.170883
0.004437 0.273372 0.703271 0.018920
0.987801 0.003062 0.004193 0.004944
0.525972 0.464070 0.001796 0.008162
0.854284 0.052149 0.030359 0.063209
0.911054 0.012309 0.053518 0.023120
0.133634 0.140104 0.087532 0.638730
#FNR regulating fdhE
A C G T
0.254798 0.317342 0.360477 0.067382
0.013004 0.001683 0.000014 0.985298
0.019128 0.038487 0.720309 0.222076
0.023188 0.015997 0.072439 0.888376
0.007775 0.089844 0.860783 0.041598
0.878357 0.040706 0.010155 0.070783
0.240340 0.036089 0.568133 0.155438
0.190387 0.664795 0.131726 0.013092
0.169233 0.543612 0.157563 0.129591
0.263808 0.034559 0.468599 0.233034
0.011615 0.197996 0.752479 0.037909
0.102360 0.017163 0.820048 0.060428
0.035180 0.026528 0.005351 0.932942
0.001721 0.990567 0.006795 0.000917
0.925576 0.001016 0.004169 0.069238
0.002174 0.944496 0.044066 0.009263
0.604300 0.004055 0.372297 0.019349
0.183473 0.060771 0.345485 0.410271
0.115089 0.029176 0.517007 0.338728
#FNR regulating fdhE
A C G T
0.772684 0.031841 0.133979 0.061497
0.477930 0.273889 0.075418 0.172763
0.042138 0.041945 0.090427 0.825490
0.030327 0.044241 0.026524 0.898908
0.020764 0.004023 0.972071 0.003142
0.888221 0.054591 0.040007 0.017180
0.008649 0.878896 0.018149 0.094306
0.023689 0.719402 0.073424 0.183485
0.086325 0.062882 0.063534 0.787259
0.767722 0.144020 0.035735 0.052523
0.203070 0.231694 0.240313 0.324923
0.626652 0.014267 0.337316 0.021765
0.013439 0.051525 0.036745 0.898291
0.075184 0.847071 0.037327 0.040418
0.963158 0.004800 0.009214 0.022827
0.526831 0.083652 0.198720 0.190796
0.609394 0.023174 0.308426 0.059006
#FNR regulating aphA
A C G T
0.520748 0.021918 0.008821 0.448512
0.519517 0.216556 0.154834 0.109093
0.200483 0.279516 0.050252 0.469748
0.051568 0.011155 0.200589 0.736688
0.041795 0.356220 0.375220 0.226764
0.000765 0.005844 0.981548 0.011843
0.654169 0.155690 0.177042 0.013099
0.071471 0.417935 0.218368 0.292226
0.084250 0.632884 0.161035 0.121830
0.033931 0.159304 0.700764 0.106001
0.234105 0.198606 0.262474 0.304815
0.067387 0.054795 0.835956 0.041863
0.105531 0.027587 0.177560 0.689322
0.000433 0.001761 0.001284 0.996521
0.001091 0.998224 0.000212 0.000473
0.983836 0.011590 0.004299 0.000275
0.074291 0.920343 0.001267 0.004099
0.941915 0.000549 0.056109 0.001427
0.775518 0.003772 0.192201 0.028509
0.992108 0.004088 0.001418 0.002386
0.946471 0.022510 0.008668 0.022351
0.180813 0.361518 0.043975 0.413694
0.295582 0.285934 0.051711 0.366772
0.789068 0.060795 0.114709 0.035427
0.930510 0.001522 0.055716 0.012253
0.812387 0.073640 0.043843 0.070129
0.866383 0.011223 0.044416 0.077978
0.230674 0.051617 0.129748 0.587962
0.818476 0.063383 0.094774 0.023367
