# Supplementary material for: Deciphering the regulatory genome of Escherichia coli, one hundred promoters at a time
Source: eLife. 2020 Sep 21;9:e55308. doi: 10.7554/eLife.55308 (PMC7567609; doi:10.7554/eLife.55308)
Supplement: Figure 8—source data 1. [file elife-55308-fig8-data1.xlsx]

## Sheet: Sheet1
#Information footprints are already smoothed
Position	rapA_heat_info	tig_glpR_info	rhle_LB_info	tff-rpsB-tsf_arabinose_info	tff-rpsB-tsf_heat_info	maoP_glpR_info	rapA_arabinose_info	rhle_M9_info	tig_arabinose_info	maoP_heat_info	tig_M9_info	tff-rpsB-tsf_glpR_info	maoP_arabinose_info
-114	3.9e-05	1.50367e-05	-0.000178414	4.21916e-05	-1.62216e-05	-0.000272401	-2.7637e-05	1.24129e-06	-1.4042e-05	-0.000116	-7.88706e-06	-2.27955e-05	5.91153e-05
-113	9.4e-05	1.83623e-05	-0.000149319	4.20927e-05	-2.77342e-05	-0.000252242	5.51222e-06	3.78717e-06	-6.72817e-06	-0.000109	-8.17372e-06	-5.18258e-05	0.000143483
-112	0.000113	5.27241e-05	-9.6255e-05	4.91453e-05	-4.17512e-05	-7.60066e-05	2.32899e-05	6.32449e-06	-7.35158e-06	-2.4e-05	-1.44236e-05	-6.17165e-05	1.75117e-05
-111	0.000112	1.64775e-05	0.000122592	6.42639e-06	-4.30927e-05	2.74127e-05	4.43194e-05	2.55926e-06	-1.04319e-05	-6.8e-05	4.1171e-06	-2.33717e-05	-2.74755e-05
-110	0.000147	9.33766e-06	0.000146743	9.74045e-06	-1.50079e-05	1.05307e-05	-9.20243e-06	2.34707e-06	-2.7365e-05	-7.3e-05	6.58596e-06	-2.56201e-05	-2.01802e-05
-109	4.8e-05	-2.33092e-05	9.53977e-05	1.06468e-05	4.01023e-05	-7.98796e-07	-2.74038e-05	1.78371e-06	-3.14544e-05	-9.9e-05	-3.72926e-06	-1.6438e-06	-1.1515e-05
-108	0.000206	-2.00239e-06	2.39612e-05	1.35451e-05	6.56159e-05	3.72884e-06	-9.77682e-05	6.658e-06	-5.4915e-05	1.1e-05	-1.86391e-05	1.09535e-05	-8.1945e-06
-107	0.000351	1.40246e-05	-2.27242e-06	-1.60227e-05	3.07905e-05	7.34988e-06	-7.25766e-05	9.13729e-06	-6.13164e-05	9e-06	-1.94264e-05	1.42134e-05	-6.56513e-06
-106	0.000925	8.20622e-06	2.18229e-06	-6.60616e-05	9.74922e-05	-1.65324e-05	-0.000253395	6.34832e-06	-5.51389e-05	-4.9e-05	-1.89471e-06	7.90371e-05	6.67624e-06
-105	0.001347	5.68293e-05	3.30372e-05	-6.52794e-05	9.35714e-05	-5.9365e-05	-0.000173682	1.38077e-06	-3.09665e-05	-8.4e-05	-3.79686e-06	0.000102692	4.14877e-05
-104	0.001695	3.94506e-05	3.38633e-05	-4.83315e-05	9.75466e-05	-7.08479e-05	-0.000133703	2.35131e-06	-8.25071e-06	-8.3e-05	-2.51823e-06	0.000110179	4.0925e-05
-103	0.001142	3.68424e-05	7.94016e-05	-5.30658e-06	4.03245e-05	-0.000143437	0.000138498	1.72975e-06	-8.23535e-06	-0.000116	-3.8778e-06	3.80415e-05	-6.32492e-05
-102	0.000669	4.83715e-06	5.18387e-05	-2.55318e-06	3.14894e-05	-7.55598e-05	0.000125103	1.74405e-06	-5.26192e-06	-8.4e-05	1.06333e-06	8.696e-06	-0.000138173
-101	0.000108	5.86015e-06	4.97248e-05	4.0161e-06	2.86768e-05	-2.70594e-05	0.000112375	-1.22256e-06	1.27911e-05	-4.9e-05	-1.41028e-06	-1.1061e-05	-0.000149737
-100	0.000609	1.73409e-05	5.57401e-05	6.05456e-06	-5.65077e-06	7.70231e-05	3.31827e-05	-1.06486e-06	2.22748e-05	7.1e-05	-1.12457e-05	-1.19272e-05	-7.09158e-05
-99	0.000498	6.52624e-06	5.82309e-05	-3.29509e-06	-8.23624e-05	5.77475e-05	0.000108581	9.02829e-07	1.91431e-05	5.5e-05	-5.14319e-05	-3.93047e-05	-3.06569e-05
-98	0.000471	5.52276e-06	5.82736e-05	-1.80695e-05	-1.17622e-05	1.12008e-05	0.000101319	-1.12906e-07	1.47772e-06	3.9e-05	-4.26194e-05	2.43702e-05	-4.15712e-05
-97	1.7e-05	-2.73638e-06	-1.22506e-05	-5.47339e-05	-7.44484e-05	-5.88504e-05	3.19513e-05	1.34994e-06	-1.39627e-05	-7.8e-05	-3.85312e-05	-1.29185e-06	-1.096e-05
-96	-4e-05	1.89476e-05	-3.01876e-05	-7.00908e-05	7.52055e-06	-4.63045e-05	-5.909e-05	6.78861e-06	-7.91695e-05	-1.7e-05	2.84e-06	8.21363e-05	-1.03074e-05
-95	-3.4e-05	1.84915e-05	-1.77226e-05	-6.66368e-05	-2.59198e-05	-2.12587e-05	-8.12367e-05	1.19746e-05	-8.05356e-05	-4e-06	8.32656e-06	3.35437e-05	2.46694e-05
-94	-0.000142	3.15007e-05	1.28353e-05	-4.36617e-05	0.000112041	5.53968e-05	-2.36388e-05	7.26476e-06	-6.54767e-05	9.5e-05	1.11434e-05	5.88103e-05	1.73404e-05
-93	-0.000107	1.7928e-05	-4.52907e-05	-4.41003e-05	0.00011648	3.97932e-05	-2.22725e-05	1.53041e-06	9.98106e-06	3.7e-05	8.12601e-06	1.7354e-05	1.7787e-05
-92	-9.8e-05	7.58348e-07	3.39857e-05	-3.36018e-05	8.29044e-05	1.19602e-05	-3.43824e-07	-6.92278e-06	3.20048e-05	4e-06	6.57105e-05	1.62126e-05	-1.44684e-06
-91	6.2e-05	-9.87585e-06	2.37332e-05	-6.56873e-05	0.000176432	-1.17595e-05	-4.98955e-05	-4.01079e-06	3.1882e-05	-4e-06	7.18092e-05	6.02541e-05	-1.08781e-05
-90	0.000127	-3.94581e-05	9.64249e-05	-1.83943e-05	4.25873e-06	0.000112054	-8.24236e-05	-1.36465e-05	2.37016e-05	8.6e-05	7.37286e-05	9.75536e-06	-0.000177731
-89	0.000112	-2.57679e-05	-2.72437e-05	-1.75025e-05	-2.40525e-06	0.000192307	-8.39602e-05	-9.3064e-06	-4.79985e-06	0.000184	6.33944e-06	3.3799e-05	-0.00020175
-88	3.9e-05	-4.06912e-05	1.30951e-05	-1.5873e-05	-0.000275883	0.000203648	-5.09868e-05	-7.3761e-06	-1.67967e-05	0.00021	-3.1919e-06	-1.25329e-05	-0.000196151
-87	6e-06	-1.94564e-05	2.28689e-05	-4.17753e-05	-7.71167e-05	7.99166e-05	-0.000113011	-4.94123e-06	-4.43904e-05	0.000121	-3.24505e-06	1.3468e-05	-8.28002e-05
-86	-2.9e-05	-1.55571e-05	3.76766e-05	-4.65121e-05	0.000136535	-1.27985e-05	-0.000111381	-2.12293e-06	-4.11711e-05	1.7e-05	-1.34279e-05	-9.40378e-06	-6.03633e-05
-85	-1.6e-05	1.48582e-06	-5.4317e-05	-9.82887e-05	0.000672936	1.62888e-06	-0.00011024	1.31028e-06	-4.46678e-05	-2e-06	1.81057e-05	3.27185e-05	-3.04971e-05
-84	3.9e-05	4.07657e-05	-2.46478e-05	-0.000102606	0.000773597	-4.13689e-05	-2.28406e-05	-1.6754e-07	-2.62134e-05	-3.9e-05	1.79558e-05	5.59295e-05	4.42014e-05
-83	0.000106	4.60315e-06	8.61277e-06	-0.00012261	0.000615971	-3.37726e-05	-3.34973e-05	-1.17093e-05	-8.37654e-06	-3.8e-05	2.4787e-05	4.41026e-05	1.46885e-05
-82	0.000115	1.94105e-05	4.45822e-05	-3.0064e-05	0.000202984	-5.46942e-05	-8.33825e-05	-1.80156e-05	-2.27376e-06	-3.8e-05	8.93178e-05	-2.4586e-05	-1.53433e-05
-81	0.000156	-1.00441e-05	-6.87485e-05	-3.85683e-06	0.000332697	4.20695e-05	-7.94012e-05	-1.29844e-05	7.31528e-06	4.2e-05	9.4467e-05	-2.67998e-05	-0.000160172
-80	0.000124	2.36905e-05	-0.000155968	4.31285e-05	0.000285305	0.00019176	-6.90848e-05	-5.33767e-06	-6.03214e-06	0.000282	9.55687e-05	-2.67929e-05	-0.00028938
-79	0.000109	7.43965e-06	-5.64503e-05	5.28031e-05	0.000261952	0.000255626	-1.9504e-05	-3.60695e-06	-9.53361e-06	0.000342	1.35858e-05	2.40105e-06	-0.000347999
-78	3.5e-05	-2.31014e-06	9.54962e-05	3.40097e-05	2.07528e-06	0.000225681	-3.36868e-05	-1.04686e-05	-1.54638e-05	0.000353	-2.23773e-07	-1.00797e-05	-0.000246397
-77	3.5e-05	-9.29615e-06	0.000239819	1.29266e-05	-3.80947e-05	0.00011927	-3.7428e-05	-1.01631e-05	-1.00016e-05	0.00017	-1.83068e-06	-7.20923e-06	-0.000123317
-76	3e-05	1.03452e-05	0.000206817	3.33197e-06	-5.24902e-05	0.000127854	-6.02873e-05	-1.24592e-05	-1.67664e-05	0.000173	-1.52606e-05	-7.03166e-06	-0.000157728
-75	-8e-06	3.16278e-05	0.0001308	2.35541e-05	-5.62983e-05	0.000113377	-5.30479e-05	-3.73623e-06	-3.55005e-05	0.000124	-4.18217e-05	-1.57378e-05	-0.000148261
-74	0.000164	3.90407e-05	0.000122224	2.59039e-05	-1.73519e-05	9.46545e-05	-7.93933e-05	-2.40974e-05	-4.0854e-05	7.2e-05	-6.21234e-05	-1.32009e-05	-0.000112832
-73	0.000179	1.75923e-05	9.11132e-05	3.68859e-05	-4.55193e-05	0.000482738	-3.96897e-05	-2.12974e-05	-2.85494e-05	0.000372	-6.3743e-05	-1.68089e-05	-0.000498537
-72	0.000189	-5.63231e-06	0.000111346	2.67851e-05	-6.51786e-05	0.00111624	-2.11521e-05	-2.38197e-05	-4.57744e-06	0.000725	-2.62375e-05	-9.92974e-06	-0.00127778
-71	5.5e-05	-6.33632e-06	5.1592e-05	3.21794e-05	-6.39824e-05	0.00122237	9.54848e-06	-2.65076e-06	-5.58377e-05	0.000773	-3.76154e-07	-1.25033e-05	-0.00129459
-70	3.4e-05	7.98316e-07	1.17407e-05	2.68912e-05	-2.43816e-05	0.000755215	1.07377e-05	-3.66792e-06	-6.18353e-05	0.000408	5.22571e-06	-4.70745e-05	-0.000848562
-69	1.3e-05	2.87175e-05	1.3002e-05	3.73153e-05	-8.38943e-05	0.000203901	3.19104e-05	-2.23971e-06	-9.46987e-05	5.4e-05	-3.61972e-05	-0.000127407	-0.000212286
-68	2e-06	-3.37451e-05	-2.35095e-05	3.20599e-05	-8.38636e-05	0.000174015	9.77413e-05	-4.07265e-06	-4.59989e-05	0.000105	-3.96081e-05	-0.000136817	-0.000130946
-67	-1.1e-05	-4.56601e-05	0.000140834	2.63116e-05	-8.34717e-05	0.000137013	0.000116163	-3.45865e-06	-4.29259e-05	5.2e-05	-3.69561e-05	-0.000102581	6.24726e-05
-66	-7e-06	-7.88994e-05	6.26389e-05	2.54515e-06	-4.86673e-05	2.44713e-05	2.36466e-05	-3.10775e-07	-1.01014e-05	3.7e-05	-1.52428e-06	-2.10726e-05	0.000258153
-65	8e-06	-1.15215e-05	0.000136902	-6.1089e-06	-5.46792e-05	-8.15211e-05	-9.65677e-05	-3.78742e-06	1.22793e-05	-6.3e-05	-4.18204e-06	-2.66362e-06	0.000317367
-64	3.3e-05	1.681e-05	6.98579e-06	-5.10763e-06	-5.4907e-05	3.61126e-05	-0.000133883	4.59888e-06	1.78836e-05	2.5e-05	-1.00972e-05	1.66728e-06	0.000138517
-63	5.6e-05	-1.78277e-05	9.21307e-05	-2.64805e-06	-1.15607e-05	4.33279e-05	-0.000122495	-1.39995e-06	3.46983e-05	7e-06	7.60828e-06	-1.63486e-06	8.77214e-05
-62	8.2e-05	-2.08113e-05	4.89232e-05	7.39892e-06	-5.54405e-06	0.000202938	-6.86149e-05	1.18426e-05	1.79609e-05	1.4e-05	9.45741e-06	-1.96256e-06	-0.000138036
-61	9.3e-05	-4.22384e-05	3.21452e-05	-4.81061e-06	7.71627e-06	0.000486316	-6.60885e-05	2.00002e-06	7.58998e-06	0.000181	1.42323e-05	1.58268e-06	-0.000224721
-60	7.9e-05	5.2348e-05	6.10735e-06	-1.85487e-05	7.51201e-06	0.000647028	-9.10218e-05	6.19083e-06	-6.22079e-05	0.000254	-6.33289e-06	4.48698e-06	-0.000282172
-59	1.7e-05	6.0712e-05	7.12158e-06	-3.12723e-05	1.1845e-06	0.000506945	-9.63392e-05	1.86606e-05	-6.11157e-05	0.000249	-7.03377e-06	4.81101e-06	-0.000174052
-58	4e-06	6.23387e-05	2.29547e-05	-2.46148e-05	4.13399e-06	0.000136548	-7.95473e-05	1.45247e-05	-5.7774e-05	4.1e-05	-6.02865e-06	4.56899e-06	-0.000154382
-57	-9e-05	1.26822e-05	4.94776e-05	-3.69654e-05	0.000138755	0.000115124	-7.64951e-06	1.85688e-05	-4.66641e-06	9.5e-05	-4.5103e-06	4.2621e-05	-0.00020377
-56	-9.6e-05	2.69402e-06	8.6959e-05	-8.60293e-05	0.000196232	0.000135739	-9.36903e-06	-1.37576e-06	-1.67176e-05	9.5e-05	2.3834e-06	0.000126185	-0.000250572
-55	-8.6e-05	3.49993e-05	7.20328e-05	-9.72347e-05	0.000173356	0.00035796	-1.26447e-05	5.48823e-06	-7.04387e-05	0.000251	1.37978e-06	0.000120623	-5.415e-05
-54	3.8e-05	3.06038e-05	3.83579e-05	-7.04397e-05	4.17593e-05	0.000233678	-8.5973e-06	2.37207e-06	-8.10627e-05	0.000151	-3.44599e-05	7.60646e-05	4.75993e-05
-53	3.9e-05	2.9071e-05	-1.37946e-05	3.32142e-06	1.68463e-05	0.000121539	-3.1823e-06	4.50503e-06	-8.60172e-05	0.000116	-1.08389e-05	1.52942e-06	-6.25056e-05
-52	4.3e-05	-2.95213e-06	-1.49865e-05	7.98227e-05	-5.28982e-06	0.000457291	2.40845e-05	4.8801e-06	-3.55759e-05	0.000481	-9.69431e-06	-3.62865e-06	-0.000587871
-51	-3.8e-05	3.33603e-05	-1.20053e-05	8.15816e-05	2.60021e-06	0.000878153	-0.000136136	3.01938e-05	-6.53042e-05	0.000739	3.04266e-05	1.96318e-06	-0.00098351
-50	-3.8e-05	3.87609e-05	-1.60265e-05	6.55271e-05	-2.18972e-05	0.00121715	-0.000142131	3.5703e-05	-4.77282e-05	0.001071	-5.66378e-06	-6.31633e-07	-0.00103096
-49	-6.1e-05	8.93903e-05	1.54008e-05	5.91506e-06	-1.29575e-05	0.000904453	-0.000170952	3.40773e-05	-8.20045e-05	0.000743	-6.56342e-06	-4.77025e-06	-0.000894415
-48	-5e-05	5.96306e-05	3.47394e-05	-1.74197e-05	-4.2559e-05	0.00055403	-7.21339e-05	6.18352e-06	-3.97097e-05	0.00053	1.36159e-05	-2.79262e-05	-0.000484901
-47	-1.8e-05	5.61432e-05	7.35274e-05	-1.8992e-05	-9.19218e-05	0.00029792	-7.00665e-05	-2.39842e-06	-3.66842e-05	0.00023	1.85219e-05	-5.5706e-05	-0.000306288
-46	-2e-05	-3.06177e-06	0.000122133	-0.000105629	-6.97032e-05	0.000347506	-9.83072e-05	-1.8671e-06	-1.08824e-07	0.000199	1.80907e-05	9.20088e-05	-2.84385e-05
-45	8.1e-05	-1.18267e-05	7.29834e-05	-0.000466525	0.000129191	0.000303987	-9.5771e-05	1.727e-05	-7.02244e-06	0.000154	-1.50846e-06	0.000286787	-2.86655e-05
-44	0.000106	1.0666e-05	-2.17182e-05	-0.000537469	0.00010819	0.000453422	-0.000166	3.73169e-05	4.45913e-05	0.000452	-3.23644e-06	0.000220744	-7.75623e-05
-43	0.000158	1.87432e-05	-7.12308e-05	-0.000518934	0.000201223	0.00146449	-0.000170562	4.21983e-05	6.98392e-05	0.001329	-3.66269e-07	0.000143139	-0.00115668
-42	9e-05	-0.000150887	-3.58289e-05	-0.000247406	0.000214137	0.00213181	-0.000116366	2.46856e-05	0.000344582	0.001722	6.32824e-05	0.000114237	-0.00166846
-41	3.4e-05	-0.00028473	5.42139e-05	-0.00021058	0.000256305	0.00274481	-0.000141847	4.29244e-06	0.000174614	0.002044	9.40942e-05	0.000189292	-0.00222081
-40	5.7e-05	-0.000284185	3.18656e-05	-0.000157265	0.000189677	0.00129468	-0.000114179	4.4401e-07	0.000145141	0.000703	9.08676e-05	0.000134283	-0.0013219
-39	0.000134	-0.000116401	8.97484e-05	-0.000112718	0.00012098	0.000782504	-0.000121739	-1.18795e-05	-0.000124394	0.000449	1.88253e-05	6.84514e-05	-0.00106158
-38	8e-05	-3.2362e-06	7.41665e-05	-8.04369e-05	0.000147432	-3.74659e-05	-2.18569e-05	-1.26818e-05	-1.513e-05	-0.000213	-8.64061e-06	7.1638e-05	-0.000464369
-37	1.8e-05	0.000336244	7.49959e-05	-0.00163471	0.00130957	0.000129123	-0.000166214	-1.48506e-05	-0.000513534	0.000122	-3.12246e-05	0.00144424	-0.00031097
-36	-5.7e-05	0.00197825	1.86006e-05	-0.00158707	0.00118631	-5.4465e-05	-0.000281252	-5.33406e-06	-0.00236162	-3.8e-05	-0.000177583	0.00143267	-8.05838e-05
-35	-0.000834	-0.000131139	5.01636e-05	-0.00160456	0.00118158	3.06139e-05	-0.00123561	-5.37005e-06	-0.00465223	3e-05	0.000588679	0.00138174	-0.00022738
-34	-0.000806	0.000582969	1.75812e-05	-3.68656e-05	-8.82418e-06	3.5301e-05	-0.00170954	3.63031e-06	-0.00515397	4e-06	0.000549952	5.18068e-06	-0.000196705
-33	-0.000541	0.000308071	9.07365e-06	-2.76461e-05	-3.17819e-05	3.53691e-05	-0.00248145	4.86559e-06	-0.0051717	5e-05	0.000559625	-6.24928e-05	-0.000184439
-32	0.000766	0.00352801	-2.38278e-05	-0.000132856	5.19518e-06	0.000171526	-0.00258585	5.88966e-06	-0.00382982	0.000146	-0.00025356	9.80476e-05	-0.000100575
-31	0.000798	0.00249161	0.000145656	-0.00013244	1.17029e-05	0.000125931	-0.0026351	-9.7225e-06	-0.00274288	0.000127	-0.000220351	9.81062e-05	-0.00011941
-30	0.000403	0.00103145	0.000199953	-0.000113881	-2.79047e-05	0.000126713	-0.00215017	-1.37249e-05	-0.000632167	0.000103	-4.08876e-05	6.49402e-05	-0.000111969
-29	-6.6e-05	-0.000119451	0.00021238	3.80166e-06	-7.73176e-05	-1.93007e-05	-0.00121879	-1.32043e-05	0.000299688	-1.7e-05	2.10156e-05	-7.98537e-05	-7.43612e-05
-28	-0.000134	-0.000115466	0.000104759	3.56341e-06	-7.59696e-05	0.000297881	-0.000570386	-1.25842e-05	0.000208146	0.000254	4.91429e-05	-7.98543e-05	-0.000321967
-27	1e-05	-1.93844e-05	8.79517e-05	-5.20614e-05	1.51031e-05	0.000349181	-0.000221128	-8.0808e-06	-4.08281e-05	0.000335	1.71442e-05	-2.66436e-05	-0.000318689
-26	9.4e-05	1.34647e-05	9.67952e-05	-8.2242e-05	5.46193e-05	0.000310679	-0.00014502	-1.21365e-05	-5.06691e-05	0.000294	6.0406e-06	5.25057e-05	-0.000176695
-25	2.5e-05	2.8043e-06	0.000168368	-8.27245e-05	4.90043e-05	-4.16168e-05	-9.90492e-05	-1.56125e-05	-3.94519e-05	-0.000199	-2.39908e-05	5.10682e-05	0.000139471
-24	6.1e-05	1.17849e-05	0.000199157	-1.63249e-06	2.22586e-05	-3.82296e-05	-1.43416e-05	-2.22704e-05	-6.01654e-05	-0.000229	-3.53723e-05	4.30761e-05	9.70882e-05
-23	-0.000107	1.2677e-05	0.000152278	6.30246e-05	-5.05151e-06	-0.000325695	0.000144701	-1.80281e-05	-2.42683e-05	-0.000568	-4.43653e-05	-2.93855e-05	-0.000368093
-22	-3.8e-05	-5.94914e-06	3.79896e-05	5.78637e-05	-1.99437e-05	0.00127511	8.85285e-05	-1.24849e-05	-3.85981e-06	0.000335	-7.79019e-06	-2.58002e-05	-0.0013294
-21	-3.4e-05	-3.73586e-05	4.98234e-05	1.40768e-05	1.38831e-06	0.00203098	9.85139e-05	-1.489e-05	-7.38979e-05	0.000875	3.02597e-05	-3.31943e-05	-0.00171968
-20	-0.000191	-1.54333e-05	7.34081e-05	-0.000173783	1.49516e-05	0.00352101	0.000161224	-6.14277e-06	-9.62011e-05	0.0021	2.74296e-05	4.55146e-05	-0.00211169
-19	-0.000498	9.10125e-05	0.000137071	-0.000413579	0.00025489	0.00203718	0.000487262	-1.02831e-06	-1.39039e-05	0.001525	2.22624e-05	0.000300015	-0.00125552
-18	-0.000499	3.58307e-05	4.78299e-05	-0.000767498	0.000623678	0.00195102	0.000454006	1.48135e-05	0.000190672	0.001801	1.23127e-05	0.000699184	-0.000295507
-17	-0.000169	6.79006e-06	5.01769e-05	-0.00214549	0.00158848	0.000509888	7.24417e-06	1.16509e-06	0.000250162	0.000616	4.27967e-05	0.00163665	0.000665246
-16	7.7e-05	-0.000261676	6.81768e-06	-0.00364327	0.00230083	0.000104088	-0.000280179	2.38069e-05	0.000345121	-0.000264	0.000122707	0.0027016	0.00100544
-15	2.2e-05	-3.21051e-05	1.34875e-05	-0.0033303	0.00198625	-0.000749784	-6.39635e-05	3.65958e-05	4.61434e-05	-0.001521	6.74343e-06	0.00230367	0.0005059
-14	-0.000207	-5.58335e-05	1.7757e-05	-0.00431578	0.00214265	-0.000787511	-1.27131e-05	4.81834e-05	-1.90665e-05	-0.001844	4.12153e-05	0.00367694	0.000601759
-13	-9.7e-05	0.00121947	1.87954e-05	-0.00587899	0.00310308	-0.000486523	-0.000130655	3.9285e-05	-0.00188607	-0.001129	-0.000131455	0.00550015	0.000281277
-12	9e-06	0.00257525	2.96502e-05	-0.00665701	0.00359917	-0.000424879	-0.00114499	1.80184e-05	-0.00340156	-0.000869	-0.000175985	0.00621143	0.00024932
-11	0.000327	0.00296415	0.000129296	-0.00646051	0.00361595	-7.06906e-05	-0.0019601	1.11475e-05	-0.00378327	-0.0002	-0.000274683	0.00565033	-7.00142e-05
-10	0.00017	0.0025909	0.00011261	-0.00508195	0.00225113	6.75883e-05	-0.00195876	9.46276e-05	-0.00315236	-7.1e-05	-0.000371256	0.00351898	-5.21848e-05
-9	3.1e-05	0.00160177	-0.000123009	-0.00417408	0.0015346	0.000335435	-0.00137911	0.000213085	-0.00210135	0.000285	-0.000272559	0.00274998	-0.000169704
-8	2e-05	0.00276349	-0.000220989	-0.00184676	0.000367736	0.000279335	-0.000691721	0.000218623	-0.00364972	0.000334	-0.000266833	0.000955708	-0.000137674
-7	0.000296	0.00205551	-0.000229034	0.000299166	-0.000861313	0.000217271	-0.00149232	0.000124329	-0.00259274	0.000336	-8.59198e-05	-0.000237268	-0.000172872
-6	0.000484	0.00135663	9.658e-06	0.000284137	-0.000812325	9.23843e-05	-0.00110137	8.77434e-06	-0.00182308	0.000243	0.00011479	-0.000183081	-0.000113301
-5	0.000307	-0.00018985	2.40829e-05	0.000359155	-0.00122809	9.24014e-05	-0.000741212	9.26775e-06	0.000103317	0.000117	0.000251585	-0.000317428	-0.000119552
-4	-0.00037	-0.000213706	3.16316e-05	0.000156973	-0.00053178	7.64189e-05	0.000511908	4.68356e-06	8.44269e-05	6e-05	0.000260502	-0.000137961	-7.6559e-05
-3	-0.000686	-3.219e-05	1.9877e-05	0.000114796	-0.00061294	1.14827e-05	0.000506625	8.61822e-06	-2.71316e-05	-6e-05	0.000119831	-0.000192483	1.93247e-05
-2	-0.000794	-4.12766e-05	1.33651e-05	-0.000100513	-0.000482429	1.40584e-05	0.00050143	-5.45947e-07	4.82583e-05	1.9e-05	9.05759e-05	-0.000169332	3.07626e-05
-1	-0.000304	-6.45844e-05	1.63627e-05	-0.000196538	-0.000414196	1.33498e-05	0.000151402	-5.69372e-06	6.56465e-05	1.5e-05	9.2024e-05	-5.36543e-05	3.96895e-05
0	-0.000332	-0.000124207	0.000129279	-0.00022988	-0.000201914	0.000109976	-3.45174e-05	-1.89033e-05	7.8855e-05	5.4e-05	0.000220471	1.44245e-06	5.83158e-06
1	-0.000314	-0.000163491	0.000128682	-9.12481e-05	0.000103433	0.000212334	-4.032e-05	-1.51468e-05	4.39315e-05	0.000179	0.00015378	0.000117998	4.70647e-05
2	-0.000445	-0.00018235	0.000197561	-1.43629e-05	2.9879e-05	0.000211639	-7.02495e-05	-1.18592e-05	5.78424e-05	0.000188	0.000220377	1.93974e-06	4.47769e-05
3	-0.000357	-0.000147689	9.86373e-05	-1.99723e-05	-5.49448e-06	0.00012398	-3.45812e-05	-4.42982e-06	1.0546e-05	0.000155	6.98061e-05	2.65084e-06	4.22544e-05
4	-0.000311	-0.000162539	0.000118863	1.4646e-05	9.3345e-06	2.37468e-05	3.6872e-05	-7.94391e-06	7.27215e-05	2.1e-05	9.50038e-05	1.12149e-05	-4.12505e-06
5	-0.00017	-0.000140359	4.85345e-05	3.34752e-05	-8.76812e-05	-1.07496e-06	9.52672e-05	-2.84495e-06	4.31665e-05	-1.2e-05	2.59347e-05	-8.12601e-06	-6.89879e-06
6	2.7e-05	-0.000110436	6.45687e-05	0.00012185	-0.000210235	-2.23965e-05	8.59545e-05	-6.44981e-06	7.07884e-05	-4.5e-05	3.39941e-05	-0.000197923	-1.99847e-05
7	-0.000123	1.77996e-05	5.40907e-05	8.49227e-05	-0.000197819	-0.000124537	0.000202135	-1.37458e-05	-2.82732e-06	-0.000139	4.34672e-06	-0.000202918	-3.66381e-05
8	-0.000191	6.32446e-05	2.56209e-05	4.08042e-05	-5.19373e-05	-9.90071e-05	0.000191446	-1.55481e-05	-0.000101484	-0.000109	-5.64627e-05	-0.00014926	-3.47561e-05
9	-0.000427	3.10849e-05	-2.09075e-06	-2.78832e-05	9.62348e-05	-0.00018011	0.000256777	-2.41472e-05	-0.00012039	-0.000109	-1.29278e-05	4.21943e-05	0.000131045
10	-0.000349	-1.03121e-06	9.91114e-06	-3.34243e-05	2.38845e-05	-8.25555e-05	3.58169e-05	-1.51198e-05	-0.000122006	-6e-06	-5.35491e-05	-2.11562e-06	0.000150403
11	-0.000252	-1.77666e-05	2.05918e-05	-4.34736e-05	-0.000130841	-0.000144208	-1.55928e-06	-1.37563e-05	-2.57467e-05	-9.3e-05	2.18751e-06	-5.51935e-05	0.000222937
12	-4.9e-05	1.59716e-05	6.22595e-05	-0.000120752	-0.000118148	-6.378e-05	-0.000125026	-1.74641e-06	-9.7487e-06	-7.7e-05	-4.87946e-05	2.013e-05	7.21167e-05
13	7.3e-05	5.45062e-05	-0.000347955	-0.00011365	-9.73382e-05	-6.48549e-05	-9.71006e-05	2.53002e-05	-9.84782e-05	-9.2e-05	-1.96464e-05	4.48753e-05	3.80635e-05
14	5.2e-05	3.4726e-05	-0.000391377	-7.50124e-05	1.57616e-05	4.97155e-06	-9.4032e-05	2.41491e-05	-6.58318e-05	-2.4e-05	-1.188e-05	6.64277e-05	-3.38617e-05
15	-9.9e-05	3.72828e-05	-0.000347676	-2.21395e-06	-8.15412e-06	2.58671e-05	-7.13219e-05	2.34241e-05	-8.18485e-05	-8e-06	-8.91639e-06	-9.32244e-06	-3.18251e-05
16	-0.000115	-8.65583e-07	3.10404e-05	1.85701e-06	2.42976e-06	0.000101621	-6.06426e-05	-2.46604e-06	9.88395e-06	8e-06	1.49169e-06	2.12595e-06	-4.93857e-05
17	-0.000277	-6.1114e-06	0.000132935	1.41636e-06	6.51285e-07	8.84145e-05	-6.17624e-05	-3.17755e-06	-1.89334e-05	2e-05	3.27008e-05	2.67016e-06	1.65365e-05
18	-0.000114	-2.68336e-05	4.64181e-05	-5.20231e-05	5.35051e-05	6.85202e-05	-0.00019336	-6.50704e-07	1.38233e-05	3e-06	3.39643e-05	3.33175e-05	1.30956e-05
19	-0.000125	2.41104e-05	6.3273e-05	-5.80951e-05	6.97765e-05	-4.36109e-06	-0.000180124	-4.84969e-07	-4.069e-05	-3e-06	3.02012e-05	4.14934e-05	6.19367e-05
20	4e-06	-1.84896e-05	4.27522e-05	-5.84365e-05	6.93706e-05	4.67142e-07	-9.01359e-05	1.84693e-06	-3.95505e-05	1.4e-05	3.63976e-05	3.07271e-05	-3.97207e-06
21	-6.2e-05	-1.43596e-05	7.33027e-05	-5.51192e-06	1.16812e-05	4.19929e-05	6.06014e-05	1.84527e-06	-5.08322e-05	4.3e-05	4.43954e-05	-2.04038e-06	-4.74241e-05
22	-3.7e-05	-0.00012947	4.6538e-05	-1.47234e-05	3.78194e-05	4.20954e-05	4.8322e-05	1.62977e-06	-0.000105349	3.8e-05	0.000103852	1.13789e-05	-4.5092e-05
23	8e-06	-0.000136846	2.64625e-05	-8.71454e-06	3.38701e-05	6.41256e-05	-5.66968e-05	-2.33383e-06	-0.000142604	7.1e-05	9.16869e-05	-8.19207e-07	-9.9276e-05
24	-0.00032	-0.000137312	-0.00103378	2.796e-05	2.47529e-05	7.97775e-05	0.000226375	7.1774e-05	-0.000145288	5.3e-05	7.99969e-05	-3.53186e-06	-6.57052e-05
25	-0.000317	-0.000199436	-0.00107582	3.09698e-05	-7.55395e-06	7.77416e-05	0.000109381	9.22057e-05	-7.06672e-05	4.9e-05	4.08854e-05	-2.90608e-05	-6.64613e-05
26	-0.0004	-0.000122223	-0.00103855	1.14275e-05	4.25854e-05	4.41588e-05	2.29053e-05	9.54396e-05	-3.79194e-05	-1e-06	1.26974e-05	6.62842e-06	-3.39798e-05
27	-0.000115	-6.64605e-05	-1.23961e-05	-0.000144689	0.000131009	-1.17927e-05	-0.000282543	2.91589e-05	-8.24845e-05	-1.1e-05	1.50165e-05	9.30066e-05	-3.22146e-05
28	2.9e-05	6.40493e-05	8.53978e-05	-0.000127878	0.00013882	0.000114246	-0.000178935	1.87931e-05	-5.40003e-05	0.000218	-3.37723e-06	9.53077e-05	-0.000104086
29	6.5e-05	5.18026e-05	4.50479e-05	-0.000115432	0.000105535	0.000176262	2.49548e-05	1.41852e-05	-5.21503e-05	0.000305	1.98269e-05	7.97585e-05	-0.000127873
30	9.4e-05	1.90625e-05	4.77387e-05	1.05351e-05	4.46873e-06	0.000160649	4.8335e-05	6.29378e-06	-8.56027e-05	0.000324	-1.15607e-05	-2.52196e-06	-0.000110579
31	8.4e-05	1.04168e-05	-2.67442e-07	-7.80841e-06	4.35065e-06	3.91009e-05	-5.06317e-05	-2.20358e-06	-8.08658e-05	9.6e-05	-1.03224e-05	3.80654e-05	-3.88241e-05
32	0.000121	1.15431e-05	-2.33337e-06	-5.87831e-06	-8.99112e-06	-1.75593e-05	-0.00016663	4.21285e-07	-7.18546e-05	1.6e-05	-4.66243e-05	3.80181e-05	-4.37538e-05
33	0.000151	-4.78249e-05	2.20685e-05	-1.57461e-05	-0.000153428	6.65735e-05	-0.000155446	1.46308e-06	8.40498e-05	4.6e-05	3.81969e-06	-7.00637e-05	-9.14213e-05
34	7.2e-05	-0.000125746	1.82327e-05	-3.5699e-05	-0.000129856	7.68311e-05	-7.93522e-05	-1.58347e-06	0.000114211	0.000151	4.54722e-05	-0.000106115	-5.51258e-05
35	6.7e-05	-0.000147328	-0.000226751	-2.08266e-05	-0.000119453	7.72322e-05	-3.76907e-05	1.4956e-05	0.000120581	0.000117	7.0382e-05	-0.000105339	4.73514e-05
36	0.00012	-0.000102983	-0.000270085	1.36885e-05	5.14673e-05	5.23643e-07	-2.0094e-05	1.2501e-05	2.26509e-05	5.6e-05	5.59317e-05	1.54672e-05	0.000105553
37	5.2e-05	-1.94513e-05	-0.000264647	5.10347e-05	-9.14647e-05	-2.21221e-05	-5.65073e-06	6.20778e-06	-7.71024e-06	-4.7e-05	1.51262e-05	-2.24804e-05	9.65922e-05
38	3.1e-05	-7.43487e-06	-0.00035743	3.63193e-05	-0.000105922	-9.20621e-05	-0.000104158	-7.88702e-06	-4.87187e-05	-6.7e-05	4.35683e-06	-2.2592e-05	0.000154318
39	-2.3e-05	-7.85087e-06	-0.000337291	9.40746e-05	-0.000124005	-8.80663e-05	-0.00024154	-1.371e-05	-2.59961e-05	-9.3e-05	-2.11637e-06	-8.90822e-05	0.000185291
40	-2e-06	-2.84797e-06	-0.000337552	0.000184263	-4.6933e-05	-0.000130155	-0.000202824	-5.09753e-06	-3.8677e-05	-0.000119	-9.21322e-05	-0.000157832	0.000174815
41	-7.7e-05	1.90859e-07	0.000143255	0.000160694	2.74283e-05	0.00017918	-0.000226219	-1.33996e-05	-2.11788e-05	0.000268	-9.20338e-05	-0.000115137	-0.000226571
42	-0.000126	0.000115812	0.00013844	-3.90249e-06	9.09759e-07	0.000141162	-0.00011235	-2.05679e-06	-0.00015044	0.000304	-0.000130395	-8.83287e-05	-0.000322657
