# Supplementary material for: Deciphering the regulatory genome of Escherichia coli, one hundred promoters at a time
Source: eLife. 2020 Sep 21;9:e55308. doi: 10.7554/eLife.55308 (PMC7567609; doi:10.7554/eLife.55308)
Supplement: Figure 9—source data 1. [file elife-55308-fig9-data1.xlsx]

## Sheet: Information_footprints
#Information footprints are already smoothed
position	info_arcA_Anaero	info_fdhE_delta_ArcA
-114	0.000126342	0.000359858
-113	0.000100293	0.000323347
-112	1.87545e-06	-4.36573e-05
-111	-2.90449e-05	-5.5688e-05
-110	4.40261e-05	-3.9002e-05
-109	3.78792e-06	-1.48107e-05
-108	1.39355e-06	-2.65006e-05
-107	-2.61303e-05	-1.53947e-05
-106	2.09713e-05	-1.76857e-05
-105	2.89061e-05	1.63413e-05
-104	2.7585e-05	-1.94502e-05
-103	1.60453e-05	-2.62042e-05
-102	-1.15314e-05	-2.80732e-05
-101	1.1249e-05	4.98735e-06
-100	0.000315478	9.86887e-05
-99	0.000336314	0.000108472
-98	0.000305266	0.000128439
-97	3.42501e-07	4.52909e-05
-96	5.84995e-05	1.4556e-05
-95	5.07443e-05	-2.35868e-05
-94	4.44979e-05	-2.68659e-05
-93	3.75194e-05	9.33003e-07
-92	0.0002894	2.16774e-05
-91	0.000304892	-1.85402e-05
-90	0.000553175	-2.13401e-05
-89	0.000746692	-8.47227e-05
-88	0.00177479	-7.53588e-05
-87	0.00190898	-7.06047e-05
-86	0.0014777	-4.56618e-05
-85	0.000262325	-3.49829e-05
-84	6.61999e-05	-2.63373e-05
-83	0.000300324	-1.68091e-05
-82	0.000487866	-2.01112e-05
-81	0.000369394	-2.21733e-05
-80	0.000593971	-1.1041e-05
-79	0.000916168	9.43576e-06
-78	0.00165002	-2.7985e-06
-77	0.00124596	1.91295e-05
-76	0.000712896	-5.75538e-06
-75	-6.79655e-05	-7.24723e-06
-74	9.53655e-06	-2.86381e-05
-73	0.0002319	-1.91977e-05
-72	-2.26236e-05	-4.29777e-05
-71	-0.000173647	-4.16015e-05
-70	-0.000102883	-2.55656e-05
-69	7.66256e-05	0.000161547
-68	-6.15688e-05	0.000156932
-67	-0.000174036	0.000153893
-66	-8.6907e-05	-4.31323e-06
-65	-0.000517753	8.16477e-05
-64	-0.000373843	8.89604e-05
-63	-0.000483127	6.11099e-05
-62	5.43938e-05	-2.25474e-05
-61	1.18247e-06	-2.35424e-05
-60	2.53997e-05	9.46063e-07
-59	5.55626e-05	1.34521e-06
-58	-1.28236e-05	-1.80312e-05
-57	-0.000130161	1.50918e-06
-56	-8.12141e-05	-3.379e-05
-55	-9.63347e-05	-3.44988e-05
-54	1.77201e-05	-5.43105e-05
-53	-6.78716e-05	-2.62379e-05
-52	-9.38916e-05	-1.07277e-05
-51	-8.76442e-05	-1.40095e-05
-50	-4.69285e-05	-1.22048e-05
-49	4.80861e-05	1.35296e-05
-48	4.59684e-05	1.73368e-05
-47	8.95465e-07	5.19905e-05
-46	-0.000150974	6.24295e-05
-45	-9.10982e-05	5.07179e-05
-44	-4.95291e-05	5.70837e-06
-43	1.07007e-05	-2.67282e-05
-42	-4.79864e-05	-1.70365e-05
-41	-2.56594e-05	-1.25936e-06
-40	5.98106e-05	8.03841e-05
-39	3.56357e-05	5.44675e-05
-38	5.45306e-05	-3.27329e-05
-37	0.00048337	-9.26429e-05
-36	0.000647834	-1.90818e-05
-35	0.000636855	6.88873e-05
-34	0.000338824	0.000104662
-33	0.000198592	6.49354e-05
-32	0.000177226	6.24234e-05
-31	-0.000127159	6.7916e-07
-30	-2.74025e-05	-1.69794e-05
-29	6.59107e-05	-4.38958e-05
-28	0.000244268	-4.28275e-05
-27	0.000147164	-3.17345e-05
-26	5.03769e-05	-1.32324e-06
-25	-3.46457e-06	5.01382e-06
-24	-7.03177e-06	2.07392e-05
-23	-9.77468e-06	-1.13659e-05
-22	0.000182752	-1.32624e-05
-21	0.000226626	-5.15939e-05
-20	0.000419298	-2.11482e-05
-19	0.000164414	-2.03574e-05
-18	8.09224e-05	0.000121562
-17	-0.000119309	0.000127148
-16	0.000212882	0.000125956
-15	0.000234236	-3.9381e-05
-14	0.000570701	-2.27625e-05
-13	0.00113006	-2.49459e-05
-12	0.00103475	2.28496e-05
-11	0.000695172	5.73477e-06
-10	5.10947e-05	5.15099e-06
-9	0.000348759	-3.09724e-05
-8	0.000409342	-3.61477e-05
-7	0.000291345	-4.05092e-05
-6	0.000181476	2.8192e-06
-5	0.000153273	5.06779e-06
-4	1.97508e-05	1.20043e-05
-3	-8.42598e-05	1.70663e-06
-2	-9.10166e-05	-1.55807e-05
-1	1.44189e-05	-1.64987e-05
0	4.38969e-05	-1.24501e-05
1	5.84959e-05	1.95063e-06
2	1.21723e-06	1.85078e-06
3	-1.51483e-05	-5.64225e-05
4	-4.55983e-05	-4.81925e-05
5	6.35547e-05	-4.69218e-05
6	0.000146986	8.80314e-06
7	0.000168537	0.00020692
8	8.24769e-05	0.000323769
9	-1.21052e-06	0.000323692
10	-7.71113e-05	0.000118983
11	-6.25591e-05	-2.00891e-05
12	6.71385e-05	-8.82325e-06
13	0.000128289	8.24533e-06
14	0.000163347	3.65685e-05
15	5.26308e-05	0.0001306
16	5.21353e-05	0.000109426
17	1.7533e-06	6.49626e-05
18	-8.43744e-05	-5.09751e-05
19	1.47638e-05	4.76919e-05
20	2.42622e-05	7.30975e-05
21	0.000244593	8.45147e-05
22	0.000228916	-1.13485e-05
23	0.00024751	1.20031e-05
24	0.000244745	1.4587e-05
25	0.000172507	2.27346e-05
26	0.000144128	1.13444e-05
27	7.05045e-05	4.19413e-06
28	0.00011794	-1.60169e-05
29	0.000166429	-4.15072e-05
30	0.000104936	-3.61327e-05
31	0.000136914	-1.88443e-05
32	7.50712e-05	9.30549e-06
33	4.72413e-05	-1.78041e-06
34	-4.63289e-05	7.80454e-06
35	2.89877e-05	-1.38999e-05
36	5.93738e-05	-3.17712e-06
37	5.56903e-05	5.67457e-05
38	-1.365e-05	7.5563e-05
39	-9.34435e-06	7.43927e-05
40	-5.53578e-05	-6.31973e-05
41	-8.51986e-05	-6.60144e-05
42	-9.44733e-05	-1.35468e-05

## Sheet: PWM
#This is the data for sequence logos. Each row represents a base pair position in the logo
#and each entry represents the probability of being the base displayed on the
#top of that column.
#FNR logo regulating arcA
A C G T
0.772684 0.031841 0.133979 0.061497
0.477930 0.273889 0.075418 0.172763
0.042138 0.041945 0.090427 0.825490
0.030327 0.044241 0.026524 0.898908
0.020764 0.004023 0.972071 0.003142
0.888221 0.054591 0.040007 0.017180
0.008649 0.878896 0.018149 0.094306
0.023689 0.719402 0.073424 0.183485
0.086325 0.062882 0.063534 0.787259
0.767722 0.144020 0.035735 0.052523
0.203070 0.231694 0.240313 0.324923
0.626652 0.014267 0.337316 0.021765
0.013439 0.051525 0.036745 0.898291
0.075184 0.847071 0.037327 0.040418
0.963158 0.004800 0.009214 0.022827
0.526831 0.083652 0.198720 0.190796
0.609394 0.023174 0.308426 0.059006
#FNR regulating fdhE
A C G T
0.254798 0.317342 0.360477 0.067382
0.013004 0.001683 0.000014 0.985298
0.019128 0.038487 0.720309 0.222076
0.023188 0.015997 0.072439 0.888376
0.007775 0.089844 0.860783 0.041598
0.878357 0.040706 0.010155 0.070783
0.240340 0.036089 0.568133 0.155438
0.190387 0.664795 0.131726 0.013092
0.169233 0.543612 0.157563 0.129591
0.263808 0.034559 0.468599 0.233034
0.011615 0.197996 0.752479 0.037909
0.102360 0.017163 0.820048 0.060428
0.035180 0.026528 0.005351 0.932942
0.001721 0.990567 0.006795 0.000917
0.925576 0.001016 0.004169 0.069238
0.002174 0.944496 0.044066 0.009263
0.604300 0.004055 0.372297 0.019349
0.183473 0.060771 0.345485 0.410271
0.115089 0.029176 0.517007 0.338728
#ArcA regulating fdhE
A C G T
0.137373 0.113793 0.121328 0.627505
0.034708 0.037284 0.100679 0.827329
0.102950 0.028914 0.822074 0.046062
0.290082 0.057601 0.273565 0.378752
0.302912 0.162096 0.231410 0.303582
0.965610 0.007994 0.004536 0.021860
0.175343 0.017733 0.647744 0.159179
0.912864 0.016601 0.005792 0.064743
0.112115 0.005641 0.023457 0.858787
0.050427 0.008614 0.637172 0.303786
0.018556 0.013525 0.036039 0.931881
0.871029 0.055390 0.021698 0.051883
0.444809 0.299025 0.069438 0.186728
0.005723 0.027418 0.021779 0.945079
0.004212 0.003903 0.071157 0.920728
0.029606 0.020582 0.854205 0.095606
0.996771 0.000046 0.003062 0.000121
0.156822 0.781974 0.016309 0.044896
0.658835 0.061654 0.026735 0.252775
0.088080 0.208980 0.561767 0.141172
0.569659 0.288040 0.098185 0.044116

## Sheet: EnergyMatrix
#This file contains the energy matrices displayed in figure 4. The expected
#transcription start site (from prexisting data)
# for all designed sequences was at position 115, although
#the true transcription start site was not necessarily there.
#FNR regulating fdhE
pos val_A val_C val_G val_T
44 -0.002794 -0.005326 -0.007047 0.015167
45 -0.015489 0.012556 0.076861 -0.073928
46 0.022671 0.013662 -0.025895 -0.010438
47 0.014684 0.020129 -0.000266 -0.034547
48 0.029597 -0.003016 -0.033531 0.006950
49 -0.034145 0.007766 0.026515 -0.000137
50 -0.005184 0.020852 -0.016369 0.000701
51 -0.006276 -0.022729 -0.000870 0.029874
52 0.002581 -0.012745 0.003978 0.006185
53 -0.005557 0.022322 -0.012883 -0.003882
54 0.027432 -0.010431 -0.028460 0.011459
55 -0.000999 0.023547 -0.028666 0.006118
56 0.003539 0.007783 0.029402 -0.040724
57 0.023750 -0.061637 0.005640 0.032247
58 -0.050213 0.042238 0.023175 -0.015200
59 0.035339 -0.046248 -0.004860 0.015769
60 -0.030363 0.037644 -0.023390 0.016109
61 0.000907 0.016260 -0.007207 -0.009960
62 0.003867 0.022831 -0.015988 -0.010710
#ArcA regulating fdhE
pos val_A val_C val_G val_T
64 0.005301 0.009390 0.008200 -0.022891
65 0.019690 0.018955 0.000519 -0.039165
66 -0.000281 0.023881 -0.038245 0.014645
67 -0.006832 0.023765 -0.005150 -0.011782
68 -0.004437 0.007761 0.001154 -0.004478
69 -0.064989 0.024579 0.035096 0.005314
70 -0.005314 0.037804 -0.028972 -0.003519
71 -0.054644 0.020318 0.039861 -0.005534
72 -0.011979 0.044097 0.017648 -0.049765
73 0.011605 0.044995 -0.034876 -0.021723
74 0.019487 0.025950 0.007761 -0.053198
75 -0.043300 0.008429 0.025822 0.009049
76 -0.014784 -0.006820 0.020278 0.001325
77 0.036866 0.008385 0.012658 -0.057909
78 0.037461 0.039469 -0.014410 -0.062520
79 0.019055 0.026396 -0.042750 -0.002701
80 -0.115311 0.070653 -0.007344 0.052003
81 -0.009147 -0.038372 0.033453 0.014066
82 -0.030601 0.013958 0.029465 -0.012822
83 0.014497 -0.000944 -0.019296 0.005742
84 -0.023488 -0.010238 0.009736 0.023990
#FNR regulating arcA
pos val_A val_C val_G val_T
24 -0.055503 0.039389 -0.002942 0.019055
25 -0.025664 -0.008320 0.029673 0.004312
26 0.027029 0.028107 0.005477 -0.060613
27 0.026284 0.016102 0.031173 -0.073558
28 0.001860 0.051155 -0.110503 0.057488
29 -0.072904 0.010211 0.019367 0.043326
30 0.056617 -0.078578 0.035725 -0.013764
31 0.048076 -0.051538 0.015693 -0.012231
32 0.011217 0.021494 0.021190 -0.053901
33 -0.055140 -0.004898 0.036163 0.023875
34 0.005202 0.002260 0.001184 -0.008645
35 -0.057636 0.054734 -0.038447 0.041349
36 0.047783 0.009136 0.019095 -0.076014
37 0.007637 -0.062766 0.029208 0.025921
38 -0.101320 0.055802 0.036593 0.008924
39 -0.028685 0.026469 0.000980 0.001236
40 -0.046761 0.050497 -0.025757 0.022021
