# Supplementary material for: Deciphering the regulatory genome of Escherichia coli, one hundred promoters at a time
Source: eLife. 2020 Sep 21;9:e55308. doi: 10.7554/eLife.55308 (PMC7567609; doi:10.7554/eLife.55308)
Supplement: Figure 10—source data 1. [file elife-55308-fig10-data1.xlsx]

## Sheet: Sheet1
pos	info_bdcR_arabinose
-115	-1.24675e-08
-114	-0.000243503
-113	-0.000485676
-112	0.000114607
-111	-0.000124745
-110	0.000404744
-109	-3.28511e-05
-108	-6.54364e-05
-107	-3.06783e-06
-106	-0.000123116
-105	0.000325495
-104	3.86174e-06
-103	6.73856e-05
-102	6.18801e-07
-101	2.76066e-05
-100	1.13609e-05
-99	3.14637e-05
-98	0.000155829
-97	9.08927e-09
-96	-0.000102998
-95	-2.33129e-05
-94	-4.40872e-06
-93	-1.41287e-09
-92	-1.49803e-07
-91	-4.45907e-05
-90	-1.44368e-05
-89	1.09391e-05
-88	1.15985e-07
-87	2.96353e-05
-86	-1.20303e-05
-85	-5.24447e-05
-84	-5.94323e-05
-83	-0.000266966
-82	1.72478e-05
-81	-1.60026e-05
-80	5.59148e-05
-79	-9.43096e-05
-78	-1.23371e-05
-77	0.000109048
-76	3.20787e-07
-75	-0.000141101
-74	-0.000122939
-73	-0.000388675
-72	-3.79782e-05
-71	-9.94409e-05
-70	-7.12138e-05
-69	1.63502e-05
-68	-4.89173e-05
-67	-0.000263449
-66	-0.00028436
-65	5.85962e-06
-64	3.07701e-05
-63	1.72915e-07
-62	-7.63165e-05
-61	-1.15529e-05
-60	-2.23512e-05
-59	-9.39443e-05
-58	-6.98791e-05
-57	-3.25948e-05
-56	-0.000235821
-55	-1.22147e-05
-54	-2.1498e-05
-53	-0.000145848
-52	0.000217834
-51	3.98339e-05
-50	0.000504553
-49	-0.000197311
-48	-3.81528e-05
-47	-0.000567996
-46	3.211e-07
-45	5.77281e-06
-44	-2.99213e-05
-43	-0.000200149
-42	-0.000183627
-41	-2.69424e-06
-40	-1.67195e-05
-39	6.01044e-05
-38	0.000914675
-37	-6.0918e-05
-36	-0.000102272
-35	-0.000399328
-34	-0.00444326
-33	-0.0041151
-32	-0.00422256
-31	-0.00171866
-30	-2.63152e-05
-29	-0.000559322
-28	-0.00213198
-27	0.000399257
-26	1.50047e-05
-25	0.000567668
-24	6.24402e-06
-23	0.000715212
-22	0.0005666
-21	0.00228224
-20	0.00161111
-19	4.64689e-05
-18	-0.00109115
-17	-0.000131542
-16	-0.00175243
-15	-0.000773424
-14	0.000133277
-13	-1.21918e-06
-12	-0.000193546
-11	-0.00130224
-10	-0.00320231
-9	-0.00129528
-8	-0.00117094
-7	0.00133072
-6	0.00291948
-5	0.000469221
-4	-0.000281786
-3	-5.62572e-05
-2	-3.79918e-08
-1	-0.000174839
0	7.54151e-07
1	0.000346629
2	-6.9917e-05
3	-0.000186825
4	-5.24642e-05
5	-1.21658e-05
6	-7.1157e-05
7	-0.000123859
8	-0.000141343
9	-1.18411e-06
10	-5.13881e-06
11	-1.86643e-05
12	-1.72868e-05
13	-0.000263828
14	-0.000144402
15	-2.11733e-05
16	-1.76377e-05
17	4.93471e-07
18	-5.80535e-07
19	4.48998e-05
20	4.79698e-06
21	0.000628233
22	0.00019711
23	6.56379e-05
24	0.000700472
25	-1.87407e-05
26	-1.60716e-06
27	-0.000185416
28	-6.15861e-06
29	-0.000221673
30	-0.000160461
31	3.05094e-06
32	1.03128e-05
33	-6.73568e-10
34	0.000236003
35	2.23635e-05
36	6.92601e-05
37	2.01782e-05
38	2.15979e-05
39	1.71968e-06
40	-1.86706e-06
41	-4.79863e-05
42	-4.47351e-05
43	-2.74496e-05
44	-1.94757e-06
#bdcR energy matrix
pos	val_A	val_C	val_G	val_T
87	0.037015	0.065696	-0.00617	-0.096542
88	0.041789	-0.010086	0.038661	-0.070364
89	0.010197	-0.02156	0.003467	0.007896
90	0.001152	-0.003958	-0.045551	0.048357
91	-0.005142	0.008802	-0.010527	0.006867
92	-0.010519	-0.013273	-0.030357	0.054149
93	-0.013058	-0.032117	0.047721	-0.002546
94	-0.004187	-0.093725	0.001501	0.096411
95	0.081073	-0.022323	-0.012907	-0.045843
96	-0.013991	-0.021895	0.018423	0.017463
97	-0.081076	0.066884	-0.012547	0.026739
98	-0.02267	0.031079	0.038204	-0.046614
99	0.01934	0.040283	0.027868	-0.087492
100	0.018999	0.003119	-0.057205	0.035087
#bdcR pwm
A	C	G	T
0.177621	0.802321	0.019875	0.000184
0.511855	0.036623	0.449927	0.001595
0.354598	0.071439	0.258961	0.315002
0.075555	0.059975	0.007054	0.857416
0.173799	0.36776	0.13602	0.32242
0.033177	0.02973	0.012343	0.92475
0.037503	0.014522	0.88356	0.064414
0.005572	5.7e-05	0.00771	0.986661
0.985509	0.004976	0.008078	0.001437
0.081921	0.056319	0.448408	0.413352
0.000419	0.877199	0.014723	0.107659
0.024169	0.396575	0.572207	0.00705
0.177342	0.537948	0.283983	0.000727
0.265611	0.121133	0.005434	0.607822
