# Supplementary material for: Deciphering the regulatory genome of Escherichia coli, one hundred promoters at a time
Source: eLife. 2020 Sep 21;9:e55308. doi: 10.7554/eLife.55308 (PMC7567609; doi:10.7554/eLife.55308)
Supplement: Figure 11—source data 1. [file elife-55308-fig11-data1.xlsx]

## Sheet: Sheet1
pos	info
-115	9.6984e-07
-114	1.86173e-05
-113	-1.06689e-05
-112	2.3819e-05
-111	-2.12565e-05
-110	-4.49749e-05
-109	-0.000409062
-108	6.24183e-05
-107	0.000191765
-106	3.17446e-06
-105	-2.83185e-05
-104	6.09105e-06
-103	6.91753e-07
-102	4.06636e-06
-101	6.50376e-05
-100	-1.88216e-05
-99	-1.82094e-05
-98	0.000177761
-97	7.78932e-07
-96	-0.000135598
-95	5.68439e-05
-94	-4.79887e-06
-93	1.95672e-05
-92	3.95596e-06
-91	-7.31106e-05
-90	-1.82302e-07
-89	0.000102227
-88	0.000171366
-87	0.00012124
-86	-1.29146e-06
-85	2.8868e-07
-84	0.000297252
-83	2.69854e-05
-82	0.000105939
-81	0.000110186
-80	-4.30239e-05
-79	-1.44694e-05
-78	-2.31144e-06
-77	-1.66703e-05
-76	2.5528e-05
-75	2.34171e-05
-74	9.87851e-05
-73	4.09687e-06
-72	-0.000214232
-71	0.000333322
-70	-4.30925e-05
-69	1.50977e-05
-68	-0.000520499
-67	1.51735e-06
-66	0.00163613
-65	1.27083e-05
-64	5.40811e-06
-63	-5.29333e-06
-62	-1.13884e-05
-61	2.64044e-07
-60	-6.36061e-05
-59	-6.75223e-06
-58	0.00262331
-57	0.00343309
-56	0.00172063
-55	0.00134962
-54	0.00178586
-53	0.000625057
-52	0.00200195
-51	0.000733543
-50	-7.24908e-06
-49	1.74984e-05
-48	-6.11335e-05
-47	4.95722e-05
-46	-1.84368e-05
-45	0.000510111
-44	-1.03723e-05
-43	0.000434866
-42	-8.7604e-06
-41	-2.39439e-06
-40	3.21468e-05
-39	0.000131839
-38	-0.000156191
-37	0.00140716
-36	0.00571213
-35	0.00300012
-34	-0.000759508
-33	0.000741065
-32	7.15781e-05
-31	0.000352522
-30	0.000376637
-29	3.34952e-05
-28	-4.89948e-05
-27	1.2802e-07
-26	-7.83584e-05
-25	-5.44861e-05
-24	-4.24859e-07
-23	5.78986e-05
-22	-4.10744e-05
-21	-0.000762242
-20	-0.00026621
-19	0.000155654
-18	-0.000241763
-17	0.000483341
-16	-0.000767693
-15	0.000321336
-14	0.000251469
-13	0.00434963
-12	0.00409916
-11	0.000693309
-10	-0.000358247
-9	-0.00162886
-8	0.00688098
-7	-0.00269723
-6	-2.02267e-05
-5	-0.000156781
-4	1.90656e-05
-3	0.000245453
-2	9.00091e-05
-1	0.000681344
0	1.43345e-05
1	-1.74829e-05
2	-2.60309e-05
3	3.98564e-06
4	-0.00011029
5	2.47418e-07
6	-2.65469e-07
7	0.000328351
8	-4.93774e-06
9	2.63898e-07
10	-2.06589e-06
11	-1.51342e-07
12	-9.20778e-06
13	-2.82865e-06
14	-0.000229245
15	-8.60619e-06
16	-2.43538e-05
17	1.97664e-05
18	0.000105909
19	0.000114422
20	1.47306e-05
21	1.84582e-05
22	-5.17408e-05
23	-0.000161856
24	-2.90395e-06
25	-0.000264992
26	5.18466e-05
27	0.000402079
28	-0.000191253
29	0.000193358
30	-0.000409033
31	3.70272e-06
32	0.000257166
33	-1.3886e-05
34	0.000204759
35	9.95567e-07
36	1.22153e-05
37	0.000159783
38	-0.000123331
39	-3.34924e-06
40	3.48253e-05
41	1.15446e-05
42	-2.59452e-05
43	-3.55688e-06
44	0.000154113
