# Supplementary material for: Deciphering the regulatory genome of Escherichia coli, one hundred promoters at a time
Source: eLife. 2020 Sep 21;9:e55308. doi: 10.7554/eLife.55308 (PMC7567609; doi:10.7554/eLife.55308)
Supplement: Supplementary file 1. — It additionally contains the logic behind the choice of TSS when there are multiple options. [file elife-55308-supp1.xlsx]

## Sheet: 1_TSS
#Table of transcription start sites.
#This file contains the name of each gene, listed TSS, if the transcription occurs 5’ to 3’, and the wild type sequence of the regulatory region.
# additionally, this file has the transcription factors listed in RegulonDB and the Tfs expected to be found in the mutagenized region.
# The reasoning behind selecting the Transcription start site for use in the experiment is also listed.
#In the section below all the gene listing, the construct sequence, with the oligo and barcode is listed.
	name	start_site	reverse or forward	offset	all features listed in regulonDB	Features expected to appear in the mutagenized region.	notes	Reason for choosing TSS
	fdoH	4085867	rev	0	small_RNA_SdhX			TSS cluster as identified from RACE experiments. See Salgado H et al Nucleic Acids Research (2012).
	sdaB	2928035	fwd	0				Computationally predicted start site. See Huerta AM et al. J. Mol. Biol. (2003).
	thiM	2185451	rev	0	thiamine_diphosphate		not in region.	Experimentally determined start site as found in the EcoCyc database. See Mendoza-Vargas et al. PLoS One (2009).
	yedJ	2033449	rev	0				RACE start site from RegulonDB. This is the strongest evidence site for this gene. See Salgado H et al Nucleic Acids Research (2012).
	ykgE	321511	fwd	0				Computationally predicted start site for sigma-70. See Huerta AM et al. J. Mol. Biol. (2003).
	sdiA	1996867	rev	-10	Nac CsrA CsrA		need to check	Experimentally determined start site, p3, is in the middle of regulatory region, as determined by the EcoCyc database. See Yakhnin H et al. J. Bacteriol. (2011).
	yqhC	3155262	rev	1	GlaR		no location.	The start site for this gene was set as 44 base pairs upstream of the gene start, since the intergenic region is small.
	yicI	3836664	rev	0				Experimentally determined TSS for sigma-24. See Rhodius VA et al. PLoS Biol. (2005).
	ybjT	909320	rev	0			part of operon with poxB.	Experimentally determined start site. See Mendoza-Vargas et al. PLoS One (2009).
	mtgA	3350504	rev	-7	ArcA	No known start site.		Offset of 7 bp from RACE TSS on RegulonDB. The offset will move it further upstream from gene start. See Salgado H et al Nucleic Acids Research (2012).
	aphA	4269355	fwd	0			no known start site.	RACE TSS from RegulonDB. See Salgado H et al Nucleic Acids Research (2012).
	bdcR	4474096	fwd	0	GlaR NsrR		GlaR outside region NsrR not known to regulate but is in region.	Computationally predicted start site from RegulonDB. See Huerta AM et al. J. Mol. Biol. (2003).
	yncD	1523276	rev	0				Computationally predicted start site based on the EcoCyc database. See Huerta AM et al. J. Mol. Biol. (2003).
	rumB	897947	fwd	0				Computationally predicted start site based on the EcoCyc database. See Huerta AM et al. J. Mol. Biol. (2003).
	yagH	285350	fwd	0				Nearest computationally predicted sigma-70 start site to gene. See Huerta AM et al. J. Mol. Biol. (2003).
	eco	2303797	fwd	0				Only compuationally predicted sigma-70 start site for this gene. See Huerta AM et al. J. Mol. Biol. (2003).
	yfhG	2690181	rev	0				RACE site TSS. See Salgado H et al Nucleic Acids Research (2012).
	htrB	1116709	rev	0				Experimentally determined TSS. See Karow M & Georgopoulos C, Mol. Microbiol. (1991).
	iap	2876547	fwd	3			cysB normally in region	RACE site TSS from RegulonDB. See Salgado H et al Nucleic Acids Research (2012).
	ygjP	3235915	fwd	0				45 base pairs upstream of start of gene in small intergenic region.
	yedK	2009776	fwd	0				45 base pairs upstream of start of gene in small intergenic region.
	holC	4484273	rev	0				Sigma-32 promoter with experimental evidence, as shown in EcoCyc database. This is the only promoter in the genomic area. See Nonaka G et al. Genes Dev. (2006).
	aegA	2585570	rev	0	CRP		unknown location weak evidence	45 base pairs upstream of start of gene in small intergenic region.
	rapA	63358	rev	0				Sigma-70 TSS with experimental evidence, as shown in the EcoCyc database. This is the closest start site to the gene. See Cabrera JE & Jin DJ, J. Bacteriol. (2001).
	dusC	2230395	rev	0				TSS with experimental evidence. It is the only site in the genomic area. See Raghavan R et al. J. Bacteriol. (2011).
	fdhE	4081359	rev	2			same regulon as fdoH	Race TSS site near the computationally predicted start site, fdhEp1. See Salgado H et al Nucleic Acids Research (2012).
	dnaE_start1	197026	fwd	0				One of two experimentally determined start sites upstream of whole operon. See Dartigalongue C et al. J. Biol. Chem. (2001).
	dnaE_start2	197821	fwd					One of two experimentally determined start sites upstream of whole operon. See Dartigalongue C et al. J. Biol. Chem. (2001).
	ycgB	1237285	rev	0			Lrp in area	Experimentally determined TSS and it is the only start site in region. See Mendoza-Vargas et al. PLoS One (2009).
	yehS	2212241	rev	-15				RACE TSS upstream of whole operon. Offset by 15 bp to be further upstream from gene start. See Salgado H et al Nucleic Acids Research (2012).
	yeiQ	2266214	fwd	0				Experimentally determined start site next to gene start. See Salgado H et al Nucleic Acids Research (2012).
	ydhO	1734357	fwd	0	NsrR		low evidence	Computationally predicted start site. It is the only site in the genomic area. See Huerta AM et al. J. Mol. Biol. (2003).
	hslU	4122354	rev	0				Sigma-32 site with experimental evidence, as shown in the EcoCyc database. This is the only reported start site in the genomic area. See Nonaka G et al. Genes Dev. (2006).
	ymgG	1223097	rev	0				RACE site from RegulonDB. Only start site in the genomic area. See Salgado H et al Nucleic Acids Research (2012).
	rlmA	1907086	rev	0				Computationally predicted site. Only site in genomic area. See Huerta AM et al. J. Mol. Biol. (2003).
	modE	794644	rev	0			Rob_MarA_SoxS in area.	TSS set at gene start in small intergenic region. This will catch the whole intergenic region.
	ycbZ	1018330	rev	0				RACE site (cluster) that will also catch the other RACE TSS in the mutated region. See Salgado H et al Nucleic Acids Research (2012).
	yajL	443748	rev	0				Computationally predicted TSS that was designed to also include the RACE TSS in the mutated area. See Huerta AM et al. J. Mol. Biol. (2003).
	yecE	1950760	fwd	0				Computationally predicted TSS that was designed to also catch the other computationally predicted site near the gene in the intergenic region. See Huerta AM et al. J. Mol. Biol. (2003).
	ybiP	852626	rev	0				Only computationally predicted site in the genomic area. See Huerta AM et al. J. Mol. Biol. (2003).
	ybjL	889945	rev	-7				Only RACE TSS in the genomic area. See Salgado H et al Nucleic Acids Research (2012).
	ygdH	2926272	fwd	-158	Nac		location unknown	Only RACE TSS upstream of this gene. See Salgado H et al Nucleic Acids Research (2012).
	pcm	2870686	rev	0				Experimentally validated site, and the only site for the operon as seen in the EcoCyc database.
	rcsF	220022	rev	0				Only RACE TSS upstream of the gene. See Salgado H et al Nucleic Acids Research (2012).
	sbcB	2082728	fwd	0				Only experimentally determined site in the genomic area. See Phillips GJ et al. J. Biol. Chem. (1987).
	ygeR	2999918	rev	0				Only RACE TSS upstream of the gene in this genomic area. See Salgado H et al Nucleic Acids Research (2012).
	mscK	486492	fwd	0				Only experimentally validated TSS for this gene. See Mendoza-Vargas et al. PLoS One (2009).
	mscS	3069871	rev	0				See Mendoza-Vargas et al. PLoS One (2009).	2009
	ynaI	1395973	rev	0				Only experimentally validated TSS for the gene in this genomic area. See Mendoza-Vargas et al. PLoS One (2009).
	ybdG	604684	rev	0				Only RACE TSS upstream of gene. See Salgado H et al Nucleic Acids Research (2012).
	hicB	1509221	fwd	0	CRP HicB		CRP low evidence HicB out of range	One of two experimentally validated start sites. This was designed to include known TF sites in the mutated region. See Jorgensen MG et al. J. Bacteriol. (2009).
	arcB	3353049	rev	0				Only experimentally validated site in the genomic area. See Aiso T & Ohki R. Genes Cells (2003).
	minC	1226139	rev	0				Nearest RACE TSS to gene. It was designed to also include the other RACE site in the mutated region. See Salgado H et al Nucleic Acids Research (2012).
	ybeZ	693469	rev	0				Only experimentally validated TSS for this gene (sigma-32). See Nonaka G et al. Genes Dev. (2006).
	ydjA	1848700	rev	0				Only experimentally validated TSS for this gene. See Sawers G et al. J. Bacteriol. (1991).
	yggW	3096620	fwd	0				Only experimentally validated TSS for this gene (Sigma 32). See Nonaka G et al. Genes Dev. (2006).
	acuI	3403446	fwd	0				Only computationally predicted sigma-70 site for this gene. See Huerta AM et al. J. Mol. Biol. (2003).
	yehU	2214673	rev	0				Only RACE TSS site for this gene. See Salgado H et al Nucleic Acids Research (2012).
	yehT	2212969	rev	0			part of operon with yehU	Only RACE TSS for this gene. See Salgado H et al Nucleic Acids Research (2012).
	ybiO	845736	rev	0				Only RACE TSS for this gene. See Salgado H et al Nucleic Acids Research (2012).
	mscL	3438001	fwd	0				Only experimentally validated TSS for this gene. See Merino E & Yanofsky C, Trends Genet. (2005).
	zapB	4118427	fwd	0				This gene has many RACE TSS upstream of gene. We chose the one that is furthest upstream. See Salgado H et al Nucleic Acids Research (2012).
	WaaA-coaD	3808516	fwd	0				One of two experimentally validated sites for this gene. This start site is nearest site to the gene. See Salgado H et al Nucleic Acids Research (2012).
	coaA	4175107	rev	0				Only experimentally validated TSS for this gene. Song WJ & Jackowski S, J. Bacteriol. (1992).
	yjjJ	4621716	fwd	0				One of two computationally predicted start sites. This one is closer to the start of gene. See Huerta AM et al. J. Mol. Biol. (2003).
	groSL	4370616	fwd	0				Only experimentally validated site upstream of the whole operon. See Wang Y & deHaseth PL. J. Bacteriol. (2003).
	pyrLBI	4472553	rev	0				One of two experimentally validated TSS. This start site is closer to the gene. See Donahue JP & Turnbough CL Jr. J. Biol. Chem. (1994).
	rplKAJL-rpoBC	4178354	fwd	0	RplA		outside range	Only experimentally validated TSS for this gene. See Post LE et al. PNAS (1979).
	yodB	2042294	fwd	-14	GlaR		unknown location probably outside region	Computationally predicted start site. It is one of several, but we selected this one because it is in the center of three sites. Our aim is to catch all three predicted start sites in the mutated region. See Huerta AM et al. J. Mol. Biol. (2003).
	atpIBEFHAGDC	3922525	rev	0				Only experimentally validated TSS for this gene. See Jones HM. et al. J. Bacteriol. (1983).
	msyB	1114213	rev	0				Only experimentally validated TSS for this gene. See Lacour S & Landini P, J. Bacteriol. (2004).
	ndk	2644913	rev	0				Only RACE TSS for this gene. See Salgado H et al Nucleic Acids Research (2012).
	thrLABC	148	fwd	0				Only experimentally determined start site for this gene. Gardner JF, J. Biol. Chem. (1982).
	tig	454993	fwd	-129				One of two experimentally validated TSS for this gene. This site is also close to several other RACE TSS. See Mendoza-Vargas et al. PLoS One (2009).
	tff-rpsB-tsf	189712	fwd	0	rpsB		outside region MarA_Rob_Sox shows no evidence but in region	Only experimentally validated site for the gene. Aseev LV et al. RNA (2008).
	maoP	3948058	fwd	-28	HdfR		unknown location	One of two RACE TSS' for this gene. Both TSS are included within the mutated region, but this one is the closer to the gene of the two. See Salgado H et al Nucleic Acids Research (2012).
	poxB	911076	rev	0	MarA SoxS Cra		all low evidence unknown location Cra	Only experimentally validated TSS for this gene. See Salgado H et al Nucleic Acids Research (2012).
	rspA	1655186	rev	-45	YdfH CRP	YdfH CRP	45 Base pairs upstream of gene start.
	mscM	4390638	rev	0	CpxR		low evidence outside of region	Only experimentally validated start site for this operon with mscM on it. See Rezuchova B. et al. FEMS Microbiol. Letters (2003).
	arcA	4640508	rev	0	FNR		low evidence	The TSS is one of many, but this one is expected to be activated by FNR. See Compan I & Touati D, Mol. Microbiol. (1994).
	tar	1972716	rev	0	FNR		low evidence no known location	Only experimentally validated TSS for this gene (sigma-28). See Ide N et al. Genes Genet. Syst. (1999).
	dpiBA	652172	fwd	0	DcuRx2 NarL	DcuRx2	NarL low evidence DcuR need fumarte or succinate to see. Second start site has many more binding sites including DpiA x 3 ArcA NarL FNR CRP	One of two experimentally validated start sites. This one is nearer to the gene start. See Mandin P and Gottesman S, Mol. Microbiol. (2009).
	araAB	70075	rev	0	AraCx5 CRP	AraCx2 CRP	3 AraC outside region.	Only experimentally validated TSS for this gene. See Lisser S & Margalit H, Nucleic Acids Res. (1993).
	araC	70241	fwd	0	AraCx5 CRP XylRx2	AraCx5 CRP XylRx2		Only experimentally validated TSS for this gene. See Wallace RG et al. Gene (1980).
	xylF	3731069	fwd	0	CRP Fisx3 XylRx2	XylRx2	low evidence CRP Fisx3	Only experimentally validated TSS for this gene. See Song S & Park C, J. Bacteriol. (1997).
	xylA	3730807	rev	0	XylRx2 AraCx2 CRP	XylRx2	CRP low evidence AraC induced away	See Song S & Park C, J. Bacteriol. (1997).
	dicA	1647934	fwd	0	DicA	DicA		The start of the gene is used. The mutated region will cover entire intergenic region.
	dicC	1647876	rev	0	DicA	DicA		Only experimentally validated start site for this gene. See Yun SH et al. PLoS One (2012).
	dicB	1649597	fwd	0	DicA		unknown location	Only computationally predicted start site for this gene. See Huerta AM et al. J. Mol. Biol. (2003).
	ompR	3536707	rev	0	IHFx3 CRP omrR_A_B small RNA	IHFx3 CRP	small rnas out of range	One of four experimentally predicted sites. This one is known to be regulated by the target TFs. See Matsuyama S et al. J. Bacteriol. (1986).
	xapAB	2524910	rev	0	xapRx2	xapR	one xapR out of range and both low evidence	Only experimentally validated TSS for this gene. See Seeger C et al. J. Bacteriol. (1995).
	ilvC	3957912	fwd	0	IlvYx2	IlvYx2	outside of proper growth condition	Only experimentally validated TSS for this gene. See Opel ML et al. Mol. Microbiol. (2001).
	asnA	3927129	fwd	0	AsnCx4		all low evidence 2 Nac in area but no evidence of regulation	Only experimentally validated TSS for this gene. See Kolling R & Lother H, J. Bacteriol. (1985).
	idnK	4494597	fwd	0	GntRx3 idnR CRP		all low evidence	Only experimentally validated TSS for this gene. See Bausch C et al. J. Bacteriol. (2004).
	dinJ	246533	rev	0	DinJ-YafQ LexA		both outside of region	Only RACE TSS for this gene. See Salgado H et al Nucleic Acids Research (2012).
	yjiY	4591367	rev	0	BtsR CRP	BtsR	CRP outside of area btsR activated at stationary and with pyruvate	Only experimentally validated TSS for this gene. See Kraxenberger T et al. J. Bacteriol. (2012).
	motAB-cheAW	1977302	rev	0	CpxR	cpxR	sigma 28	Only computationally predicted TSS for this gene (sigma-28). See Mirel DB et al. J. Bacteriol. (1992).
	ftsK	933138	fwd	0	LexA	LexA		One of two experimentally validated TSS for this gene. This start site is known to be regulated by LexA. See Lewis LK et al. J. Bacteriol. (1992).
	cra	87969	fwd	22	PhoB		low evidence no known location	Only RACE TSS for this gene. See Salgado H et al Nucleic Acids Research (2012).
	uvrD	3997907	fwd	0	LexA		low evidence	One of two experimentally validated TSS this gene. This one is known to be regulated by LexA. Arthur HM et al. J. Bacteriol. (1987).
	adiY	4338042	rev	0	H-NS SgrS small RNA		unknown location SgrS outside region	Only experimentally validated start site for this gene. Stim-Herndon KP et al. Microbiology (1996).
	znuCB	1942634	fwd	0	Zur OxyR	Zur	OxyR needs hydrogen peroxide or other oxidators to regulate	Only experimentally validated TSS for the gene. See Outten CE & O'Halloran TV, Science (2001).
	znuA	1942661	rev	0	Zur OxyR	Zur	OxyR outside of region	Only computationally predicted site. See Huerta AM et al. J. Mol. Biol. (2003).
	zupT	3182433	fwd	0				Only experimentally validated TSS for this gene. See Raghavan R et al. J. Bacteriol. (2011).
	pitA	3637612	fwd	0	FNR		low evidence no known location	Only experimentally valiated TSS for this gene. See Mendoza-Vargas et al. PLoS One (2009).
	ecnB	4376509	fwd	0	OmpR		low evidence	Only experimentally determined TSS for this gene. See Bishop RE et al. J. Mol. Biol. (1998).
	leuABCD	83735	rev	0	leuO		No known location low evidence	One of two experimentally determined start sites. This site is closer to the gene. See Stratmann T et al. Mol. Microbiol. (2012).
	rel	1645903	rev
	marR	1619093	fwd	-10
	phnA	4326836	rev	0
	dcm	2032352	rev	0
	amiC	2949066	rev	0
	mutM	3811175	rev	0
	ybjX	919103	rev	0
	rhle	830783	fwd	0
				0
