# Supplementary material for: Deciphering the regulatory genome of Escherichia coli, one hundred promoters at a time
Source: eLife. 2020 Sep 21;9:e55308. doi: 10.7554/eLife.55308 (PMC7567609; doi:10.7554/eLife.55308)
Supplement: Supplementary file 2. — Additionally, it contains the flanking sequences of the mutated inserts and the barcodes used to label the growth conditions in the Reg-Seq experiment. [file elife-55308-supp2.xlsx]

## Sheet: 2_Primers
#Primers and mutated regions in Reg-Seq
#In the section below all the gene listing, the construct sequence, with the oligo and barcode is listed.
#Additionally primers used in sequencing are listed below.
Construct sequences (mutated oligos, barcodes, and intervening sequences). The 20 N's at the end of the sequence compose the random barcode.
genes
fdoH,sdaB,thiM,yedJ,ykgE,sdiA	TTCGTCTTCACCTCGAGCACGCTTATTCGTGCCGTGTTAT	Mutated Wild Type Sequence		TACTTTTGATTGCTGTGCCCTATTAGGCTTCTCCTCAGCGCTAGTCACTGGCCGTCGTTTTACATGACTGACTGANNNNNNNNNNNNNNNNNNNN
yqhC,yicI,ybjT,mtgA,aphA,bdcR	TTCGTCTTCACCTCGAGCACTTTGCTTCAGTCAGATTCGC	Mutated Wild Type Sequence		GTTCAATCACTGAATCCCGGTATTAGGCTTCTCCTCAGCGCTCCTCACTGGCCGTCGTTTTACATGACTGACTGANNNNNNNNNNNNNNNNNNNN
yncD,rumB,yagH,eco,yfhG,htrB	TTCGTCTTCACCTCGAGCACGTCGAGTCCTATGTAACCGT	Mutated Wild Type Sequence		CAGGGGTCGTCATATCTTCATATTAGGCTTCTCCTCAGCGGGACTCACTGGCCGTCGTTTTACATGACTGACTGANNNNNNNNNNNNNNNNNNNN
iap,ygjP,yedK,holC,aegA,rapA	TTCGTCTTCACCTCGAGCACGTAAGATGGAAGCCGGGATA	Mutated Wild Type Sequence		CACCTCATAGAGCTGTGGAATATTAGGCTTCTCCTCAGCGTCGGTCACTGGCCGTCGTTTTACATGACTGACTGANNNNNNNNNNNNNNNNNNNN
dusC,fdhE,dnaE,ycgB,yehS,yeiQ	TTCGTCTTCACCTCGAGCACGGTGTCGCAACATGATCTAC	Mutated Wild Type Sequence		CGGTTCCTAGTCATGTTTGCTATTAGGCTTCTCCTCAGCGCCAATCACTGGCCGTCGTTTTACATGACTGACTGANNNNNNNNNNNNNNNNNNNN
ydhO,hslU,ymgG,rlmA,modE,ycbZ	TTCGTCTTCACCTCGAGCACGTGCTAAGTCACACTGTTGG	Mutated Wild Type Sequence		TTGTACTAATCTCGTCCCGGTATTAGGCTTCTCCTCAGCGTATCTCACTGGCCGTCGTTTTACATGACTGACTGANNNNNNNNNNNNNNNNNNNN
yajL,yecE,ybiP,ybjL,ygdH,pcm	TTCGTCTTCACCTCGAGCACTCTAAACAGTTAGGCCCAGG	Mutated Wild Type Sequence		TTATGTTCACAACTGGCGTGTATTAGGCTTCTCCTCAGCGGAGTTCACTGGCCGTCGTTTTACATGACTGACTGANNNNNNNNNNNNNNNNNNNN
rcsF,sbcB,ygeR,mscK,mscS,ynaI	TTCGTCTTCACCTCGAGCACGTCTTTATACTTGCCTGCCG	Mutated Wild Type Sequence		TGGAACTGATTTGGCCTTTGTATTAGGCTTCTCCTCAGCGAGTATCACTGGCCGTCGTTTTACATGACTGACTGANNNNNNNNNNNNNNNNNNNN
ybdG,hicB,arcB,minC,ybeZ,ydjA	TTCGTCTTCACCTCGAGCACCACCGCGATCAATACAACTT	Mutated Wild Type Sequence		TATAGTTCCTCCCATGCACCTATTAGGCTTCTCCTCAGCGTTGGTCACTGGCCGTCGTTTTACATGACTGACTGANNNNNNNNNNNNNNNNNNNN
yggW,acuI,yehU,yehT,ybiO,mscL	TTCGTCTTCACCTCGAGCACTTCGGATAGACTCAGGAAGC	Mutated Wild Type Sequence		ACAATAGACAGACCCATGCATATTAGGCTTCTCCTCAGCGGCCTTCACTGGCCGTCGTTTTACATGACTGACTGANNNNNNNNNNNNNNNNNNNN
zapB,waaA-coaD,coaA,yjjJ,groSL,pyrLBI	TTCGTCTTCACCTCGAGCACCCATTGATAGATTCGCTCGC	Mutated Wild Type Sequence		GAGTCGAGCTAGCATAGGAGTATTAGGCTTCTCCTCAGCGAATTTCACTGGCCGTCGTTTTACATGACTGACTGANNNNNNNNNNNNNNNNNNNN
RplKAJL-rpoBC,yodB,atpI,msyB,ndk,thrLABC	TTCGTCTTCACCTCGAGCACTTTTCTACTTTCCGGCTTGC	Mutated Wild Type Sequence		TTGTGGGAGCTTCTTACCATTATTAGGCTTCTCCTCAGCGACAATCACTGGCCGTCGTTTTACATGACTGACTGANNNNNNNNNNNNNNNNNNNN
tig,tff,maoP,poxB,rspA,mscM	TTCGTCTTCACCTCGAGCACATGACTATTGGGGTCGTACC	Mutated Wild Type Sequence		TCGTACGGGAATGACCATAGTATTAGGCTTCTCCTCAGCGTAAATCACTGGCCGTCGTTTTACATGACTGACTGANNNNNNNNNNNNNNNNNNNN
arcA,tar,dpiBA,araAB,araC,xylF	TTCGTCTTCACCTCGAGCACTCGACAATAGTTGAGCCCTT	Mutated Wild Type Sequence		AGACACAACGTAGCCGATTATATTAGGCTTCTCCTCAGCGCGGTTCACTGGCCGTCGTTTTACATGACTGACTGANNNNNNNNNNNNNNNNNNNN
xylA,dicA,dicC,dicB,ompR,xapAB	TTCGTCTTCACCTCGAGCACGAGCCATGTGAAATGTGTGT	Mutated Wild Type Sequence		CGGACTAAAGGATCGAGTCATATTAGGCTTCTCCTCAGCGGCCATCACTGGCCGTCGTTTTACATGACTGACTGANNNNNNNNNNNNNNNNNNNN
ilvC,asnA,idnK,dinJ,yjiY,motAB	TTCGTCTTCACCTCGAGCACCGTATACGTAAGGGTTCCGA	Mutated Wild Type Sequence		CATCGGATAACACAAAGCGTTATTAGGCTTCTCCTCAGCGGGCCTCACTGGCCGTCGTTTTACATGACTGACTGANNNNNNNNNNNNNNNNNNNN
ftsK,cra,uvrD,adiY,znuCB,znuA	TTCGTCTTCACCTCGAGCACTTATGATGTCCGGATACCCG	Mutated Wild Type Sequence		GATGTATACTCCACCGTGGTTATTAGGCTTCTCCTCAGCGCACCTCACTGGCCGTCGTTTTACATGACTGACTGANNNNNNNNNNNNNNNNNNNN
zupT,pitA,ecnB,leuABCD	TTCGTCTTCACCTCGAGCACTCTTAGAAATCCACGGGTCC	Mutated Wild Type Sequence		TGAGATATGTACCTGGTGCCTATTAGGCTTCTCCTCAGCGATTGTCACTGGCCGTCGTTTTACATGACTGACTGANNNNNNNNNNNNNNNNNNNN
Primer sequences for sequencing
Abbreviated name	Name	Sequence										Notes
mRNA_rev	Specific primer for reverse transcription step	GCAGGGGATAATATTGCCCA
fwd_sequencing	Forward Primer for amplification before sequencing	AATGATACGGCGACCACCGAGATCT ACACTCTTTCCCTACACG ACGCTCTTCCGATCT NNNN TATTAGGCTTCTCCTCAGCG										The four N's compose an inline barcode that identify the growth condition, the specific growth conditions are listed in the sheet labeled 'Growth Condition Barcodes'
rev_sequencing	Reverse Primer for amplification before sequencing	AAGCAGAAGACGGCATACGAGATCGGT CTCGGCATTCCTGCT GAACCGCTCTTCCGATCT NNNN GCAGGGGATAATATTGCCCA										The four N's compose an inline barcode that identify the growth condition, the specific growth conditions are listed in the sheet labeled 'Growth Condition Barcodes'
fwd_oligo_101	Fwd Primer for amplifying oligo pool for creating construct (group 101)	TTCGTCTTCACCTCGAGCACGCTTATTCGTGCCGTGTTAT
fwd_oligo_102	Fwd Primer for amplifying oligo pool for creating construct (group 102)	TTCGTCTTCACCTCGAGCACTTTGCTTCAGTCAGATTCGC
fwd_oligo_103	Fwd Primer for amplifying oligo pool for creating construct (group 103)	TTCGTCTTCACCTCGAGCACGTCGAGTCCTATGTAACCGT
fwd_oligo_104	Fwd Primer for amplifying oligo pool for creating construct (group 104)	TTCGTCTTCACCTCGAGCACGTAAGATGGAAGCCGGGATA
fwd_oligo_105	Fwd Primer for amplifying oligo pool for creating construct (group 105)	TTCGTCTTCACCTCGAGCACGGTGTCGCAACATGATCTAC
fwd_oligo_106	Fwd Primer for amplifying oligo pool for creating construct (group 106)	TTCGTCTTCACCTCGAGCACGTGCTAAGTCACACTGTTGG
fwd_oligo_107	Fwd Primer for amplifying oligo pool for creating construct (group 107)	TTCGTCTTCACCTCGAGCACTCTAAACAGTTAGGCCCAGG
fwd_oligo_108	Fwd Primer for amplifying oligo pool for creating construct (group 108)	TTCGTCTTCACCTCGAGCACGTCTTTATACTTGCCTGCCG
fwd_oligo_109	Fwd Primer for amplifying oligo pool for creating construct (group 109)	TTCGTCTTCACCTCGAGCACCACCGCGATCAATACAACTT
fwd_oligo_110	Fwd Primer for amplifying oligo pool for creating construct (group 110)	TTCGTCTTCACCTCGAGCACTTCGGATAGACTCAGGAAGC
fwd_oligo_111	Fwd Primer for amplifying oligo pool for creating construct (group 111)	TTCGTCTTCACCTCGAGCACCCATTGATAGATTCGCTCGC
fwd_oligo_112	Fwd Primer for amplifying oligo pool for creating construct (group 112)	TTCGTCTTCACCTCGAGCACTTTTCTACTTTCCGGCTTGC
fwd_oligo_113	Fwd Primer for amplifying oligo pool for creating construct (group 113)	TTCGTCTTCACCTCGAGCACATGACTATTGGGGTCGTACC
fwd_oligo_114	Fwd Primer for amplifying oligo pool for creating construct (group 114)	TTCGTCTTCACCTCGAGCACTCGACAATAGTTGAGCCCTT
fwd_oligo_115	Fwd Primer for amplifying oligo pool for creating construct (group 115)	TTCGTCTTCACCTCGAGCACGAGCCATGTGAAATGTGTGT
fwd_oligo_116	Fwd Primer for amplifying oligo pool for creating construct (group 116)	TTCGTCTTCACCTCGAGCACCGTATACGTAAGGGTTCCGA
fwd_oligo_117	Fwd Primer for amplifying oligo pool for creating construct (group 117)	TTCGTCTTCACCTCGAGCACTTATGATGTCCGGATACCCG
fwd_oligo_118	Fwd Primer for amplifying oligo pool for creating construct (group 118)	TTCGTCTTCACCTCGAGCACTCTTAGAAATCCACGGGTCC
rev_oligo_101	Rev Primer for amplifying oligo pool for creating construct (group 101)	TGTAAAACGACGGCCAGTGACTAGCGCTGAGGAGAAGCCTAATAGGGCACAGCAATCAAAAGTA
rev_oligo_102	Rev Primer for amplifying oligo pool for creating construct (group 102)	TGTAAAACGACGGCCAGTGAGGAGCGCTGAGGAGAAGCCTAATACCGGGATTCAGTGATTGAAC
rev_oligo_103	Rev Primer for amplifying oligo pool for creating construct (group 103)	TGTAAAACGACGGCCAGTGAGTCCCGCTGAGGAGAAGCCTAATATGAAGATATGACGACCCCTG
rev_oligo_104	Rev Primer for amplifying oligo pool for creating construct (group 104)	TGTAAAACGACGGCCAGTGACCGACGCTGAGGAGAAGCCTAATATTCCACAGCTCTATGAGGTG
rev_oligo_105	Rev Primer for amplifying oligo pool for creating construct (group 105)	TGTAAAACGACGGCCAGTGATTGGCGCTGAGGAGAAGCCTAATAGCAAACATGACTAGGAACCG
rev_oligo_106	Rev Primer for amplifying oligo pool for creating construct (group 106)	TGTAAAACGACGGCCAGTGAGATACGCTGAGGAGAAGCCTAATACCGGGACGAGATTAGTACAA
rev_oligo_107	Rev Primer for amplifying oligo pool for creating construct (group 107)	TGTAAAACGACGGCCAGTGAACTCCGCTGAGGAGAAGCCTAATACACGCCAGTTGTGAACATAA
rev_oligo_108	Rev Primer for amplifying oligo pool for creating construct (group 108)	TGTAAAACGACGGCCAGTGATACTCGCTGAGGAGAAGCCTAATACAAAGGCCAAATCAGTTCCA
rev_oligo_109	Rev Primer for amplifying oligo pool for creating construct (group 109)	TGTAAAACGACGGCCAGTGACCAACGCTGAGGAGAAGCCTAATAGGTGCATGGGAGGAACTATA
rev_oligo_110	Rev Primer for amplifying oligo pool for creating construct (group 110)	TGTAAAACGACGGCCAGTGAAGGCCGCTGAGGAGAAGCCTAATATGCATGGGTCTGTCTATTGT
rev_oligo_111	Rev Primer for amplifying oligo pool for creating construct (group 111)	TGTAAAACGACGGCCAGTGAAATTCGCTGAGGAGAAGCCTAATACTCCTATGCTAGCTCGACTC
rev_oligo_112	Rev Primer for amplifying oligo pool for creating construct (group 112)	TGTAAAACGACGGCCAGTGATTGTCGCTGAGGAGAAGCCTAATAATGGTAAGAAGCTCCCACAA
rev_oligo_113	Rev Primer for amplifying oligo pool for creating construct (group 113)	TGTAAAACGACGGCCAGTGATTTACGCTGAGGAGAAGCCTAATACTATGGTCATTCCCGTACGA
rev_oligo_114	Rev Primer for amplifying oligo pool for creating construct (group 114)	TGTAAAACGACGGCCAGTGAACCGCGCTGAGGAGAAGCCTAATATAATCGGCTACGTTGTGTCT
rev_oligo_115	Rev Primer for amplifying oligo pool for creating construct (group 115)	TGTAAAACGACGGCCAGTGATGGCCGCTGAGGAGAAGCCTAATATGACTCGATCCTTTAGTCCG
rev_oligo_116	Rev Primer for amplifying oligo pool for creating construct (group 116)	TGTAAAACGACGGCCAGTGAGGCCCGCTGAGGAGAAGCCTAATAACGCTTTGTGTTATCCGATG
rev_oligo_117	Rev Primer for amplifying oligo pool for creating construct (group 117)	TGTAAAACGACGGCCAGTGAGGTGCGCTGAGGAGAAGCCTAATAACCACGGTGGAGTATACATC
rev_oligo_118	Rev Primer for amplifying oligo pool for creating construct (group 118)	TGTAAAACGACGGCCAGTGACAATCGCTGAGGAGAAGCCTAATAGGCACCAGGTACATATCTCA

## Sheet: 4_Growth Condition Barcodes
#barcode numbers are defined below
Date	Growth	Barcode RNA	Barcode DNA
2020/01/10	Delta arcA	97	101
2020/01/10	Delta lrhA	94	99
2019/09/06	Tre	102	101
2019/09/06	0cAMP	94	103
2019/09/06	500cAMP	106	104
2019/09/18	delta hdfR	101	99
2019/09/18	delta asnC	95	100
2019/09/18	delta nhaR	106	107
2019/09/18	delta arcA	94	108
2019/09/18	delta deoR	96	103
2019/09/18	delta glpR	105	104
2019/08/02	Anaerobic	94	95
2019/08/02	delta YieP	97	104
2019/08/02	Iron	106	105
2019/07/16	M9	98	95
2019/07/16	LB	97	101
2019/07/16	heat shock	96	105
2019/06/06	metal	97	95
2019/06/06	xanthosine	98	101
2019/06/06	xylose arabinose	96	105
2019/02/23	arabinose	97	99
2019/02/23	Sodium Salicylate	98	108
Barcode number	Barcode Nucleotides
94	GACC
95	CAGT
96	TCTA
97	AGAG
98	GCAT
99	CTTA
100	TAGC
101	CAAG
102	GTAC
103	TGAA
104	TCGT
105	ATGC
106	GTCA
107	CTCA
108	AGTA
