# Supplementary material for: Deciphering the regulatory genome of Escherichia coli, one hundred promoters at a time
Source: eLife. 2020 Sep 21;9:e55308. doi: 10.7554/eLife.55308 (PMC7567609; doi:10.7554/eLife.55308)
Supplement: Supplementary file 3. — The starting and ending base pairs for each binding site, and whether the transcription factor acts as an activator or repressor are listed. [file elife-55308-supp3.xlsx]

## Sheet: 3_TF_binding_sites
#Transcription factor binding locations identified by RegSeq.
#All sites shown here have either been identified by the automated binding site algorithm or have additional evidence (Mass spec, bioinformatic, etc.) for their presence.
#Some large sites have been manually divided into two sites, and if there are multiple binding partners to one location, the site is not listed multiple times.
#Start and end locations are given with respect to the presumed TSS locations (listed in Supplementary Table 1).
#Some start and end locations have been adjusted manually, automatically determined edges can be found in the other tabs.
gene	start	end	type	identity
thiM	-12	4	repressor
idnK	-48	-27	repressor	YgbI
ybeZ	15	29	repressor
dgoR	-50	-30	activator	CRP
dgoR	-37	-28	repressor	DgoR
WaaA-coaD	-53	-39	activator
dinJ	5	14	repressor
mscM	20	36	repressor
mscS	-23	-14	activator
ycbZ	-39	-18	activator
marR	-84	-65	activator	MarA
marR	-34	-24	repressor	MarR
marR	-14	14	repressor	MarR
ybiO	1	21	repressor
tig	-15	1	repressor	GlpR
iap	3	29	activator
iap	-28	-13	repressor
iap	22	39	repressor
dcm	-15	-5	repressor
yehU	-50	-25	activator	FNR
ygjP	-61	-46	activator
znuA	8	29	repressor	Zur
ybjL	-87	-78	repressor
ybjL	-20	-2	repressor
ybjL	3	13	repressor
dicC	-13	10	repressor	DicA
phnA	-36	-22	repressor
ymgG	-56	-31	activator
ymgG	-111	-97	repressor
maoP	-100	-55	activator	HdfR
maoP	-55	-35	activator	PhoP
maoP	-25	-11	repressor	GlpR
lac	-74	-50	activator	CRP
rapA	-34	11	repressor	GlpR
ykgE	-102	-80	activator	FNR
ykgE	-45	-16	repressor	YieP
pcm	-60	-44	repressor
pcm	-15	-4	repressor
yedJ	-40	-12	repressor
ydjA	-10	5	repressor
ilvC	-69	-38	activator
ilvC	-35	-23	repressor	IlvY
ilvC	-15	0	repressor
znuCB	-18	0	repressor	Zur
rhlE	-21	-5	repressor	GlpR
thrLABC	-57	-41	activator
mutM	-23	-9	repressor
arcA	-99	-63	activator	FNR
arcA	-64	-56	repressor	CpxR
coaA	-37	1	repressor
aphA	-71	-30	activator	FNR
aphA	-73	-62	repressor	DeoR
aphA	-21	1	repressor
ompR	-113	-94	repressor	IHF
ompR	-56	-25	repressor	IHF
ompR	-1	13	repressor	IHF
fdhE	-71	-48	activator	FNR
fdhE	-48	-33	activator	ArcA
ftsK	-8	4	repressor	LexA
araC	-47	-27	repressor
sdiA	-66	-41	repressor
ybjX	-90	-72	activator	PhoP
ybjX	-41	-25	activator	PhoP
ybjX	-95	-70	repressor	HNS/StpA
xylA	-88	-71	activator	CRP
xylA	-71	-55	activator	XylR
xylA	-55	-21	activator	XylR
yeiQ	-77	-51	activator	FNR
yehS	-4	5	activator
yedK	-14	27	repressor
dusC	-35	-20	repressor
yecE	-15	5	repressor
uvrD	6	14	repressor	LexA
rspA	-57	-30	activator	CRP
rspA	-28	2	repressor	YdfH
leuABCD	-18	1	repressor	YgbI
tff-rpsB-tsf	-8	7	repressor	GlpR
groSL	5	18	activator
araAB	-102	-82	activator	CRP
araAB	-76	-56	activator	AraC
araAB	-51	-32	activator	AraC
yicI	-112	-95	activator
yicI	-65	-40	activator
yicI	-35	-16	activator
rel	-10	16	repressor	RelBE, RelB
rcsF	-71	-53	activator
bdcR	-27	-4	repressor	NsrR
xylF	-78	-55	activator	XylR
xylF	-50	-27	activator	XylR
yjjJ	-24	18	repressor	MarA
yjjJ	30	45	repressor

## Sheet: 5_TF_binding_sites_auto_merged
#Transcription factor binding locations identified by RegSeq. The edges of sites are found by merging the sites sound in all growth conditions.
#All sites shown here have either been identified by the automated binding site algorithm or have additional evidence (Mass spec, bioinformatic, etc.) for their presence.
#Some large sites have been manually divided into two sites, and if there are multiple binding partners to one location, the site is not listed multiple times.
#Start and end locations are given with respect to the presumed TSS locations (listed in Supplementary Table 1).
gene	start	end	type	identity
thiM	-12	4	repressor
idnK	-48	-27	repressor	YgbI
ybeZ	15	29	repressor
dgoR	-57	-50	activator	CRP
dgoR	-44	-85	repressor	DgoR
WaaA-coaD	-53	-39	activator
dinJ	5	14	repressor
mscM	20	29	repressor
mscS	-23	-14	activator
ycbZ	-39	-18	activator
marR	-84	-65	activator	MarA
marR	-34	-24	repressor	MarR
marR	-14	14	repressor	MarR
ybiO	-11	21	repressor
tig	-15	1	repressor	GlpR
iap	3	29	activator
iap	-28	-13	repressor
iap	22	29	repressor
dcm	-15	-5	repressor
yehU	-62	-25	activator	FNR
ygjP	-61	-46	activator
znuA	8	29	repressor	Zur
ybjL	-87	-78	repressor
ybjL	-20	-2	repressor
ybjL	3	13	repressor
dicC	-13	10	repressor	DicA
phnA	-36	-22	repressor
ymgG	-56	-31	activator
ymgG	-111	-97	repressor
maoP	-100	-55	activator	HdfR
maoP	-55	-35	activator	PhoP
maoP	-25	-11	repressor	GlpR
lac	-74	-50	activator	CRP
rapA	-34	11	repressor	GlpR
ykgE	-102	-80	activator	FNR
ykgE	-45	-16	repressor	YieP
pcm	-60	-34	repressor
pcm	-15	-10	repressor
yedJ	-40	-12	repressor
ydjA	-21	5	repressor
ilvC	-75	-28	activator
ilvC	-35	0	repressor	IlvY
znuCB	-18	0	repressor	Zur
rhlE	-21	-5	repressor	GlpR
thrLABC	-57	-41	activator
mutM	-23	-9	repressor
arcA	-99	-63	activator	FNR
arcA	-64	-56	repressor	CpxR
coaA	-37	1	repressor
aphA	-71	-30	activator	FNR
aphA	-73	-62	repressor	DeoR
aphA	-21	1	repressor
ompR	-113	-94	repressor	IHF
ompR	-56	-25	repressor	IHF
ompR	-1	13	repressor	IHF
fdhE	-71	-48	activator	FNR
fdhE	-48	-33	activator	ArcA
ftsK	-8	4	repressor	LexA
araC	-114	-98	activator
araC	-93	-86	repressor
araC	-47	-27	repressor
sdiA	-66	-41	repressor
ybjX	-90	-72	activator	PhoP
ybjX	-41	-25	activator	PhoP
ybjX	-95	-70	repressor	HNS/StpA
xylA	-88	-55	activator	XylR
xylA	-55	-21	activator	XylR
yeiQ	-77	-51	activator	FNR
yehS	-4	5	activator
yedK	-14	27	repressor
dusC	-43	-16	repressor
yecE	-35	12	repressor
uvrD	6	14	repressor	LexA
rspA	-57	-18	activator	CRP
rspA	-28	2	repressor	YdfH
leuABCD	-18	14	repressor	YgbI
tff-rpsB-tsf	-8	7	repressor	GlpR
groSL	5	18	activator
araAB	-102	-82	activator	CRP
araAB	-76	-56	activator	AraC
araAB	-51	-32	activator	AraC
yicI	-112	-95	activator
yicI	-65	-57	activator
yicI	-43	-16	activator
rel	-10	16	repressor	RelBE, RelB
rcsF	-71	-53	activator
bdcR	-27	1	repressor	NsrR
xylF	-78	-55	activator	XylR
xylF	-50	-27	activator	XylR
yjjJ	-24	18	repressor	MarA
yjjJ	30	45	repressor

## Sheet: 6_growth_merged_output
#This file contains Iron supplementatures that were identified by the automatic binding site algorithm described in the Methods section of the paper.
#-10 indicates an RNAP sigma 70 minus 10 region, -35 indicates an RNAP sigma 70 minus -35 region.
#Regions that had 3 or Iron supplementwer binding positions that had mutual information higher than the threshold (0.00025 bits) were removed from the file contained in the tab "all identified regions"
#Nearby regions (within 4 base pairs) have been merged together as compared to the tab "all identified regions"
#Energy matrices for all these identified sites can be found in the github associated with RegSeq.
	gene	growth	start	end	type	RNAP
0	ynaI	heat shock	-14	-7	activator	-10
0	ynaI	Iron supplement	-36	-32	activator	-35
1	ynaI	Iron supplement	-16	1	activator	-10
0	ynaI	LB	-48	-6	activator	RNAP
0	ynaI	Anaerobic growth	-48	-7	activator	RNAP
0	ynaI	Trehalose growth	-44	-6	activator	RNAP
0	ynaI	Zinc growth	-34	-7	activator	RNAP
0	ynaI	Xylose Arabinose growth	-36	-7	activator	RNAP
0	ynaI	Xanthosine growth	-39	1	activator	RNAP
0	yehT	heat shock	-18	-7	activator	-10
0	yehT	Iron supplement	-18	-7	activator	-10
1	yehT	Iron supplement	5	15	activator	-10
0	yehT	LB	-18	-7	activator	-10
0	yehT	Trehalose growth	-46	-33	activator	-35
0	yehT	Zinc growth	-18	1	activator	-10
0	yehT	Xylose Arabinose growth	-18	2	activator	-10
0	ycgB	heat shock	-27	-6	activator	-10
0	ycgB	M9	-17	2	activator	-10
0	ycgB	Zinc growth	-20	-7	activator	-10
0	ycgB	Xylose Arabinose growth	-13	-7	activator	-10
0	xylF	Trehalose growth	-32	-20	activator	-10
0	xylF	Zinc growth	-37	-11	activator	RNAP
0	xylF	Xylose Arabinose growth	-78	-55	activator	TF
0	xylF	Xylose Arabinose growth	-50	-27	activator	TF
0	aegA	M9	-75	-64	activator	-10
1	aegA	M9	-6	2	activator	-10
0	aegA	Anaerobic growth	-34	-21	activator	-35
0	aegA	Xylose Arabinose growth	-13	6	activator	-10
0	sdiA	heat shock	-63	-48	activator	-10
0	sdiA	Iron supplement	-83	-71	activator	-35
1	sdiA	Iron supplement	-66	-56	repressor	TF
0	sdiA	LB	-79	-48	activator	RNAP
1	sdiA	LB	-67	-30	repressor	TRUE
0	sdiA	Anaerobic growth	-85	-37	activator	RNAP
1	sdiA	Anaerobic growth	-60	-41	repressor	TF
0	sdiA	Zinc growth	-79	-72	activator	-35
1	sdiA	Zinc growth	-63	-48	activator	-10
2	sdiA	Zinc growth	-59	-41	repressor	TF
0	sdiA	Xylose Arabinose growth	-79	-72	activator	-35
1	sdiA	Xylose Arabinose growth	-63	-48	activator	-10
2	sdiA	Xylose Arabinose growth	-60	-41	repressor	-10
0	sdiA	Xanthosine growth	-83	-72	activator	-35
1	sdiA	Xanthosine growth	-62	-48	activator	-10
3	sdiA	Xanthosine growth	-59	-56	repressor	TF
0	groSL	heat shock	-52	-1	activator	RNAP
0	groSL	Iron supplement	-20	-6	activator	-10
1	groSL	Iron supplement	9	22	activator	-10
0	groSL	M9	23	29	activator	-10
0	groSL	Anaerobic growth	-46	-33	activator	RNAP
1	groSL	Anaerobic growth	-17	-6	activator	RNAP
2	groSL	Anaerobic growth	10	25	activator	-10
0	groSL	phoP	-41	-34	activator	-35
1	groSL	phoP	-17	-1	activator	-10
2	groSL	phoP	8	18	activator	TF
0	groSL	Xylose Arabinose growth	10	22	activator	-10
0	groSL	Xanthosine growth	-39	-14	activator	-35
1	groSL	Xanthosine growth	5	15	activator	TF
1	groSL	Xanthosine growth	15	22	activator	-10
0	idnK	heat shock	-41	-27	activator	-35
0	idnK	Iron supplement	-13	1	activator	-10
1	idnK	Iron supplement	-48	-27	repressor	TF
0	idnK	LB	-43	-30	activator	-35
1	idnK	LB	-14	1	activator	-10
2	idnK	LB	-48	-27	repressor	TF
0	idnK	Anaerobic growth	-45	-36	activator	-35
1	idnK	Anaerobic growth	-24	5	activator	-10
2	idnK	Anaerobic growth	-48	-32	repressor	TF
1	idnK	0cAMP	-38	-33	repressor	TF
0	idnK	Trehalose growth	-44	-36	activator	-35
1	idnK	Trehalose growth	-17	-8	activator	-10
2	idnK	Trehalose growth	-48	-32	repressor	TF
0	idnK	Zinc growth	-13	1	activator	-10
1	idnK	Zinc growth	-48	-32	repressor	TF
0	idnK	Xylose Arabinose growth	-44	-36	activator	-35
1	idnK	Xylose Arabinose growth	-13	1	activator	-10
2	idnK	Xylose Arabinose growth	-48	-27	repressor	TF
0	idnK	Xanthosine growth	-43	-30	activator	-35
1	idnK	Xanthosine growth	-16	-8	activator	-10
2	idnK	Xanthosine growth	-48	-32	repressor	TF
0	yedJ	heat shock	-58	-6	RNAP
0	yedJ	Iron supplement	-54	-18	activator	RNAP
1	yedJ	LB	-34	-20	activator	-10
0	yedJ	Anaerobic growth	-63	-20	activator	RNAP
1	yedJ	Anaerobic growth	-40	-12	repressor	TF
0	yedJ	Trehalose growth	-54	-45	activator	-35
1	yedJ	Trehalose growth	-34	-20	activator	-10
2	yedJ	Trehalose growth	-31	-12	repressor	-10
0	yedJ	Zinc growth	-63	-17	activator	RNAP
1	yedJ	Zinc growth	-40	-12	repressor	-10
0	yedJ	Xylose Arabinose growth	-54	-17	activator	RNAP
1	yedJ	Xylose Arabinose growth	-40	-23	repressor	-10
0	yedJ	Xanthosine growth	-63	-43	activator	-35
1	yedJ	Xanthosine growth	-34	-20	activator	-10
2	yedJ	Xanthosine growth	-40	-23	repressor	TF
0	yicI	heat shock	-112	-100	activator	TF
1	yicI	heat shock	-39	-16	activator	TF
2	yicI	heat shock	-5	18	activator	-10
0	yicI	Iron supplement	-111	-95	activator	TF
1	yicI	Iron supplement	-65	-57	activator	TF
2	yicI	Iron supplement	-40	-20	activator	TF
2	yicI	Iron supplement	-20	-10	activator	-10
3	yicI	Iron supplement	-5	15	activator	-10
0	yicI	LB	-112	-96	activator	TF
1	yicI	LB	-39	-28	activator	TF
0	yicI	Anaerobic growth	-30	-16	activator	TF
0	yicI	Anaerobic growth	-20	-16	activator	-35
1	yicI	Anaerobic growth	3	7	activator	-10
0	yicI	Trehalose growth	-65	-62	activator	TF
1	yicI	Trehalose growth	-40	-20	activator	TF
1	yicI	Trehalose growth	-20	-16	activator	-35
2	yicI	Trehalose growth	-5	18	activator	-10
0	yicI	Zinc growth	-43	-20	activator	TF
0	yicI	Zinc growth	-20	-16	activator	-35
1	yicI	Zinc growth	-5	7	activator	-10
0	yicI	Xylose Arabinose growth	-30	-20	activator	TF
0	yicI	Xylose Arabinose growth	-20	-16	activator	-35
0	yicI	Xanthosine growth	-30	-20	activator	TF
0	yicI	Xanthosine growth	-20	-16	activator	-35
1	yicI	Xanthosine growth	3	7	activator	-10
0	htrB	LB	-47	-35	activator	-35
1	htrB	LB	-17	-6	activator	-10
0	fdoH	heat shock	-114	-102	activator	-10
0	fdoH	Iron supplement	-114	-102	activator	-10
0	fdoH	LB	-114	-102	activator	-10
0	fdoH	Anaerobic growth	-114	-101	activator	-10
0	fdoH	Trehalose growth	-114	-106	activator	-10
0	fdoH	Zinc growth	-114	-102	activator	-10
0	fdoH	Xylose Arabinose growth	-114	-102	activator	-10
0	fdoH	Xanthosine growth	-114	-102	activator	-10
0	iap	heat shock	-12	-6	activator	-10
0	iap	Iron supplement	-12	3	activator	-10
0	iap	Iron supplement	3	29	activator	TF
0	iap	LB	-12	10	activator	-10
1	iap	LB	-28	-13	repressor	TF
2	iap	LB	22	29	repressor	TF
0	iap	Anaerobic growth	-17	10	activator	-10
1	iap	Anaerobic growth	23	29	activator	TF
0	iap	Zinc growth	-12	10	activator	-10
0	iap	Xylose Arabinose growth	-12	3	activator	-10
0	iap	Xylose Arabinose growth	3	29	activator	TF
0	iap	Xanthosine growth	-17	6	activator	-10
0	ybeZ	heat shock	-38	-11	activator	-35
0	ybeZ	Iron supplement	-7	29	activator	-10
1	ybeZ	Iron supplement	15	29	repressor	TF
0	ybeZ	LB	4	17	activator	-35
1	ybeZ	LB	21	29	activator	-10
2	ybeZ	LB	19	29	repressor	TF
0	ybeZ	Anaerobic growth	3	29	activator	-10
1	ybeZ	Anaerobic growth	15	29	repressor	TF
0	ybeZ	Trehalose growth	3	29	activator	-10
1	ybeZ	Trehalose growth	15	29	repressor	TF
0	ybeZ	Zinc growth	4	9	activator	-35
1	ybeZ	Zinc growth	25	29	activator	-10
2	ybeZ	Zinc growth	27	29	repressor	TF
0	ybeZ	Xylose Arabinose growth	-5	8	activator	-35
1	ybeZ	Xylose Arabinose growth	25	29	activator	-10
0	ybeZ	Xanthosine growth	25	29	activator	-10
1	ybeZ	Xanthosine growth	22	29	repressor	TF
0	araAB	heat shock	-76	-65	activator	TF
0	araAB	arabinose	-76	-56	activator	TF
0	araAB	arabinose	-102	-82	activator	TF
0	araAB	arabinose	-51	-32	activator	TF
0	araAB	Xylose Arabinose growth	-98	-82	activator	TF
0	araAB	Xylose Arabinose growth	-76	-56	activator	TF
0	araAB	Xylose Arabinose growth	-51	-32	activator	TF
1	araAB	Xylose Arabinose growth	-14	-8	activator	-10
0	rlmA	heat shock	-78	-51	activator	-10
0	rlmA	Iron supplement	-9	-4	activator	-10
0	rlmA	LB	-35	-5	activator	-10
0	rlmA	Anaerobic growth	-40	-5	activator	-10
0	rlmA	Trehalose growth	-70	-51	activator	-10
0	rlmA	Xylose Arabinose growth	-70	-51	activator	-10
1	rlmA	Xylose Arabinose growth	-10	-5	activator	-10
0	rlmA	Xanthosine growth	-10	-5	activator	-10
0	hslU	heat shock	-33	5	activator	RNAP
0	mscL	heat shock	-32	6	activator	-10
0	mscL	Iron supplement	-16	-7	activator	-10
0	mscL	LB	-17	-7	activator	-10
0	mscL	M9	-23	-9	activator	-10
0	mscL	Zinc growth	-23	-9	activator	-10
0	mscL	Xylose Arabinose growth	-30	-9	activator	-10
0	mscL	Xanthosine growth	-16	-7	activator	-10
0	zapB	heat shock	-45	-32	activator	-35
1	zapB	heat shock	-14	3	activator	-10
0	zapB	Iron supplement	-51	3	activator	RNAP
0	zapB	LB	-51	-8	activator	RNAP
0	zapB	M9	-39	-32	activator	-35
1	zapB	M9	-14	3	activator	-10
0	zapB	Anaerobic growth	-51	3	activator	RNAP
0	zapB	acetate	-45	3	activator	RNAP
0	zapB	phoP	-40	-32	activator	-35
1	zapB	phoP	-14	-4	activator	-10
0	zapB	0cAMP	-50	1	activator	RNAP
0	zapB	Trehalose growth	-38	-8	activator	RNAP
0	zapB	Zinc growth	-51	-8	activator	RNAP
0	zapB	Xylose Arabinose growth	-38	-8	activator	RNAP
0	zapB	Xanthosine growth	-38	-8	activator	RNAP
1	yqhC	heat shock	0	20	activator	-10
0	yqhC	Iron supplement	2	17	activator	-10
2	yqhC	Iron supplement	0	20	activator	-10
0	yqhC	LB	-43	-26	activator	-35
1	yqhC	LB	-9	5	activator	-10
2	yqhC	LB	9	13	activator	-10
1	yqhC	M9	0	20	activator	-10
0	yqhC	Anaerobic growth	2	16	activator	-10
1	yqhC	Trehalose growth	0	20	activator	-10
1	yqhC	Zinc growth	0	20	activator	-10
1	yqhC	Xylose Arabinose growth	0	20	activator	-10
1	yqhC	Xanthosine growth	0	20	activator	-10
0	ydhO	Zinc growth	7	23	activator	-10
0	yehS	heat shock	-2	5	activator	TF
0	yehS	heat shock	5	12	activator	-10
0	yehS	Iron supplement	-2	5	activator	TF
0	yehS	Iron supplement	5	12	activator	-10
0	yehS	LB	-22	17	activator	RNAP
0	yehS	LB	-2	5	activator	TF
0	yehS	M9	-4	5	activator	TF
0	yehS	M9	5	17	activator	-10
0	yehS	Anaerobic growth	-2	5	activator	TF
0	yehS	Anaerobic growth	-25	17	activator	RNAP
0	yehS	Trehalose growth	-2	5	activator	TF
0	yehS	Trehalose growth	5	12	activator	-10
0	yehS	Zinc growth	-14	17	activator	RNAP
0	yehS	Zinc growth	-2	5	activator	TF
0	yehS	Xylose Arabinose growth	-2	5	activator	TF
0	yehS	Xylose Arabinose growth	-25	17	activator	RNAP
0	yehS	Xanthosine growth	-2	5	activator	TF
0	yehS	Xanthosine growth	-25	12	activator	RNAP
0	dgoR	LB	-57	-50	activator	TF
1	dgoR	LB	-44	-35	repressor	TF
0	asnA	heat shock	-13	3	activator	-10
0	asnA	Iron supplement	-22	1	activator	-10
0	asnA	LB	-22	-5	activator	-10
0	asnA	Anaerobic growth	-13	3	activator	-10
0	asnA	Zinc growth	-22	-5	activator	-10
0	asnA	Xylose Arabinose growth	-22	3	activator	-10
0	asnA	Xanthosine growth	-22	-5	activator	-10
0	rcsF	Iron supplement	-71	-58	activator	TF
1	rcsF	Iron supplement	-36	-28	activator	-35
2	rcsF	Iron supplement	-15	4	activator	-10
0	rcsF	LB	-36	-26	activator	-35
1	rcsF	LB	-15	9	activator	-10
2	rcsF	LB	-24	-11	repressor	-10
0	rcsF	Anaerobic growth	-36	-29	activator	-35
1	rcsF	Anaerobic growth	-14	-3	activator	-10
0	rcsF	Trehalose growth	-63	-58	activator	TF
0	rcsF	Zinc growth	-70	-58	activator	TF
1	rcsF	Zinc growth	-46	-28	activator	-35
2	rcsF	Zinc growth	-14	-2	activator	-10
0	rcsF	Xylose Arabinose growth	-63	-53	activator	TF
1	rcsF	Xylose Arabinose growth	-36	-30	activator	-35
2	rcsF	Xylose Arabinose growth	-15	7	activator	-10
0	rcsF	Xanthosine growth	-71	-53	activator	TF
1	rcsF	Xanthosine growth	-14	-2	activator	-10
0	ybiP	heat shock	-8	1	activator	-10
0	ybiP	Iron supplement	-8	1	activator	-10
0	lac	LB	-114	-90	activator	TF
1	lac	LB	-77	-71	activator	-35
2	lac	LB	-52	-47	activator	-10
0	ompR	M9	-3	23	activator	-10
0	ompR	acetate	-37	-35	activator	-10
2	ompR	acetate	-113	-94	repressor	TF
3	ompR	acetate	-56	-25	repressor	TF
4	ompR	acetate	-1	13	repressor	TF
0	ompR	Xanthosine growth	-1	15	activator	-10
0	bdcR	heat shock	-47	-3	activator	RNAP
1	bdcR	heat shock	-25	1	repressor	TF
0	bdcR	Iron supplement	-47	-1	activator	RNAP
1	bdcR	Iron supplement	-27	-5	repressor	TF
0	bdcR	LB	-35	-7	activator	RNAP
1	bdcR	LB	-27	1	repressor	TF
0	bdcR	M9	-42	-28	activator	-35
1	bdcR	M9	-16	-7	activator	-10
0	bdcR	Anaerobic growth	-47	-7	activator	RNAP
1	bdcR	Anaerobic growth	-27	1	repressor	TF
0	bdcR	deoR	-42	0	activator	RNAP
1	bdcR	deoR	-22	-6	repressor	TF
0	bdcR	Trehalose growth	-47	-7	activator	RNAP
1	bdcR	Trehalose growth	-27	-4	repressor	TF
0	bdcR	Zinc growth	-47	-7	activator	RNAP
1	bdcR	Zinc growth	-27	-5	repressor	TF
0	bdcR	Xylose Arabinose growth	-47	-7	activator	RNAP
1	bdcR	Xylose Arabinose growth	-27	1	repressor	TF
0	bdcR	Xanthosine growth	-47	3	activator	RNAP
1	bdcR	Xanthosine growth	-25	1	repressor	TF
0	yehU	heat shock	-55	-27	activator	-35
0	yehU	LB	-18	-3	activator	-10
0	yehU	Anaerobic growth	-62	-25	activator	TF
0	yehU	Anaerobic growth	-25	7	activator	-10
1	yehU	Zinc growth	-9	-3	activator	-10
0	yehU	Xylose Arabinose growth	-83	-69	activator	-10
1	yehU	Xylose Arabinose growth	-56	-42	activator	-35
2	yehU	Xylose Arabinose growth	-20	-3	activator	-10
0	yehU	Xanthosine growth	-78	-63	activator	-10
1	yehU	Xanthosine growth	-56	-38	activator	-35
2	yehU	Xanthosine growth	-19	-3	activator	-10
0	WaaA-coaD	LB	-50	-39	activator	TF
0	WaaA-coaD	LB	-39	-32	activator	-35
1	WaaA-coaD	LB	-14	2	activator	-10
0	WaaA-coaD	M9	-13	1	activator	-10
0	WaaA-coaD	Anaerobic growth	-44	-39	activator	TF
0	WaaA-coaD	Anaerobic growth	-39	-32	activator	-35
1	WaaA-coaD	Anaerobic growth	-14	5	activator	-10
0	WaaA-coaD	Zinc growth	-50	-39	activator	TF
0	WaaA-coaD	Zinc growth	-39	-32	activator	-35
1	WaaA-coaD	Zinc growth	-13	-1	activator	-10
0	WaaA-coaD	Xylose Arabinose growth	-53	-39	activator	TF
0	WaaA-coaD	Xylose Arabinose growth	-39	-1	activator	RNAP
0	WaaA-coaD	Xanthosine growth	-53	-39	activator	TF
0	WaaA-coaD	Xanthosine growth	-39	-9	activator	RNAP
0	ygdH	heat shock	-44	-8	activator	RNAP
0	ygdH	Iron supplement	-37	-8	activator	RNAP
0	ygdH	LB	-37	-7	activator	RNAP
0	ygdH	Anaerobic growth	-37	-7	activator	RNAP
0	ygdH	Trehalose growth	-37	-7	activator	RNAP
0	ygdH	Zinc growth	-37	-7	activator	RNAP
0	ygdH	Xylose Arabinose growth	-37	-7	activator	RNAP
0	ygdH	Xanthosine growth	-37	-7	activator	RNAP
0	znuA	heat shock	8	19	repressor	TF
0	znuA	Iron supplement	4	29	activator	RNAP
1	znuA	Iron supplement	20	29	repressor	TF
0	znuA	Anaerobic growth	5	29	activator	-10
0	znuA	Trehalose growth	13	28	activator	-10
0	znuA	Zinc growth	8	19	activator	-10
0	znuA	Xylose Arabinose growth	8	29	activator	-10
1	znuA	Xylose Arabinose growth	18	29	repressor	TF
0	znuA	Xanthosine growth	8	29	activator	-10
1	znuA	Xanthosine growth	18	29	repressor	TF
0	uvrD	LB	-15	-8	activator	-10
0	uvrD	acetate	22	29	activator	-10
0	uvrD	acetate	6	14	repressor	TF
0	uvrD	0cAMP	-43	-29	activator	-35
1	uvrD	0cAMP	-13	-8	activator	-10
0	uvrD	Xanthosine growth	-15	-8	activator	-10
0	modE	LB	-25	-11	activator	-10
0	modE	Anaerobic growth	-37	-19	activator	-35
0	modE	Xylose Arabinose growth	-35	-19	activator	-35
0	ygjP	heat shock	-28	-12	activator	-10
0	ygjP	Iron supplement	-33	-19	activator	-35
0	ygjP	LB	-61	-12	activator	RNAP
0	ygjP	M9	-27	-12	activator	-10
0	ygjP	Anaerobic growth	-61	-46	activator	TF
1	ygjP	Anaerobic growth	-28	-19	activator	-35
0	ygjP	Zinc growth	-28	-19	activator	-35
0	ygjP	Xylose Arabinose growth	-61	-46	activator	TF
1	ygjP	Xylose Arabinose growth	-28	-19	activator	-35
0	ygjP	Xanthosine growth	-50	-19	activator	-35
0	yggW	heat shock	-36	-30	activator	-35
1	yggW	heat shock	-16	1	activator	-10
0	tig	heat shock	-36	-7	activator	RNAP
2	tig	heat shock	-15	1	repressor	TF
0	tig	Iron supplement	-36	-30	activator	-35
1	tig	Iron supplement	-14	-6	activator	-10
0	tig	LB	-36	-6	activator	RNAP
0	tig	Anaerobic growth	-36	-6	activator	RNAP
0	tig	phoP	-36	-6	activator	RNAP
0	tig	Trehalose growth	-36	-31	activator	-35
1	tig	Trehalose growth	-14	-7	activator	-10
0	tig	Zinc growth	-36	-6	activator	RNAP
0	tig	Xylose Arabinose growth	-36	-6	activator	RNAP
0	tig	Xanthosine growth	-36	-6	activator	RNAP
0	dicC	heat shock	-35	-30	activator	-35
1	dicC	heat shock	-12	-6	activator	-10
2	dicC	heat shock	-6	10	repressor	TF
0	dicC	Iron supplement	-45	-30	activator	-35
1	dicC	Iron supplement	-12	-6	activator	-10
2	dicC	Iron supplement	-13	10	repressor	TF
0	dicC	LB	-41	-30	activator	-35
1	dicC	LB	-12	-6	activator	-10
0	dicC	Anaerobic growth	-36	-30	activator	-35
1	dicC	Anaerobic growth	-12	-6	activator	-10
0	dicC	acetate	-48	-28	activator	-35
1	dicC	acetate	-12	-6	activator	-10
2	dicC	acetate	-13	10	repressor	TF
0	dicC	Trehalose growth	-35	-30	activator	-35
1	dicC	Trehalose growth	-12	-6	activator	-10
2	dicC	Trehalose growth	-6	10	repressor	TF
0	dicC	Zinc growth	-45	-30	activator	-35
1	dicC	Zinc growth	-12	-6	activator	-10
2	dicC	Zinc growth	-6	8	repressor	TF
0	dicC	Xylose Arabinose growth	-45	-30	activator	-35
1	dicC	Xylose Arabinose growth	-12	-6	activator	-10
2	dicC	Xylose Arabinose growth	-13	10	repressor	TF
0	dicC	Xanthosine growth	-43	-28	activator	-35
1	dicC	Xanthosine growth	-12	-6	activator	-10
2	dicC	Xanthosine growth	-5	10	repressor	TF
0	ydjA	heat shock	-37	-9	activator	RNAP
1	ydjA	heat shock	-21	1	repressor	TF
0	ydjA	Iron supplement	-39	-36	activator	-35
1	ydjA	Iron supplement	-20	-9	activator	-10
2	ydjA	Iron supplement	-11	5	repressor	TF
0	ydjA	LB	-49	-9	activator	RNAP
1	ydjA	LB	-21	-3	repressor	TF
0	ydjA	Anaerobic growth	-24	-9	activator	-10
1	ydjA	Anaerobic growth	-11	1	repressor	TF
0	ydjA	Trehalose growth	-24	-9	activator	-10
1	ydjA	Trehalose growth	-10	1	repressor	TF
0	ydjA	Zinc growth	-29	-9	activator	RNAP
1	ydjA	Zinc growth	-10	-3	repressor	TF
0	ydjA	Xylose Arabinose growth	-37	-34	activator	-35
1	ydjA	Xylose Arabinose growth	-20	-9	activator	-10
2	ydjA	Xylose Arabinose growth	-21	1	repressor	TF
0	ydjA	Xanthosine growth	-37	-9	activator	RNAP
1	ydjA	Xanthosine growth	-21	1	repressor	TF
0	ybjT	heat shock	-36	-25	activator	-35
0	ybjT	Iron supplement	-36	-30	activator	-35
1	ybjT	Iron supplement	-18	-9	activator	-10
0	ybjT	LB	-36	-30	activator	-35
1	ybjT	LB	-18	-9	activator	-10
0	ybjT	Anaerobic growth	-43	-9	activator	RNAP
0	ybjT	Zinc growth	-36	-28	activator	-35
1	ybjT	Zinc growth	-18	-9	activator	-10
0	ybjT	Xylose Arabinose growth	-36	-9	activator	RNAP
0	ybjT	Xanthosine growth	-36	-30	activator	-35
1	ybjT	Xanthosine growth	-18	-9	activator	-10
0	zupT	heat shock	-23	-13	activator	-10
0	zupT	Iron supplement	-23	-13	activator	-10
0	zupT	LB	-23	-3	activator	-10
0	zupT	Anaerobic growth	-23	-2	activator	-10
0	zupT	acetate	-23	-14	activator	-10
0	zupT	0cAMP	-23	-3	activator	-10
0	zupT	Zinc growth	-23	-13	activator	-10
0	zupT	Xylose Arabinose growth	-23	-14	activator	-10
0	zupT	Xanthosine growth	-23	-13	activator	-10
0	yedK	heat shock	4	20	activator	-10
1	yedK	heat shock	-11	25	repressor	TF
0	yedK	Iron supplement	-3	27	activator	-10
1	yedK	Iron supplement	-11	1	repressor	TF
2	yedK	Iron supplement	12	17	repressor	TF
0	yedK	LB	7	27	activator	-10
0	yedK	M9	-11	-4	activator	-35
1	yedK	M9	11	25	activator	-10
2	yedK	M9	4	21	repressor	TF
0	yedK	Anaerobic growth	-22	-10	activator	-35
1	yedK	Anaerobic growth	7	27	activator	-10
0	yedK	deoR	10	23	activator	-10
1	yedK	deoR	12	25	repressor	TF
0	yedK	Trehalose growth	-14	25	activator	-10
1	yedK	Trehalose growth	-3	27	repressor	TF
0	yedK	Zinc growth	-14	24	activator	-10
1	yedK	Zinc growth	-3	27	repressor	TF
0	yedK	Xylose Arabinose growth	4	27	activator	-10
1	yedK	Xylose Arabinose growth	-14	17	repressor	TF
0	thrLABC	heat shock	-57	-41	activator	TF
0	thrLABC	heat shock	-41	-3	activator	RNAP
0	thrLABC	Iron supplement	-46	-7	activator	RNAP
0	thrLABC	LB	-46	-5	activator	RNAP
0	thrLABC	Anaerobic growth	-57	-41	activator	TF
0	thrLABC	Anaerobic growth	-41	0	activator	RNAP
0	thrLABC	Trehalose growth	-57	-41	activator	TF
0	thrLABC	Trehalose growth	-41	0	activator	RNAP
0	thrLABC	Zinc growth	-52	-41	activator	TF
0	thrLABC	Zinc growth	-41	-8	activator	RNAP
0	thrLABC	Xylose Arabinose growth	-52	-41	activator	TF
0	thrLABC	Xylose Arabinose growth	-41	-7	activator	RNAP
0	thrLABC	Xanthosine growth	-52	-41	activator	TF
0	thrLABC	Xanthosine growth	-41	0	activator	RNAP
0	cra	heat shock	-12	-4	activator	-10
0	cra	Iron supplement	-15	-8	activator	-10
0	cra	LB	-18	-5	activator	-10
0	cra	Anaerobic growth	-18	-8	activator	-10
0	cra	acetate	-19	-9	activator	-10
0	cra	0cAMP	-12	1	activator	-10
0	cra	Trehalose growth	-21	-8	activator	-10
0	cra	Zinc growth	-18	-8	activator	-10
0	cra	Xylose Arabinose growth	-18	-8	activator	-10
0	cra	Xanthosine growth	-18	-8	activator	-10
0	sbcB	heat shock	-13	-5	activator	-10
0	sbcB	LB	-23	1	activator	-10
0	sbcB	Trehalose growth	-13	-5	activator	-10
0	sbcB	Xylose Arabinose growth	-12	1	activator	-10
0	sbcB	Xanthosine growth	-13	-1	activator	-10
0	mscM	heat shock	24	29	activator	-10
0	mscM	Iron supplement	-36	-26	activator	-35
2	mscM	Iron supplement	20	29	repressor	TF
0	mscM	Trehalose growth	20	29	repressor	TF
0	mscM	Zinc growth	20	29	repressor	TF
0	mscM	Xylose Arabinose growth	20	29	repressor	TF
0	pcm	LB	-45	-23	activator	-35
1	pcm	LB	-17	-7	activator	-10
2	pcm	LB	-15	-10	repressor	TF
1	pcm	Anaerobic growth	-46	-27	activator	-35
2	pcm	Anaerobic growth	-16	-2	activator	-10
3	pcm	Anaerobic growth	16	28	activator	-10
4	pcm	Anaerobic growth	-60	-34	repressor	TF
0	pcm	Xylose Arabinose growth	-17	-7	activator	-10
0	rspA	heat shock	-28	0	repressor	TF
0	rspA	Iron supplement	-57	-18	activator	TF
1	rspA	Iron supplement	1	17	activator	RNAP
2	rspA	Iron supplement	-28	2	repressor	TF
0	rspA	arabinose	-57	-18	activator	TF
1	rspA	arabinose	-5	9	activator	-10
2	rspA	arabinose	-17	2	repressor	TF
0	rspA	LB	-56	-19	activator	TF
1	rspA	LB	-5	17	activator	-10
2	rspA	LB	-28	2	repressor	TF
0	rspA	Anaerobic growth	-57	-18	activator	TF
0	rspA	Anaerobic growth	-18	7	activator	RNAP
1	rspA	Anaerobic growth	-17	2	repressor	TF
0	rspA	Trehalose growth	-57	-18	activator	TF
0	rspA	Trehalose growth	-18	12	activator	RNAP
1	rspA	Trehalose growth	-17	0	repressor	TF
0	rspA	Zinc growth	-56	-18	activator	TF
1	rspA	Zinc growth	-6	7	activator	RNAP
2	rspA	Zinc growth	-17	2	repressor	TF
0	rspA	Xylose Arabinose growth	-56	-18	activator	TF
0	rspA	Xylose Arabinose growth	-18	17	activator	RNAP
1	rspA	Xylose Arabinose growth	-17	0	repressor	TF
0	rspA	Xanthosine growth	-56	-19	activator	TF
1	rspA	Xanthosine growth	-6	7	activator	RNAP
2	rspA	Xanthosine growth	-17	0	repressor	TF
0	ilvC	heat shock	-35	0	repressor	TF
0	ilvC	Iron supplement	-75	-28	activator	TF
1	ilvC	Iron supplement	-17	4	activator	-10
2	ilvC	Iron supplement	-30	0	repressor	TF
0	ilvC	LB	-33	0	repressor	TF
0	ilvC	M9	-33	-11	activator	-10
0	ilvC	Anaerobic growth	-24	0	repressor	TF
0	ilvC	Zinc growth	-64	-28	activator	TF
1	ilvC	Zinc growth	-17	-4	activator	-10
2	ilvC	Zinc growth	-30	0	repressor	TF
0	ilvC	Xylose Arabinose growth	-56	-28	activator	TF
1	ilvC	Xylose Arabinose growth	-17	2	activator	-10
2	ilvC	Xylose Arabinose growth	-30	0	repressor	TF
0	ilvC	Xanthosine growth	-64	-52	activator	TF
1	ilvC	Xanthosine growth	-42	-28	activator	-35
2	ilvC	Xanthosine growth	-17	2	activator	-10
3	ilvC	Xanthosine growth	-30	0	repressor	TF
0	araC	heat shock	-66	-38	activator	RNAP
1	araC	heat shock	-40	-31	repressor	TF
0	araC	Iron supplement	-66	-24	activator	RNAP
0	araC	arabinose	-66	-24	activator	RNAP
1	araC	arabinose	-47	-27	repressor	TF
0	araC	LB	-66	-24	activator	RNAP
1	araC	LB	-16	-7	activator	-10
2	araC	LB	-40	-31	repressor	TF
0	araC	Anaerobic growth	-84	-24	activator	RNAP
1	araC	Anaerobic growth	-40	-31	repressor	TF
0	araC	0cAMP	-114	-98	activator	TF
1	araC	0cAMP	-51	-32	activator	RNAP
0	araC	Trehalose growth	-66	-24	activator	RNAP
1	araC	Trehalose growth	-40	-31	repressor	TF
0	araC	Zinc growth	-66	-24	activator	RNAP
1	araC	Zinc growth	-40	-33	repressor	TF
0	araC	Xylose Arabinose growth	-66	-24	activator	RNAP
1	araC	Xylose Arabinose growth	-40	-27	repressor	TF
0	araC	Xanthosine growth	-66	-24	activator	RNAP
1	araC	Xanthosine growth	-93	-86	repressor	TF
2	araC	Xanthosine growth	-40	-27	repressor	TF
0	znuCB	heat shock	-14	0	activator	-10
0	znuCB	Iron supplement	-14	-2	repressor	TF
0	znuCB	LB	-25	0	activator	-10
2	znuCB	LB	-14	-3	repressor	TF
0	znuCB	Anaerobic growth	-16	-12	activator	-10
1	znuCB	Anaerobic growth	-14	-2	repressor	TF
0	znuCB	Zinc growth	-14	-2	repressor	TF
0	znuCB	Xylose Arabinose growth	-18	-12	activator	-10
1	znuCB	Xylose Arabinose growth	-14	0	repressor	TF
0	znuCB	Xanthosine growth	-18	-8	activator	-10
1	znuCB	Xanthosine growth	-18	-2	repressor	TF
0	tar	heat shock	-5	1	activator	-10
0	tar	LB	22	29	activator	RNAP
0	tar	M9	-11	1	activator	-10
1	tar	M9	21	29	activator	RNAP
0	tar	Trehalose growth	-4	10	activator	-10
0	sdaB	heat shock	-23	-2	activator	-10
0	sdaB	Iron supplement	-29	-2	activator	-10
0	sdaB	LB	-35	-24	activator	-35
0	sdaB	M9	-27	-15	activator	-10
0	sdaB	Anaerobic growth	-47	-33	activator	-35
1	sdaB	Anaerobic growth	-21	-2	activator	-10
0	sdaB	Trehalose growth	-29	-2	activator	-10
0	sdaB	Zinc growth	-33	-2	activator	-10
0	sdaB	Xylose Arabinose growth	-23	-2	activator	-10
0	sdaB	Xanthosine growth	-47	-33	activator	-35
1	sdaB	Xanthosine growth	-29	-15	activator	-10
0	ymgG	SS	-51	-38	activator	TF
0	ymgG	heat shock	-53	-34	activator	TF
1	ymgG	heat shock	-13	2	activator	-10
0	ymgG	M9	-111	-97	repressor	TF
0	ymgG	Zinc growth	-50	-31	activator	TF
0	ymgG	Xanthosine growth	-56	-32	activator	TF
0	arcB	LB	-24	-2	activator	-10
0	arcB	Xylose Arabinose growth	-60	-7	activator	RNAP
0	rel	M9	-10	16	repressor	TF
0	coaA	Iron supplement	-45	-30	activator	-35
1	coaA	Iron supplement	-17	5	activator	-10
2	coaA	Iron supplement	-37	-6	repressor	TF
0	coaA	LB	-45	-30	activator	-35
1	coaA	LB	-17	-7	activator	-10
3	coaA	LB	-18	1	repressor	TF
0	coaA	Anaerobic growth	-45	7	activator	-10
2	coaA	Anaerobic growth	-37	-6	repressor	TF
0	coaA	acetate	-16	-8	activator	-10
2	coaA	acetate	-18	-4	repressor	TF
0	coaA	phoP	-45	-30	activator	-35
1	coaA	phoP	-19	-8	activator	-10
0	coaA	Trehalose growth	-28	0	activator	-10
1	coaA	Trehalose growth	-37	-4	repressor	TF
0	coaA	Zinc growth	-16	-8	activator	-10
2	coaA	Zinc growth	-18	-4	repressor	TF
0	coaA	Xylose Arabinose growth	-45	-21	activator	-35
1	coaA	Xylose Arabinose growth	-17	-1	activator	-10
3	coaA	Xylose Arabinose growth	-37	1	repressor	TF
0	coaA	Xanthosine growth	-45	-30	activator	-35
1	coaA	Xanthosine growth	-25	-8	activator	-10
2	coaA	Xanthosine growth	-37	1	repressor	TF
0	ybiO	heat shock	2	29	activator	RNAP
1	ybiO	heat shock	-11	21	repressor	TF
0	ybiO	Iron supplement	4	29	activator	RNAP
1	ybiO	Iron supplement	-3	15	repressor	TF
0	ybiO	LB	-32	-12	activator	-35
1	ybiO	LB	-11	15	repressor	TF
0	ybiO	Trehalose growth	-5	15	repressor	TF
0	ybiO	Zinc growth	10	26	activator	RNAP
1	ybiO	Zinc growth	-11	15	repressor	TF
0	ybiO	Xylose Arabinose growth	2	28	activator	RNAP
1	ybiO	Xylose Arabinose growth	-11	15	repressor	TF
0	ybiO	Xanthosine growth	-27	-12	activator	-35
1	ybiO	Xanthosine growth	-11	15	repressor	TF
0	ybdG	LB	-35	0	activator	-10
0	ybdG	Xanthosine growth	-11	4	activator	-10
0	ycbZ	heat shock	-37	-23	activator	-35
1	ycbZ	heat shock	-14	8	activator	-10
0	ycbZ	Iron supplement	-37	-23	activator	-35
1	ycbZ	Iron supplement	-14	4	activator	-10
0	ycbZ	LB	-39	-18	activator	TF
0	ycbZ	LB	-18	-3	activator	-10
0	ycbZ	Anaerobic growth	-38	-18	activator	TF
0	ycbZ	Anaerobic growth	-18	-3	activator	-10
0	ycbZ	phoP	-37	-18	activator	TF
0	ycbZ	phoP	-18	-4	activator	-10
0	ycbZ	0cAMP	-14	-4	activator	-10
0	ycbZ	Trehalose growth	-37	-23	activator	-35
1	ycbZ	Trehalose growth	-14	8	activator	-10
0	ycbZ	Zinc growth	-37	-23	activator	-35
1	ycbZ	Zinc growth	-14	8	activator	-10
0	ycbZ	Xylose Arabinose growth	-37	-18	activator	TF
0	ycbZ	Xylose Arabinose growth	-18	8	activator	-10
0	ycbZ	Xanthosine growth	-38	-18	activator	TF
0	ycbZ	Xanthosine growth	-18	8	activator	-10
0	acuI	heat shock	-113	-88	activator	RNAP
1	acuI	heat shock	-38	-16	activator	RNAP
0	acuI	Iron supplement	-113	-101	activator	RNAP
1	acuI	Iron supplement	-37	-16	activator	RNAP
0	acuI	LB	-113	-101	activator	RNAP
1	acuI	LB	-31	-16	activator	RNAP
0	acuI	M9	-113	-100	activator	RNAP
1	acuI	M9	-26	-16	activator	RNAP
0	acuI	Anaerobic growth	-103	-99	activator	RNAP
1	acuI	Anaerobic growth	-37	-16	activator	RNAP
2	acuI	Anaerobic growth	-4	8	activator	RNAP
0	acuI	Trehalose growth	-37	-16	activator	RNAP
0	acuI	Zinc growth	-101	-88	activator	RNAP
1	acuI	Zinc growth	-26	-16	activator	RNAP
0	acuI	Xylose Arabinose growth	-113	-100	activator	RNAP
1	acuI	Xylose Arabinose growth	-37	-16	activator	RNAP
0	acuI	Xanthosine growth	-113	-88	activator	RNAP
1	acuI	Xanthosine growth	-31	-16	activator	RNAP
0	leuABCD	heat shock	-38	-6	activator	RNAP
0	leuABCD	Iron supplement	-38	7	activator	RNAP
0	leuABCD	LB	-39	-4	activator	RNAP
1	leuABCD	LB	-15	-8	repressor	TF
2	leuABCD	LB	3	14	repressor	TF
0	leuABCD	Anaerobic growth	-39	-31	activator	-35
1	leuABCD	Anaerobic growth	-14	-6	activator	-10
0	leuABCD	acetate	-50	-6	activator	RNAP
0	leuABCD	0cAMP	-47	-31	activator	-35
1	leuABCD	0cAMP	-13	-6	activator	-10
2	leuABCD	0cAMP	-10	3	repressor	TF
0	leuABCD	Trehalose growth	-47	-6	activator	RNAP
1	leuABCD	Trehalose growth	-18	-10	repressor	TF
0	leuABCD	Zinc growth	-50	-6	activator	RNAP
1	leuABCD	Zinc growth	24	29	repressor	TF
0	leuABCD	fum1	-48	-5	activator	RNAP
0	leuABCD	Xylose Arabinose growth	-38	-6	activator	RNAP
0	leuABCD	Xanthosine growth	-38	-6	activator	RNAP
0	ybjL	heat shock	-14	0	activator	-10
1	ybjL	heat shock	-20	-7	repressor	TF
0	ybjL	Iron supplement	-26	-2	activator	-10
1	ybjL	Iron supplement	-11	-7	repressor	TF
0	ybjL	LB	-65	-53	activator	-35
1	ybjL	LB	-19	-7	activator	-10
2	ybjL	LB	-87	-78	repressor	TF
3	ybjL	LB	-14	-2	repressor	TF
0	ybjL	Anaerobic growth	-62	-53	activator	-35
1	ybjL	Anaerobic growth	-87	-78	repressor	TF
2	ybjL	Anaerobic growth	-14	-2	repressor	TF
0	ybjL	Trehalose growth	-62	-53	activator	-35
1	ybjL	Trehalose growth	-20	-7	activator	-10
2	ybjL	Trehalose growth	3	13	repressor	TF
0	ybjL	Zinc growth	-65	-53	activator	-35
1	ybjL	Zinc growth	-15	-7	activator	-10
0	ybjL	Xylose Arabinose growth	-65	-53	activator	-35
1	ybjL	Xylose Arabinose growth	-15	-7	activator	-10
2	ybjL	Xylose Arabinose growth	-80	-78	repressor	TF
3	ybjL	Xylose Arabinose growth	-14	-2	repressor	TF
0	ybjL	Xanthosine growth	-65	-47	activator	-35
1	ybjL	Xanthosine growth	-80	-78	repressor	TF
2	ybjL	Xanthosine growth	-14	-2	repressor	TF
0	yecE	heat shock	-6	8	activator	-10
1	yecE	heat shock	-35	3	repressor	TF
0	yecE	Iron supplement	-31	17	activator	RNAP
1	yecE	Iron supplement	-4	9	repressor	TF
0	yecE	LB	-31	4	activator	RNAP
1	yecE	LB	-6	4	repressor	TF
0	yecE	M9	-6	9	activator	RNAP
1	yecE	M9	-35	-10	repressor	TF
0	yecE	Anaerobic growth	-31	17	activator	RNAP
1	yecE	Anaerobic growth	-6	9	repressor	TF
0	yecE	phoP	-32	14	activator	RNAP
1	yecE	phoP	-6	9	repressor	TF
0	yecE	deoR	-2	12	activator	RNAP
0	yecE	Zinc growth	-40	3	activator	RNAP
1	yecE	Zinc growth	-6	9	repressor	TF
0	yecE	Xylose Arabinose growth	-32	3	activator	RNAP
1	yecE	Xylose Arabinose growth	-6	9	repressor	TF
0	yecE	Xanthosine growth	-34	3	activator	RNAP
1	yecE	Xanthosine growth	-6	9	repressor	TF
0	pitA	LB	-21	-3	activator	-10
0	dusC	heat shock	-48	-42	activator	-35
1	dusC	heat shock	-30	-19	activator	-35
2	dusC	heat shock	-43	-16	repressor	TF
0	dusC	Iron supplement	-48	-40	activator	-35
1	dusC	Iron supplement	-30	-18	activator	-35
2	dusC	Iron supplement	-43	-16	repressor	TF
0	dusC	LB	-48	-42	activator	-35
1	dusC	LB	-26	-18	activator	-10
0	dusC	M9	-29	-16	activator	-10
1	dusC	M9	-26	-19	repressor	TF
0	dusC	Anaerobic growth	-48	-42	activator	-35
1	dusC	Anaerobic growth	-28	-18	activator	-10
0	dusC	0cAMP	-54	-46	activator	-35
1	dusC	0cAMP	-24	-6	activator	-10
0	dusC	Trehalose growth	-48	-42	activator	-35
1	dusC	Trehalose growth	-30	-19	activator	-10
2	dusC	Trehalose growth	-43	-16	repressor	TF
0	dusC	Zinc growth	-48	-42	activator	-35
1	dusC	Zinc growth	-30	-18	activator	-10
2	dusC	Zinc growth	-43	-16	repressor	TF
0	dusC	Xylose Arabinose growth	-48	-18	activator	RNAP
1	dusC	Xylose Arabinose growth	-43	-16	repressor	TF
0	dusC	Xanthosine growth	-48	-42	activator	-35
1	dusC	Xanthosine growth	-30	-18	activator	-10
2	dusC	Xanthosine growth	-43	-16	repressor	TF
0	ybjX	LB	-90	-72	activator	TF
1	ybjX	LB	-17	-8	activator	-10
0	dinJ	heat shock	-35	-33	activator	-35
1	dinJ	heat shock	-17	-4	activator	-10
3	dinJ	heat shock	5	14	repressor	TF
0	dinJ	Iron supplement	-35	-32	activator	-35
1	dinJ	Iron supplement	-17	-4	activator	-10
0	dinJ	LB	-35	-32	activator	-35
1	dinJ	LB	-17	-4	activator	-10
0	dinJ	Anaerobic growth	-35	-4	activator	-10
0	dinJ	0cAMP	-44	-26	activator	-35
1	dinJ	0cAMP	-17	-7	activator	-10
0	dinJ	Trehalose growth	-35	-33	activator	-35
1	dinJ	Trehalose growth	-12	-4	activator	-10
0	dinJ	Zinc growth	-35	-32	activator	-35
1	dinJ	Zinc growth	-17	-4	activator	-10
0	dinJ	Xylose Arabinose growth	-35	-32	activator	-35
1	dinJ	Xylose Arabinose growth	-17	-4	activator	-10
0	dinJ	Xanthosine growth	-35	-32	activator	-35
1	dinJ	Xanthosine growth	-16	-6	activator	-10
0	aphA	heat shock	-19	-8	activator	-10
1	aphA	heat shock	-20	1	repressor	TF
0	aphA	Iron supplement	-36	-30	activator	-35
1	aphA	Iron supplement	-19	-1	activator	-10
2	aphA	Iron supplement	-20	-6	repressor	TF
0	aphA	LB	-43	-30	activator	-35
1	aphA	LB	-14	-2	activator	-10
2	aphA	LB	-21	-6	repressor	TF
0	aphA	M9	-16	-7	repressor	TF
0	aphA	Anaerobic growth	-71	-30	activator	TF
1	aphA	Anaerobic growth	-17	7	activator	-10
2	aphA	Anaerobic growth	-21	-7	repressor	TF
0	aphA	deoR	-43	-29	activator	-35
1	aphA	deoR	-15	-1	activator	-10
2	aphA	deoR	-21	-6	repressor	TF
0	aphA	0cAMP	-21	-7	repressor	TF
0	aphA	Trehalose growth	-36	-30	activator	-35
1	aphA	Trehalose growth	-14	-1	activator	-10
2	aphA	Trehalose growth	-73	-62	repressor	TF
3	aphA	Trehalose growth	-18	-7	repressor	TF
0	aphA	Zinc growth	-36	-30	activator	-35
1	aphA	Zinc growth	-19	-1	activator	-10
2	aphA	Zinc growth	-20	1	repressor	TF
0	aphA	Xylose Arabinose growth	-36	-30	activator	-35
1	aphA	Xylose Arabinose growth	-15	-2	activator	-10
2	aphA	Xylose Arabinose growth	-73	-68	repressor	TF
3	aphA	Xylose Arabinose growth	-21	-6	repressor	TF
0	aphA	Xanthosine growth	-36	-30	activator	-35
1	aphA	Xanthosine growth	-17	-7	activator	-10
2	aphA	Xanthosine growth	-73	-62	repressor	TF
3	aphA	Xanthosine growth	-21	-6	repressor	TF
0	poxB	heat shock	-26	0	activator	-10
0	poxB	Iron supplement	-18	-8	activator	-10
0	poxB	Zinc growth	-18	-8	activator	-10
0	poxB	Xylose Arabinose growth	-18	-8	activator	-10
0	yjjJ	heat shock	-22	8	repressor	TF
0	yjjJ	heat shock	30	45	repressor	TF
0	yjjJ	Iron supplement	9	22	activator	-10
1	yjjJ	Iron supplement	-24	10	repressor	TF
1	yjjJ	LB	-18	-6	activator	-35
2	yjjJ	LB	15	16	repressor	TF
0	yjjJ	Anaerobic growth	-24	14	activator	RNAP
0	yjjJ	phoP	-18	19	activator	RNAP
0	yjjJ	Trehalose growth	-1	11	activator	-10
1	yjjJ	Trehalose growth	-13	14	repressor	TF
0	yjjJ	Zinc growth	-13	-7	repressor	TF
0	yjjJ	Xylose Arabinose growth	-24	19	activator	RNAP
1	yjjJ	Xylose Arabinose growth	15	18	repressor	TF
0	yjjJ	Xanthosine growth	-22	14	activator	RNAP
0	yeiQ	LB	-44	-34	activator	-35
0	yeiQ	Anaerobic growth	-76	-51	activator	TF
1	yeiQ	Anaerobic growth	-25	-7	activator	-10
0	yeiQ	Trehalose growth	-77	-62	activator	TF
1	yeiQ	Trehalose growth	-13	-8	activator	-10
0	yeiQ	Xylose Arabinose growth	-77	-64	activator	TF
1	yeiQ	Xylose Arabinose growth	-36	-27	activator	-35
2	yeiQ	Xylose Arabinose growth	-19	5	activator	-10
0	yeiQ	Xanthosine growth	-77	-64	activator	TF
1	yeiQ	Xanthosine growth	-13	0	activator	-10
0	rapA	heat shock	-109	-99	activator	RNAP
1	rapA	heat shock	-13	11	repressor	TF
0	rapA	Iron supplement	-46	-25	activator	RNAP
1	rapA	Iron supplement	-16	-5	activator	RNAP
2	rapA	Iron supplement	-34	-19	repressor	TF
3	rapA	Iron supplement	-14	8	repressor	TF
0	rapA	LB	-44	-5	activator	RNAP
1	rapA	LB	-11	3	repressor	TF
0	rapA	M9	-15	11	repressor	TF
1	rapA	M9	-112	-99	activator	RNAP
0	rapA	Anaerobic growth	-35	-5	activator	RNAP
1	rapA	Anaerobic growth	-19	-8	repressor	TF
0	rapA	deoR	-109	-90	activator	RNAP
0	rapA	Trehalose growth	-38	-30	activator	RNAP
1	rapA	Trehalose growth	-12	-5	activator	-10
2	rapA	Trehalose growth	-13	11	repressor	TF
0	rapA	Zinc growth	-36	-5	activator	RNAP
1	rapA	Zinc growth	-34	11	repressor	TF
0	rapA	Xylose Arabinose growth	-36	-5	activator	RNAP
1	rapA	Xylose Arabinose growth	-34	8	repressor	TF
0	rapA	Xanthosine growth	-36	-5	activator	RNAP
1	rapA	Xanthosine growth	-19	0	repressor	TF
0	rumB	Anaerobic growth	-45	3	activator	RNAP
0	thiM	heat shock	-42	-29	activator	-35
1	thiM	heat shock	-13	2	activator	-10
2	thiM	heat shock	-9	4	repressor	TF
0	thiM	Iron supplement	-42	2	activator	RNAP
0	thiM	LB	-42	-29	activator	-35
1	thiM	LB	-12	1	activator	-10
0	thiM	M9	-42	-29	activator	-35
1	thiM	M9	-12	2	activator	-10
0	thiM	Anaerobic growth	-46	-29	activator	-35
1	thiM	Anaerobic growth	-13	-4	activator	-10
0	thiM	acetate	-42	2	activator	RNAP
0	thiM	deoR	-12	1	repressor	TF
0	thiM	0cAMP	-46	-7	activator	RNAP
0	thiM	Trehalose growth	-42	-29	activator	-35
1	thiM	Trehalose growth	-13	2	activator	-10
0	thiM	Zinc growth	-46	-29	activator	-35
1	thiM	Zinc growth	-13	2	activator	-10
0	thiM	fum1	-35	2	activator	-10
0	thiM	Xylose Arabinose growth	-46	-29	activator	-35
1	thiM	Xylose Arabinose growth	-13	2	activator	-10
0	thiM	Xanthosine growth	-42	-29	activator	-35
1	thiM	Xanthosine growth	-12	1	activator	-10
0	minC	heat shock	-38	-31	activator	-35
1	minC	heat shock	-15	-2	activator	-10
0	minC	Iron supplement	-38	-34	activator	-35
1	minC	Iron supplement	-15	-3	activator	-10
0	minC	LB	-38	-34	activator	-35
1	minC	LB	-15	-2	activator	-10
0	minC	Anaerobic growth	-38	-2	activator	RNAP
0	minC	Trehalose growth	-38	-31	activator	-35
1	minC	Trehalose growth	-15	-1	activator	-10
0	minC	Zinc growth	-37	-31	activator	-35
1	minC	Zinc growth	-15	-1	activator	-10
0	minC	Xylose Arabinose growth	-37	-31	activator	-35
1	minC	Xylose Arabinose growth	-15	-2	activator	-10
0	minC	Xanthosine growth	-39	-29	activator	-35
1	minC	Xanthosine growth	-15	-5	activator	-10
0	arcA	Iron supplement	-103	-87	activator	RNAP
0	arcA	LB	-106	-87	activator	RNAP
1	arcA	LB	-64	-56	repressor	TF
0	arcA	Anaerobic growth	-99	-63	activator	TF
1	arcA	Anaerobic growth	-21	-8	activator	-10
0	arcA	Trehalose growth	-104	-87	activator	RNAP
0	arcA	Zinc growth	-104	-87	activator	RNAP
1	arcA	Zinc growth	-64	-56	repressor	TF
0	arcA	Xylose Arabinose growth	-104	-87	activator	RNAP
1	arcA	Xylose Arabinose growth	-64	-56	repressor	TF
0	arcA	Xanthosine growth	-114	-91	activator	RNAP
1	arcA	Xanthosine growth	-64	-56	repressor	TF
0	holC	heat shock	-35	7	activator	RNAP
0	holC	Anaerobic growth	-35	-24	activator	RNAP
0	tff-rpsB-tsf	heat shock	-90	-80	activator	RNAP
1	tff-rpsB-tsf	heat shock	-44	-35	activator	-35
2	tff-rpsB-tsf	heat shock	-18	-9	activator	-10
3	tff-rpsB-tsf	heat shock	-8	7	repressor	TF
0	tff-rpsB-tsf	Iron supplement	-44	-35	activator	-35
1	tff-rpsB-tsf	Iron supplement	-18	0	activator	-10
0	tff-rpsB-tsf	LB	-44	-31	activator	-35
1	tff-rpsB-tsf	LB	-19	-8	activator	-10
0	tff-rpsB-tsf	Anaerobic growth	-44	-35	activator	-35
1	tff-rpsB-tsf	Anaerobic growth	-19	0	activator	-10
0	tff-rpsB-tsf	phoP	-44	-31	activator	-35
1	tff-rpsB-tsf	phoP	-18	0	activator	-10
0	tff-rpsB-tsf	0cAMP	-44	-31	activator	-35
1	tff-rpsB-tsf	0cAMP	-19	0	activator	-10
0	tff-rpsB-tsf	Trehalose growth	-44	-31	activator	-35
1	tff-rpsB-tsf	Trehalose growth	-18	0	activator	-10
2	tff-rpsB-tsf	Trehalose growth	-6	7	repressor	TF
0	tff-rpsB-tsf	Zinc growth	-44	-35	activator	-35
1	tff-rpsB-tsf	Zinc growth	-19	0	activator	-10
0	tff-rpsB-tsf	Xylose Arabinose growth	-45	-36	activator	-35
1	tff-rpsB-tsf	Xylose Arabinose growth	-19	0	activator	-10
0	tff-rpsB-tsf	Xanthosine growth	-45	-31	activator	-35
1	tff-rpsB-tsf	Xanthosine growth	-19	-8	activator	-10
0	ygeR	heat shock	-54	-22	activator	-35
1	ygeR	heat shock	-14	4	activator	-10
0	ygeR	Iron supplement	-34	-23	activator	-35
1	ygeR	Iron supplement	-14	-6	activator	-10
0	ygeR	arabinose	-14	-5	activator	-10
0	ygeR	LB	-45	-33	activator	-35
1	ygeR	LB	-14	-6	activator	-10
0	ygeR	Anaerobic growth	-34	-5	activator	RNAP
0	ygeR	Zinc growth	-35	-26	activator	-35
1	ygeR	Zinc growth	-14	5	activator	-10
0	ygeR	Xylose Arabinose growth	-42	-5	activator	RNAP
0	ygeR	Xanthosine growth	-34	5	activator	RNAP
0	xylA	Xylose Arabinose growth	-88	-55	activator	TF
0	xylA	Xylose Arabinose growth	-55	-21	activator	TF
0	mscS	heat shock	-37	-30	activator	-35
1	mscS	heat shock	-23	-14	activator	TF
1	mscS	heat shock	-14	-6	activator	-10
0	mscS	Iron supplement	-19	-6	activator	-10
0	mscS	LB	-47	0	activator	RNAP
0	mscS	Zinc growth	-23	-14	activator	TF
0	mscS	Zinc growth	-14	-6	activator	-10
0	mscS	Xylose Arabinose growth	-39	-37	activator	-35
1	mscS	Xylose Arabinose growth	-22	-14	activator	TF
1	mscS	Xylose Arabinose growth	-14	-6	activator	-10
0	mscS	Xanthosine growth	-23	-14	activator	TF
0	mscS	Xanthosine growth	-14	-7	activator	-10
0	marR	LB	-84	-65	activator	TF
1	marR	LB	-46	-40	activator	-35
2	marR	LB	-23	-18	activator	-10
3	marR	LB	-34	-24	repressor	TF
4	marR	LB	-14	14	repressor	TF
0	fdhE	heat shock	-115	-99	activator	RNAP
0	fdhE	Iron supplement	-12	-8	activator	-10
1	fdhE	Iron supplement	-46	-33	repressor	TF
0	fdhE	LB	-19	-8	activator	-10
0	fdhE	M9	-115	-99	activator	RNAP
0	fdhE	Anaerobic growth	-50	-34	activator	TF
1	fdhE	Anaerobic growth	-19	4	activator	-10
0	fdhE	Trehalose growth	-19	-8	activator	-10
0	fdhE	Zinc growth	-19	-8	activator	-10
0	fdhE	Xylose Arabinose growth	-19	-8	activator	-10
1	fdhE	Xylose Arabinose growth	-48	-33	repressor	TF
0	fdhE	Xanthosine growth	-19	-1	activator	-10
1	fdhE	Xanthosine growth	-46	-33	repressor	TF
0	ykgE	heat shock	-45	-16	repressor	TF
1	ykgE	heat shock	-72	-37	activator	RNAP
0	ykgE	Iron supplement	-72	-37	activator	RNAP
1	ykgE	Iron supplement	-45	-16	repressor	TF
0	ykgE	LB	-72	-37	activator	RNAP
1	ykgE	LB	-45	-22	repressor	TF
0	ykgE	M9	-45	-22	repressor	TF
1	ykgE	M9	-65	-59	activator	-35
2	ykgE	M9	-48	-37	repressor	-10
0	ykgE	Anaerobic growth	-102	-80	activator	TF
1	ykgE	Anaerobic growth	-75	-36	activator	RNAP
2	ykgE	Anaerobic growth	-44	-22	repressor	TF
0	ykgE	Trehalose growth	-98	-90	activator	TF
1	ykgE	Trehalose growth	-72	-37	activator	RNAP
2	ykgE	Trehalose growth	-44	-22	repressor	TF
0	ykgE	Zinc growth	-74	-37	activator	RNAP
1	ykgE	Zinc growth	-44	-22	repressor	TF
0	ykgE	Xylose Arabinose growth	-74	-36	activator	RNAP
1	ykgE	Xylose Arabinose growth	-44	-22	repressor	TF
0	ykgE	Xanthosine growth	-72	-37	activator	RNAP
1	ykgE	Xanthosine growth	-44	-16	repressor	TF
0	mutM	LB	-23	-9	repressor	TF
0	ftsK	Iron supplement	-16	-11	activator	-10
0	ftsK	LB	-48	-11	activator	RNAP
1	ftsK	Anaerobic growth	-16	-11	activator	-10
0	ftsK	Zinc growth	-16	-11	activator	-10
0	ftsK	Xylose Arabinose growth	-38	-35	activator	-35
1	ftsK	Xylose Arabinose growth	-16	-11	activator	-10
0	ftsK	Xanthosine growth	-48	-35	activator	-35
1	ftsK	Xanthosine growth	-21	-11	activator	-10
0	ftsK	acetate	-8	4	repressor	TF
0	maoP	heat shock	-79	-71	activator	TF
1	maoP	heat shock	-60	-5	activator	RNAP
2	maoP	heat shock	-24	-11	repressor	TF
0	maoP	Iron supplement	-79	-55	activator	TF
0	maoP	Iron supplement	-55	-35	activator	TF
0	maoP	Iron supplement	-24	-8	activator	-10
1	maoP	Iron supplement	-24	-13	repressor	TF
0	maoP	LB	-79	-55	activator	TF
0	maoP	LB	-55	-35	activator	TF
0	maoP	LB	-24	-8	activator	-10
0	maoP	M9	-22	-12	repressor	TF
0	maoP	Anaerobic growth	-80	-17	activator	TF
0	maoP	phoP	-100	-71	activator	TF
0	maoP	0cAMP	-79	-55	activator	TF
0	maoP	0cAMP	-55	-35	activator	TF
0	maoP	0cAMP	-24	-8	activator	-10
0	maoP	Zinc growth	-80	-55	activator	TF
0	maoP	Zinc growth	-55	-35	activator	TF
0	maoP	Zinc growth	-24	-5	activator	-10
1	maoP	Zinc growth	-24	-13	repressor	TF
0	maoP	Xylose Arabinose growth	-79	-55	activator	TF
0	maoP	Xylose Arabinose growth	-55	-35	activator	TF
0	maoP	Xylose Arabinose growth	-24	-6	activator	-10
1	maoP	Xylose Arabinose growth	-22	-13	repressor	TF
0	maoP	Xanthosine growth	-72	-59	activator	TF
1	maoP	Xanthosine growth	-51	-35	activator	TF
1	maoP	Xanthosine growth	-35	-6	activator	-10
2	maoP	Xanthosine growth	-25	-13	repressor	TF

## Sheet: 7_Identified Regions
#This file contains the raw output from the automated TF binding site algorithm.
#Energy matrices for all these identified sites can be found in the github associated with RegSeq.
#Start and end locations are given with respect to the presumed TSS locations (listed in Supplementary Table 1).
#The manual selection column shows
	gene	growth	start	end	type	Automatically identified as RNAP
0	ynaI	heat shock	-14	-7	act	TRUE
0	ynaI	Iron supplement	-36	-32	act	FALSE
1	ynaI	Iron supplement	-16	1	act	TRUE
2	ynaI	Iron supplement	-40	-35	rep	FALSE
0	ynaI	LB	-48	-6	act	TRUE
0	ynaI	Anaerobic growth	-79	-7	act	TRUE
1	ynaI	Anaerobic growth	-22	-13	rep	TRUE
0	ynaI	Trehalose	-44	-6	act	TRUE
0	ynaI	Zinc supplement	-34	-7	act	TRUE
0	ynaI	Xylose Arabinose	-36	-7	act	TRUE
0	ynaI	Xanthosine	-39	1	act	TRUE
0	yehT	heat shock	-18	-7	act	TRUE
1	yehT	heat shock	-46	-33	rep	FALSE
0	yehT	Iron supplement	-18	-7	act	TRUE
1	yehT	Iron supplement	5	15	act	TRUE
0	yehT	LB	-18	-7	act	TRUE
1	yehT	LB	-42	-33	rep	FALSE
0	yehT	Anaerobic growth	-43	-33	rep	FALSE
0	yehT	Trehalose	-46	-33	act	FALSE
1	yehT	Trehalose	-12	-4	rep	TRUE
0	yehT	Zinc supplement	-18	1	act	TRUE
1	yehT	Zinc supplement	-42	-33	rep	FALSE
0	yehT	Xylose Arabinose	-18	2	act	TRUE
1	yehT	Xylose Arabinose	-42	-33	rep	FALSE
0	yehT	Xanthosine	-42	-23	rep	TRUE
0	ycgB	heat shock	-27	-6	act	TRUE
0	ycgB	M9	-17	2	act	TRUE
0	ycgB	Zinc supplement	-20	-7	act	TRUE
0	ycgB	Xylose Arabinose	-13	-7	act	TRUE
0	xylF	LB	-37	-10	rep	FALSE
0	xylF	Trehalose	-32	-20	act	FALSE
0	xylF	Zinc supplement	-37	-11	act	FALSE
0	xylF	Xylose Arabinose	-78	-27	act	FALSE
0	xylF	Xanthosine	-37	-12	rep	FALSE
0	aegA	M9	-75	-64	act	TRUE
1	aegA	M9	-6	2	act	FALSE
0	aegA	Anaerobic growth	-34	-21	act	TRUE
0	aegA	Xylose Arabinose	-13	6	act	TRUE
0	sdiA	heat shock	-63	-48	act	TRUE
0	sdiA	Iron supplement	-83	-71	act	TRUE
1	sdiA	Iron supplement	-66	-56	rep	TRUE
2	sdiA	Iron supplement	-30	-16	rep	FALSE
0	sdiA	LB	-79	-48	act	TRUE
1	sdiA	LB	-67	-30	rep	TRUE
0	sdiA	Anaerobic growth	-85	-37	act	TRUE
1	sdiA	Anaerobic growth	-60	-41	rep	TRUE
0	sdiA	Zinc supplement	-79	-72	act	TRUE
1	sdiA	Zinc supplement	-63	-48	act	TRUE
2	sdiA	Zinc supplement	-59	-41	rep	TRUE
0	sdiA	Xylose Arabinose	-79	-72	act	TRUE
1	sdiA	Xylose Arabinose	-63	-48	act	TRUE
2	sdiA	Xylose Arabinose	-60	-41	rep	TRUE
0	sdiA	Xanthosine	-83	-72	act	TRUE
1	sdiA	Xanthosine	-62	-48	act	TRUE
2	sdiA	Xanthosine	-29	-15	act	FALSE
3	sdiA	Xanthosine	-59	-56	rep	TRUE
0	groSL	heat shock	-52	-1	act	TRUE
0	groSL	Iron supplement	-20	-6	act	TRUE
1	groSL	Iron supplement	9	22	act	TRUE
0	groSL	M9	23	29	act	TRUE
0	groSL	Anaerobic growth	-46	-33	act	TRUE
1	groSL	Anaerobic growth	-17	-6	act	TRUE
2	groSL	Anaerobic growth	10	25	act	TRUE
0	groSL	phoP	-41	-34	act	TRUE
1	groSL	phoP	-17	-1	act	TRUE
2	groSL	phoP	8	18	act	TRUE
0	groSL	fum1	-51	-25	act	TRUE
0	groSL	Xylose Arabinose	10	22	act	TRUE
0	groSL	Xanthosine	-39	-14	act	TRUE
1	groSL	Xanthosine	5	22	act	TRUE
2	groSL	Xanthosine	-20	-9	rep	TRUE
0	idnK	heat shock	-41	-27	act	TRUE
1	idnK	heat shock	-14	1	rep	TRUE
0	idnK	Iron supplement	-13	1	act	TRUE
1	idnK	Iron supplement	-48	-27	rep	TRUE
0	idnK	LB	-43	-30	act	TRUE
1	idnK	LB	-14	1	act	TRUE
2	idnK	LB	-48	-27	rep	TRUE
0	idnK	Anaerobic growth	-45	-36	act	FALSE
1	idnK	Anaerobic growth	-24	5	act	TRUE
2	idnK	Anaerobic growth	-48	-32	rep	FALSE
0	idnK	0cAMP	-79	-72	act	FALSE
1	idnK	0cAMP	-38	-33	rep	FALSE
0	idnK	Trehalose	-44	-36	act	FALSE
1	idnK	Trehalose	-17	-8	act	TRUE
2	idnK	Trehalose	-48	-32	rep	FALSE
0	idnK	Zinc supplement	-13	1	act	TRUE
1	idnK	Zinc supplement	-48	-32	rep	FALSE
0	idnK	Xylose Arabinose	-44	-36	act	FALSE
1	idnK	Xylose Arabinose	-13	1	act	TRUE
2	idnK	Xylose Arabinose	-48	-27	rep	TRUE
0	idnK	Xanthosine	-43	-30	act	TRUE
1	idnK	Xanthosine	-16	-8	act	TRUE
2	idnK	Xanthosine	-48	-32	rep	FALSE
0	yedJ	heat shock	-58	-6	act	TRUE
0	yedJ	Iron supplement	-54	-18	act	TRUE
1	yedJ	Iron supplement	-31	-23	rep	TRUE
0	yedJ	LB	-54	-49	act	FALSE
1	yedJ	LB	-34	-20	act	TRUE
2	yedJ	LB	-31	-29	rep	TRUE
0	yedJ	Anaerobic growth	-63	-20	act	TRUE
1	yedJ	Anaerobic growth	-40	-12	rep	TRUE
0	yedJ	Trehalose	-54	-45	act	TRUE
1	yedJ	Trehalose	-34	-20	act	TRUE
2	yedJ	Trehalose	-31	-12	rep	TRUE
0	yedJ	Zinc supplement	-63	-17	act	TRUE
1	yedJ	Zinc supplement	-40	-12	rep	TRUE
0	yedJ	Xylose Arabinose	-54	-17	act	TRUE
1	yedJ	Xylose Arabinose	-40	-23	rep	TRUE
0	yedJ	Xanthosine	-63	-43	act	TRUE
1	yedJ	Xanthosine	-34	-20	act	TRUE
2	yedJ	Xanthosine	-40	-23	rep	TRUE
0	yicI	heat shock	-112	-100	act	FALSE
1	yicI	heat shock	-39	-16	act	FALSE
2	yicI	heat shock	-5	18	act	FALSE
0	yicI	Iron supplement	-111	-95	act	FALSE
1	yicI	Iron supplement	-65	-57	act	FALSE
2	yicI	Iron supplement	-40	-10	act	FALSE
3	yicI	Iron supplement	-5	15	act	FALSE
0	yicI	LB	-112	-96	act	FALSE
1	yicI	LB	-39	-28	act	FALSE
0	yicI	Anaerobic growth	-30	-16	act	FALSE
1	yicI	Anaerobic growth	3	7	act	FALSE
0	yicI	Trehalose	-65	-62	act	FALSE
1	yicI	Trehalose	-40	-16	act	FALSE
2	yicI	Trehalose	-5	18	act	FALSE
0	yicI	Zinc supplement	-43	-16	act	FALSE
1	yicI	Zinc supplement	-5	7	act	FALSE
0	yicI	Xylose Arabinose	-30	-16	act	FALSE
1	yicI	Xylose Arabinose	3	4	act	FALSE
0	yicI	Xanthosine	-30	-16	act	FALSE
1	yicI	Xanthosine	3	7	act	FALSE
0	htrB	LB	-47	-35	act	FALSE
1	htrB	LB	-17	-6	act	TRUE
2	htrB	LB	-44	-30	rep	FALSE
0	fdoH	heat shock	-114	-102	act	FALSE
0	fdoH	Iron supplement	-114	-102	act	FALSE
0	fdoH	LB	-114	-102	act	FALSE
0	fdoH	Anaerobic growth	-114	-101	act	FALSE
0	fdoH	Trehalose	-114	-106	act	FALSE
0	fdoH	Zinc supplement	-114	-102	act	FALSE
0	fdoH	Xylose Arabinose	-114	-102	act	FALSE
0	fdoH	Xanthosine	-114	-102	act	FALSE
0	iap	heat shock	-12	-6	act	TRUE
0	iap	Iron supplement	-12	29	act	TRUE
1	iap	Iron supplement	-23	-5	rep	TRUE
2	iap	Iron supplement	24	29	rep	FALSE
0	iap	LB	-12	10	act	TRUE
1	iap	LB	-28	-13	rep	TRUE
2	iap	LB	22	29	rep	FALSE
0	iap	Anaerobic growth	-17	10	act	TRUE
1	iap	Anaerobic growth	23	29	act	FALSE
2	iap	Anaerobic growth	-24	-13	rep	TRUE
3	iap	Anaerobic growth	28	29	rep	FALSE
0	iap	Zinc supplement	-12	10	act	TRUE
1	iap	Zinc supplement	-23	0	rep	TRUE
2	iap	Zinc supplement	24	29	rep	FALSE
0	iap	Xylose Arabinose	-12	29	act	TRUE
1	iap	Xylose Arabinose	-23	-5	rep	TRUE
2	iap	Xylose Arabinose	22	29	rep	FALSE
0	iap	Xanthosine	-17	6	act	TRUE
1	iap	Xanthosine	-23	-1	rep	TRUE
2	iap	Xanthosine	22	29	rep	FALSE
0	ybeZ	heat shock	-38	-11	act	TRUE
0	ybeZ	Iron supplement	-7	29	act	TRUE
1	ybeZ	Iron supplement	15	29	rep	TRUE
0	ybeZ	LB	4	17	act	TRUE
1	ybeZ	LB	21	29	act	TRUE
2	ybeZ	LB	19	29	rep	TRUE
0	ybeZ	Anaerobic growth	3	29	act	TRUE
1	ybeZ	Anaerobic growth	15	29	rep	TRUE
0	ybeZ	Trehalose	3	29	act	TRUE
1	ybeZ	Trehalose	15	29	rep	TRUE
0	ybeZ	Zinc supplement	4	9	act	FALSE
1	ybeZ	Zinc supplement	25	29	act	TRUE
2	ybeZ	Zinc supplement	27	29	rep	TRUE
0	ybeZ	Xylose Arabinose	-5	8	act	FALSE
1	ybeZ	Xylose Arabinose	25	29	act	TRUE
2	ybeZ	Xylose Arabinose	27	29	rep	TRUE
0	ybeZ	Xanthosine	25	29	act	TRUE
1	ybeZ	Xanthosine	22	29	rep	TRUE
0	araAB	heat shock	-76	-65	act	TRUE
0	araAB	arabinose	-102	3	act	TRUE
0	araAB	LB	-78	-63	rep	TRUE
0	araAB	Anaerobic growth	-78	-73	rep	TRUE
0	araAB	Zinc supplement	-90	-64	rep	TRUE
0	araAB	Xylose Arabinose	-98	-29	act	TRUE
1	araAB	Xylose Arabinose	-14	-8	act	TRUE
0	araAB	Xanthosine	-76	-69	rep	TRUE
0	rlmA	heat shock	-78	-51	act	TRUE
1	rlmA	heat shock	-92	-79	rep	TRUE
0	rlmA	Iron supplement	-9	-4	act	TRUE
1	rlmA	Iron supplement	18	23	act	FALSE
0	rlmA	LB	-35	-5	act	TRUE
0	rlmA	Anaerobic growth	-40	-5	act	TRUE
0	rlmA	Trehalose	-70	-51	act	TRUE
0	rlmA	Xylose Arabinose	-70	-51	act	TRUE
1	rlmA	Xylose Arabinose	-10	-5	act	TRUE
0	rlmA	Xanthosine	-10	-5	act	TRUE
0	hslU	heat shock	-33	5	act	TRUE
0	mscL	heat shock	-32	6	act	TRUE
0	mscL	Iron supplement	-16	-7	act	TRUE
0	mscL	LB	-17	-7	act	TRUE
0	mscL	M9	-23	-9	act	TRUE
0	mscL	Zinc supplement	-23	-9	act	TRUE
1	mscL	Zinc supplement	-18	-17	rep	FALSE
0	mscL	Xylose Arabinose	-30	-9	act	TRUE
1	mscL	Xylose Arabinose	-18	-6	rep	TRUE
0	mscL	Xanthosine	-16	-7	act	TRUE
0	zapB	heat shock	-45	-32	act	FALSE
1	zapB	heat shock	-14	3	act	TRUE
0	zapB	Iron supplement	-51	3	act	TRUE
1	zapB	Iron supplement	-18	-8	rep	TRUE
0	zapB	LB	-51	-8	act	TRUE
1	zapB	LB	-18	-8	rep	TRUE
0	zapB	M9	-39	-32	act	FALSE
1	zapB	M9	-14	3	act	TRUE
0	zapB	Anaerobic growth	-51	3	act	TRUE
1	zapB	Anaerobic growth	-18	-8	rep	TRUE
0	zapB	acetate	-45	3	act	TRUE
1	zapB	acetate	-18	-8	rep	TRUE
0	zapB	phoP	-40	-32	act	FALSE
1	zapB	phoP	-14	-4	act	TRUE
2	zapB	phoP	-18	-6	rep	TRUE
0	zapB	0cAMP	-50	1	act	TRUE
0	zapB	Trehalose	-38	-8	act	TRUE
1	zapB	Trehalose	-18	-15	rep	TRUE
0	zapB	Zinc supplement	-51	-8	act	TRUE
1	zapB	Zinc supplement	3	29	act	FALSE
2	zapB	Zinc supplement	-18	-3	rep	TRUE
0	zapB	Xylose Arabinose	-38	-8	act	TRUE
1	zapB	Xylose Arabinose	-19	-3	rep	TRUE
0	zapB	Xanthosine	-38	-8	act	TRUE
1	zapB	Xanthosine	-19	-3	rep	TRUE
0	yqhC	heat shock	-94	-93	act	FALSE
1	yqhC	heat shock	0	20	act	TRUE
0	yqhC	Iron supplement	2	17	act	TRUE
1	yqhC	Iron supplement	-94	-88	rep	TRUE
2	yqhC	Iron supplement	0	20	act	TRUE
0	yqhC	LB	-43	-26	act	FALSE
1	yqhC	LB	-9	5	act	FALSE
2	yqhC	LB	9	13	act	TRUE
0	yqhC	M9	-94	-93	act	FALSE
1	yqhC	M9	0	20	act	TRUE
0	yqhC	Anaerobic growth	2	16	act	TRUE
1	yqhC	Anaerobic growth	0	20	rep	TRUE
0	yqhC	Trehalose	-94	-93	act	FALSE
1	yqhC	Trehalose	0	20	act	TRUE
0	yqhC	Zinc supplement	-94	-93	act	FALSE
1	yqhC	Zinc supplement	0	20	act	TRUE
0	yqhC	fum1	-101	-86	act	TRUE
0	yqhC	Xylose Arabinose	-94	-93	rep	FALSE
1	yqhC	Xylose Arabinose	0	20	act	TRUE
0	yqhC	Xanthosine	-94	-93	act	FALSE
1	yqhC	Xanthosine	0	20	act	TRUE
0	ydhO	Zinc supplement	7	23	act	TRUE
1	ydhO	Zinc supplement	-11	-2	rep	FALSE
0	yehS	heat shock	-2	12	act	TRUE
0	yehS	Iron supplement	-2	12	act	TRUE
0	yehS	LB	-22	17	act	TRUE
1	yehS	LB	-16	-12	rep	FALSE
0	yehS	M9	-4	17	act	TRUE
0	yehS	Anaerobic growth	-25	17	act	TRUE
0	yehS	Trehalose	-2	12	act	TRUE
0	yehS	Zinc supplement	-14	17	act	TRUE
1	yehS	Zinc supplement	-16	-10	rep	TRUE
0	yehS	Xylose Arabinose	-25	17	act	TRUE
1	yehS	Xylose Arabinose	-16	-10	rep	TRUE
0	yehS	Xanthosine	-25	12	act	TRUE
1	yehS	Xanthosine	-16	-7	rep	TRUE
0	dgoR	LB	-107	-100	act	FALSE
1	dgoR	LB	-94	-85	rep	FALSE
0	asnA	heat shock	-13	3	act	TRUE
0	asnA	Iron supplement	-22	1	act	TRUE
0	asnA	LB	-22	-5	act	TRUE
0	asnA	Anaerobic growth	-13	3	act	TRUE
0	asnA	Zinc supplement	-22	-5	act	TRUE
0	asnA	Xylose Arabinose	-22	3	act	TRUE
0	asnA	Xanthosine	-22	-5	act	TRUE
1	asnA	Xanthosine	14	29	act	FALSE
0	rcsF	Iron supplement	-71	-58	act	FALSE
1	rcsF	Iron supplement	-36	-28	act	TRUE
2	rcsF	Iron supplement	-15	4	act	TRUE
3	rcsF	Iron supplement	16	29	act	FALSE
0	rcsF	LB	-36	-26	act	TRUE
1	rcsF	LB	-15	9	act	TRUE
2	rcsF	LB	-24	-11	rep	TRUE
0	rcsF	Anaerobic growth	-36	-29	act	TRUE
1	rcsF	Anaerobic growth	-14	-3	act	TRUE
2	rcsF	Anaerobic growth	-24	-11	rep	TRUE
0	rcsF	Trehalose	-63	-58	act	FALSE
1	rcsF	Trehalose	16	29	act	FALSE
0	rcsF	Zinc supplement	-70	-58	act	TRUE
1	rcsF	Zinc supplement	-46	-28	act	TRUE
2	rcsF	Zinc supplement	-14	-2	act	TRUE
3	rcsF	Zinc supplement	9	29	act	FALSE
0	rcsF	fum1	-9	29	act	TRUE
0	rcsF	Xylose Arabinose	-63	-53	act	FALSE
1	rcsF	Xylose Arabinose	-36	-30	act	FALSE
2	rcsF	Xylose Arabinose	-15	7	act	TRUE
0	rcsF	Xanthosine	-71	-53	act	FALSE
1	rcsF	Xanthosine	-14	-2	act	TRUE
0	ybiP	heat shock	-8	1	act	TRUE
0	ybiP	Iron supplement	-8	1	rep	TRUE
0	lac	LB	-114	-90	act	FALSE
1	lac	LB	-77	-71	act	TRUE
2	lac	LB	-52	-47	act	TRUE
0	ompR	M9	-3	23	act	FALSE
0	ompR	acetate	-37	-35	act	FALSE
1	ompR	acetate	27	29	act	FALSE
2	ompR	acetate	-113	-94	rep	FALSE
3	ompR	acetate	-56	-25	rep	TRUE
4	ompR	acetate	-1	13	rep	FALSE
0	ompR	Xanthosine	-1	15	act	FALSE
0	bdcR	heat shock	-47	-3	act	TRUE
1	bdcR	heat shock	-25	1	rep	TRUE
0	bdcR	Iron supplement	-47	-1	act	TRUE
1	bdcR	Iron supplement	-27	-5	rep	TRUE
0	bdcR	LB	-35	-7	act	TRUE
1	bdcR	LB	-27	1	rep	TRUE
0	bdcR	M9	-42	-28	act	TRUE
1	bdcR	M9	-16	-7	act	TRUE
0	bdcR	Anaerobic growth	-47	-7	act	TRUE
1	bdcR	Anaerobic growth	-27	1	rep	TRUE
0	bdcR	deoR	-42	0	act	TRUE
1	bdcR	deoR	-22	-6	rep	TRUE
0	bdcR	Trehalose	-47	-7	act	TRUE
1	bdcR	Trehalose	-27	-4	rep	TRUE
0	bdcR	Zinc supplement	-47	-7	act	TRUE
1	bdcR	Zinc supplement	-27	-5	rep	TRUE
0	bdcR	Xylose Arabinose	-47	-7	act	TRUE
1	bdcR	Xylose Arabinose	-27	1	rep	TRUE
0	bdcR	Xanthosine	-47	3	act	TRUE
1	bdcR	Xanthosine	-25	1	rep	TRUE
0	yehU	heat shock	-55	-27	act	TRUE
0	yehU	LB	-18	-3	act	TRUE
0	yehU	Anaerobic growth	-62	7	act	TRUE
0	yehU	Zinc supplement	-81	-69	act	FALSE
1	yehU	Zinc supplement	-9	-3	act	TRUE
2	yehU	Zinc supplement	-55	-34	rep	TRUE
0	yehU	Xylose Arabinose	-83	-69	act	FALSE
1	yehU	Xylose Arabinose	-56	-42	act	TRUE
2	yehU	Xylose Arabinose	-20	-3	act	TRUE
3	yehU	Xylose Arabinose	-55	-32	rep	TRUE
0	yehU	Xanthosine	-78	-63	act	TRUE
1	yehU	Xanthosine	-56	-38	act	TRUE
2	yehU	Xanthosine	-19	-3	act	TRUE
0	WaaA-coaD	LB	-50	-32	act	TRUE
1	WaaA-coaD	LB	-14	2	act	TRUE
2	WaaA-coaD	LB	-23	-12	rep	TRUE
0	WaaA-coaD	M9	-13	1	act	TRUE
0	WaaA-coaD	Anaerobic growth	-44	-32	act	TRUE
1	WaaA-coaD	Anaerobic growth	-14	5	act	TRUE
0	WaaA-coaD	Zinc supplement	-50	-32	act	TRUE
1	WaaA-coaD	Zinc supplement	-13	-1	act	TRUE
0	WaaA-coaD	Xylose Arabinose	-53	-1	act	TRUE
0	WaaA-coaD	Xanthosine	-53	-9	act	TRUE
0	ygdH	heat shock	-44	-8	act	TRUE
1	ygdH	heat shock	-29	-9	rep	TRUE
0	ygdH	Iron supplement	-37	-8	act	TRUE
1	ygdH	Iron supplement	26	29	act	TRUE
2	ygdH	Iron supplement	-29	-9	rep	TRUE
0	ygdH	LB	-37	-7	act	TRUE
1	ygdH	LB	-27	-9	rep	TRUE
0	ygdH	Anaerobic growth	-37	-7	act	TRUE
1	ygdH	Anaerobic growth	-27	-9	rep	TRUE
0	ygdH	Trehalose	-37	-7	act	TRUE
1	ygdH	Trehalose	-29	-9	rep	TRUE
0	ygdH	Zinc supplement	-37	-7	act	TRUE
1	ygdH	Zinc supplement	-29	-9	rep	TRUE
0	ygdH	Xylose Arabinose	-37	-7	act	TRUE
1	ygdH	Xylose Arabinose	-29	-9	rep	TRUE
0	ygdH	Xanthosine	-37	-7	act	TRUE
1	ygdH	Xanthosine	-29	-9	rep	TRUE
0	znuA	heat shock	8	19	rep	TRUE
0	znuA	Iron supplement	4	29	act	TRUE
1	znuA	Iron supplement	20	29	rep	FALSE
0	znuA	Anaerobic growth	5	29	act	TRUE
0	znuA	Trehalose	13	28	act	TRUE
0	znuA	Zinc supplement	8	19	act	TRUE
0	znuA	Xylose Arabinose	8	29	act	TRUE
1	znuA	Xylose Arabinose	18	29	rep	FALSE
0	znuA	Xanthosine	8	29	act	TRUE
1	znuA	Xanthosine	18	29	rep	FALSE
0	uvrD	Iron supplement	28	29	act	FALSE
1	uvrD	Iron supplement	-32	-31	rep	FALSE
0	uvrD	LB	-15	-8	act	TRUE
1	uvrD	LB	-32	-31	rep	FALSE
0	uvrD	Anaerobic growth	28	29	act	FALSE
1	uvrD	Anaerobic growth	-39	-31	rep	FALSE
0	uvrD	0cAMP	-43	-29	act	TRUE
1	uvrD	0cAMP	-13	-8	act	TRUE
0	uvrD	Zinc supplement	-32	-31	rep	FALSE
0	uvrD	Xylose Arabinose	-32	-31	rep	FALSE
0	uvrD	Xanthosine	-15	-8	act	TRUE
1	uvrD	Xanthosine	28	29	act	FALSE
2	uvrD	Xanthosine	-32	-31	rep	FALSE
20	uvrD	acetate	22	29	act	FALSE
21	uvrD	acetate	6	14	rep	FALSE
22	uvrD	acetate	26	29	rep	FALSE
0	modE	LB	-25	-11	act	TRUE
0	modE	Anaerobic growth	-37	-19	act	TRUE
0	modE	Xylose Arabinose	-35	-19	act	TRUE
0	modE	Xanthosine	-106	-97	rep	FALSE
0	ygjP	heat shock	-28	-12	act	TRUE
1	ygjP	heat shock	-30	-22	rep	TRUE
0	ygjP	Iron supplement	-33	-19	act	TRUE
0	ygjP	LB	-61	-12	act	TRUE
1	ygjP	LB	-30	-18	rep	TRUE
0	ygjP	M9	-27	-12	act	TRUE
1	ygjP	M9	-30	-22	rep	TRUE
0	ygjP	Anaerobic growth	-61	-46	act	FALSE
1	ygjP	Anaerobic growth	-28	-19	act	TRUE
2	ygjP	Anaerobic growth	-30	-18	rep	TRUE
0	ygjP	Zinc supplement	-28	-19	act	TRUE
1	ygjP	Zinc supplement	-47	-18	rep	TRUE
0	ygjP	Xylose Arabinose	-61	-46	act	FALSE
1	ygjP	Xylose Arabinose	-28	-19	act	TRUE
2	ygjP	Xylose Arabinose	-47	-44	rep	FALSE
3	ygjP	Xylose Arabinose	-30	-18	rep	TRUE
0	ygjP	Xanthosine	-50	-19	act	TRUE
1	ygjP	Xanthosine	-40	-18	rep	TRUE
0	yggW	heat shock	-36	-30	act	TRUE
1	yggW	heat shock	-16	1	act	TRUE
0	tig	heat shock	-36	-7	act	TRUE
1	tig	heat shock	-41	-20	rep	TRUE
2	tig	heat shock	-15	1	rep	TRUE
0	tig	Iron supplement	-36	-30	act	TRUE
1	tig	Iron supplement	-14	-6	act	TRUE
2	tig	Iron supplement	-40	-20	rep	TRUE
0	tig	LB	-36	-6	act	TRUE
1	tig	LB	-40	-29	rep	TRUE
0	tig	Anaerobic growth	-36	-6	act	TRUE
1	tig	Anaerobic growth	-41	-29	rep	TRUE
0	tig	phoP	-36	-6	act	TRUE
0	tig	Trehalose	-36	-31	act	TRUE
1	tig	Trehalose	-14	-7	act	TRUE
2	tig	Trehalose	-41	-29	rep	TRUE
0	tig	Zinc supplement	-36	-6	act	TRUE
1	tig	Zinc supplement	-40	-29	rep	TRUE
0	tig	Xylose Arabinose	-36	-6	act	TRUE
1	tig	Xylose Arabinose	-41	-29	rep	TRUE
0	tig	Xanthosine	-36	-6	act	TRUE
1	tig	Xanthosine	-41	-20	rep	TRUE
0	dicC	heat shock	-35	-30	act	FALSE
1	dicC	heat shock	-12	-6	act	TRUE
2	dicC	heat shock	-6	10	rep	TRUE
0	dicC	Iron supplement	-45	-30	act	FALSE
1	dicC	Iron supplement	-12	-6	act	TRUE
2	dicC	Iron supplement	-13	10	rep	TRUE
0	dicC	LB	-41	-30	act	FALSE
1	dicC	LB	-12	-6	act	TRUE
0	dicC	Anaerobic growth	-36	-30	act	FALSE
1	dicC	Anaerobic growth	-12	-6	act	TRUE
0	dicC	acetate	-48	-28	act	TRUE
1	dicC	acetate	-12	-6	act	TRUE
2	dicC	acetate	-13	10	rep	TRUE
0	dicC	Trehalose	-35	-30	act	FALSE
1	dicC	Trehalose	-12	-6	act	TRUE
2	dicC	Trehalose	-6	10	rep	TRUE
0	dicC	Zinc supplement	-45	-30	act	FALSE
1	dicC	Zinc supplement	-12	-6	act	TRUE
2	dicC	Zinc supplement	-6	8	rep	TRUE
0	dicC	Xylose Arabinose	-45	-30	act	FALSE
1	dicC	Xylose Arabinose	-12	-6	act	TRUE
2	dicC	Xylose Arabinose	-13	10	rep	TRUE
0	dicC	Xanthosine	-43	-28	act	TRUE
1	dicC	Xanthosine	-12	-6	act	TRUE
2	dicC	Xanthosine	-5	10	rep	FALSE
0	ydjA	heat shock	-37	-9	act	TRUE
1	ydjA	heat shock	-21	1	rep	TRUE
0	ydjA	Iron supplement	-39	-36	act	TRUE
1	ydjA	Iron supplement	-20	-9	act	TRUE
2	ydjA	Iron supplement	-11	5	rep	TRUE
0	ydjA	LB	-49	-9	act	TRUE
1	ydjA	LB	-21	-3	rep	TRUE
0	ydjA	Anaerobic growth	-24	-9	act	TRUE
1	ydjA	Anaerobic growth	-11	1	rep	TRUE
0	ydjA	Trehalose	-24	-9	act	TRUE
1	ydjA	Trehalose	-10	1	rep	TRUE
0	ydjA	Zinc supplement	-29	-9	act	TRUE
1	ydjA	Zinc supplement	-10	-3	rep	TRUE
0	ydjA	Xylose Arabinose	-37	-34	act	TRUE
1	ydjA	Xylose Arabinose	-20	-9	act	TRUE
2	ydjA	Xylose Arabinose	-21	1	rep	TRUE
0	ydjA	Xanthosine	-37	-9	act	TRUE
1	ydjA	Xanthosine	-21	1	rep	TRUE
0	ybjT	heat shock	-36	-25	act	TRUE
0	ybjT	Iron supplement	-36	-30	act	TRUE
1	ybjT	Iron supplement	-18	-9	act	TRUE
0	ybjT	LB	-36	-30	act	TRUE
1	ybjT	LB	-18	-9	act	TRUE
2	ybjT	LB	-16	-8	rep	TRUE
0	ybjT	Anaerobic growth	-43	-9	act	TRUE
0	ybjT	Zinc supplement	-36	-28	act	TRUE
1	ybjT	Zinc supplement	-18	-9	act	TRUE
0	ybjT	Xylose Arabinose	-36	-9	act	TRUE
1	ybjT	Xylose Arabinose	-16	-8	rep	TRUE
0	ybjT	Xanthosine	-36	-30	act	TRUE
1	ybjT	Xanthosine	-18	-9	act	TRUE
2	ybjT	Xanthosine	-16	-8	rep	TRUE
0	zupT	heat shock	-23	-13	act	TRUE
0	zupT	Iron supplement	-23	-13	act	TRUE
0	zupT	LB	-23	-3	act	TRUE
0	zupT	Anaerobic growth	-23	-2	act	TRUE
0	zupT	acetate	-23	-14	act	TRUE
0	zupT	0cAMP	-23	-3	rep	TRUE
0	zupT	Zinc supplement	-23	-13	act	TRUE
0	zupT	Xylose Arabinose	-23	-14	act	TRUE
0	zupT	Xanthosine	-23	-13	act	TRUE
0	yedK	heat shock	4	20	act	TRUE
1	yedK	heat shock	-11	25	rep	TRUE
0	yedK	Iron supplement	-3	27	act	TRUE
1	yedK	Iron supplement	-11	1	rep	TRUE
2	yedK	Iron supplement	12	17	rep	TRUE
0	yedK	LB	7	27	act	TRUE
0	yedK	M9	-11	-4	act	TRUE
1	yedK	M9	11	25	act	TRUE
2	yedK	M9	4	21	rep	TRUE
0	yedK	Anaerobic growth	-22	-10	act	FALSE
1	yedK	Anaerobic growth	7	27	act	TRUE
0	yedK	deoR	10	23	act	TRUE
1	yedK	deoR	12	25	rep	TRUE
0	yedK	Trehalose	-14	25	act	TRUE
1	yedK	Trehalose	-3	27	rep	TRUE
0	yedK	Zinc supplement	-14	24	act	TRUE
1	yedK	Zinc supplement	-3	27	rep	TRUE
0	yedK	Xylose Arabinose	4	27	act	TRUE
1	yedK	Xylose Arabinose	-14	17	rep	TRUE
0	thrLABC	heat shock	-57	-3	act	TRUE
0	thrLABC	Iron supplement	-46	-7	act	TRUE
0	thrLABC	LB	-46	-5	act	TRUE
1	thrLABC	LB	-16	-9	rep	TRUE
0	thrLABC	Anaerobic growth	-57	0	act	TRUE
0	thrLABC	Trehalose	-57	0	act	TRUE
0	thrLABC	Zinc supplement	-52	-8	act	TRUE
0	thrLABC	Xylose Arabinose	-52	-7	act	TRUE
0	thrLABC	Xanthosine	-52	0	act	TRUE
0	cra	heat shock	-12	-4	act	TRUE
0	cra	Iron supplement	-15	-8	act	TRUE
1	cra	Iron supplement	-12	-4	rep	TRUE
0	cra	LB	-18	-5	act	TRUE
1	cra	LB	-12	-3	rep	TRUE
0	cra	Anaerobic growth	-18	-8	act	TRUE
1	cra	Anaerobic growth	3	16	act	FALSE
2	cra	Anaerobic growth	-12	-4	rep	TRUE
0	cra	acetate	-19	-9	act	TRUE
0	cra	0cAMP	-12	1	rep	TRUE
0	cra	Trehalose	-21	-8	act	TRUE
0	cra	Zinc supplement	-18	-8	act	TRUE
1	cra	Zinc supplement	-12	-4	rep	TRUE
0	cra	Xylose Arabinose	-18	-8	act	TRUE
1	cra	Xylose Arabinose	-16	-4	rep	TRUE
0	cra	Xanthosine	-18	-8	act	TRUE
1	cra	Xanthosine	-16	-4	rep	TRUE
0	sbcB	heat shock	-13	-5	act	TRUE
1	sbcB	heat shock	-40	-32	rep	FALSE
0	sbcB	LB	-23	1	act	TRUE
1	sbcB	LB	-33	-29	rep	FALSE
0	sbcB	Anaerobic growth	-40	-29	rep	FALSE
0	sbcB	Trehalose	-13	-5	act	TRUE
0	sbcB	Xylose Arabinose	-12	1	act	TRUE
1	sbcB	Xylose Arabinose	-43	-25	rep	TRUE
0	sbcB	Xanthosine	-13	-1	act	TRUE
1	sbcB	Xanthosine	-43	-32	rep	FALSE
0	mscM	heat shock	24	29	act	FALSE
1	mscM	heat shock	28	29	rep	FALSE
0	mscM	Iron supplement	-36	-26	act	FALSE
1	mscM	Iron supplement	-16	-9	rep	FALSE
2	mscM	Iron supplement	20	29	rep	FALSE
0	mscM	LB	29	29	act	FALSE
0	mscM	Trehalose	20	29	rep	FALSE
0	mscM	Zinc supplement	20	29	rep	FALSE
0	mscM	Xylose Arabinose	20	29	rep	FALSE
0	pcm	Iron supplement	-13	-11	rep	TRUE
0	pcm	LB	-45	-23	act	TRUE
1	pcm	LB	-17	-7	act	TRUE
2	pcm	LB	-15	-10	rep	TRUE
0	pcm	Anaerobic growth	-103	-86	act	FALSE
1	pcm	Anaerobic growth	-46	-27	act	TRUE
2	pcm	Anaerobic growth	-16	-2	act	TRUE
3	pcm	Anaerobic growth	16	28	act	FALSE
4	pcm	Anaerobic growth	-60	-34	rep	FALSE
5	pcm	Anaerobic growth	-20	-6	rep	TRUE
0	pcm	Zinc supplement	-13	4	rep	TRUE
0	pcm	Xylose Arabinose	-17	-7	act	TRUE
1	pcm	Xylose Arabinose	-11	-10	rep	TRUE
0	pcm	Xanthosine	-18	-10	rep	TRUE
0	rspA	heat shock	-28	0	act	TRUE
0	rspA	Iron supplement	-57	-18	act	FALSE
1	rspA	Iron supplement	1	17	act	TRUE
2	rspA	Iron supplement	-28	2	rep	TRUE
0	rspA	arabinose	-57	-18	act	FALSE
1	rspA	arabinose	-5	9	act	TRUE
2	rspA	arabinose	-17	2	rep	TRUE
0	rspA	LB	-56	-19	act	FALSE
1	rspA	LB	-5	17	act	TRUE
2	rspA	LB	-28	2	rep	TRUE
0	rspA	Anaerobic growth	-57	7	act	TRUE
1	rspA	Anaerobic growth	-17	2	rep	TRUE
0	rspA	Trehalose	-57	12	act	TRUE
1	rspA	Trehalose	-17	0	rep	TRUE
0	rspA	Zinc supplement	-56	-18	act	FALSE
1	rspA	Zinc supplement	-6	7	act	TRUE
2	rspA	Zinc supplement	-17	2	rep	TRUE
0	rspA	Xylose Arabinose	-56	17	act	TRUE
1	rspA	Xylose Arabinose	-17	0	rep	TRUE
0	rspA	Xanthosine	-56	-19	act	FALSE
1	rspA	Xanthosine	-6	7	act	TRUE
2	rspA	Xanthosine	-17	0	rep	TRUE
0	ilvC	heat shock	-35	0	rep	TRUE
0	ilvC	Iron supplement	-75	-28	act	FALSE
1	ilvC	Iron supplement	-17	4	act	TRUE
2	ilvC	Iron supplement	-30	0	rep	TRUE
0	ilvC	LB	-33	0	rep	TRUE
0	ilvC	M9	-33	-11	act	TRUE
0	ilvC	Anaerobic growth	-24	0	rep	TRUE
0	ilvC	Zinc supplement	-64	-28	act	FALSE
1	ilvC	Zinc supplement	-17	-4	act	TRUE
2	ilvC	Zinc supplement	-30	0	rep	TRUE
0	ilvC	Xylose Arabinose	-56	-28	act	FALSE
1	ilvC	Xylose Arabinose	-17	2	act	TRUE
2	ilvC	Xylose Arabinose	-30	0	rep	TRUE
0	ilvC	Xanthosine	-64	-52	act	FALSE
1	ilvC	Xanthosine	-42	-28	act	FALSE
2	ilvC	Xanthosine	-17	2	act	TRUE
3	ilvC	Xanthosine	-30	0	rep	TRUE
0	araC	heat shock	-66	-38	act	TRUE
1	araC	heat shock	-40	-31	rep	TRUE
0	araC	Iron supplement	-66	-24	act	TRUE
0	araC	arabinose	-66	-24	act	TRUE
1	araC	arabinose	-47	-27	rep	TRUE
0	araC	LB	-66	-24	act	TRUE
1	araC	LB	-16	-7	act	FALSE
2	araC	LB	-40	-31	rep	TRUE
0	araC	Anaerobic growth	-84	-24	act	TRUE
1	araC	Anaerobic growth	-40	-31	rep	TRUE
0	araC	0cAMP	-114	-98	act	FALSE
1	araC	0cAMP	-51	-32	act	TRUE
0	araC	Trehalose	-66	-24	act	TRUE
1	araC	Trehalose	-40	-31	rep	TRUE
0	araC	Zinc supplement	-66	-24	act	TRUE
1	araC	Zinc supplement	-40	-33	rep	TRUE
0	araC	Xylose Arabinose	-66	-24	act	TRUE
1	araC	Xylose Arabinose	-40	-27	rep	TRUE
0	araC	Xanthosine	-66	-24	act	TRUE
1	araC	Xanthosine	-93	-86	rep	FALSE
2	araC	Xanthosine	-40	-27	rep	TRUE
0	znuCB	heat shock	-14	0	act	TRUE
0	znuCB	Iron supplement	-14	-2	rep	TRUE
0	znuCB	LB	-25	0	act	TRUE
1	znuCB	LB	-49	-34	rep	FALSE
2	znuCB	LB	-14	-3	rep	TRUE
0	znuCB	Anaerobic growth	-16	-12	act	TRUE
1	znuCB	Anaerobic growth	-14	-2	rep	TRUE
0	znuCB	Zinc supplement	-14	-2	rep	TRUE
0	znuCB	Xylose Arabinose	-18	-12	act	TRUE
1	znuCB	Xylose Arabinose	-14	0	rep	TRUE
0	znuCB	Xanthosine	-18	-8	act	TRUE
1	znuCB	Xanthosine	-18	-2	rep	TRUE
0	tar	heat shock	-5	1	act	TRUE
1	tar	heat shock	22	29	act	FALSE
0	tar	Iron supplement	18	29	rep	FALSE
0	tar	LB	22	29	act	FALSE
0	tar	M9	-11	1	act	TRUE
1	tar	M9	21	29	act	FALSE
0	tar	Trehalose	-4	10	act	TRUE
1	tar	Trehalose	22	29	act	FALSE
0	tar	Zinc supplement	-2	0	act	TRUE
0	tar	Xylose Arabinose	22	29	rep	FALSE
0	tar	Xanthosine	22	29	rep	FALSE
0	dpiBA	heat shock	-115	-103	act	FALSE
1	dpiBA	heat shock	-44	-29	act	FALSE
2	dpiBA	heat shock	-38	-17	rep	TRUE
0	dpiBA	LB	-29	-14	act	TRUE
1	dpiBA	LB	-52	-46	rep	FALSE
0	dpiBA	Anaerobic growth	-15	-11	act	FALSE
1	dpiBA	Anaerobic growth	-37	-22	rep	TRUE
0	dpiBA	Zinc supplement	-35	-14	act	TRUE
0	dpiBA	Xylose Arabinose	-37	-14	act	TRUE
0	sdaB	heat shock	-23	-2	act	FALSE
1	sdaB	heat shock	-18	-8	rep	FALSE
0	sdaB	Iron supplement	-29	-2	act	FALSE
0	sdaB	LB	-35	-24	act	FALSE
1	sdaB	LB	-47	-33	rep	FALSE
2	sdaB	LB	-23	-2	rep	FALSE
0	sdaB	M9	-27	-15	act	FALSE
0	sdaB	Anaerobic growth	-47	-33	act	FALSE
1	sdaB	Anaerobic growth	-21	-2	act	FALSE
2	sdaB	Anaerobic growth	-24	-10	rep	FALSE
0	sdaB	Trehalose	-29	-2	act	FALSE
0	sdaB	Zinc supplement	-33	-2	act	FALSE
0	sdaB	Xylose Arabinose	-23	-2	act	FALSE
1	sdaB	Xylose Arabinose	-18	-8	rep	FALSE
0	sdaB	Xanthosine	-47	-33	act	FALSE
1	sdaB	Xanthosine	-29	-15	act	FALSE
2	sdaB	Xanthosine	-18	-8	rep	FALSE
0	ymgG	SS	-51	-38	act	FALSE
0	ymgG	heat shock	-53	-34	act	FALSE
1	ymgG	heat shock	-13	2	act	TRUE
0	ymgG	M9	-111	-97	rep	FALSE
0	ymgG	Anaerobic growth	29	29	rep	FALSE
0	ymgG	Zinc supplement	-50	-31	act	FALSE
0	ymgG	Xanthosine	-56	-32	act	FALSE
1	ymgG	Xanthosine	-23	-10	rep	TRUE
0	arcB	LB	-24	-2	act	TRUE
0	arcB	Anaerobic growth	-40	-26	rep	TRUE
0	arcB	Xylose Arabinose	-60	-7	act	TRUE
1	arcB	Xylose Arabinose	-24	0	rep	TRUE
0	rel	M9	-10	16	rep	FALSE
0	coaA	heat shock	-46	-33	rep	FALSE
0	coaA	Iron supplement	-45	-30	act	TRUE
1	coaA	Iron supplement	-17	5	act	TRUE
2	coaA	Iron supplement	-37	-6	rep	TRUE
0	coaA	LB	-45	-30	act	TRUE
1	coaA	LB	-17	-7	act	TRUE
2	coaA	LB	-37	-33	rep	FALSE
3	coaA	LB	-18	1	rep	TRUE
0	coaA	M9	-46	-20	rep	TRUE
0	coaA	Anaerobic growth	-45	7	act	TRUE
1	coaA	Anaerobic growth	24	29	act	FALSE
2	coaA	Anaerobic growth	-37	-6	rep	TRUE
0	coaA	acetate	-16	-8	act	TRUE
1	coaA	acetate	-47	-34	rep	FALSE
2	coaA	acetate	-18	-4	rep	TRUE
0	coaA	phoP	-45	-30	act	TRUE
1	coaA	phoP	-19	-8	act	TRUE
0	coaA	Trehalose	-28	0	act	TRUE
1	coaA	Trehalose	-37	-4	rep	TRUE
0	coaA	Zinc supplement	-16	-8	act	TRUE
1	coaA	Zinc supplement	-37	-33	rep	FALSE
2	coaA	Zinc supplement	-18	-4	rep	TRUE
0	coaA	Xylose Arabinose	-45	-21	act	TRUE
1	coaA	Xylose Arabinose	-17	-1	act	TRUE
2	coaA	Xylose Arabinose	18	29	act	FALSE
3	coaA	Xylose Arabinose	-37	1	rep	TRUE
0	coaA	Xanthosine	-45	-30	act	TRUE
1	coaA	Xanthosine	-25	-8	act	TRUE
2	coaA	Xanthosine	-37	1	rep	TRUE
0	ybiO	heat shock	2	29	act	TRUE
1	ybiO	heat shock	-11	21	rep	TRUE
0	ybiO	Iron supplement	4	29	act	TRUE
1	ybiO	Iron supplement	-3	15	rep	TRUE
0	ybiO	LB	-32	-12	act	TRUE
1	ybiO	LB	-11	15	rep	TRUE
0	ybiO	Trehalose	-5	15	rep	TRUE
0	ybiO	Zinc supplement	10	26	act	TRUE
1	ybiO	Zinc supplement	-11	15	rep	TRUE
0	ybiO	Xylose Arabinose	2	28	act	TRUE
1	ybiO	Xylose Arabinose	-11	15	rep	TRUE
0	ybiO	Xanthosine	-27	-12	act	TRUE
1	ybiO	Xanthosine	-11	15	rep	TRUE
0	ybdG	LB	-35	0	act	TRUE
0	ybdG	0cAMP	-98	-92	act	FALSE
1	ybdG	0cAMP	-1	16	act	FALSE
0	ybdG	Xanthosine	-11	4	act	TRUE
0	ycbZ	heat shock	-37	-23	act	TRUE
1	ycbZ	heat shock	-14	8	act	TRUE
2	ycbZ	heat shock	-32	-22	rep	TRUE
3	ycbZ	heat shock	26	29	rep	TRUE
0	ycbZ	Iron supplement	-37	-23	act	TRUE
1	ycbZ	Iron supplement	-14	4	act	TRUE
2	ycbZ	Iron supplement	-32	-22	rep	TRUE
0	ycbZ	LB	-39	-3	act	TRUE
1	ycbZ	LB	-32	-22	rep	TRUE
0	ycbZ	Anaerobic growth	-38	-3	act	TRUE
1	ycbZ	Anaerobic growth	-32	-12	rep	TRUE
0	ycbZ	phoP	-37	-4	act	TRUE
1	ycbZ	phoP	-32	-24	rep	TRUE
0	ycbZ	0cAMP	-14	-4	act	TRUE
1	ycbZ	0cAMP	-32	-25	rep	TRUE
0	ycbZ	Trehalose	-37	-23	act	TRUE
1	ycbZ	Trehalose	-14	8	act	TRUE
2	ycbZ	Trehalose	-32	-24	rep	TRUE
0	ycbZ	Zinc supplement	-37	-23	act	TRUE
1	ycbZ	Zinc supplement	-14	8	act	TRUE
2	ycbZ	Zinc supplement	-32	-22	rep	TRUE
0	ycbZ	Xylose Arabinose	-37	8	act	TRUE
1	ycbZ	Xylose Arabinose	-32	-12	rep	TRUE
0	ycbZ	Xanthosine	-38	8	act	TRUE
1	ycbZ	Xanthosine	-32	-12	rep	TRUE
0	acuI	heat shock	-113	-88	act	FALSE
1	acuI	heat shock	-38	-16	act	FALSE
0	acuI	Iron supplement	-113	-101	act	FALSE
1	acuI	Iron supplement	-37	-16	act	FALSE
0	acuI	LB	-113	-101	act	FALSE
1	acuI	LB	-31	-16	act	FALSE
0	acuI	M9	-113	-100	act	FALSE
1	acuI	M9	-26	-16	act	FALSE
0	acuI	Anaerobic growth	-103	-99	act	FALSE
1	acuI	Anaerobic growth	-37	-16	act	FALSE
2	acuI	Anaerobic growth	-4	8	act	FALSE
3	acuI	Anaerobic growth	-34	-21	rep	FALSE
0	acuI	Trehalose	-37	-16	act	FALSE
0	acuI	Zinc supplement	-101	-88	act	FALSE
1	acuI	Zinc supplement	-26	-16	act	FALSE
0	acuI	Xylose Arabinose	-113	-100	act	FALSE
1	acuI	Xylose Arabinose	-37	-16	act	FALSE
0	acuI	Xanthosine	-113	-88	act	FALSE
1	acuI	Xanthosine	-31	-16	act	FALSE
0	leuABCD	heat shock	-38	-6	act	TRUE
0	leuABCD	Iron supplement	-38	7	act	TRUE
0	leuABCD	LB	-39	-4	act	TRUE
1	leuABCD	LB	-15	-8	rep	TRUE
2	leuABCD	LB	3	14	rep	FALSE
0	leuABCD	Anaerobic growth	-39	-31	act	TRUE
1	leuABCD	Anaerobic growth	-14	-6	act	TRUE
0	leuABCD	acetate	-50	-6	act	TRUE
0	leuABCD	0cAMP	-47	-31	act	TRUE
1	leuABCD	0cAMP	-13	-6	act	TRUE
2	leuABCD	0cAMP	-10	3	rep	TRUE
0	leuABCD	Trehalose	-47	-6	act	TRUE
1	leuABCD	Trehalose	-18	-10	rep	TRUE
0	leuABCD	Zinc supplement	-50	-6	act	TRUE
1	leuABCD	Zinc supplement	24	29	rep	FALSE
0	leuABCD	fum1	-48	-5	act	TRUE
0	leuABCD	Xylose Arabinose	-38	-6	act	TRUE
0	leuABCD	Xanthosine	-38	-6	act	TRUE
0	ybjL	heat shock	-14	0	act	TRUE
1	ybjL	heat shock	-20	-7	rep	TRUE
0	ybjL	Iron supplement	-26	-2	act	TRUE
1	ybjL	Iron supplement	-11	-7	rep	TRUE
0	ybjL	LB	-65	-53	act	TRUE
1	ybjL	LB	-19	-7	act	TRUE
2	ybjL	LB	-87	-78	rep	FALSE
3	ybjL	LB	-14	-2	rep	TRUE
0	ybjL	Anaerobic growth	-62	-53	act	TRUE
1	ybjL	Anaerobic growth	-87	-78	rep	FALSE
2	ybjL	Anaerobic growth	-14	-2	rep	TRUE
0	ybjL	Trehalose	-62	-53	act	TRUE
1	ybjL	Trehalose	-20	-7	act	TRUE
2	ybjL	Trehalose	3	13	rep	FALSE
0	ybjL	Zinc supplement	-65	-53	act	TRUE
1	ybjL	Zinc supplement	-15	-7	act	TRUE
0	ybjL	Xylose Arabinose	-65	-53	act	TRUE
1	ybjL	Xylose Arabinose	-15	-7	act	TRUE
2	ybjL	Xylose Arabinose	-80	-78	rep	FALSE
3	ybjL	Xylose Arabinose	-14	-2	rep	TRUE
0	ybjL	Xanthosine	-65	-47	act	TRUE
1	ybjL	Xanthosine	-80	-78	rep	FALSE
2	ybjL	Xanthosine	-14	-2	rep	TRUE
0	yecE	heat shock	-6	8	act	TRUE
1	yecE	heat shock	-35	3	rep	TRUE
0	yecE	Iron supplement	-31	17	act	TRUE
1	yecE	Iron supplement	-4	9	rep	TRUE
0	yecE	LB	-31	4	act	TRUE
1	yecE	LB	-6	4	rep	TRUE
0	yecE	M9	-6	9	act	TRUE
1	yecE	M9	-35	-10	rep	TRUE
0	yecE	Anaerobic growth	-31	17	act	TRUE
1	yecE	Anaerobic growth	-6	9	rep	TRUE
0	yecE	phoP	-32	14	act	TRUE
1	yecE	phoP	-6	9	rep	TRUE
0	yecE	deoR	-2	12	act	TRUE
0	yecE	Zinc supplement	-40	3	act	TRUE
1	yecE	Zinc supplement	-6	9	rep	TRUE
0	yecE	fum1	-32	3	act	TRUE
1	yecE	fum1	-12	9	rep	TRUE
0	yecE	Xylose Arabinose	-32	3	act	TRUE
1	yecE	Xylose Arabinose	-6	9	rep	TRUE
0	yecE	Xanthosine	-34	3	act	TRUE
1	yecE	Xanthosine	-6	9	rep	TRUE
0	yncD	heat shock	-47	-33	act	FALSE
1	yncD	heat shock	-18	-10	rep	TRUE
0	pitA	LB	-21	-3	act	TRUE
0	dusC	heat shock	-48	-42	act	TRUE
1	dusC	heat shock	-30	-19	act	TRUE
2	dusC	heat shock	-43	-16	rep	TRUE
0	dusC	Iron supplement	-48	-40	act	TRUE
1	dusC	Iron supplement	-30	-18	act	TRUE
2	dusC	Iron supplement	-43	-16	rep	TRUE
0	dusC	LB	-48	-42	act	TRUE
1	dusC	LB	-26	-18	act	TRUE
0	dusC	M9	-29	-16	act	TRUE
1	dusC	M9	-26	-19	rep	TRUE
0	dusC	Anaerobic growth	-48	-42	act	TRUE
1	dusC	Anaerobic growth	-28	-18	act	TRUE
0	dusC	0cAMP	-54	-46	act	FALSE
1	dusC	0cAMP	-24	-6	act	TRUE
0	dusC	Trehalose	-48	-42	act	TRUE
1	dusC	Trehalose	-30	-19	act	TRUE
2	dusC	Trehalose	-43	-16	rep	TRUE
0	dusC	Zinc supplement	-48	-42	act	TRUE
1	dusC	Zinc supplement	-30	-18	act	TRUE
2	dusC	Zinc supplement	-43	-16	rep	TRUE
0	dusC	Xylose Arabinose	-48	-18	act	TRUE
1	dusC	Xylose Arabinose	-43	-16	rep	TRUE
0	dusC	Xanthosine	-48	-42	act	TRUE
1	dusC	Xanthosine	-30	-18	act	TRUE
2	dusC	Xanthosine	-43	-16	rep	TRUE
0	ybjX	LB	-90	-72	act	FALSE
1	ybjX	LB	-17	-8	act	FALSE
0	dinJ	heat shock	-35	-33	act	FALSE
1	dinJ	heat shock	-17	-4	act	TRUE
2	dinJ	heat shock	-36	-21	rep	TRUE
3	dinJ	heat shock	5	14	rep	FALSE
0	dinJ	Iron supplement	-35	-32	act	FALSE
1	dinJ	Iron supplement	-17	-4	act	TRUE
0	dinJ	LB	-35	-32	act	FALSE
1	dinJ	LB	-17	-4	act	TRUE
0	dinJ	Anaerobic growth	-35	-4	act	TRUE
0	dinJ	0cAMP	-44	-26	act	TRUE
1	dinJ	0cAMP	-17	-7	act	TRUE
0	dinJ	Trehalose	-35	-33	act	FALSE
1	dinJ	Trehalose	-12	-4	act	TRUE
0	dinJ	Zinc supplement	-35	-32	act	FALSE
1	dinJ	Zinc supplement	-17	-4	act	TRUE
0	dinJ	Xylose Arabinose	-35	-32	act	FALSE
1	dinJ	Xylose Arabinose	-17	-4	act	TRUE
0	dinJ	Xanthosine	-35	-32	act	FALSE
1	dinJ	Xanthosine	-16	-6	act	TRUE
0	aphA	heat shock	-19	-8	act	TRUE
1	aphA	heat shock	-20	1	rep	TRUE
0	aphA	Iron supplement	-36	-30	act	TRUE
1	aphA	Iron supplement	-19	-1	act	TRUE
2	aphA	Iron supplement	-20	-6	rep	TRUE
0	aphA	LB	-43	-30	act	TRUE
1	aphA	LB	-14	-2	act	TRUE
2	aphA	LB	-21	-6	rep	TRUE
0	aphA	M9	-16	-7	rep	TRUE
0	aphA	Anaerobic growth	-71	-30	act	TRUE
1	aphA	Anaerobic growth	-17	7	act	TRUE
2	aphA	Anaerobic growth	-21	-7	rep	TRUE
0	aphA	deoR	-43	-29	act	TRUE
1	aphA	deoR	-15	-1	act	TRUE
2	aphA	deoR	-21	-6	rep	TRUE
0	aphA	0cAMP	-21	-7	rep	TRUE
0	aphA	Trehalose	-36	-30	act	TRUE
1	aphA	Trehalose	-14	-1	act	TRUE
2	aphA	Trehalose	-73	-62	rep	FALSE
3	aphA	Trehalose	-18	-7	rep	TRUE
0	aphA	Zinc supplement	-36	-30	act	TRUE
1	aphA	Zinc supplement	-19	-1	act	TRUE
2	aphA	Zinc supplement	-20	1	rep	TRUE
0	aphA	Xylose Arabinose	-36	-30	act	TRUE
1	aphA	Xylose Arabinose	-15	-2	act	TRUE
2	aphA	Xylose Arabinose	-73	-68	rep	FALSE
3	aphA	Xylose Arabinose	-21	-6	rep	TRUE
0	aphA	Xanthosine	-36	-30	act	TRUE
1	aphA	Xanthosine	-17	-7	act	TRUE
2	aphA	Xanthosine	-73	-62	rep	FALSE
3	aphA	Xanthosine	-21	-6	rep	TRUE
0	poxB	heat shock	-26	0	act	TRUE
0	poxB	Iron supplement	-18	-8	act	TRUE
0	poxB	Zinc supplement	-18	-8	act	TRUE
0	poxB	Xylose Arabinose	-18	-8	act	TRUE
0	yjjJ	heat shock	-22	8	rep	TRUE
0	yjjJ	heat shock	30	45	rep	FALSE
0	yjjJ	Iron supplement	9	22	act	TRUE
1	yjjJ	Iron supplement	-24	10	rep	TRUE
0	yjjJ	LB	-87	-67	act	FALSE
1	yjjJ	LB	-18	-6	act	TRUE
2	yjjJ	LB	15	16	rep	TRUE
0	yjjJ	Anaerobic growth	-24	14	act	TRUE
0	yjjJ	phoP	-18	19	act	TRUE
0	yjjJ	Trehalose	-1	11	act	TRUE
1	yjjJ	Trehalose	-13	14	rep	TRUE
0	yjjJ	Zinc supplement	-13	-7	rep	TRUE
0	yjjJ	Xylose Arabinose	-24	19	act	TRUE
1	yjjJ	Xylose Arabinose	15	18	rep	TRUE
0	yjjJ	Xanthosine	-22	14	act	TRUE
1	yjjJ	Xanthosine	9	18	rep	TRUE
0	yeiQ	LB	-44	-34	act	FALSE
0	yeiQ	Anaerobic growth	-76	-51	act	FALSE
1	yeiQ	Anaerobic growth	-25	-7	act	TRUE
2	yeiQ	Anaerobic growth	-1	13	rep	FALSE
0	yeiQ	Trehalose	-77	-62	act	FALSE
1	yeiQ	Trehalose	-13	-8	act	TRUE
0	yeiQ	Xylose Arabinose	-77	-64	act	FALSE
1	yeiQ	Xylose Arabinose	-36	-27	act	TRUE
2	yeiQ	Xylose Arabinose	-19	5	act	TRUE
3	yeiQ	Xylose Arabinose	8	13	rep	FALSE
0	yeiQ	Xanthosine	-77	-64	act	FALSE
1	yeiQ	Xanthosine	-13	0	act	TRUE
0	rapA	heat shock	-109	-99	act	FALSE
1	rapA	heat shock	-13	11	rep	TRUE
0	rapA	Iron supplement	-46	-25	act	TRUE
1	rapA	Iron supplement	-16	-5	act	TRUE
2	rapA	Iron supplement	-34	-19	rep	TRUE
3	rapA	Iron supplement	-14	8	rep	TRUE
0	rapA	LB	-44	-5	act	TRUE
1	rapA	LB	-11	3	rep	TRUE
0	rapA	M9	-15	11	rep	TRUE
1	rapA	M9	-112	-99	act	FALSE
0	rapA	Anaerobic growth	-35	-5	act	TRUE
1	rapA	Anaerobic growth	-19	-8	rep	TRUE
0	rapA	deoR	-109	-90	act	FALSE
0	rapA	Trehalose	-38	-30	act	FALSE
1	rapA	Trehalose	-12	-5	act	TRUE
2	rapA	Trehalose	-13	11	rep	TRUE
0	rapA	Zinc supplement	-36	-5	act	TRUE
1	rapA	Zinc supplement	-34	11	rep	TRUE
0	rapA	Xylose Arabinose	-36	-5	act	TRUE
1	rapA	Xylose Arabinose	-34	8	rep	TRUE
0	rapA	Xanthosine	-36	-5	act	TRUE
1	rapA	Xanthosine	-19	0	rep	TRUE
0	rumB	Anaerobic growth	-45	3	act	TRUE
0	thiM	heat shock	-42	-29	act	TRUE
1	thiM	heat shock	-13	2	act	TRUE
2	thiM	heat shock	-9	4	rep	TRUE
0	thiM	Iron supplement	-42	2	act	TRUE
0	thiM	LB	-42	-29	act	TRUE
1	thiM	LB	-12	1	act	TRUE
0	thiM	M9	-42	-29	act	TRUE
1	thiM	M9	-12	2	act	TRUE
0	thiM	Anaerobic growth	-46	-29	act	TRUE
1	thiM	Anaerobic growth	-13	-4	act	TRUE
0	thiM	acetate	-42	2	act	TRUE
0	thiM	deoR	-12	1	rep	TRUE
0	thiM	0cAMP	-46	-7	act	TRUE
0	thiM	Trehalose	-42	-29	act	TRUE
1	thiM	Trehalose	-13	2	act	TRUE
0	thiM	Zinc supplement	-46	-29	act	TRUE
1	thiM	Zinc supplement	-13	2	act	TRUE
0	thiM	fum1	-35	2	act	TRUE
0	thiM	Xylose Arabinose	-46	-29	act	TRUE
1	thiM	Xylose Arabinose	-13	2	act	TRUE
0	thiM	Xanthosine	-42	-29	act	TRUE
1	thiM	Xanthosine	-12	1	act	TRUE
0	minC	heat shock	-38	-31	act	FALSE
1	minC	heat shock	-15	-2	act	TRUE
0	minC	Iron supplement	-38	-34	act	FALSE
1	minC	Iron supplement	-15	-3	act	TRUE
0	minC	LB	-38	-34	act	FALSE
1	minC	LB	-15	-2	act	TRUE
0	minC	Anaerobic growth	-38	-2	act	TRUE
0	minC	Trehalose	-38	-31	act	FALSE
1	minC	Trehalose	-15	-1	act	TRUE
0	minC	Zinc supplement	-37	-31	act	FALSE
1	minC	Zinc supplement	-15	-1	act	TRUE
0	minC	Xylose Arabinose	-37	-31	act	FALSE
1	minC	Xylose Arabinose	-15	-2	act	TRUE
0	minC	Xanthosine	-39	-29	act	TRUE
1	minC	Xanthosine	-15	-5	act	TRUE
0	arcA	Iron supplement	-103	-87	act	FALSE
0	arcA	LB	-106	-87	act	FALSE
1	arcA	LB	-64	-56	rep	TRUE
0	arcA	Anaerobic growth	-99	-63	act	TRUE
1	arcA	Anaerobic growth	-21	-8	act	TRUE
0	arcA	Trehalose	-104	-87	act	FALSE
0	arcA	Zinc supplement	-104	-87	act	FALSE
1	arcA	Zinc supplement	-64	-56	rep	TRUE
0	arcA	Xylose Arabinose	-104	-87	act	FALSE
1	arcA	Xylose Arabinose	-64	-56	rep	TRUE
0	arcA	Xanthosine	-114	-91	act	FALSE
1	arcA	Xanthosine	-64	-56	rep	TRUE
0	holC	heat shock	-35	7	act	TRUE
0	holC	Anaerobic growth	-35	-24	act	FALSE
0	tff-rpsB-tsf	heat shock	-90	-80	act	TRUE
1	tff-rpsB-tsf	heat shock	-44	-35	act	FALSE
2	tff-rpsB-tsf	heat shock	-18	-9	act	TRUE
3	tff-rpsB-tsf	heat shock	-8	7	rep	TRUE
0	tff-rpsB-tsf	Iron supplement	-44	-35	act	FALSE
1	tff-rpsB-tsf	Iron supplement	-18	0	act	TRUE
0	tff-rpsB-tsf	LB	-44	-31	act	TRUE
1	tff-rpsB-tsf	LB	-19	-8	act	TRUE
0	tff-rpsB-tsf	Anaerobic growth	-44	-35	act	FALSE
1	tff-rpsB-tsf	Anaerobic growth	-19	0	act	TRUE
0	tff-rpsB-tsf	phoP	-44	-31	act	TRUE
1	tff-rpsB-tsf	phoP	-18	0	act	TRUE
0	tff-rpsB-tsf	0cAMP	-44	-31	act	TRUE
1	tff-rpsB-tsf	0cAMP	-19	0	act	TRUE
0	tff-rpsB-tsf	Trehalose	-44	-31	act	TRUE
1	tff-rpsB-tsf	Trehalose	-18	0	act	TRUE
2	tff-rpsB-tsf	Trehalose	-6	7	rep	FALSE
0	tff-rpsB-tsf	Zinc supplement	-44	-35	act	FALSE
1	tff-rpsB-tsf	Zinc supplement	-19	0	act	TRUE
0	tff-rpsB-tsf	Xylose Arabinose	-45	-36	act	FALSE
1	tff-rpsB-tsf	Xylose Arabinose	-19	0	act	TRUE
0	tff-rpsB-tsf	Xanthosine	-45	-31	act	TRUE
1	tff-rpsB-tsf	Xanthosine	-19	-8	act	TRUE
0	ygeR	heat shock	-54	-22	act	TRUE
1	ygeR	heat shock	-14	4	act	TRUE
2	ygeR	heat shock	-31	-16	rep	FALSE
0	ygeR	Iron supplement	-34	-23	act	TRUE
1	ygeR	Iron supplement	-14	-6	act	TRUE
2	ygeR	Iron supplement	-31	-17	rep	FALSE
0	ygeR	arabinose	-14	-5	act	TRUE
1	ygeR	arabinose	-31	-16	rep	FALSE
0	ygeR	LB	-45	-33	act	FALSE
1	ygeR	LB	-14	-6	act	TRUE
2	ygeR	LB	-42	-16	rep	TRUE
0	ygeR	Anaerobic growth	-34	-5	act	TRUE
1	ygeR	Anaerobic growth	-31	-17	rep	FALSE
0	ygeR	Zinc supplement	-35	-26	act	TRUE
1	ygeR	Zinc supplement	-14	5	act	TRUE
2	ygeR	Zinc supplement	-37	-16	rep	TRUE
0	ygeR	Xylose Arabinose	-42	-5	act	TRUE
1	ygeR	Xylose Arabinose	-38	-16	rep	TRUE
0	ygeR	Xanthosine	-34	5	act	TRUE
1	ygeR	Xanthosine	-41	-16	rep	TRUE
0	xylA	Xylose Arabinose	-88	-21	act	TRUE
0	xylA	Xanthosine	-47	-36	rep	FALSE
0	mscS	heat shock	-37	-30	act	TRUE
1	mscS	heat shock	-23	-6	act	TRUE
2	mscS	heat shock	-17	-1	rep	TRUE
0	mscS	Iron supplement	-19	-6	act	TRUE
0	mscS	LB	-47	0	act	TRUE
1	mscS	LB	-35	-25	rep	TRUE
0	mscS	Zinc supplement	-23	-6	act	TRUE
0	mscS	Xylose Arabinose	-39	-37	act	FALSE
1	mscS	Xylose Arabinose	-22	-6	act	TRUE
2	mscS	Xylose Arabinose	-16	-1	rep	TRUE
0	mscS	Xanthosine	-23	-7	act	TRUE
0	marR	LB	-84	-65	act	FALSE
1	marR	LB	-46	-40	act	TRUE
2	marR	LB	-23	-18	act	TRUE
3	marR	LB	-34	-24	rep	FALSE
4	marR	LB	-14	14	rep	FALSE
0	fdhE	heat shock	-115	-99	act	FALSE
0	fdhE	Iron supplement	-12	-8	act	TRUE
1	fdhE	Iron supplement	-46	-33	rep	FALSE
0	fdhE	LB	-19	-8	act	TRUE
0	fdhE	M9	-115	-99	act	FALSE
0	fdhE	Anaerobic growth	-50	-34	act	FALSE
1	fdhE	Anaerobic growth	-19	4	act	TRUE
0	fdhE	Trehalose	-19	-8	act	TRUE
0	fdhE	Zinc supplement	-19	-8	act	TRUE
0	fdhE	Xylose Arabinose	-19	-8	act	TRUE
1	fdhE	Xylose Arabinose	-48	-33	rep	FALSE
0	fdhE	Xanthosine	-19	-1	act	TRUE
1	fdhE	Xanthosine	-46	-33	rep	FALSE
0	ykgE	heat shock	-45	-16	act	TRUE
1	ykgE	heat shock	-72	-37	rep	TRUE
0	ykgE	Iron supplement	-72	-37	act	TRUE
1	ykgE	Iron supplement	-45	-16	rep	TRUE
0	ykgE	LB	-72	-37	act	TRUE
1	ykgE	LB	-45	-22	rep	TRUE
0	ykgE	M9	-45	-22	act	TRUE
1	ykgE	M9	-65	-59	rep	TRUE
2	ykgE	M9	-48	-37	rep	TRUE
0	ykgE	Anaerobic growth	-102	-80	act	FALSE
1	ykgE	Anaerobic growth	-75	-36	act	TRUE
2	ykgE	Anaerobic growth	-44	-22	rep	TRUE
0	ykgE	Trehalose	-98	-90	act	FALSE
1	ykgE	Trehalose	-72	-37	act	TRUE
2	ykgE	Trehalose	-44	-22	rep	TRUE
0	ykgE	Zinc supplement	-74	-37	act	TRUE
1	ykgE	Zinc supplement	-44	-22	rep	TRUE
0	ykgE	Xylose Arabinose	-74	-36	act	TRUE
1	ykgE	Xylose Arabinose	-44	-22	rep	TRUE
0	ykgE	Xanthosine	-72	-37	act	TRUE
1	ykgE	Xanthosine	-44	-16	rep	TRUE
0	mutM	LB	-23	-9	rep	FALSE
1	mutM	LB	17	29	rep	FALSE
0	ftsK	Iron supplement	-16	-11	act	TRUE
0	ftsK	LB	-48	-11	act	TRUE
1	ftsK	LB	-45	-38	rep	FALSE
0	ftsK	Anaerobic growth	-46	-36	act	FALSE
1	ftsK	Anaerobic growth	-16	-11	act	TRUE
2	ftsK	Anaerobic growth	-39	-38	rep	FALSE
0	ftsK	0cAMP	-39	-32	rep	TRUE
0	ftsK	Zinc supplement	-16	-11	act	TRUE
0	ftsK	Xylose Arabinose	-38	-35	act	FALSE
1	ftsK	Xylose Arabinose	-16	-11	act	TRUE
2	ftsK	Xylose Arabinose	-45	-38	rep	FALSE
0	ftsK	Xanthosine	-48	-35	act	FALSE
1	ftsK	Xanthosine	-21	-11	act	TRUE
2	ftsK	Xanthosine	-45	-39	rep	FALSE
0	ftsK	acetate	-8	4	rep	FALSE
0	maoP	heat shock	-79	-71	act	FALSE
1	maoP	heat shock	-60	-5	act	TRUE
2	maoP	heat shock	-24	-11	rep	TRUE
0	maoP	Iron supplement	-79	-8	act	TRUE
1	maoP	Iron supplement	-24	-13	rep	TRUE
0	maoP	LB	-80	-8	act	TRUE
0	maoP	M9	-22	-12	rep	TRUE
0	maoP	Anaerobic growth	-80	-17	act	TRUE
0	maoP	phoP	-100	-71	act	FALSE
0	maoP	0cAMP	-78	-8	act	TRUE
0	maoP	Zinc supplement	-80	-5	act	TRUE
1	maoP	Zinc supplement	-24	-13	rep	TRUE
0	maoP	Xylose Arabinose	-79	-6	act	TRUE
1	maoP	Xylose Arabinose	-22	-13	rep	TRUE
0	maoP	Xanthosine	-72	-59	act	TRUE
1	maoP	Xanthosine	-51	-6	act	TRUE
2	maoP	Xanthosine	-25	-13	rep	TRUE
